# Supplementary material
Source: publisher figshare collection journal article supplement (https://gsajournals.figshare.com/articles/dataset/_/11663970)
Supplement: Supplementary file 1 [file 2]

## Sheet: F2_genotype
File S1. Polymorphic tags and individual genotypes of F2 population derived from NH80-A × TA95
Tag ID	Chr	Position	GBS05	GBS06	GBS07	GBS08	GBS09	GBS10	GBS11	GBS12	GBS13	GBS14	GBS15	GBS16	GBS17	GBS18	GBS19	GBS20	GBS21	GBS22	GBS23	GBS24	GBS25	GBS26	GBS27	GBS28	GBS29	GBS30	GBS32	GBS33	GBS34	GBS35	GBS36	GBS37	GBS38	GBS39	GBS40	GBS41	GBS42	GBS43	GBS44	GBS45	GBS46	GBS47	GBS48	GBS53	GBS54	GBS55	GBS56
5	A01	10011525	H	-	H	H	H	B	H	H	-	H	A	B	H	H	-	A	H	-	H	A	H	-	H	H	H	H	A	H	H	A	H	B	H	B	B	H	B	H	H	H	A	H	A	A	A	H	A
19	A01	10142654	H	H	H	H	H	H	H	H	H	H	H	H	H	H	H	H	H	H	H	H	H	H	H	-	H	H	H	H	H	H	H	H	H	-	H	H	H	H	H	H	H	H	H	H	H	H	H
33	A01	1026700	B	B	H	A	H	A	-	-	H	H	H	B	H	H	-	H	A	A	H	-	B	A	B	H	-	H	H	B	H	-	H	H	B	H	A	H	H	-	H	B	H	A	-	A	A	H	-
39	A01	10282358	H	A	H	H	H	B	H	H	B	H	A	B	H	H	B	A	H	A	H	A	H	B	H	H	H	H	A	H	H	A	H	B	H	B	B	H	B	H	H	H	A	H	A	-	H	H	A
48	A01	10346349	H	B	B	H	H	H	H	H	H	H	H	H	H	B	B	H	B	H	H	H	H	H	A	H	A	A	A	H	H	B	H	H	H	H	H	A	H	H	-	A	B	H	A	A	B	H	H
51	A01	10372696	H	A	H	H	H	B	H	H	B	H	A	B	H	H	-	A	H	A	H	A	H	B	H	H	H	H	A	H	H	-	H	-	H	B	B	H	B	H	H	H	A	H	A	A	H	H	A
78	A01	10658796	H	A	H	H	H	B	H	H	B	H	A	-	H	H	B	A	H	A	H	-	H	B	H	H	H	H	A	H	H	A	H	-	H	B	B	H	B	H	H	H	A	H	A	A	H	H	A
92	A01	10731330	H	A	H	H	H	-	H	H	-	H	A	-	H	H	B	A	H	A	-	-	H	B	H	H	-	-	A	H	H	A	H	B	H	-	-	H	B	H	H	H	A	-	A	A	H	H	A
111	A01	1083925	B	-	H	A	H	-	B	A	H	H	H	B	H	H	B	H	A	A	H	A	B	-	B	H	A	-	H	B	H	H	H	H	B	H	A	H	H	B	H	B	H	A	A	A	A	H	H
137	A01	1101324	B	B	H	-	H	-	B	A	H	H	H	-	H	H	-	H	-	A	H	A	B	A	B	H	A	H	H	B	H	H	H	H	B	H	A	-	H	B	H	B	H	A	A	A	A	H	H
149	A01	1107587	B	B	H	A	H	A	B	A	H	H	H	B	H	H	-	H	A	A	H	A	-	A	B	H	A	H	H	-	H	H	H	H	B	H	A	H	H	B	H	-	H	A	A	A	A	H	H
205	A01	1151190	B	B	H	A	H	-	B	A	H	H	H	B	H	H	B	H	A	A	H	A	B	A	B	H	A	H	H	B	H	H	H	H	B	H	A	H	H	B	H	B	H	A	A	A	A	H	H
231	A01	11715223	H	A	H	H	H	B	A	H	B	H	A	B	H	H	B	A	H	A	H	A	H	B	H	H	H	H	A	H	H	A	H	B	H	B	B	H	B	H	H	H	A	H	A	A	H	H	A
233	A01	11742842	H	A	H	H	H	B	A	H	-	H	A	B	H	-	B	A	H	A	H	A	H	-	H	H	H	H	A	H	H	A	H	B	H	B	B	H	B	H	H	H	A	H	A	A	H	H	A
240	A01	11815835	-	H	H	H	H	A	H	H	B	H	A	-	H	B	H	H	B	B	A	A	H	H	A	A	-	H	H	B	-	B	B	A	H	H	B	H	H	B	H	H	B	A	H	H	A	H	A
250	A01	11904175	H	A	H	-	-	B	A	H	-	-	A	B	H	H	B	A	H	A	H	A	H	B	-	-	-	-	A	-	H	-	H	B	-	B	B	H	B	H	-	H	-	H	A	A	-	H	A
268	A01	12002743	H	-	H	H	H	B	A	H	B	H	A	B	H	H	B	A	H	A	H	A	H	B	H	H	H	H	A	H	H	A	H	B	H	B	B	H	B	H	H	H	A	H	A	A	H	H	A
342	A01	12665143	-	H	-	H	H	-	H	H	H	H	H	H	H	H	H	H	H	H	-	H	H	H	H	H	H	H	H	H	H	H	H	-	H	H	-	H	H	H	-	H	H	H	H	H	H	H	H
362	A01	128627	B	B	H	-	H	-	B	A	H	H	H	B	H	H	H	H	A	A	H	A	B	A	-	H	A	H	B	B	H	H	H	B	-	H	A	H	H	B	H	B	H	A	A	A	A	H	B
373	A01	129101	B	B	H	A	H	A	B	A	H	H	H	B	H	H	H	H	A	A	H	A	B	A	B	H	A	H	B	B	H	H	H	B	B	H	A	H	H	B	H	B	H	A	A	A	A	H	B
387	A01	1302257	B	B	H	A	H	A	B	A	H	H	H	B	H	A	B	H	A	A	H	A	B	A	B	H	A	H	H	B	H	H	H	H	B	H	A	H	H	B	H	B	H	A	A	A	A	H	H
488	A01	13551410	H	A	A	H	A	H	-	H	H	-	H	H	A	H	H	H	H	H	H	-	H	H	H	H	H	H	H	H	H	H	-	H	H	H	H	H	H	H	-	-	H	H	H	H	H	H	A
563	A01	142008	B	B	H	A	H	A	-	A	H	H	H	-	H	H	H	H	A	-	H	A	-	A	B	H	A	H	B	B	H	H	H	B	B	H	A	H	H	B	H	B	H	-	A	A	-	H	B
633	A01	14779811	H	A	H	H	H	-	A	H	B	H	A	-	H	H	B	A	H	A	H	A	H	-	H	H	H	H	A	H	H	A	H	B	H	-	-	H	B	H	H	A	A	H	A	A	H	H	A
681	A01	1532729	B	B	H	A	H	-	B	A	H	H	H	B	H	A	-	H	A	A	H	A	B	A	B	H	A	H	H	B	H	H	H	H	B	H	A	H	H	B	H	B	H	A	A	A	-	H	H
690	A01	15434036	H	H	H	H	H	H	H	H	H	H	H	H	H	H	H	H	H	H	-	H	H	H	H	H	H	H	-	H	H	H	H	H	H	H	H	H	H	H	H	H	H	H	H	A	H	H	H
703	A01	15600026	H	A	H	H	H	B	A	H	B	H	A	B	H	H	-	A	H	-	H	A	H	B	H	H	H	H	A	H	H	A	H	B	H	B	-	H	-	H	H	H	A	H	A	A	H	H	A
706	A01	15604494	H	A	H	H	H	B	-	H	-	H	A	-	H	H	-	A	H	A	-	A	H	B	H	H	H	H	A	H	H	A	H	B	H	B	B	H	B	H	H	H	A	H	A	A	H	H	A
768	A01	16165524	H	A	H	H	H	B	A	H	B	H	A	B	H	H	B	A	H	A	H	A	H	B	H	H	H	H	A	H	H	A	B	B	H	B	B	H	B	H	H	-	A	H	A	A	H	H	A
786	A01	16368949	H	B	H	H	H	A	B	B	H	H	H	H	H	H	B	H	B	B	H	H	H	H	A	H	A	A	A	H	H	H	A	H	B	H	B	H	B	H	H	H	H	H	A	A	B	H	H
807	A01	1656833	B	B	H	A	H	-	B	A	H	H	H	B	H	A	B	H	A	A	H	-	B	-	B	H	A	H	H	B	H	H	H	H	B	H	A	H	H	B	H	-	H	A	A	A	A	H	H
846	A01	16958457	H	A	H	H	H	-	A	H	B	H	A	B	H	H	B	A	H	A	H	A	H	B	H	H	H	H	A	H	H	A	B	-	H	B	B	H	B	H	H	A	A	H	A	A	H	H	A
864	A01	17120758	H	A	H	H	H	B	A	H	B	H	A	B	H	H	B	A	H	A	H	A	H	B	H	H	H	H	A	H	H	A	B	-	H	B	B	H	H	H	H	A	-	H	A	A	H	H	A
869	A01	17149042	-	H	H	B	-	-	B	-	-	H	B	A	H	B	H	H	H	B	H	H	H	H	B	H	H	H	-	H	H	H	-	H	H	H	-	-	H	H	H	H	A	A	H	A	B	B	B
887	A01	1731384	B	B	H	A	H	A	B	A	H	H	H	B	H	A	B	H	A	A	H	A	B	A	B	H	-	H	H	B	H	H	H	H	B	H	A	H	H	B	H	B	H	A	A	-	A	H	H
892	A01	17330381	H	A	H	H	H	B	A	H	B	H	A	B	H	H	B	A	H	A	H	A	H	B	H	H	H	H	A	H	H	A	B	B	H	B	B	-	B	H	H	A	A	H	A	A	H	H	A
936	A01	17847011	H	A	H	H	H	-	A	B	B	H	A	B	H	H	B	A	H	A	H	A	H	B	H	H	H	H	A	H	H	A	B	B	H	B	B	H	B	H	H	A	A	H	A	A	H	H	A
943	A01	1788575	B	B	H	A	H	A	B	A	H	H	H	-	H	A	B	H	A	A	H	A	B	A	-	H	A	H	-	B	H	H	H	H	B	H	A	H	H	B	H	B	H	-	A	A	A	H	H
946	A01	17895743	H	A	H	H	H	B	A	B	B	H	A	B	H	H	B	-	H	A	H	-	H	-	H	H	H	H	A	H	H	-	-	B	-	B	B	H	B	H	H	A	-	H	A	A	H	H	A
962	A01	1798914	B	B	H	A	H	A	B	A	H	H	H	B	H	A	B	H	A	A	H	A	B	A	B	H	A	H	H	B	H	H	H	H	B	H	A	H	H	B	H	B	H	A	A	A	A	-	H
1003	A01	1840522	-	B	H	A	H	A	-	A	H	H	H	B	H	A	B	H	A	A	H	A	B	A	B	H	A	H	H	-	H	H	H	H	B	H	A	H	H	B	H	B	H	A	A	A	A	H	H
1004	A01	1840525	B	B	H	-	H	A	B	A	H	H	H	B	H	A	B	H	A	A	H	-	B	A	B	H	-	H	H	B	H	H	-	H	B	H	A	H	H	B	H	B	H	A	A	A	A	H	H
1005	A01	1841422	B	B	H	A	H	A	B	A	H	H	H	B	H	A	B	H	A	A	H	A	B	A	B	H	A	H	H	B	H	H	H	H	B	H	A	H	H	B	H	B	H	A	A	A	A	H	H
1019	A01	1848474	H	H	H	H	H	H	H	H	H	H	-	H	H	H	H	H	H	H	H	H	H	H	A	H	H	A	A	H	H	H	H	H	H	H	H	H	H	H	H	A	H	H	A	A	H	H	H
1020	A01	1848477	H	H	H	H	H	H	H	H	H	H	H	H	H	H	H	H	H	H	H	H	H	H	A	H	A	A	H	H	H	H	H	H	H	H	H	A	H	H	H	A	H	H	A	A	H	H	H
1062	A01	18955875	H	A	H	H	H	B	A	B	B	A	A	B	H	H	B	A	H	A	H	A	H	B	H	H	H	H	A	H	H	A	B	B	H	B	B	H	B	H	H	A	A	H	A	A	H	H	A
1074	A01	19044178	H	A	H	H	H	B	A	B	B	A	A	B	H	H	B	A	H	A	H	A	H	B	H	H	H	H	H	H	H	A	B	B	H	B	B	H	B	H	H	A	A	H	A	A	H	H	A
1075	A01	19044181	H	A	H	H	H	B	A	B	B	A	A	B	H	H	B	A	H	A	H	A	H	B	H	H	H	H	H	H	H	A	B	-	H	B	B	H	B	H	H	A	A	H	A	A	H	H	A
1087	A01	1917837	B	B	H	A	H	A	B	A	H	H	H	B	H	A	B	A	A	A	H	A	B	A	B	H	A	H	H	B	H	H	H	H	B	H	A	H	H	B	H	B	H	A	A	A	A	H	H
1093	A01	1925618	B	B	H	A	H	A	B	A	H	H	H	B	H	A	B	A	A	A	H	A	B	A	B	H	A	H	H	B	H	H	H	H	B	H	A	H	H	-	H	B	H	A	A	A	A	H	H
1097	A01	19286062	H	A	H	A	H	-	A	B	-	A	A	B	H	-	B	A	H	A	H	A	H	B	H	H	H	H	H	H	H	A	B	B	H	B	B	H	B	H	H	A	A	H	A	A	H	H	A
1117	A01	19423020	H	-	H	H	H	-	A	-	-	-	-	B	H	H	B	-	H	A	H	-	-	B	H	H	H	H	H	H	H	A	-	-	-	B	B	H	B	H	H	A	A	H	A	A	H	H	-
1173	A01	20071121	H	A	H	B	H	H	-	H	H	A	-	H	H	B	H	A	H	-	B	-	H	H	A	H	B	H	H	H	H	A	B	H	H	H	-	H	H	H	H	A	-	H	-	-	H	H	-
1175	A01	20080306	H	-	H	H	H	B	A	B	H	A	A	B	H	H	B	A	H	A	H	A	H	B	A	H	H	H	H	H	-	A	B	B	H	-	B	H	B	H	H	A	A	H	A	A	H	H	A
1176	A01	20080309	-	-	H	H	H	B	A	B	H	A	A	B	H	H	B	A	H	A	H	A	H	B	A	H	H	H	H	H	H	A	B	B	H	B	B	H	B	H	H	A	-	H	A	A	H	H	A
1178	A01	20114658	H	A	H	H	H	-	A	B	H	A	A	B	H	H	B	A	H	A	H	A	H	B	A	H	H	H	H	H	H	A	B	B	H	B	B	H	B	H	H	A	A	H	A	A	H	A	A
1179	A01	20114928	H	A	H	H	-	B	A	B	H	A	A	-	H	H	-	A	H	A	H	A	H	B	A	H	H	H	H	H	H	A	B	-	H	B	B	H	B	H	H	A	A	H	A	A	H	A	A
1181	A01	20116145	H	-	H	H	-	-	-	-	H	A	-	B	H	H	B	A	H	A	H	A	H	B	A	H	H	H	H	H	H	A	B	B	H	B	-	H	B	H	H	A	-	H	A	-	H	A	A
1184	A01	2012561	H	H	H	H	H	H	H	A	H	H	A	H	-	H	-	H	H	H	-	H	H	A	H	A	H	H	A	H	H	-	H	A	A	-	H	H	H	H	-	H	H	H	H	A	A	-	-
1197	A01	20293410	H	A	H	H	H	H	A	H	H	A	-	H	H	H	H	A	H	-	H	-	H	H	A	H	H	H	H	H	H	-	H	H	H	H	H	H	H	H	H	-	A	H	A	-	H	-	-
1209	A01	20396360	H	H	H	H	H	H	H	H	H	-	H	H	H	H	H	H	H	H	H	H	H	H	H	H	-	H	H	-	H	-	H	H	H	H	H	H	H	H	H	H	H	H	H	H	-	H	H
1212	A01	20405843	H	A	H	H	-	-	A	B	H	A	A	B	H	H	-	A	H	A	-	A	H	B	A	H	-	-	H	H	-	A	B	H	A	B	B	H	B	A	-	A	A	H	A	A	H	A	A
1217	A01	20462078	H	A	H	H	H	B	A	B	H	A	A	B	H	H	B	A	H	A	H	A	H	B	A	H	H	H	H	H	H	A	B	B	H	B	B	H	B	H	H	A	A	H	A	A	H	A	-
1218	A01	20462580	H	A	H	H	H	B	A	B	H	A	A	B	H	H	B	A	H	A	H	A	H	B	A	H	H	H	H	H	H	A	B	B	H	B	B	H	B	H	H	A	A	H	A	A	H	A	A
1224	A01	20554751	H	H	H	H	H	H	H	H	H	H	H	H	H	H	H	H	H	H	-	H	H	H	H	-	H	H	H	H	H	-	-	H	H	H	H	H	H	H	H	-	-	H	H	H	H	H	H
1245	A01	20740674	H	A	H	H	H	-	A	B	H	A	A	B	H	H	-	A	H	A	H	-	H	B	A	H	H	H	H	H	H	-	-	B	H	B	B	H	B	H	H	A	A	H	A	A	H	A	A
1247	A01	20774650	H	A	H	H	H	-	-	B	H	A	A	B	H	H	B	A	H	A	H	A	H	B	A	H	H	H	H	H	H	A	B	B	H	B	B	H	B	H	H	A	A	H	A	A	H	A	A
1252	A01	20800594	H	A	H	H	H	-	A	B	H	A	A	B	H	H	B	A	H	A	H	A	H	B	A	H	H	H	H	H	H	A	B	B	H	B	B	H	B	H	H	A	A	H	A	A	H	A	A
1265	A01	20921183	H	-	H	H	H	-	A	B	H	A	A	B	H	-	B	A	H	A	H	A	H	-	A	H	H	H	H	-	H	A	B	B	H	B	B	H	B	H	H	A	A	H	-	-	H	A	A
1268	A01	20921450	H	A	H	H	H	B	A	B	H	A	A	B	H	A	B	A	H	A	H	A	H	B	A	H	H	H	H	H	H	A	-	B	H	B	B	H	B	H	H	A	A	H	A	A	H	-	A
1293	A01	2112165	-	H	H	A	H	A	B	A	H	H	H	B	H	A	-	A	A	A	H	A	B	A	B	H	A	H	H	B	H	H	H	H	B	H	A	H	H	B	H	B	H	A	A	A	A	H	H
1297	A01	21143080	H	A	H	H	H	-	-	B	H	A	A	B	B	A	B	A	H	A	H	A	H	-	A	H	H	H	H	H	H	-	B	-	H	B	B	H	B	H	H	A	-	H	A	A	H	A	-
1309	A01	21193337	H	A	H	H	H	B	H	B	H	A	A	B	B	A	B	A	H	A	H	A	H	B	A	H	H	H	H	H	H	A	B	B	H	B	B	H	B	H	H	A	A	H	H	A	H	A	A
1334	A01	21326980	H	-	H	H	H	B	-	-	H	A	A	B	-	-	-	A	H	A	H	-	H	B	A	H	H	H	-	H	H	A	-	B	H	B	B	H	B	H	H	A	-	H	H	-	H	A	-
1335	A01	21326983	H	A	H	H	H	B	A	B	H	A	A	B	B	-	B	A	H	A	H	A	H	B	A	H	H	H	H	H	H	A	B	B	H	B	B	H	B	H	H	-	A	H	H	A	-	A	A
1372	A01	21579812	H	H	-	-	A	H	H	H	A	A	B	H	A	B	H	B	H	B	B	H	H	H	H	H	B	-	A	H	A	H	H	A	A	H	B	H	-	-	H	A	-	H	H	B	H	A	H
1417	A01	2182042	B	H	H	A	H	A	B	A	H	H	H	B	H	A	B	-	A	A	H	A	B	A	B	H	A	H	H	B	H	H	H	H	B	H	A	H	H	B	H	B	H	A	A	A	A	H	H
1419	A01	21931409	H	A	H	A	H	B	A	B	H	A	A	B	-	A	B	A	H	A	H	-	H	B	A	H	H	H	H	H	H	A	B	B	H	B	B	H	B	H	H	A	H	H	H	H	H	A	A
1462	A01	22367068	H	-	H	A	H	B	A	B	H	A	A	B	B	A	H	A	H	A	H	A	H	B	A	H	H	H	H	H	H	A	B	B	-	B	B	H	B	H	H	A	H	H	H	-	H	A	A
1463	A01	22369763	H	A	H	-	H	B	A	B	H	A	A	B	B	A	H	A	H	A	H	A	H	B	-	H	H	H	H	H	H	A	B	B	H	B	B	H	B	H	H	A	H	H	H	H	-	A	A
1490	A01	22525310	H	H	H	-	H	B	A	B	H	A	A	B	B	A	H	A	H	A	H	A	H	B	A	H	H	H	H	H	H	A	B	B	H	B	B	H	B	H	H	A	H	H	H	H	H	A	A
1492	A01	22529410	H	H	H	A	H	B	A	B	H	A	A	B	B	-	H	A	H	A	H	A	H	B	A	H	H	H	H	H	H	A	B	B	H	B	B	H	H	H	H	A	H	H	H	H	H	A	A
1499	A01	22574459	H	H	H	H	H	H	H	A	H	H	A	H	A	H	A	H	H	H	H	A	H	H	H	H	A	H	H	H	H	A	H	H	A	A	H	H	H	H	H	H	H	H	-	A	A	H	H
1514	A01	22751998	H	H	H	A	H	B	A	B	H	A	A	B	B	A	H	A	H	A	H	A	H	B	A	H	H	H	H	H	H	A	B	-	H	B	B	H	B	H	H	A	H	H	H	H	H	A	A
1517	A01	22801790	H	H	H	A	H	B	A	B	H	A	A	B	B	A	H	A	H	A	H	A	-	B	A	H	H	H	H	H	H	A	B	B	H	B	B	H	-	H	H	A	H	H	H	H	H	A	A
1526	A01	22910239	H	H	-	H	H	H	-	H	H	B	B	H	H	B	H	H	A	A	-	A	-	-	B	-	H	H	-	A	-	A	H	H	-	H	A	A	H	H	H	B	H	H	H	H	B	B	H
1530	A01	23010140	H	H	H	A	H	B	A	B	H	A	A	B	B	A	H	A	H	A	H	A	H	B	A	H	H	H	H	H	H	A	B	H	H	B	B	H	B	H	H	A	H	H	H	H	H	A	A
1534	A01	23050554	H	H	H	A	H	B	A	B	H	A	A	-	B	A	-	A	H	-	H	-	H	-	A	H	H	H	H	H	H	-	B	-	H	B	B	H	B	-	H	A	H	H	H	H	H	-	A
1540	A01	23128149	H	H	H	A	H	B	-	B	H	A	A	B	B	A	H	A	H	A	H	A	H	B	A	H	H	H	H	H	H	A	B	H	H	B	B	H	B	H	H	A	H	H	H	H	H	A	A
1580	A01	23314007	A	H	B	H	H	H	B	A	H	B	B	H	B	A	-	H	H	A	A	H	H	H	A	B	A	H	H	-	H	H	A	B	H	A	H	H	A	A	H	A	B	B	H	H	H	B	B
1585	A01	23321797	A	H	B	H	H	H	B	A	H	B	B	H	B	A	A	H	H	A	A	H	H	H	A	-	A	H	H	H	H	H	A	B	H	A	H	H	A	A	H	A	B	B	H	H	H	B	B
1685	A01	23672723	-	H	H	A	H	H	A	B	H	A	A	B	B	A	-	H	H	A	H	A	A	B	A	H	H	H	H	H	B	A	B	H	H	B	B	H	B	H	H	-	H	H	H	H	H	A	A
1696	A01	23820273	H	H	H	A	H	H	A	B	H	A	A	B	B	A	H	H	H	A	H	A	A	B	A	H	H	H	H	H	B	A	B	H	H	B	B	H	B	H	H	A	H	-	H	H	H	A	A
1701	A01	23883594	H	H	H	A	H	H	A	B	H	A	A	B	B	A	H	H	H	A	H	-	A	B	A	H	H	H	H	H	B	A	B	H	H	B	B	H	B	H	H	A	H	H	H	H	H	A	A
1723	A01	24229331	H	H	H	A	H	H	A	B	H	A	A	H	B	A	H	H	H	A	H	A	A	B	A	H	H	A	H	A	-	-	B	H	H	B	B	H	B	H	H	-	H	H	H	H	H	A	A
1727	A01	24235284	H	H	H	A	H	H	A	B	H	A	A	H	B	A	H	H	H	A	H	A	A	B	A	H	H	A	H	A	B	A	B	H	H	B	B	H	B	H	H	A	H	H	H	H	H	A	A
1728	A01	24249510	H	H	H	A	H	H	A	B	H	A	A	H	B	A	H	H	H	A	H	A	A	B	A	H	H	A	H	A	B	A	B	H	H	B	B	H	B	H	H	A	H	H	H	H	H	A	A
1729	A01	24249513	H	H	H	A	H	H	A	B	H	A	-	-	B	A	H	H	H	-	H	A	A	B	-	H	H	A	H	-	B	-	B	H	H	B	B	H	B	H	H	A	H	-	H	H	H	-	-
1735	A01	24254435	H	H	H	A	H	H	A	B	H	A	A	H	B	A	H	H	H	A	H	A	A	B	A	H	H	A	H	A	B	A	B	H	H	B	B	H	B	H	H	A	H	H	H	-	H	A	A
1737	A01	24255109	H	H	H	A	H	H	A	B	H	A	A	H	B	A	H	H	H	A	H	A	A	B	A	H	H	A	H	A	B	A	B	H	H	B	B	H	B	H	H	A	H	H	H	H	H	A	A
1744	A01	24263546	B	H	H	A	H	H	A	B	H	A	A	H	-	A	H	H	H	A	H	A	A	B	A	H	H	A	H	A	B	-	B	H	H	B	B	H	B	H	H	A	H	H	H	H	H	A	A
1745	A01	24263549	B	H	H	A	H	H	A	-	H	A	-	H	B	A	H	H	H	A	H	A	A	-	A	H	H	A	H	A	-	A	-	-	H	B	-	H	B	H	-	A	H	H	H	H	H	-	A
1752	A01	24287778	-	-	-	-	H	-	A	B	H	-	-	H	B	-	H	H	H	A	H	A	A	-	-	H	H	A	H	A	B	A	-	H	H	B	B	H	B	-	H	-	-	H	H	H	H	A	A
1755	A01	24291781	B	H	H	A	H	H	A	B	H	A	A	H	B	A	H	H	H	A	H	-	A	B	-	H	H	A	H	A	B	-	B	H	H	-	-	H	-	H	H	-	H	H	H	H	H	A	A
1772	A01	24402897	B	H	H	A	H	H	A	-	H	A	A	H	B	A	H	H	H	A	H	-	A	B	A	H	H	-	H	A	B	A	B	H	H	B	B	H	-	H	H	-	H	H	H	H	H	-	-
1775	A01	24406425	B	H	H	A	H	H	A	B	H	A	A	H	-	A	H	H	H	-	H	A	A	-	A	H	H	A	H	-	B	A	B	H	H	B	-	H	B	-	-	-	H	H	H	H	H	A	-
1783	A01	24427055	B	H	H	A	H	H	A	B	H	A	A	H	B	A	H	H	H	A	H	A	A	B	A	H	H	A	H	A	B	A	B	H	H	B	B	H	B	H	H	A	H	H	H	H	H	A	A
1787	A01	24457936	-	H	H	-	-	H	A	B	H	A	A	H	B	-	H	H	-	A	H	A	A	B	A	-	H	A	H	-	B	-	B	H	H	B	B	H	B	H	H	A	H	H	H	H	H	A	A
1792	A01	2448110	H	-	H	A	H	A	-	A	H	H	H	B	H	A	B	-	A	A	H	A	-	A	B	H	A	H	H	B	H	H	H	-	-	H	-	H	-	B	H	B	H	A	A	A	A	H	H
1810	A01	24621037	B	H	H	A	H	H	A	B	H	A	A	H	B	A	H	H	H	A	H	H	A	-	A	H	H	A	H	A	B	H	B	H	H	B	B	H	B	H	H	A	H	B	H	H	H	-	-
1811	A01	24621160	B	H	H	A	H	H	A	B	H	A	A	H	-	A	H	H	H	A	H	H	A	B	A	H	H	A	H	A	B	H	B	H	H	B	B	H	B	H	H	A	H	B	H	H	H	A	-
1815	A01	24654389	B	H	H	A	H	H	A	B	H	A	A	H	B	A	H	H	H	A	H	H	A	B	A	H	H	A	H	A	B	H	B	H	H	B	B	H	B	H	H	A	H	B	H	H	H	-	A
1824	A01	24691084	B	H	H	A	H	H	A	B	H	A	A	H	B	A	H	H	H	A	H	H	A	B	A	H	H	A	H	A	B	H	B	H	H	B	B	H	B	H	H	A	H	B	H	H	H	A	A
1831	A01	24765816	B	H	H	A	H	H	A	B	H	A	-	H	B	A	H	H	H	A	H	H	A	B	A	H	H	A	H	A	B	H	B	H	H	B	B	H	B	H	H	A	H	B	H	H	H	A	A
1848	A01	24891865	H	H	H	-	H	H	A	B	H	-	A	H	-	A	H	H	H	A	H	H	A	-	A	H	H	A	H	A	B	H	B	H	H	-	B	H	B	H	H	A	B	B	H	H	H	A	-
1886	A01	2507978	H	H	H	A	H	A	-	A	H	H	H	B	H	A	B	A	A	-	H	A	B	A	B	H	A	H	H	B	H	H	H	H	B	H	A	H	H	B	H	B	H	A	A	A	A	H	H
1891	A01	2510877	H	H	H	A	H	A	B	A	H	H	H	B	H	A	B	A	A	A	H	A	B	A	B	H	A	H	H	B	H	H	H	H	B	H	A	H	H	B	H	B	H	A	A	A	A	H	H
1895	A01	25114959	H	H	H	A	H	H	A	B	H	A	A	H	-	H	H	H	H	A	H	H	A	-	A	H	H	A	H	A	-	H	-	H	H	B	-	H	B	H	H	-	-	-	H	-	H	A	A
1898	A01	25132850	-	H	H	A	H	H	A	B	H	A	A	H	-	H	H	H	H	-	H	H	A	B	A	H	H	A	H	A	B	H	B	H	H	-	B	H	B	H	H	A	B	B	H	H	H	A	A
1900	A01	25134637	H	H	H	A	H	H	A	B	H	A	A	H	B	H	H	H	H	A	H	H	A	B	A	H	H	A	H	A	B	H	B	H	H	B	B	H	B	H	H	A	B	B	H	H	H	A	A
1919	A01	25299446	H	H	H	A	H	H	A	B	H	A	A	H	B	H	H	H	H	A	H	H	A	B	A	H	H	A	H	A	B	H	B	H	H	B	B	H	B	H	H	A	B	B	H	H	H	A	H
1922	A01	25316326	H	H	H	A	H	H	A	B	H	A	-	H	B	H	H	H	H	A	-	H	A	B	-	H	H	A	H	-	B	H	B	H	H	B	B	H	B	H	H	A	B	B	H	H	H	A	H
1926	A01	25370527	H	H	H	-	H	H	A	B	H	A	A	H	B	H	H	H	H	A	H	H	A	B	A	H	H	A	H	A	B	H	B	H	H	B	B	H	B	H	H	A	B	B	H	B	H	A	H
1928	A01	2537105	H	H	H	A	H	A	B	-	-	H	H	B	H	A	B	A	A	-	H	A	B	A	-	H	A	H	H	-	H	-	H	H	B	H	A	H	H	B	H	B	H	A	A	A	A	H	H
1931	A01	25391027	H	H	H	A	H	H	A	B	H	-	A	H	B	H	H	H	H	A	H	-	A	-	A	H	H	A	H	-	-	H	B	-	H	-	-	H	B	H	H	A	-	B	H	B	H	A	H
1946	A01	25441472	H	H	H	A	A	H	A	B	H	A	A	H	B	H	H	H	H	A	H	H	-	B	A	-	H	A	H	A	B	H	B	H	H	B	B	H	B	H	H	A	B	B	H	B	H	A	H
1950	A01	25486573	-	H	H	-	A	H	A	B	H	A	A	H	B	H	H	H	H	A	H	H	A	B	A	H	H	A	H	A	B	H	-	H	H	B	B	H	B	H	H	A	B	B	H	B	H	-	H
1951	A01	25488935	H	H	H	A	A	H	A	-	H	A	A	H	B	H	H	H	H	A	H	H	A	B	A	H	H	A	H	A	B	H	B	H	H	B	B	H	B	H	H	A	B	B	H	B	H	A	H
1956	A01	25531583	H	H	H	A	A	H	A	B	H	A	A	H	B	H	H	H	H	A	H	H	A	B	A	H	H	A	H	A	B	H	B	H	H	-	B	H	B	H	H	A	B	B	H	B	H	A	H
1963	A01	25570431	H	H	H	A	A	H	A	B	H	-	A	H	B	H	H	H	H	A	H	H	A	B	A	H	H	-	H	A	B	H	-	H	H	B	B	H	B	H	H	-	B	B	H	B	H	A	H
1965	A01	25596264	H	H	H	A	A	H	A	B	H	-	A	H	B	H	H	H	H	A	H	H	-	B	-	H	H	A	H	A	B	H	B	H	H	B	-	H	B	H	H	-	B	B	H	B	H	A	H
1972	A01	25664920	H	H	H	A	A	H	-	-	H	A	A	H	B	H	H	H	H	A	H	H	-	B	A	H	H	A	H	A	B	H	B	H	-	-	B	H	B	H	H	A	B	B	H	B	H	A	H
1974	A01	25667605	H	H	H	A	A	H	-	B	H	-	A	H	B	-	H	H	H	A	H	H	A	B	A	H	H	A	H	-	B	H	B	-	H	B	B	H	B	H	H	A	B	B	H	B	H	A	H
1978	A01	25681909	H	H	H	A	A	H	A	-	H	A	A	H	B	H	H	H	H	A	H	H	A	B	A	H	H	A	H	A	B	H	-	H	H	B	B	H	B	H	H	-	B	B	H	B	H	A	-
1987	A01	25749606	H	H	H	A	A	H	A	B	H	A	A	H	B	H	H	H	H	A	H	H	A	-	A	H	H	A	H	A	B	H	B	H	H	B	B	H	B	H	H	A	B	B	H	B	H	A	H
2018	A01	25927704	-	H	H	A	A	H	A	B	H	A	A	H	B	H	H	H	A	A	H	B	A	B	A	H	H	A	H	A	B	H	H	H	H	B	B	H	B	H	H	A	B	B	H	B	-	A	H
2023	A01	25970515	A	H	H	H	A	A	A	-	H	H	H	H	H	H	H	H	A	H	H	H	A	H	B	H	A	H	H	-	H	A	A	H	A	H	H	A	A	H	-	A	A	H	-	H	A	H	A
2028	A01	2601652	H	H	H	A	H	A	B	A	H	H	H	B	H	A	B	A	A	A	H	A	B	A	B	H	A	H	H	B	H	H	H	H	-	H	H	H	H	B	H	B	H	A	A	A	A	H	H
2039	A01	26139643	B	H	B	-	B	H	H	-	H	H	-	B	-	H	H	H	H	B	H	H	H	A	B	H	-	H	H	H	H	H	A	H	-	B	H	-	H	H	H	B	B	H	B	H	A	H	B
2092	A01	26490791	H	H	H	A	A	H	H	-	H	A	A	H	B	H	H	H	A	-	A	B	A	-	-	H	H	A	H	A	B	H	H	H	H	B	B	H	B	H	H	A	B	B	H	B	H	A	H
2099	A01	26508620	H	H	H	A	A	H	H	B	H	A	H	H	B	H	H	H	A	A	A	B	A	B	A	H	H	A	B	A	B	H	H	H	H	B	B	H	B	H	H	A	B	B	H	B	H	A	H
2100	A01	26508623	H	-	H	-	-	-	H	B	H	A	H	H	B	H	H	H	-	A	-	B	-	-	-	H	H	A	-	-	B	H	H	H	H	B	B	H	B	H	H	-	B	-	H	B	H	-	-
2101	A01	26514206	H	H	H	-	A	H	H	-	-	-	H	H	B	H	H	H	A	A	A	B	-	B	A	H	H	A	B	A	B	H	H	H	H	B	B	H	-	H	H	-	B	-	H	B	H	A	H
2108	A01	26548938	H	H	H	A	A	H	H	B	H	A	H	H	B	H	H	-	A	-	-	B	A	B	A	H	H	A	B	-	-	H	-	H	H	B	B	H	B	H	H	A	B	B	H	-	H	A	H
2116	A01	26591190	H	H	H	A	A	H	H	B	H	A	H	H	B	H	H	H	A	A	A	B	A	B	A	H	H	A	B	A	B	H	H	H	H	B	B	H	B	H	H	A	B	B	H	B	H	A	H
2118	A01	26591951	H	H	H	A	A	H	H	B	H	A	H	H	B	H	H	H	A	A	A	B	A	B	A	H	H	A	B	A	B	H	H	H	H	B	B	H	B	H	H	A	B	B	H	-	H	A	H
2119	A01	26591954	H	H	H	-	A	H	H	-	H	A	H	H	B	H	H	H	A	A	-	B	A	B	A	H	H	-	B	-	B	H	H	H	H	B	-	H	B	H	H	-	-	-	H	B	H	-	H
2122	A01	26602371	H	H	H	A	A	H	H	B	H	A	H	H	B	H	H	H	A	A	A	-	A	H	A	H	-	A	B	A	-	H	-	H	-	B	-	H	B	H	H	A	B	B	H	B	H	A	H
2123	A01	26602374	H	H	H	A	A	H	-	B	H	-	H	H	B	H	H	-	A	A	A	-	A	H	A	H	H	-	-	A	B	H	H	H	H	B	B	-	B	H	H	A	B	B	H	B	H	A	H
2132	A01	26646311	H	H	H	A	A	H	H	B	H	A	H	H	B	H	H	H	A	A	A	B	A	H	A	H	H	A	B	A	B	H	H	H	H	B	B	H	B	H	H	-	B	B	H	B	H	A	H
2160	A01	2732592	H	H	H	A	H	H	B	A	H	H	H	B	H	H	B	A	A	-	H	A	B	A	B	H	A	H	H	B	H	H	H	H	B	H	H	H	H	-	H	B	H	H	A	A	A	H	H
2161	A01	2734034	H	H	H	A	H	H	B	A	H	H	H	B	H	H	B	A	A	A	H	A	B	A	B	H	A	H	H	B	H	H	H	H	B	H	H	H	H	B	H	B	H	H	A	A	A	H	H
2173	A01	2821946	H	H	H	-	H	H	B	A	H	H	H	B	H	H	B	-	A	A	H	A	-	A	B	H	A	H	H	B	H	H	H	H	B	H	H	H	H	-	H	-	H	H	A	A	A	H	H
2175	A01	2838957	H	H	H	H	A	H	H	A	H	A	H	H	H	A	H	A	H	H	H	H	A	H	H	H	A	H	H	H	A	H	H	H	H	-	-	H	A	H	H	H	A	H	H	H	H	A	H
2181	A01	2901429	H	H	H	A	A	-	B	A	H	H	H	B	H	H	-	A	A	A	H	A	B	A	B	-	A	H	H	B	H	H	H	H	B	H	-	H	H	B	H	-	H	H	A	A	A	H	H
2192	A01	2955849	H	H	H	A	A	-	B	H	H	H	H	B	H	H	B	A	-	A	H	A	B	A	B	H	A	H	H	B	H	H	H	H	-	H	H	H	H	B	H	B	H	H	A	A	A	H	H
2194	A01	2955855	H	H	H	-	A	H	B	H	H	H	H	-	-	H	B	A	A	A	H	A	-	-	-	H	A	H	H	-	H	H	H	H	-	H	H	-	H	B	H	B	H	H	A	-	-	H	H
2204	A01	3000706	H	H	H	A	A	H	B	H	B	H	H	B	H	H	B	A	A	A	H	A	B	A	B	H	A	H	H	B	H	H	H	H	B	H	H	H	H	B	H	B	H	H	A	A	A	H	H
2222	A01	3179200	H	H	H	A	-	H	B	H	-	H	H	B	H	H	B	-	-	A	H	-	B	A	-	H	A	H	H	-	H	H	H	H	B	H	H	H	H	B	H	B	H	H	A	A	A	H	H
2237	A01	3301311	H	A	H	A	A	H	H	H	H	H	H	-	H	H	H	-	A	A	-	A	H	A	H	H	-	H	H	H	H	H	-	H	H	H	H	H	H	H	H	-	H	H	-	-	A	H	H
2243	A01	3371447	H	H	H	H	H	H	H	A	H	H	A	H	A	H	-	H	H	-	H	A	-	A	-	H	-	H	A	H	H	A	A	A	A	A	H	A	H	H	H	H	H	H	H	-	-	H	H
2271	A01	3546172	H	A	H	A	A	H	-	H	B	H	H	B	H	H	-	A	A	A	H	-	B	H	-	H	A	H	H	B	H	H	H	H	B	H	H	H	H	B	H	B	H	-	A	A	A	H	H
2286	A01	3621440	-	A	H	A	A	H	B	H	B	-	H	B	H	H	B	A	A	A	H	A	B	-	B	H	A	H	H	B	H	H	H	H	B	H	H	H	H	B	H	B	H	H	A	A	A	H	H
2325	A01	3829218	H	A	H	A	A	H	B	H	-	H	H	B	H	H	-	A	A	-	H	A	-	H	B	H	A	H	H	B	H	H	H	H	B	H	H	H	H	H	H	B	H	H	A	-	A	H	H
2353	A01	4115097	H	A	H	A	A	H	B	H	H	H	A	B	H	H	B	A	A	A	H	A	B	H	-	H	A	H	H	H	H	H	H	H	B	H	H	H	H	H	H	B	H	H	A	A	A	H	H
2354	A01	4115666	H	A	H	-	-	H	B	H	B	H	A	B	H	H	B	A	A	A	H	A	B	H	B	H	-	H	H	H	H	H	H	H	B	H	H	H	H	-	H	B	H	H	A	A	A	H	H
2355	A01	4115687	H	A	H	A	-	H	B	H	-	H	A	B	-	H	B	A	A	A	H	A	B	H	B	H	A	H	H	H	H	H	-	H	B	H	H	H	H	H	H	B	H	H	A	A	A	H	H
2358	A01	4120212	H	A	H	A	A	H	B	H	B	H	A	B	H	H	B	A	A	A	H	A	B	H	-	H	A	H	H	H	H	H	H	H	B	H	H	H	H	H	H	B	H	H	A	A	A	H	H
2374	A01	4252035	H	H	H	H	H	B	B	H	H	B	A	H	A	H	H	H	H	H	-	A	H	A	H	H	-	H	A	H	H	H	A	A	A	H	H	-	H	B	B	B	H	H	A	A	A	B	B
2380	A01	4264516	H	A	H	A	A	H	-	H	B	H	A	B	H	H	B	A	A	A	H	A	B	H	B	H	-	H	H	H	H	H	H	H	B	H	H	H	H	H	H	B	H	H	A	A	A	H	H
2388	A01	4329040	H	A	H	A	A	H	B	H	B	H	A	B	H	H	B	A	A	A	H	A	B	H	B	H	A	H	H	H	H	H	H	H	B	H	H	H	H	H	H	B	H	H	A	A	A	H	H
2446	A01	4764458	H	-	H	H	H	H	H	H	H	H	H	A	H	H	H	H	H	H	H	A	H	A	A	H	H	H	H	A	H	H	A	H	H	H	H	H	H	-	H	H	H	H	A	A	H	H	H
2453	A01	479167	-	B	H	A	H	-	B	A	H	H	H	B	H	H	H	H	A	-	H	A	B	-	B	H	A	H	B	-	-	H	H	-	-	H	A	H	H	-	H	-	H	A	-	A	A	H	-
2456	A01	485880	B	B	H	A	H	-	B	A	H	H	H	B	-	H	H	H	A	A	H	A	B	A	B	H	-	H	B	-	H	H	H	B	B	H	-	H	H	B	H	B	H	-	A	A	A	H	B
2463	A01	4906416	H	A	-	A	A	H	-	H	B	H	A	B	H	H	B	A	A	-	H	A	H	H	B	H	A	H	H	H	H	H	H	H	-	H	H	H	H	-	H	-	H	H	A	A	A	H	H
2485	A01	5027321	H	A	H	A	H	H	B	H	B	H	A	-	H	H	B	A	A	A	H	A	H	H	B	H	A	H	H	H	H	H	H	H	B	H	H	H	-	H	H	H	H	H	A	A	A	H	H
2492	A01	5065171	H	A	H	A	H	H	B	H	B	H	A	B	H	H	B	A	-	A	H	A	H	H	B	H	A	H	H	H	H	H	H	H	B	H	H	H	H	H	H	H	H	H	A	A	A	H	H
2496	A01	5229706	H	A	H	A	H	H	B	H	B	H	-	B	H	H	B	A	A	A	H	A	H	H	B	H	A	H	H	H	H	H	H	H	B	H	H	H	H	H	H	H	H	H	A	A	A	H	H
2497	A01	5229709	H	A	H	A	H	H	B	H	B	H	A	B	H	H	B	A	A	A	H	A	H	H	B	-	A	H	H	H	H	H	H	H	B	H	H	H	H	H	H	H	H	H	A	A	A	H	H
2511	A01	5291715	H	A	H	A	H	H	B	H	B	H	A	B	H	H	B	A	A	A	H	A	H	H	B	H	A	H	A	-	H	H	H	H	B	H	H	H	H	H	H	H	H	H	A	A	A	H	H
2537	A01	5454917	H	A	H	A	H	H	B	H	B	B	-	B	H	H	B	A	A	A	H	A	H	B	B	H	A	H	A	H	H	H	H	H	B	H	H	H	H	H	H	H	H	H	A	A	A	H	H
2592	A01	5891957	H	A	H	A	H	H	B	H	B	B	A	B	H	H	B	A	A	A	H	A	H	B	B	H	A	A	A	H	H	H	H	H	B	H	H	H	H	H	H	H	H	H	A	A	A	H	H
2595	A01	5892514	H	A	H	A	H	H	B	H	B	B	A	B	H	H	B	A	A	A	H	-	H	B	B	H	A	A	A	H	H	H	H	H	B	H	H	H	H	H	H	H	H	H	A	A	A	H	H
2596	A01	5894556	H	A	H	-	H	H	B	H	B	B	A	B	H	H	B	A	A	A	H	A	H	B	B	H	A	A	A	H	H	-	H	H	B	H	H	H	H	H	H	H	-	H	A	A	A	H	H
2627	A01	6161830	H	A	H	A	H	H	B	H	B	B	A	B	H	H	B	A	A	A	H	A	H	B	B	H	A	A	A	H	H	H	H	H	B	H	H	H	B	H	H	H	H	H	A	A	A	H	H
2657	A01	6351063	H	-	H	A	H	H	B	H	B	B	A	B	H	H	B	A	A	A	H	A	H	B	H	H	A	A	A	H	H	H	H	H	B	H	B	H	B	H	H	H	H	H	A	A	A	H	H
2659	A01	6369020	H	A	H	A	H	H	H	H	B	B	A	B	-	H	B	A	A	A	H	A	H	B	H	H	A	A	A	H	-	H	H	H	B	H	B	H	B	H	H	H	-	H	A	A	A	-	H
2718	A01	6880433	H	A	A	A	H	H	H	H	B	-	A	B	H	H	B	A	A	A	H	A	H	B	H	H	A	A	A	H	H	H	H	H	B	B	B	H	B	H	H	H	H	H	A	A	A	H	H
2788	A01	7504930	H	A	A	A	H	H	H	H	B	B	A	B	H	H	B	A	A	A	H	A	H	B	H	H	A	A	A	H	H	-	H	H	B	B	B	H	B	H	H	H	H	H	A	A	A	B	H
2822	A01	7707542	H	A	A	A	H	H	H	H	B	B	A	B	H	H	B	A	A	A	H	-	H	-	H	H	A	A	A	H	H	H	H	H	B	B	B	H	B	H	H	H	H	H	A	A	A	B	H
2826	A01	7712578	H	A	A	A	H	H	H	H	B	B	A	B	H	H	B	A	A	A	H	A	H	B	H	H	A	A	A	H	H	H	H	H	-	B	B	H	B	H	H	H	H	B	A	A	A	B	-
2830	A01	7752917	H	H	H	A	H	H	H	H	B	B	-	B	H	H	B	-	A	A	H	A	H	B	H	-	A	A	A	H	H	H	H	H	B	B	B	H	-	H	H	H	H	H	A	A	A	B	H
2831	A01	7752920	H	A	H	A	H	H	H	H	B	B	A	B	H	H	B	A	A	A	H	A	H	B	H	H	A	A	A	H	H	H	H	H	B	B	B	H	B	H	H	H	H	H	A	A	A	B	H
2838	A01	7797369	H	A	H	-	H	H	H	H	B	B	A	B	H	H	B	-	A	-	H	-	H	B	H	H	A	A	A	H	-	H	H	H	B	B	-	H	B	H	H	H	H	H	A	A	-	B	H
2854	A01	7874319	H	A	H	A	H	H	H	H	B	B	-	-	H	H	-	A	A	A	H	A	H	B	H	H	-	A	A	H	H	H	H	H	B	B	-	H	B	H	H	H	H	H	A	A	A	B	H
2855	A01	7880402	H	A	H	A	H	H	H	H	B	B	A	B	H	H	B	A	A	A	H	-	H	B	H	H	A	A	A	H	H	H	H	H	B	B	B	H	B	H	H	H	H	H	A	A	A	B	H
2863	A01	7938149	H	A	H	A	H	H	H	H	B	-	A	B	H	H	B	A	A	A	H	A	H	B	H	H	A	A	A	H	H	H	H	B	B	B	B	H	B	H	H	H	H	H	A	A	A	B	H
2877	A01	800178	B	B	H	A	H	A	B	A	H	H	H	B	H	H	B	H	A	A	H	A	B	A	H	H	-	H	B	B	H	H	H	H	B	H	A	H	H	-	H	B	H	A	A	A	A	H	B
2892	A01	814530	B	B	H	A	H	A	B	A	H	H	H	-	H	H	B	H	A	A	H	A	B	A	B	H	A	H	B	B	H	H	H	H	B	H	A	H	H	B	H	B	H	A	A	A	A	H	-
2894	A01	8145371	H	A	H	A	H	-	H	H	B	B	A	B	H	H	B	A	A	A	H	A	H	B	H	H	A	A	A	H	H	H	H	B	B	-	B	H	B	H	H	H	H	H	A	A	-	H	H
2904	A01	821309	B	-	H	A	H	A	B	A	H	H	H	B	H	H	B	H	A	A	H	A	B	-	B	H	A	H	B	B	H	H	-	H	B	H	A	H	H	B	H	B	-	A	A	A	A	H	B
2925	A01	8373786	H	A	H	A	H	B	H	H	B	B	A	B	H	H	B	A	A	A	H	A	H	B	H	H	H	-	A	H	H	H	H	B	B	B	B	H	B	H	H	H	H	H	A	A	A	H	H
2930	A01	8414360	H	A	H	A	H	B	H	H	B	-	A	B	H	H	B	A	A	-	H	A	H	B	H	H	H	A	A	H	H	H	H	B	B	B	B	H	B	H	H	H	H	H	A	A	A	H	H
2933	A01	8427870	H	-	H	A	H	B	H	H	B	B	A	B	H	H	-	A	A	A	H	-	H	B	H	H	H	A	A	H	H	H	H	-	B	-	B	H	B	H	H	H	H	H	-	A	A	H	H
2936	A01	8509101	H	A	H	A	H	B	H	H	-	B	A	-	H	H	-	A	A	A	H	A	H	B	H	H	H	A	-	H	H	H	H	B	B	-	B	H	B	H	H	H	H	H	A	A	A	H	H
2937	A01	8509104	H	A	H	A	H	B	H	H	B	B	A	B	H	H	B	A	A	A	H	A	H	-	H	H	H	A	A	H	H	H	H	B	B	B	B	H	B	H	H	H	-	H	A	A	A	H	H
2953	A01	8611708	H	A	H	A	H	B	H	H	B	-	A	B	H	H	B	A	A	A	H	A	H	B	H	-	H	A	A	H	H	H	H	B	B	B	B	H	B	H	H	H	H	H	A	A	A	H	A
2958	A01	865745	B	B	H	A	H	A	B	A	H	H	H	B	H	H	-	H	A	A	H	A	B	A	B	H	A	H	B	B	H	H	H	H	B	H	A	H	H	B	H	B	H	A	A	A	A	H	H
2994	A01	8865074	H	-	H	H	H	H	H	H	H	H	H	H	-	H	H	H	H	H	H	-	H	H	-	-	H	H	H	H	H	H	H	H	H	H	H	H	H	H	H	H	H	H	H	H	H	H	H
3023	A01	902585	B	B	H	A	H	A	B	A	H	-	H	B	H	H	B	H	A	A	H	A	B	-	B	H	-	H	B	B	H	H	H	H	B	H	A	H	H	B	H	B	H	A	A	A	A	H	H
3028	A01	9041894	B	A	B	B	H	H	H	H	H	H	B	B	A	H	H	A	A	B	H	H	H	A	B	A	H	H	H	A	-	A	H	H	A	B	H	H	H	H	H	H	B	H	H	H	A	H	H
3038	A01	9064453	H	A	H	A	H	B	H	H	B	B	A	-	H	H	B	A	A	-	H	A	H	B	H	H	H	A	A	H	H	H	H	B	B	-	B	H	B	H	H	H	-	H	A	A	A	H	A
3047	A01	9141926	H	-	H	H	H	B	H	H	-	-	A	B	H	-	-	A	A	A	H	A	H	B	H	H	H	-	A	H	H	H	H	-	H	B	B	H	B	H	H	H	A	H	A	A	-	H	A
3049	A01	9167136	H	A	H	H	H	B	H	H	B	-	A	-	H	H	B	A	A	A	H	-	H	B	H	-	H	A	A	H	H	H	H	B	-	B	B	H	B	H	H	H	A	H	A	-	-	H	A
3058	A01	9204248	H	A	H	H	H	B	H	H	B	-	A	B	H	H	B	A	A	-	H	A	H	B	H	H	H	A	-	H	H	H	H	B	H	B	B	H	B	H	H	H	A	H	A	A	A	H	A
3073	A01	9311466	H	A	H	H	H	B	H	H	B	B	A	B	H	H	-	A	A	A	H	A	H	-	H	H	H	H	-	H	H	H	H	B	H	B	-	H	B	H	H	H	A	H	A	A	A	H	A
3078	A01	9359009	H	-	-	H	H	B	H	H	-	B	-	B	H	-	B	A	A	A	H	-	H	-	H	H	H	H	A	H	H	H	H	-	H	-	B	H	B	H	H	H	-	H	-	A	A	H	A
3079	A01	9359012	H	A	H	H	H	-	H	H	B	B	A	B	H	H	B	A	A	A	H	A	H	-	H	H	H	H	A	H	H	H	H	B	H	-	B	H	B	H	H	H	A	H	A	A	A	H	A
3103	A01	9508004	H	A	H	H	H	B	H	H	-	B	A	B	H	H	B	A	A	A	H	A	H	-	H	-	H	H	A	H	H	H	H	B	H	B	B	H	B	H	H	H	-	H	A	A	A	H	A
3104	A01	9516458	H	A	H	H	H	B	H	H	B	B	-	B	H	H	B	A	-	A	H	-	H	-	H	H	H	H	-	H	H	H	H	B	-	B	-	H	B	H	H	H	A	H	A	A	A	H	A
3112	A01	9555741	H	A	H	H	H	B	H	H	B	B	-	B	H	H	B	-	-	A	H	A	H	-	H	H	H	H	-	H	H	H	H	B	-	-	B	H	B	H	-	H	A	H	A	A	A	-	A
3114	A01	9591735	H	A	H	H	H	B	H	H	-	B	-	B	H	H	-	-	A	A	H	A	H	B	H	H	H	H	A	H	H	H	H	B	H	B	-	H	B	H	H	H	-	H	A	A	A	H	A
3120	A01	9638514	B	H	B	H	H	A	A	A	H	B	H	A	B	H	B	B	H	H	A	H	B	B	A	H	A	B	H	H	H	H	H	H	A	H	H	H	H	H	B	A	H	A	B	H	A	A	A
3123	A01	9684614	H	A	H	H	H	B	H	-	B	H	A	-	H	H	B	A	A	A	H	-	H	B	H	H	H	H	A	H	H	H	H	-	H	B	B	H	B	H	-	H	A	-	A	A	A	H	-
3127	A01	9708749	H	A	H	H	H	B	H	H	B	H	A	B	H	H	B	A	A	A	H	A	H	B	H	H	H	H	A	H	H	H	H	B	H	B	B	H	B	H	H	H	A	H	A	A	A	H	A
3130	A01	9724986	H	-	H	H	H	B	H	H	B	H	A	B	H	H	-	A	A	A	H	-	H	B	H	H	H	H	-	H	H	H	H	B	H	B	B	H	B	H	H	H	A	H	A	A	A	H	A
3139	A01	9773076	H	A	H	H	H	B	H	H	B	H	A	-	H	H	B	A	A	A	H	A	H	B	H	H	H	H	A	H	H	H	H	B	H	B	B	H	B	H	H	H	A	H	A	A	A	H	-
3145	A01	9812144	H	A	H	H	-	B	-	H	B	H	A	B	H	H	B	A	H	A	H	A	H	-	-	H	H	H	A	H	H	H	H	B	H	B	B	H	B	H	H	H	A	H	A	A	A	H	-
3146	A01	9812789	H	A	H	H	H	-	H	H	B	H	A	B	H	H	B	-	H	A	H	A	H	B	H	H	H	H	A	H	H	H	H	B	H	-	B	H	-	H	H	H	A	H	A	A	A	H	A
3174	A02	10118331	H	H	B	H	B	B	B	A	H	H	A	B	A	H	A	H	B	H	B	H	H	B	H	H	A	H	H	H	H	A	H	H	A	A	H	H	H	H	B	H	H	H	H	A	A	H	B
3175	A02	10128649	H	H	B	H	B	B	B	A	H	H	A	B	A	H	A	H	B	H	B	H	H	B	H	H	A	H	H	H	H	A	H	H	A	A	H	H	H	H	-	H	H	H	H	A	A	H	B
3184	A02	10230832	-	H	-	H	B	B	-	A	H	H	-	B	A	-	A	H	B	H	B	A	H	B	H	H	A	H	-	-	H	A	H	H	A	A	H	H	H	H	B	H	H	H	H	A	A	H	B
3198	A02	10294249	H	H	B	H	B	B	B	A	H	H	A	B	A	H	A	H	B	H	-	A	H	B	H	H	A	H	H	H	H	A	H	H	A	A	H	H	H	H	B	H	H	H	H	A	A	H	B
3202	A02	1031218	A	-	H	B	H	B	H	H	B	H	A	B	A	A	H	H	H	B	A	B	-	-	A	H	H	A	H	H	A	A	H	H	A	A	B	H	H	H	H	B	B	H	B	H	H	H	B
3206	A02	10349249	H	H	B	H	-	-	B	A	H	H	-	-	-	H	A	H	B	H	-	-	H	-	H	H	A	H	-	H	H	A	H	H	A	A	H	H	H	H	B	H	H	H	-	A	A	H	-
3209	A02	10392590	H	H	B	H	B	B	B	-	H	H	-	B	A	H	A	H	B	H	-	A	H	B	H	H	A	H	H	H	H	-	H	H	A	A	H	H	H	H	B	H	H	H	H	A	-	H	B
3214	A02	10496147	H	H	-	H	B	B	-	A	H	H	A	B	-	H	-	H	B	H	-	A	H	B	H	-	-	H	H	H	H	A	H	H	A	A	H	H	-	H	B	H	H	H	H	A	A	H	B
3240	A02	10721977	H	H	B	H	B	B	B	A	H	H	A	B	A	H	A	-	B	H	B	A	H	B	H	H	A	H	H	H	H	A	H	H	A	-	H	H	H	H	B	H	H	H	H	A	A	H	B
3244	A02	10766001	H	H	B	H	B	B	B	A	H	-	A	B	A	H	A	H	B	H	B	A	H	B	H	H	-	H	H	H	H	A	H	H	A	-	H	H	H	H	B	H	H	H	H	A	A	H	B
3249	A02	10798730	H	H	B	H	B	B	B	A	H	H	A	B	A	H	A	H	B	H	B	A	H	B	H	H	A	H	H	H	H	A	H	H	A	A	H	H	H	H	B	H	H	H	H	A	A	H	B
3251	A02	10799210	H	H	B	H	B	B	B	A	H	H	A	B	A	H	A	H	B	H	B	A	H	B	H	H	A	H	H	H	H	A	H	H	A	A	H	H	H	H	B	H	H	H	-	A	A	H	B
3252	A02	10802416	H	H	B	H	B	B	B	A	H	H	A	B	A	H	-	H	B	H	B	A	H	B	H	H	A	H	H	H	H	A	H	H	A	A	H	H	H	H	B	H	H	H	H	A	A	H	-
3254	A02	10809763	H	H	B	H	B	B	B	A	H	H	A	B	A	H	A	H	B	H	B	A	H	B	H	H	A	H	H	H	H	A	H	H	A	A	H	H	H	H	B	H	H	H	H	-	A	H	B
3267	A02	109844	A	H	H	B	H	B	H	H	B	H	H	B	A	A	H	H	H	B	A	-	A	B	-	H	H	A	H	H	H	A	H	H	A	B	B	H	H	H	H	B	B	A	H	H	H	H	H
3273	A02	11008152	H	H	-	H	-	B	B	-	H	-	-	-	A	H	-	H	B	H	B	-	H	-	H	H	-	H	H	H	H	A	H	H	A	A	H	H	H	H	B	H	-	H	H	A	A	H	B
3277	A02	11091035	H	H	-	H	B	-	B	A	H	H	A	B	A	H	A	H	-	H	-	A	H	B	H	H	A	H	H	H	H	A	H	H	A	A	H	H	H	H	B	H	H	H	H	A	A	H	B
3281	A02	11114347	H	H	B	H	B	B	B	A	H	H	A	B	A	H	A	H	B	H	B	A	H	B	H	H	A	H	H	H	H	A	H	H	A	A	H	H	H	H	B	H	H	H	H	A	A	H	B
3284	A02	11152111	H	H	B	H	B	B	B	A	H	H	A	B	A	H	A	H	B	H	B	A	H	B	H	H	A	H	H	H	H	A	H	H	A	A	H	H	H	H	B	H	H	H	H	A	A	H	B
3286	A02	11156004	H	H	B	H	B	B	B	A	H	H	A	B	-	H	A	H	B	H	B	A	H	B	H	-	A	H	H	H	H	A	H	H	A	A	H	H	H	H	B	H	H	H	H	A	A	H	B
3290	A02	11183609	H	H	B	H	B	B	B	A	H	H	A	B	A	H	A	H	B	H	B	A	H	B	H	H	A	H	H	H	H	A	H	H	A	A	H	H	H	H	B	H	H	H	H	A	A	B	B
3299	A02	11248737	H	H	B	H	B	B	B	A	H	H	A	B	A	H	A	H	B	H	B	A	H	B	H	H	A	H	H	H	H	A	H	H	A	A	H	H	H	H	B	H	H	H	H	A	A	B	B
3305	A02	11290484	H	H	B	H	B	B	B	A	H	H	-	-	A	H	-	H	-	-	B	-	H	-	H	H	-	H	H	H	H	-	H	H	-	A	-	H	H	H	B	H	H	-	-	A	A	-	-
3315	A02	11433261	H	H	B	H	B	B	B	A	H	H	-	B	A	H	A	-	B	H	B	A	H	-	H	H	A	H	H	H	H	A	H	H	A	-	H	H	H	H	B	H	H	H	H	A	A	B	B
3332	A02	1159903	A	H	H	-	H	B	H	H	B	H	A	B	A	A	H	H	H	B	A	-	-	B	A	H	H	A	H	H	A	A	H	H	A	A	B	H	H	H	H	B	B	H	B	H	H	H	B
3359	A02	1200458	-	H	H	B	H	B	H	H	B	H	A	B	-	A	H	H	H	B	A	B	A	B	A	-	H	A	H	H	A	A	H	H	A	A	B	H	H	H	H	B	B	H	B	H	H	H	B
3376	A02	12123613	H	H	-	H	B	B	B	A	H	H	A	B	A	H	A	H	B	H	B	-	-	H	H	H	A	H	H	H	H	-	H	A	A	A	H	-	B	H	B	H	H	H	H	A	A	B	B
3393	A02	12320312	H	H	B	H	B	B	B	-	H	H	A	B	A	H	A	H	B	H	B	A	H	H	H	H	A	H	H	H	H	A	H	A	A	A	H	H	B	H	B	H	H	H	H	A	A	B	B
3394	A02	12366858	H	H	B	H	B	B	B	A	H	H	A	B	A	H	A	H	B	H	B	A	H	H	H	H	A	H	H	H	H	A	H	A	A	-	H	H	-	H	B	H	H	H	H	A	A	B	B
3395	A02	12371111	H	H	B	H	B	B	B	A	H	H	-	B	A	H	A	H	B	H	B	A	H	H	H	H	A	H	H	H	H	A	H	A	A	A	H	H	B	H	B	H	H	H	H	A	A	B	B
3396	A02	12371114	H	H	B	H	B	B	B	-	H	H	-	B	A	H	A	H	B	H	B	A	H	H	H	H	A	H	H	H	H	-	H	A	A	-	H	H	B	H	B	H	H	H	H	A	A	B	B
3411	A02	12454999	H	H	B	H	B	B	B	A	H	H	A	B	A	H	A	H	-	H	B	A	H	H	H	A	A	H	H	H	H	A	H	A	A	A	H	H	B	H	B	H	H	H	H	A	A	B	B
3414	A02	12490732	H	H	B	H	B	B	B	A	H	H	A	B	A	H	A	H	B	H	B	A	H	H	-	A	A	H	H	H	H	A	H	A	A	A	H	H	B	H	B	H	H	H	H	A	A	B	B
3415	A02	12502724	H	H	B	H	B	B	B	A	H	H	A	B	A	H	A	H	B	H	B	A	H	H	H	A	A	H	H	H	H	A	H	A	A	A	H	H	B	H	B	H	H	H	H	A	A	B	B
3422	A02	12552084	H	H	-	H	B	B	B	A	H	-	A	B	A	H	A	H	B	H	B	-	H	-	-	A	A	H	H	H	H	A	H	A	A	A	H	H	B	H	B	H	H	H	-	A	A	B	B
3424	A02	1256965	A	H	H	B	H	B	H	H	B	H	A	B	A	-	H	H	H	B	A	B	A	B	A	H	H	A	H	H	A	A	H	H	A	-	B	H	H	H	H	B	H	H	B	H	H	H	B
3425	A02	12576394	H	H	B	H	B	B	B	A	H	H	A	B	A	H	A	H	B	H	B	A	H	H	H	A	A	H	A	H	H	-	H	A	A	A	H	H	B	H	B	H	H	H	H	A	A	B	B
3429	A02	1258290	A	H	H	B	H	B	H	H	B	H	A	B	A	A	H	H	H	B	A	B	-	B	A	H	H	A	H	H	A	A	H	H	A	A	B	H	H	H	H	B	H	H	B	H	H	H	B
3438	A02	126842	A	H	H	B	H	B	H	H	B	H	H	B	A	A	H	H	H	B	-	B	A	B	A	H	H	A	H	H	A	A	H	H	A	B	B	H	H	H	H	B	B	A	H	H	H	H	H
3456	A02	1289272	A	H	H	B	H	B	H	H	B	H	A	B	A	-	H	H	H	B	-	B	A	-	-	H	H	A	H	H	A	A	H	H	A	A	B	H	H	H	H	B	H	H	B	H	H	H	B
3457	A02	12894146	-	H	B	H	B	B	B	-	H	H	A	B	A	H	A	H	-	H	B	A	H	H	H	A	A	H	A	-	-	-	H	A	-	-	H	H	B	H	B	H	H	H	-	-	A	B	B
3463	A02	12960139	H	H	B	H	B	B	B	-	H	H	A	B	A	H	A	H	B	H	B	A	H	H	H	A	A	H	A	H	H	A	H	A	A	A	H	H	B	H	B	H	H	H	H	A	A	B	B
3474	A02	13061625	H	H	B	-	B	B	B	A	H	H	A	B	A	H	A	H	B	H	B	A	H	H	-	A	A	H	A	A	H	A	H	A	A	A	H	H	B	H	B	H	H	H	H	A	A	B	B
3476	A02	13064505	H	H	H	H	H	H	H	-	H	H	H	H	H	H	H	H	H	H	H	H	H	H	H	H	H	H	H	H	H	H	H	H	H	H	H	H	H	H	H	H	H	H	H	H	H	H	H
3478	A02	1309044	A	H	H	B	H	-	H	H	-	H	A	B	A	A	H	H	H	B	-	B	A	B	A	H	H	A	H	H	A	A	H	H	A	-	B	H	H	H	H	-	H	H	B	H	H	H	-
3485	A02	13127214	H	H	-	H	B	B	B	A	H	H	-	B	A	H	-	H	-	H	-	A	H	H	H	A	-	H	A	H	H	-	H	A	-	-	H	H	B	H	B	H	H	H	H	A	A	B	-
3487	A02	1312993	A	H	H	B	H	B	H	H	B	H	A	-	A	A	H	H	H	B	-	-	A	-	A	H	H	A	H	H	A	A	H	-	A	A	B	H	H	H	H	B	H	H	B	H	H	H	-
3499	A02	13220662	H	H	-	H	B	B	B	-	H	H	A	B	A	H	A	H	B	H	B	A	H	-	H	A	A	H	A	-	H	A	H	-	A	-	H	H	B	H	B	H	H	H	H	A	A	B	B
3501	A02	13221059	H	H	B	H	B	B	B	A	H	H	A	B	A	H	A	H	B	H	B	A	H	H	H	A	A	H	A	H	H	-	H	A	-	A	H	H	B	H	-	H	H	-	H	A	A	B	-
3502	A02	13233615	H	H	B	H	B	B	B	A	H	H	A	B	A	H	A	H	B	H	B	A	H	H	H	A	A	H	A	H	H	A	H	A	A	A	H	H	B	H	B	H	H	H	H	A	A	B	B
3503	A02	13260244	H	H	B	H	B	B	-	A	H	H	A	-	A	H	A	H	B	H	B	-	H	H	H	A	A	H	-	H	H	A	H	A	-	A	H	H	-	H	B	H	H	H	H	A	A	B	B
3524	A02	1341440	-	H	H	B	H	B	H	-	B	H	A	-	A	A	H	H	H	B	A	-	A	B	-	H	H	-	H	H	A	-	H	H	A	A	-	H	H	H	H	B	H	H	B	H	H	H	B
3528	A02	13434202	A	H	B	H	H	H	B	A	H	B	B	H	B	A	-	H	H	A	A	H	H	H	A	B	A	H	H	H	H	H	A	-	H	A	H	H	A	A	H	A	B	B	-	H	H	B	B
3535	A02	13452634	H	H	B	H	B	B	B	A	-	H	A	-	A	H	A	H	B	H	B	A	H	H	H	A	A	H	A	H	H	A	H	A	A	-	H	H	B	H	B	H	H	H	H	-	A	B	B
3550	A02	13543435	H	H	B	H	B	B	B	A	H	H	A	B	A	H	A	H	B	H	B	A	-	H	H	A	A	H	A	H	H	A	H	A	A	A	H	H	B	H	B	H	H	H	H	A	A	B	B
3561	A02	13605560	H	H	B	H	B	B	-	A	H	B	A	B	A	H	A	H	B	H	B	A	H	H	H	A	A	H	A	H	H	A	H	A	A	A	H	H	B	H	B	H	H	H	H	A	A	B	B
3580	A02	13705427	H	H	B	H	B	-	B	A	H	H	A	B	A	H	A	H	B	H	B	A	H	A	H	A	A	H	A	H	H	A	H	A	A	A	H	H	-	H	B	H	H	H	H	A	A	B	B
3589	A02	13743311	H	H	B	H	B	B	B	A	H	H	A	B	A	H	A	H	B	H	B	A	H	A	H	A	A	H	A	H	H	A	H	A	A	A	H	H	B	H	B	H	H	H	H	A	A	B	B
3592	A02	13808625	H	H	-	H	B	B	B	A	H	H	A	B	A	H	-	H	-	H	B	A	H	-	H	A	-	H	A	H	H	A	H	A	A	A	H	H	B	H	B	H	H	H	-	A	A	B	B
3594	A02	13811020	H	H	B	H	B	B	-	A	H	H	A	-	A	H	A	H	B	H	B	A	H	A	H	A	A	-	-	H	H	A	H	A	A	A	H	H	B	H	B	H	H	H	H	A	A	B	-
3616	A02	14060627	A	H	B	H	H	H	B	A	H	B	B	B	B	A	A	H	H	A	A	H	H	H	A	B	A	-	H	H	H	H	A	-	H	A	H	H	A	A	H	A	B	B	H	H	-	B	-
3618	A02	14090433	H	H	-	H	H	B	B	A	H	H	A	B	A	H	A	H	B	H	B	A	-	A	H	-	A	H	A	H	H	A	H	A	A	A	H	H	B	H	B	H	H	H	H	A	A	B	B
3663	A02	14327689	H	H	B	H	H	B	B	A	H	H	A	B	A	H	-	H	B	H	B	A	H	A	H	A	A	H	A	H	H	A	H	A	A	A	H	H	B	H	B	H	B	H	H	A	A	B	B
3666	A02	14330526	H	H	B	H	-	B	-	A	H	H	A	B	-	H	A	H	B	H	B	A	H	A	H	A	A	H	A	H	H	A	H	A	A	-	H	H	B	H	-	H	B	-	H	A	A	B	B
3667	A02	14331365	H	H	B	H	H	B	B	A	-	H	A	B	A	H	A	H	B	H	B	A	H	A	H	A	A	H	A	H	H	A	H	A	A	A	H	H	B	H	B	H	B	H	H	A	A	B	B
3675	A02	14383073	H	H	B	H	H	B	B	A	H	H	-	B	-	H	-	H	B	H	B	A	H	A	H	A	A	H	A	H	H	A	H	A	A	A	H	H	B	H	B	H	-	H	H	A	A	B	-
3680	A02	14449162	H	H	B	H	H	B	B	A	H	H	A	B	A	H	A	H	-	H	-	A	H	A	H	A	A	H	A	H	H	A	H	A	A	A	H	H	B	H	B	H	B	H	H	A	A	B	B
3684	A02	14516274	H	H	B	H	H	B	B	A	H	B	-	B	A	H	A	H	B	H	B	A	H	A	H	A	A	H	A	H	H	A	A	A	A	A	H	H	B	H	B	H	B	H	H	A	A	B	B
3685	A02	14516277	H	H	B	H	H	B	B	A	H	B	A	B	A	H	A	H	B	H	B	A	H	A	H	A	A	H	A	H	H	A	A	A	A	-	H	H	B	H	B	H	B	H	H	A	A	B	B
3703	A02	14700383	H	H	H	H	H	B	B	A	H	B	A	B	A	H	A	H	B	H	B	A	H	A	H	H	A	H	A	H	H	A	A	A	A	A	H	H	B	H	-	H	B	H	H	A	A	B	B
3721	A02	14819815	H	H	H	H	H	B	B	-	H	B	A	B	A	H	-	H	B	H	B	A	H	A	H	H	A	H	A	H	H	A	A	A	A	-	H	H	B	H	-	H	-	H	H	A	A	B	B
3728	A02	14866826	H	H	H	H	H	B	B	A	H	B	A	B	A	H	A	H	B	H	B	A	H	A	H	H	A	H	A	H	H	A	A	A	A	A	H	H	B	H	B	H	B	H	H	A	A	B	B
3768	A02	15097969	H	H	H	H	H	B	B	A	H	H	A	B	A	H	A	H	B	H	B	A	H	-	H	H	A	H	A	H	H	A	A	A	A	A	H	A	B	H	B	H	B	H	H	A	A	B	B
3770	A02	15120896	H	H	H	H	H	B	B	A	H	B	A	B	A	H	A	H	B	H	-	A	H	A	H	H	A	H	A	H	H	A	A	A	A	-	H	A	B	H	B	H	B	H	H	A	A	B	B
3771	A02	15120899	H	H	H	H	H	B	B	-	H	B	A	B	A	H	A	H	B	H	B	A	H	A	H	H	A	H	A	H	H	A	A	A	A	A	H	A	B	H	B	H	B	H	H	A	A	B	B
3776	A02	15158389	H	H	H	H	H	B	B	A	H	B	A	-	A	H	A	H	B	H	B	A	H	A	H	H	A	H	A	H	H	A	A	A	A	A	H	A	B	H	B	H	B	H	H	-	A	B	B
3817	A02	15626494	H	H	H	H	H	B	B	A	H	B	A	B	A	H	A	H	-	H	B	A	H	A	H	H	A	H	A	H	H	A	A	A	A	A	H	A	B	-	-	H	B	H	H	A	A	B	B
3837	A02	15784864	H	H	H	H	H	B	B	A	H	B	A	B	A	H	A	B	H	H	B	A	H	A	H	H	A	H	A	H	H	A	A	A	A	A	H	-	B	H	B	H	B	H	-	A	A	B	B
3859	A02	15999831	H	H	H	H	H	B	B	A	H	B	A	B	A	H	A	H	H	H	B	A	H	A	H	H	A	H	A	H	H	A	A	A	A	A	H	A	B	H	B	H	B	H	H	A	A	B	B
3878	A02	1615159	A	H	H	B	H	B	H	H	B	H	A	B	A	A	H	H	H	B	A	B	A	B	A	H	H	A	H	H	A	A	H	H	A	A	B	H	H	H	H	B	H	H	B	H	H	H	B
3905	A02	1639803	A	H	H	B	H	B	H	H	B	H	A	B	A	A	H	-	H	B	A	B	A	B	A	H	H	A	H	H	A	A	H	H	A	A	B	H	H	H	H	B	H	H	B	H	H	H	B
3907	A02	1642304	A	-	H	B	H	B	H	H	B	H	A	B	A	A	H	H	H	B	A	B	-	B	A	H	H	A	-	H	A	A	H	H	A	A	B	H	H	H	H	B	H	H	B	H	H	H	B
3908	A02	1642307	A	H	H	B	H	B	H	H	B	H	A	B	A	A	H	H	H	B	A	B	A	B	A	H	H	A	H	H	-	-	H	H	A	-	B	H	H	H	H	B	H	H	B	H	H	H	B
3916	A02	16482000	H	H	H	H	H	B	-	A	H	B	A	B	A	H	A	H	-	H	B	A	H	A	H	H	A	H	A	H	H	A	A	A	A	A	H	A	B	H	B	H	B	H	H	A	A	-	B
3919	A02	16488544	H	H	H	H	H	B	B	A	H	-	A	B	A	H	A	H	H	H	B	A	-	-	H	H	A	H	A	H	H	A	-	A	A	-	H	A	B	H	B	H	B	H	H	A	A	-	B
3947	A02	16788468	H	H	H	H	H	B	B	A	H	B	A	B	A	H	A	H	H	H	B	A	H	A	H	H	A	H	A	H	H	A	A	A	A	A	H	A	B	H	B	H	B	H	H	A	A	B	B
3952	A02	1683643	A	H	H	B	H	-	H	H	-	H	A	B	A	A	H	H	H	B	A	B	A	-	A	H	H	A	H	H	A	-	H	H	A	-	B	H	H	H	H	B	H	H	B	H	H	H	B
3955	A02	1685346	A	H	H	B	H	B	H	H	B	H	A	B	A	A	H	H	H	B	A	B	A	B	A	H	H	A	H	H	A	A	H	H	A	A	B	H	H	H	H	B	H	H	B	H	H	H	B
3958	A02	16859471	H	H	H	H	H	B	B	-	H	B	A	-	A	H	A	H	H	H	B	A	H	A	H	H	A	H	A	H	H	A	A	A	A	A	H	H	B	H	B	H	B	H	H	A	A	B	B
3961	A02	16867513	H	H	H	H	H	B	-	-	H	B	A	B	A	H	A	H	H	H	B	-	H	A	H	H	A	H	A	H	H	A	A	A	A	-	H	A	B	-	B	H	-	H	H	A	A	B	B
4170	A02	18495751	H	H	H	H	H	B	B	A	H	B	A	H	A	H	A	H	H	H	B	A	H	A	H	H	A	H	A	H	H	A	A	A	A	A	H	A	B	H	B	H	B	H	H	A	A	B	B
4245	A02	19050335	A	A	A	A	A	A	A	A	A	-	A	A	A	-	A	A	A	A	A	A	A	A	A	A	-	A	A	A	-	A	A	A	A	A	A	-	A	A	A	A	A	A	A	A	A	A	A
4272	A02	19239737	H	H	H	H	H	B	B	A	H	B	-	H	A	H	-	H	H	H	B	A	H	A	H	H	A	H	A	H	H	H	A	A	A	A	H	A	B	H	B	H	B	H	H	A	-	-	B
4275	A02	1927313	A	H	H	B	H	B	H	H	B	H	A	B	A	A	H	H	B	B	-	B	-	B	-	H	H	A	H	H	-	A	H	H	A	A	B	H	H	H	H	B	H	H	B	H	H	H	B
4277	A02	19303950	H	H	H	H	H	H	H	H	-	H	H	H	H	H	-	H	H	H	H	H	H	H	H	H	-	H	H	H	H	H	H	H	-	H	H	A	H	H	H	H	H	H	H	H	H	H	H
4301	A02	19599	A	H	H	B	H	-	H	H	B	H	H	-	A	A	H	H	H	B	A	B	A	-	-	H	H	A	H	H	H	A	H	H	A	B	B	H	H	H	H	B	-	-	H	H	-	H	H
4311	A02	19668999	H	H	H	H	H	B	B	-	H	B	A	H	A	H	A	H	H	H	-	A	-	A	H	H	A	H	A	H	H	H	-	A	A	A	H	-	-	H	B	H	B	H	A	A	A	B	B
4331	A02	1983643	A	H	H	B	H	B	H	H	B	H	A	B	A	A	H	H	B	B	A	B	A	B	A	H	H	A	H	H	A	A	H	H	-	A	B	H	H	H	H	B	H	H	B	H	H	H	B
4372	A02	20237578	H	A	H	H	H	B	H	-	H	H	A	H	H	H	H	A	A	A	H	A	H	H	H	H	H	H	A	H	H	H	H	H	H	H	H	-	B	H	H	H	A	H	A	A	A	H	A
4383	A02	20358298	H	H	H	H	H	B	B	-	H	B	A	H	A	H	A	H	H	H	B	A	H	A	H	H	A	H	A	H	H	H	A	-	A	H	H	A	B	H	B	H	B	H	A	A	A	B	B
4386	A02	20400790	H	H	H	H	H	B	B	A	H	B	A	H	A	H	H	H	H	H	B	A	H	A	H	H	A	H	A	H	H	H	A	A	A	H	H	A	B	H	B	H	H	H	A	A	A	B	-
4389	A02	20404161	H	A	A	B	B	A	B	H	A	B	B	B	A	A	A	H	A	B	B	-	-	B	-	-	B	H	H	A	H	B	H	H	B	A	A	B	A	A	H	B	A	H	A	A	B	H	B
4399	A02	20495208	H	H	H	H	H	B	-	A	H	B	A	H	A	H	H	H	H	H	B	A	H	A	H	H	A	H	A	H	H	H	A	A	A	H	H	A	B	H	B	H	H	H	A	A	A	B	B
4489	A02	21231625	H	H	H	H	H	B	B	H	H	B	A	H	A	H	H	H	H	H	B	A	H	A	H	H	A	H	A	H	H	H	-	A	A	H	H	A	B	B	-	-	H	H	A	A	A	B	B
4490	A02	21240593	H	H	-	H	H	B	B	H	H	-	A	H	-	H	H	H	H	H	B	A	H	A	H	H	A	H	-	H	H	H	A	A	-	H	H	A	B	-	B	H	H	H	A	A	A	B	B
4527	A02	21494091	B	H	H	H	A	B	H	A	H	A	H	H	H	A	B	A	H	H	H	B	A	H	H	B	A	B	H	B	A	B	B	H	H	A	A	H	A	B	H	H	A	H	H	A	H	A	B
4545	A02	21646809	H	H	H	H	H	B	B	H	H	-	-	H	A	H	H	H	H	H	B	A	H	A	H	H	A	H	A	H	H	H	A	A	A	H	H	A	B	B	-	B	H	H	A	A	A	B	B
4550	A02	21653300	H	H	H	H	H	B	B	H	H	B	A	H	A	H	H	H	H	H	B	A	H	A	H	H	A	H	A	H	H	H	A	A	A	H	H	A	B	B	B	B	H	H	A	-	A	B	-
4554	A02	21662827	-	H	H	H	H	-	-	H	H	B	A	H	A	H	H	H	H	H	B	A	H	-	H	H	A	H	A	H	H	H	-	A	A	H	H	A	B	B	-	-	H	H	A	A	A	-	B
4561	A02	21718034	H	H	H	H	H	B	B	H	H	B	A	H	A	H	H	H	H	H	B	A	H	A	H	H	A	H	A	H	H	H	-	A	A	H	H	A	B	B	B	B	H	H	A	A	A	B	B
4566	A02	21759497	H	H	H	H	H	B	B	H	H	B	A	H	A	H	H	H	H	H	B	A	H	A	H	H	A	H	A	H	H	-	A	A	A	H	H	A	B	B	B	B	H	H	A	A	A	B	B
4568	A02	21846407	H	H	H	H	B	B	B	H	H	-	A	H	A	H	H	H	H	H	B	A	H	A	H	H	A	H	A	H	H	H	A	A	A	H	H	A	B	B	B	B	H	H	A	A	A	B	B
4597	A02	22100683	H	H	H	H	B	B	B	H	H	B	A	H	A	H	H	H	H	H	B	A	H	A	H	H	A	H	A	H	H	H	A	A	A	H	H	A	B	B	B	B	H	H	A	A	A	-	B
4605	A02	22131209	H	H	H	H	B	B	B	H	H	B	A	H	A	H	H	H	H	H	B	A	H	A	H	H	A	H	A	H	H	H	A	A	A	H	H	A	B	B	B	B	A	H	A	A	A	B	B
4624	A02	22244644	H	H	H	H	B	B	-	H	H	B	A	H	A	H	H	H	H	H	B	A	H	-	H	H	A	H	A	H	H	H	A	A	A	H	H	A	B	-	B	B	-	H	A	H	A	B	B
4629	A02	2227672	A	H	H	-	H	B	H	H	B	-	A	B	A	A	H	H	B	-	A	B	-	-	A	H	H	A	H	H	A	-	H	H	-	A	B	H	-	H	H	B	H	H	-	H	H	H	B
4631	A02	2228329	-	-	H	B	H	B	H	H	B	H	A	-	A	A	H	H	B	B	A	B	A	B	A	H	H	A	H	H	A	A	H	H	A	A	B	H	H	H	H	B	H	H	B	H	H	H	B
4632	A02	2228842	A	-	H	B	H	B	H	H	B	H	A	B	A	A	H	H	B	B	-	B	A	B	A	H	H	A	H	H	A	-	H	H	A	A	B	H	H	H	H	B	H	H	B	H	H	H	B
4633	A02	2228845	A	H	H	B	H	B	H	H	B	H	A	B	A	A	H	H	B	B	A	B	A	B	A	H	H	A	H	H	A	A	H	H	A	A	B	H	H	H	H	B	H	H	B	H	H	H	B
4634	A02	2229301	-	H	H	-	H	B	H	H	B	H	A	B	A	A	H	H	B	-	-	B	A	B	-	H	H	A	H	H	-	A	H	H	A	A	B	H	H	H	H	B	H	H	B	H	H	-	B
4655	A02	22480456	H	H	-	H	B	B	B	H	-	B	A	H	A	-	-	H	H	H	B	-	H	A	H	H	A	-	A	H	H	H	A	A	A	H	H	A	B	-	B	B	-	H	-	H	A	B	B
4656	A02	22480459	H	-	H	H	B	B	B	H	H	B	A	H	A	B	H	H	H	H	B	A	H	A	H	H	A	H	A	H	H	H	A	A	A	H	H	A	B	B	B	B	A	H	A	H	A	B	B
4658	A02	22481323	B	B	H	B	B	B	B	H	H	B	-	H	A	B	-	H	H	H	B	-	H	A	H	H	A	H	A	-	H	-	A	A	A	A	B	-	B	B	B	B	-	-	A	H	-	B	B
4664	A02	2252615	A	H	H	B	H	B	H	H	H	H	A	B	A	A	H	H	B	B	A	B	H	-	A	-	H	A	H	-	A	A	H	H	A	H	B	H	H	H	H	B	H	H	B	A	H	H	B
4713	A02	22931351	-	H	H	B	B	B	B	A	H	B	-	H	A	B	H	H	H	H	B	A	H	A	B	H	A	H	A	H	H	H	A	A	A	H	H	A	B	B	B	B	A	H	A	H	A	B	B
4725	A02	2298943	A	H	H	-	H	B	H	H	B	H	A	B	A	-	H	H	B	B	A	B	A	B	A	H	H	A	H	H	A	A	H	H	A	A	B	H	H	H	H	B	H	H	B	A	H	H	B
4730	A02	22994020	H	H	H	B	A	H	H	H	A	A	B	H	A	B	H	H	H	B	B	H	H	H	H	H	B	H	A	A	A	H	H	A	A	H	B	H	H	H	H	H	B	H	B	B	H	A	B
4731	A02	22996429	H	H	H	B	A	H	H	H	A	-	B	H	A	B	H	H	H	B	B	H	H	H	H	H	B	H	A	A	A	H	H	A	A	H	B	H	H	H	H	H	B	H	B	B	H	A	B
4732	A02	22996432	H	H	H	B	A	H	H	H	A	A	B	H	A	B	H	H	H	B	B	H	H	H	H	H	B	H	A	A	A	H	H	A	A	H	B	H	H	H	H	H	B	H	B	B	H	A	B
4735	A02	23011774	H	H	H	B	B	B	B	H	H	B	-	H	A	B	H	H	H	H	B	A	H	A	B	H	A	H	-	H	H	H	A	A	A	H	H	A	B	B	B	B	A	H	A	H	A	B	B
4742	A02	23066866	H	H	H	A	H	A	H	A	H	H	H	H	H	A	H	A	-	A	H	-	H	A	H	H	A	H	-	H	H	H	-	H	H	H	A	H	H	H	H	H	H	A	A	-	A	H	H
4793	A02	23627963	H	H	H	B	B	B	B	H	H	B	A	H	H	B	H	H	H	H	B	A	H	A	B	H	A	H	A	H	H	H	A	A	A	H	H	A	B	B	B	-	A	H	A	H	A	B	B
4802	A02	23670037	H	H	H	B	B	B	B	H	H	B	A	H	H	-	H	H	H	H	B	A	H	-	-	H	A	H	A	H	H	H	A	A	A	H	H	A	B	B	B	B	A	H	A	H	A	B	B
4807	A02	23690212	H	H	H	-	B	B	B	H	H	B	A	H	H	B	H	H	H	H	B	A	H	A	B	-	A	H	A	H	H	H	A	-	-	H	H	A	B	B	B	B	A	H	A	H	A	B	B
4826	A02	23859478	-	-	H	H	-	A	H	H	H	A	A	A	A	H	H	-	H	H	H	H	H	H	-	H	H	H	H	H	H	H	-	-	-	H	A	H	A	H	-	H	A	A	H	-	A	-	A
4827	A02	23867881	H	H	H	B	B	B	B	H	H	B	A	H	H	B	H	H	H	H	-	A	H	A	B	H	A	H	A	H	H	H	A	A	A	H	H	A	B	B	B	B	A	H	A	B	A	B	B
4844	A02	24007897	H	H	H	B	B	B	B	H	B	B	A	H	H	-	H	H	H	H	B	A	H	A	B	H	A	H	A	H	H	H	A	A	A	H	H	A	B	B	B	B	A	H	A	B	A	B	H
4846	A02	24015777	H	H	H	B	B	B	B	H	B	B	A	H	H	B	H	H	H	H	B	A	H	A	B	H	A	H	A	H	H	H	A	A	A	H	H	A	B	B	B	B	A	H	A	B	A	B	H
4847	A02	24015780	H	H	H	B	B	B	B	H	B	-	A	H	H	B	H	H	H	H	B	A	H	A	B	H	A	H	A	H	H	H	A	A	A	H	H	A	B	B	B	-	A	H	-	B	A	B	H
4848	A02	24016239	H	H	-	B	B	B	B	H	B	B	A	H	H	B	H	H	H	H	B	A	H	A	B	H	-	H	A	H	H	H	A	A	A	H	H	A	B	B	B	B	A	H	A	B	A	B	H
4860	A02	2405000	A	H	A	H	H	H	B	A	H	A	B	H	A	B	A	A	H	A	A	B	H	H	A	-	A	B	B	H	H	B	H	A	A	A	H	A	A	H	H	A	H	B	H	H	H	H	A
4862	A02	24085356	H	B	H	B	A	A	H	-	H	H	H	H	A	A	A	A	H	A	A	A	A	A	-	A	A	A	B	A	A	A	A	H	-	A	A	H	B	A	A	A	H	A	A	H	A	A	A
4880	A02	24208450	H	H	H	B	B	B	B	H	B	B	A	H	H	B	H	H	H	H	B	A	-	H	B	H	A	H	A	H	H	H	A	A	A	H	H	A	B	B	B	B	A	H	A	B	A	-	H
4889	A02	24312300	H	H	H	B	B	B	B	H	B	B	A	H	H	B	H	H	H	H	B	A	H	H	B	H	A	H	A	H	H	H	A	A	A	H	H	A	B	B	B	-	A	H	A	B	A	B	H
4893	A02	24375746	H	H	H	B	B	B	B	H	B	B	A	H	H	B	H	H	H	H	-	A	H	H	B	H	-	H	A	H	H	H	A	A	A	H	H	A	B	B	B	B	A	H	A	B	A	B	H
4912	A02	24647872	H	H	H	B	-	B	B	H	B	B	A	H	H	B	H	H	H	H	B	A	H	H	B	H	A	H	A	H	H	H	A	A	A	H	H	A	B	B	B	B	A	H	A	B	A	B	H
4914	A02	24652448	H	H	H	B	B	B	B	H	B	B	A	H	H	B	H	H	H	H	-	A	H	H	B	H	A	H	A	H	H	H	A	A	A	H	H	A	B	B	B	-	A	H	A	B	A	B	H
4919	A02	24666318	H	H	H	B	B	B	B	H	B	-	A	H	H	B	H	H	H	H	B	-	H	-	-	H	-	H	-	H	H	H	A	A	-	H	H	A	-	-	B	-	-	H	-	-	-	-	H
4933	A02	2488826	A	H	H	-	H	B	H	H	H	H	A	B	A	A	H	H	-	B	H	B	A	-	A	H	H	A	H	H	A	A	H	H	A	A	B	H	H	H	H	B	H	H	H	A	H	H	B
4945	A02	24996594	H	H	-	B	B	B	-	H	B	B	-	H	H	B	H	H	H	H	-	A	H	H	-	H	-	-	-	H	-	-	A	-	A	H	-	A	B	B	B	-	-	H	A	-	-	B	H
4946	A02	25020204	H	H	H	B	B	B	B	H	B	B	A	H	H	B	H	H	H	H	B	A	H	B	B	H	A	H	A	H	-	H	A	A	A	H	H	A	B	B	B	B	A	H	A	B	A	B	H
4947	A02	25020779	H	H	H	B	B	B	B	H	B	B	A	H	H	B	H	H	H	H	B	A	H	-	B	H	A	H	A	H	A	H	-	A	-	H	H	-	B	B	B	-	-	H	A	-	A	-	H
4958	A02	25176912	A	H	H	H	B	H	B	A	H	A	B	H	A	B	A	A	H	A	A	B	H	H	A	B	A	B	B	H	H	B	H	A	A	A	H	A	A	H	H	A	H	B	H	H	H	H	A
4967	A02	25346234	A	H	H	B	B	B	B	H	B	B	A	H	H	H	H	H	H	H	B	-	H	B	B	H	A	H	A	B	H	H	A	A	-	H	H	A	B	-	B	B	A	H	A	B	A	B	H
4971	A02	25413249	A	H	H	B	B	B	B	H	B	B	A	H	H	H	H	H	H	H	B	B	H	B	B	H	A	H	A	B	H	H	A	A	A	H	H	A	B	B	B	-	A	H	A	B	A	B	H
4979	A02	25454580	A	H	H	B	B	B	B	H	B	B	A	H	H	H	H	H	H	H	B	B	-	B	B	H	A	H	A	B	H	H	A	A	A	H	H	A	B	B	B	B	A	H	A	B	A	B	H
4983	A02	25474827	A	H	H	B	B	B	B	H	B	-	A	H	H	H	H	H	H	H	B	B	H	B	-	H	A	H	A	-	H	H	A	A	A	H	H	A	B	B	-	B	A	H	-	B	A	B	H
4985	A02	25475341	A	H	H	B	B	B	B	H	B	B	A	H	H	H	H	-	H	H	B	B	H	B	B	H	A	H	A	B	H	H	A	A	A	H	H	A	B	B	B	-	A	H	A	B	A	B	H
4989	A02	25485162	A	H	H	B	B	B	B	H	B	-	A	H	H	H	H	H	H	H	B	B	H	B	B	H	A	H	A	B	H	H	-	A	A	H	H	A	-	B	-	B	A	H	-	B	A	B	H
5006	A02	2562149	-	H	H	B	H	B	H	H	H	H	A	B	A	A	H	H	B	B	H	B	A	B	A	H	-	A	H	H	A	A	H	H	A	-	B	H	H	H	H	B	H	H	H	A	H	H	B
5023	A02	25770847	A	-	H	B	B	B	B	H	B	B	A	H	H	H	H	H	H	H	B	-	H	B	-	H	A	H	A	-	H	H	A	-	A	H	H	A	B	B	B	-	A	H	A	B	A	B	H
5028	A02	25793	A	H	H	B	H	B	H	H	B	H	H	B	A	A	H	H	H	B	A	B	A	B	A	H	H	A	H	H	H	A	H	H	A	B	B	H	H	H	H	B	B	A	H	H	H	H	H
5034	A02	25849975	A	-	H	-	B	B	B	-	B	-	A	H	H	H	H	H	H	H	-	B	H	-	B	H	A	H	A	B	H	-	A	A	-	H	H	A	B	B	B	B	-	H	A	-	-	B	H
5035	A02	25850559	A	H	H	-	B	-	-	H	B	B	A	H	H	H	H	H	H	H	B	B	H	B	B	H	A	H	A	B	H	H	A	A	A	H	H	A	B	B	B	B	A	H	A	B	A	B	H
5040	A02	25884021	A	H	H	B	H	B	B	H	B	B	A	H	H	H	H	H	H	H	B	B	H	B	B	H	A	H	A	B	H	H	A	A	A	H	H	A	B	B	B	B	A	H	A	B	A	B	H
5041	A02	2589036	A	H	H	-	H	B	H	H	H	H	A	B	A	A	H	H	B	B	H	B	A	B	A	H	-	A	H	H	A	A	H	H	A	A	B	H	H	H	H	B	H	H	H	A	H	H	B
5044	A02	25896481	A	H	H	B	H	B	B	H	B	-	A	H	H	H	H	H	H	H	B	B	H	B	B	H	A	H	A	B	H	H	A	A	A	H	H	A	B	B	B	B	-	H	A	B	A	-	H
5081	A02	26183584	-	H	H	B	H	B	H	H	B	-	-	-	H	H	H	H	H	H	B	B	H	B	-	H	A	H	A	B	H	-	A	A	A	H	-	A	B	B	-	B	A	H	A	B	A	B	H
5092	A02	26270326	A	H	H	H	H	B	H	H	-	-	A	H	H	H	H	H	-	H	B	-	H	B	-	H	A	H	A	B	H	H	-	A	A	H	H	A	B	B	B	B	-	H	A	B	A	B	H
5094	A02	26281402	A	H	H	-	H	B	A	H	B	B	A	H	H	H	H	H	H	H	B	B	H	B	B	H	A	H	A	B	H	H	A	A	A	H	H	A	B	B	B	B	-	H	A	B	A	B	H
5112	A02	26396495	A	H	H	H	H	B	A	H	B	B	A	H	H	H	H	H	H	H	B	B	H	B	B	H	A	B	A	B	H	H	A	A	A	H	H	A	B	-	B	B	A	H	A	B	A	B	H
5125	A02	26527504	H	H	H	B	-	B	B	A	H	-	H	H	H	-	H	H	H	H	B	H	A	H	-	H	A	H	H	H	A	H	H	H	H	A	A	H	-	B	B	-	A	H	H	-	H	B	B
5133	A02	26590538	A	H	H	H	H	B	A	H	B	B	A	H	H	H	H	H	H	H	B	-	H	B	B	H	A	B	A	B	H	H	A	A	A	H	H	A	B	B	B	B	A	H	A	-	A	B	H
5181	A02	2717430	A	H	H	B	H	B	H	H	H	H	A	B	A	A	H	H	B	B	H	-	A	B	A	H	H	A	H	H	A	A	H	H	A	A	B	H	H	H	H	B	H	H	H	A	H	H	B
5204	A02	2791597	A	H	H	B	H	B	H	H	H	H	A	B	A	A	H	H	-	B	H	B	A	B	A	H	H	A	H	H	A	-	H	-	A	A	B	H	-	H	H	-	H	H	H	-	H	H	B
5211	A02	2844	H	H	H	A	-	H	-	-	H	A	-	H	H	H	-	H	-	A	A	H	-	H	-	H	H	A	H	A	-	H	H	H	H	H	H	H	H	H	H	A	H	H	H	H	H	A	H
5218	A02	2894224	A	H	H	B	H	B	H	H	-	H	-	B	A	A	-	H	B	B	H	B	A	-	A	H	-	A	H	B	A	A	H	H	A	A	B	H	H	H	H	B	H	H	H	A	H	H	B
5236	A02	3033987	A	H	H	B	H	B	H	H	H	H	A	B	A	A	A	H	B	B	H	B	A	B	A	H	H	A	H	B	A	A	H	H	A	A	B	H	H	H	H	B	H	H	H	A	A	H	B
5237	A02	3035812	A	H	H	-	H	-	-	H	H	H	A	-	A	-	-	H	B	B	H	-	A	B	A	H	H	A	H	-	-	-	H	H	-	A	-	-	H	H	H	-	H	H	H	A	-	-	B
5241	A02	3068018	A	H	H	B	H	B	H	H	H	H	A	-	A	A	A	H	-	B	H	B	A	B	A	H	H	-	H	B	A	A	H	H	A	-	-	H	H	H	H	B	H	H	H	-	A	H	-
5242	A02	3076437	-	H	H	B	H	B	H	H	H	H	A	-	-	A	A	H	-	-	H	-	-	-	-	H	H	A	H	-	-	-	H	H	-	-	-	H	H	-	H	-	H	H	H	A	-	H	-
5252	A02	3169428	A	H	H	B	H	B	B	H	H	H	A	B	A	A	A	H	B	B	H	B	A	B	A	H	H	A	H	B	A	A	H	H	A	A	B	H	H	H	H	B	H	H	H	A	A	H	B
5253	A02	3169431	A	H	H	B	H	B	B	H	H	H	-	B	A	A	A	H	B	B	H	B	A	B	A	H	H	A	H	B	A	A	H	H	A	A	B	H	H	H	H	B	H	H	H	A	A	H	B
5270	A02	324272	A	H	H	-	H	B	H	H	-	-	H	B	A	A	H	-	-	B	A	B	A	B	A	H	H	A	H	H	A	A	H	H	A	B	B	H	H	H	H	B	-	A	H	H	H	H	-
5272	A02	329503	A	H	H	B	H	B	H	H	B	H	H	B	A	A	H	H	H	B	-	B	A	B	A	H	H	A	H	H	A	A	H	H	A	B	B	H	H	H	H	B	B	A	H	H	H	H	B
5273	A02	3305256	A	H	H	H	H	B	B	H	H	H	A	B	A	A	A	H	B	B	H	B	A	B	A	H	A	A	H	H	A	A	H	H	A	A	B	H	H	H	B	B	H	H	H	A	A	H	B
5274	A02	3305259	A	H	H	H	H	B	B	H	H	H	A	B	A	A	A	H	B	B	H	B	A	B	A	H	A	A	H	H	A	A	H	H	A	A	B	H	H	H	B	B	H	H	H	A	A	H	B
5275	A02	3306909	A	H	H	H	H	B	B	H	H	H	A	B	A	A	A	H	B	B	H	B	A	B	A	H	A	A	H	H	A	A	H	H	A	A	B	H	H	H	B	-	H	H	H	A	A	H	B
5276	A02	3306912	A	H	H	H	H	B	B	H	H	H	A	B	A	A	A	H	B	B	H	B	A	B	A	H	A	A	H	H	A	A	H	H	A	-	B	H	H	H	B	B	H	H	H	A	A	H	B
5284	A02	3416476	A	H	H	H	H	B	B	H	H	H	A	B	A	A	A	H	B	B	H	B	A	B	A	H	A	A	H	H	A	A	H	H	A	A	B	H	H	H	H	B	H	H	H	A	-	H	-
5295	A02	3478054	A	H	H	H	H	B	-	H	H	H	A	B	A	A	A	H	B	B	H	B	A	B	A	H	A	-	H	H	H	A	H	H	-	A	B	-	H	H	B	B	H	-	H	A	A	H	B
5300	A02	3512943	-	H	H	H	H	B	B	H	H	H	-	B	A	A	A	H	B	B	H	-	A	-	A	H	A	-	H	H	H	A	H	H	A	A	B	H	H	H	B	B	H	H	H	A	A	H	B
5314	A02	358469	A	H	H	B	H	B	H	H	B	H	H	B	A	A	H	H	H	B	A	B	A	B	A	H	H	A	H	H	A	A	H	H	A	B	B	H	H	H	H	B	B	A	H	H	H	H	B
5317	A02	3602962	A	H	H	H	H	B	B	H	H	H	A	B	A	A	A	H	B	B	H	B	A	B	-	H	A	A	H	H	H	A	H	H	A	A	B	H	H	H	B	B	H	H	H	A	A	H	B
5321	A02	3647880	A	H	H	H	H	B	B	H	H	H	A	-	A	A	A	H	B	-	H	B	A	B	A	H	A	A	H	H	H	A	H	H	A	A	B	H	H	H	-	B	H	H	H	A	A	H	B
5349	A02	3923255	A	H	H	H	H	B	B	H	H	H	A	B	A	A	A	H	B	B	H	B	A	B	A	H	A	A	H	H	H	A	H	H	A	A	B	H	H	H	B	B	H	H	H	A	A	H	B
5357	A02	3983319	A	H	H	H	H	B	B	H	H	H	A	B	A	A	A	H	B	B	H	B	A	B	A	H	A	A	H	H	H	A	H	H	A	A	B	H	H	H	B	B	H	H	H	A	A	H	B
5359	A02	4007535	A	H	H	H	H	B	B	H	H	H	A	B	A	A	A	H	B	B	H	B	A	-	A	H	A	A	H	H	H	A	H	H	A	A	B	H	H	H	B	B	H	H	H	A	A	H	B
5377	A02	4123047	-	H	H	H	B	B	B	H	H	H	A	B	A	A	-	H	B	-	H	-	A	B	A	H	A	A	H	H	H	A	H	H	A	A	B	H	H	H	B	B	H	H	H	A	A	H	B
5396	A02	4271345	A	H	H	H	B	B	B	H	H	H	A	B	A	A	A	H	B	B	H	B	A	B	A	H	A	A	H	H	H	A	H	H	A	A	B	H	H	H	B	B	H	H	H	A	A	H	B
5403	A02	4351016	A	H	H	H	B	B	B	H	H	H	A	B	A	A	A	H	B	B	H	-	A	B	-	H	A	A	H	H	H	A	H	H	A	A	B	H	H	H	B	-	H	H	H	A	A	H	B
5412	A02	4424084	A	H	H	H	-	B	B	H	H	H	A	B	A	A	A	H	B	B	H	B	A	B	A	H	A	A	H	H	H	A	H	H	A	A	B	H	H	H	B	B	H	H	H	A	A	H	B
5415	A02	4462957	A	H	H	H	B	B	B	H	H	H	A	B	A	A	A	H	B	B	H	B	A	B	A	H	A	A	H	H	H	A	H	H	A	A	B	H	H	H	B	B	H	H	H	A	A	H	B
5425	A02	4558196	A	H	H	H	-	B	B	H	H	H	A	B	A	A	A	H	B	B	H	B	A	B	A	H	A	A	H	H	H	A	H	H	A	A	B	H	H	H	B	B	H	H	H	A	A	H	B
5427	A02	4577084	-	H	H	H	B	B	B	H	H	H	A	B	A	A	A	H	B	B	H	B	A	-	-	H	A	A	H	H	H	A	H	H	A	A	B	-	H	H	B	-	H	-	H	A	A	H	B
5430	A02	4579120	A	H	H	H	B	B	B	H	H	H	-	B	A	A	-	H	B	-	H	B	-	B	-	H	-	A	H	H	H	A	H	H	A	A	-	H	H	H	B	B	H	H	H	A	-	H	-
5442	A02	4675376	A	H	H	H	B	B	B	H	H	H	A	B	A	A	A	H	B	B	H	B	A	B	A	H	A	A	H	H	H	A	H	H	A	A	B	H	H	H	B	B	H	H	H	A	A	H	B
5467	A02	4854980	A	H	H	H	B	B	B	H	H	H	A	B	A	A	-	H	B	B	B	-	A	B	A	H	A	-	H	H	H	A	H	H	A	A	B	H	H	H	B	-	H	H	H	A	A	H	-
5476	A02	4891902	A	H	H	H	B	B	B	H	H	H	A	B	A	A	A	H	B	B	B	-	A	-	A	H	A	A	H	H	H	A	H	H	A	A	-	H	H	H	B	B	H	H	H	A	A	H	B
5478	A02	4897258	A	H	H	H	-	-	B	H	H	H	A	B	A	A	A	H	B	B	B	B	A	B	A	H	A	A	H	H	H	A	H	H	A	A	-	H	H	H	B	B	H	H	H	A	A	H	B
5516	A02	5136887	A	H	H	H	B	B	B	H	H	H	-	B	A	A	A	H	-	B	B	B	A	-	-	H	A	H	H	-	H	A	H	H	A	A	H	H	H	H	B	B	H	H	H	A	A	-	B
5532	A02	5261932	A	H	H	H	B	B	B	H	H	H	A	B	A	A	-	H	B	B	-	B	A	B	A	H	A	H	H	H	H	-	H	H	A	A	H	-	H	H	B	-	H	H	H	A	-	-	-
5539	A02	5289961	A	H	H	H	B	B	B	H	H	H	A	B	A	A	A	H	B	B	B	B	A	-	A	H	A	H	H	H	H	A	H	H	A	A	H	H	H	H	B	B	H	H	H	A	A	H	B
5553	A02	537893	-	H	H	-	H	B	H	H	B	H	H	-	A	A	H	H	H	-	A	B	-	B	A	H	H	A	H	H	A	A	H	H	A	B	-	H	H	H	H	B	B	A	H	H	H	H	B
5566	A02	5491587	A	H	H	H	B	B	B	H	H	H	A	B	A	H	-	H	B	-	-	H	A	B	A	H	-	H	H	H	H	-	H	H	A	A	H	H	H	H	B	B	H	H	H	A	A	H	B
5587	A02	5688427	A	H	H	H	B	B	B	H	H	H	A	B	A	H	A	H	B	H	B	H	-	B	A	H	A	H	H	H	H	A	H	H	A	A	H	H	H	H	B	B	H	H	H	A	A	H	B
5588	A02	5688430	A	H	H	H	B	B	B	H	H	H	A	B	A	H	A	H	B	H	B	H	A	B	A	H	A	H	H	H	H	A	H	H	A	A	H	H	H	H	B	B	H	H	H	A	A	H	B
5602	A02	5829298	A	H	H	H	-	B	-	H	H	H	A	B	A	H	A	H	-	H	-	H	A	B	A	H	A	H	H	H	H	-	H	H	A	A	H	H	H	H	-	B	H	H	H	A	A	H	B
5639	A02	6298413	A	H	H	H	B	B	-	H	H	H	A	B	-	H	A	H	B	H	B	H	H	-	A	H	A	H	H	H	H	A	H	H	A	-	H	H	H	H	B	B	H	H	H	A	A	H	-
5640	A02	6299780	A	H	H	H	B	B	B	H	H	H	-	B	A	H	A	H	B	H	B	H	H	B	A	H	A	H	H	H	H	A	H	H	A	A	H	H	H	H	B	B	H	H	H	A	A	H	B
5643	A02	6309400	A	H	H	H	B	B	B	H	H	H	A	-	-	H	A	H	B	H	B	H	H	B	A	H	A	H	H	H	H	-	H	H	A	A	H	H	H	H	B	-	H	H	H	A	A	H	-
5660	A02	6449865	A	H	H	-	B	B	B	A	H	H	A	B	A	H	A	H	B	H	B	H	H	-	A	H	A	H	H	H	H	A	H	H	A	A	H	-	H	H	B	B	H	H	H	A	A	H	B
5665	A02	6489585	A	H	H	H	B	B	B	A	H	H	A	B	A	H	A	H	B	H	B	H	H	-	-	H	A	H	H	H	H	A	H	H	A	A	H	H	H	H	-	B	H	H	H	A	A	H	-
5667	A02	6491684	A	H	H	H	B	B	-	A	H	H	A	B	A	H	A	H	B	H	B	H	H	B	A	H	A	H	H	H	H	A	H	H	A	A	-	H	H	H	B	-	H	H	H	A	A	H	B
5678	A02	6543734	-	H	H	H	B	B	-	A	H	H	A	B	A	H	A	H	B	H	B	H	H	B	H	H	A	H	H	H	H	A	H	H	A	A	H	H	-	H	B	B	H	H	H	A	A	H	B
5694	A02	6698286	A	H	B	H	B	B	B	A	H	H	A	B	A	H	A	H	B	H	B	H	H	B	H	H	A	H	H	H	H	A	H	H	A	A	H	H	H	H	B	H	H	H	H	A	A	H	B
5705	A02	6816450	A	H	B	-	-	B	B	A	H	H	A	B	A	H	-	H	B	H	B	H	H	-	H	H	A	H	H	H	H	A	H	H	A	-	H	H	H	H	-	H	-	H	H	-	A	-	B
5706	A02	6843337	A	H	B	H	B	B	B	A	H	H	A	B	A	H	A	H	B	H	B	H	H	B	H	H	A	H	H	H	H	A	H	H	-	A	H	H	H	H	B	H	H	H	H	A	A	H	-
5728	A02	7097962	A	H	B	H	B	B	B	A	H	H	A	B	A	H	A	H	B	H	B	H	H	B	H	H	A	H	H	H	H	A	H	H	A	A	H	H	H	H	B	H	H	H	H	A	A	H	B
5730	A02	710040	A	H	H	-	H	B	H	H	B	H	H	B	A	A	H	H	H	B	A	B	A	B	A	H	H	A	H	H	A	A	H	H	A	H	B	H	H	-	H	B	B	A	H	H	H	H	B
5766	A02	756260	A	H	H	B	H	B	H	H	B	H	H	B	-	A	H	H	H	-	-	B	A	B	A	H	-	A	H	-	A	A	H	H	-	H	-	-	H	H	H	B	B	A	H	H	H	H	B
5773	A02	760507	A	H	H	B	H	B	H	H	B	H	H	B	A	A	H	H	H	B	A	B	A	B	A	H	H	A	H	H	A	A	H	H	A	A	B	H	H	H	H	B	B	A	H	H	H	H	B
5778	A02	770150	A	H	H	B	H	-	H	H	B	H	H	-	A	A	H	H	H	B	A	B	A	B	A	H	H	A	H	H	A	A	H	H	A	A	B	H	H	H	H	B	B	A	H	H	H	H	B
5857	A02	8368329	A	H	B	-	B	B	B	A	H	H	A	B	A	H	A	H	B	H	B	H	-	B	H	H	A	H	H	H	H	-	H	H	A	A	H	H	H	H	B	H	H	H	H	A	-	H	-
5902	A02	8742070	A	H	-	H	B	B	B	A	H	H	A	-	A	H	A	H	B	H	B	H	H	B	H	H	A	-	H	H	H	A	H	H	A	-	H	H	H	H	B	H	H	H	H	A	A	H	-
5941	A02	9074214	A	H	-	H	B	B	-	A	H	H	-	-	-	H	-	H	B	H	B	H	H	-	H	H	-	H	H	H	H	-	H	H	A	A	H	H	H	-	B	H	H	H	H	-	A	-	B
5942	A02	9074217	A	H	B	H	B	B	B	A	H	H	A	B	A	H	A	H	B	H	B	H	H	B	H	H	-	H	H	H	H	A	H	H	A	A	H	H	H	H	B	H	H	H	H	A	A	H	B
5947	A02	909003	A	H	H	B	H	B	H	H	B	H	H	-	A	A	H	H	H	B	A	B	A	B	A	H	H	A	H	H	A	A	H	H	A	A	B	H	H	H	H	-	B	A	H	H	H	H	B
5949	A02	9116367	H	H	H	H	H	H	H	A	H	H	A	H	A	-	A	H	H	H	H	A	H	H	H	H	A	H	H	H	H	A	H	H	A	A	H	H	H	H	H	H	H	H	H	A	A	H	H
5956	A02	9175491	H	H	B	H	B	B	B	A	H	H	A	B	-	-	A	H	B	H	-	H	H	B	H	H	A	H	H	H	H	A	H	H	A	A	H	H	H	H	B	H	H	H	H	A	A	H	B
6004	A02	9697763	H	H	B	H	B	B	B	A	H	H	A	B	A	H	A	H	B	H	B	H	H	-	-	H	A	H	H	H	H	A	H	H	A	A	H	-	H	H	-	H	H	H	H	A	A	H	B
6012	A02	975128	A	H	H	B	H	B	H	H	B	H	A	B	A	A	H	H	H	B	A	B	A	B	A	H	H	A	H	H	A	A	H	H	A	A	B	H	H	H	H	B	B	A	B	H	H	H	B
6020	A02	9774484	H	H	B	H	B	B	B	A	H	H	A	B	A	H	A	H	B	H	B	H	H	B	H	H	A	H	H	H	H	A	H	H	A	-	H	-	H	H	H	H	H	H	H	A	A	H	-
6025	A02	980464	A	H	H	B	H	B	H	H	B	H	A	B	A	A	H	H	H	B	A	B	A	B	A	-	H	A	H	H	A	A	H	H	A	A	B	H	H	H	H	B	B	A	B	H	H	H	B
6081	A03	10255553	H	B	H	H	H	H	H	H	A	B	H	A	H	H	B	H	A	H	B	A	H	A	H	H	-	B	H	B	A	H	H	H	H	H	-	A	B	H	H	H	A	A	H	H	B	H	H
6101	A03	10424539	H	H	H	H	H	H	H	A	A	H	A	H	A	B	A	H	B	B	B	H	H	H	-	H	B	H	A	H	H	A	H	H	H	H	B	A	B	B	A	B	H	A	H	H	H	H	A
6103	A03	10454630	H	B	H	H	H	H	H	H	A	B	H	A	H	H	B	H	A	H	B	A	H	A	H	H	H	B	H	H	A	H	H	H	H	H	A	A	H	H	H	H	A	A	H	H	B	H	H
6116	A03	10543455	H	B	H	H	H	H	H	H	A	B	H	A	H	H	B	H	A	H	B	A	H	A	H	H	H	B	H	H	A	H	H	H	H	H	A	A	H	H	H	H	A	A	H	H	B	H	H
6119	A03	10563673	H	B	H	H	H	H	H	H	A	B	H	A	H	H	B	H	A	H	B	A	H	A	H	H	H	B	H	H	A	H	H	H	H	H	A	A	H	H	H	H	A	A	H	H	B	H	H
6126	A03	10626150	H	B	-	H	H	-	H	H	A	B	H	A	H	-	-	H	A	-	H	A	H	A	-	H	-	B	H	H	A	A	-	-	A	H	A	A	H	H	H	-	A	A	H	-	B	H	H
6136	A03	10650437	H	B	H	H	H	H	H	H	A	-	H	A	H	H	B	-	A	H	B	A	H	A	H	H	H	B	H	H	A	H	H	H	H	H	A	A	H	H	H	H	A	-	H	H	B	H	H
6151	A03	10735342	H	B	H	H	H	H	H	H	A	-	H	-	H	H	B	H	-	H	-	A	H	A	H	H	H	B	H	H	A	H	H	H	H	H	A	A	H	H	H	H	A	A	H	H	-	H	H
6156	A03	10788780	H	-	H	H	H	H	H	H	A	B	H	A	H	H	B	H	A	H	B	A	H	A	H	H	H	B	H	H	A	H	H	H	H	H	A	A	H	H	H	H	A	A	H	H	B	H	H
6157	A03	10788783	H	B	H	H	H	H	H	H	A	-	H	A	H	H	-	H	A	H	B	A	H	-	H	H	H	B	H	H	A	H	H	H	H	H	A	A	H	H	H	H	A	-	H	H	-	H	H
6169	A03	10891675	H	B	H	H	H	H	H	H	A	B	-	A	H	H	B	H	A	H	B	A	H	A	H	H	H	B	H	H	A	H	H	H	H	H	A	A	H	H	H	H	A	-	H	H	B	H	H
6172	A03	10933272	H	-	H	H	H	H	H	H	A	B	H	-	H	H	B	H	A	H	B	A	H	A	H	H	H	B	H	H	A	H	H	H	H	H	A	A	H	H	H	H	-	A	H	H	B	H	H
6194	A03	1108704	H	H	H	H	-	-	H	H	H	H	-	-	H	H	H	H	H	H	-	-	H	H	H	-	H	H	-	H	H	H	H	H	H	-	-	H	-	H	H	H	H	H	H	H	H	H	-
6251	A03	11603485	H	B	H	B	H	H	H	H	A	B	H	-	H	H	-	H	A	A	-	A	H	A	H	H	H	B	H	H	A	H	H	H	H	H	A	A	H	H	A	H	A	A	H	H	B	H	H
6262	A03	11644472	H	B	H	B	H	H	H	H	A	B	H	A	H	H	B	H	A	A	B	A	H	A	H	H	H	B	H	H	A	H	H	H	H	H	A	-	H	H	A	H	A	A	H	H	B	H	H
6271	A03	11698920	H	B	H	B	H	H	H	H	-	B	H	A	H	H	B	H	A	A	B	A	H	A	H	H	H	B	H	H	A	H	H	H	H	H	A	A	H	H	A	H	-	A	H	H	B	H	H
6280	A03	11721761	H	B	H	B	H	H	H	H	H	B	H	A	H	H	B	H	A	A	B	A	H	A	H	H	H	B	H	H	A	H	B	H	H	-	A	A	H	H	A	H	-	A	H	H	B	H	H
6282	A03	11726005	H	B	H	-	H	H	H	H	H	B	H	A	H	H	B	H	A	A	B	A	H	A	H	H	H	-	H	H	A	H	B	H	H	H	-	A	H	H	A	H	A	-	H	H	-	H	H
6284	A03	11730379	H	B	H	B	H	H	H	H	H	B	H	A	H	-	B	H	A	A	B	A	H	A	H	H	-	B	H	H	A	H	B	H	H	H	A	A	H	H	A	H	A	A	H	H	B	H	H
6305	A03	11800806	H	B	H	B	H	H	H	H	H	B	H	A	H	H	B	H	A	A	B	A	H	A	H	H	H	B	H	H	A	H	B	H	H	H	A	A	H	H	A	H	A	A	H	H	B	H	H
6308	A03	11804194	H	B	H	-	H	H	H	H	H	B	H	A	H	H	B	H	A	A	-	A	H	A	H	H	H	B	H	H	A	H	B	H	H	H	A	-	H	H	A	H	A	A	H	H	B	H	H
6337	A03	12015253	H	B	H	H	H	H	H	H	H	B	H	A	H	H	B	H	A	A	B	A	H	A	H	H	H	B	H	H	A	H	B	B	B	H	A	A	H	H	A	H	A	A	H	H	B	H	H
6342	A03	12031784	H	B	H	H	H	H	H	H	H	B	H	A	-	H	B	H	A	A	-	A	H	A	H	H	H	B	A	H	A	-	B	B	B	H	A	A	H	-	A	H	H	A	H	H	B	H	H
6343	A03	12031787	H	B	H	H	H	H	H	H	H	B	H	A	H	H	B	H	A	A	B	A	H	A	H	H	H	B	A	H	A	H	B	B	B	H	A	A	H	H	A	H	H	A	H	H	B	H	H
6345	A03	12036474	H	B	H	H	H	H	H	H	H	B	H	A	H	H	B	H	A	A	B	A	H	A	H	H	H	B	A	H	A	H	B	B	B	H	A	A	H	H	A	H	H	A	H	H	B	H	H
6350	A03	12057704	H	B	H	H	H	H	H	H	H	-	H	A	H	H	B	-	A	A	B	A	H	A	H	H	H	B	A	H	A	-	B	B	-	H	A	A	H	H	-	-	H	A	H	H	B	H	H
6351	A03	12057707	H	B	H	H	H	H	H	H	H	B	H	A	H	H	B	H	A	A	B	-	H	A	H	H	H	B	-	H	A	H	B	B	B	H	A	A	H	H	A	H	H	A	H	H	B	H	H
6358	A03	12180820	H	B	B	H	H	H	H	H	H	B	H	A	H	H	B	H	A	A	B	A	H	A	H	H	H	B	A	H	A	H	B	B	-	H	A	A	H	H	A	H	H	A	H	H	B	H	H
6391	A03	12420818	H	-	B	H	H	H	H	H	H	B	H	A	-	H	B	H	A	A	B	A	H	A	H	H	H	B	A	H	A	H	B	B	B	H	A	A	H	H	A	H	H	A	H	H	B	H	H
6392	A03	12421759	H	B	B	H	H	H	H	H	H	B	H	-	-	H	B	H	A	A	B	A	H	A	H	H	H	B	A	H	A	H	B	B	B	H	A	A	H	H	A	H	H	A	H	H	B	H	H
6396	A03	12477447	H	B	B	H	H	H	H	H	-	-	H	-	H	H	B	H	A	A	B	A	A	A	-	H	H	B	A	-	A	H	B	B	B	H	-	A	H	H	-	H	H	A	H	H	B	H	H
6399	A03	12490914	H	B	B	H	H	H	H	H	H	B	H	A	H	H	B	H	A	-	B	A	A	A	H	H	H	B	A	H	A	H	B	B	B	H	A	A	-	H	A	H	H	A	H	H	B	H	H
6401	A03	12518938	H	B	B	H	H	H	H	H	H	B	H	A	H	H	B	H	A	A	B	A	A	A	H	H	H	B	A	H	A	H	B	B	B	H	A	-	H	H	A	H	H	-	H	-	B	H	H
6402	A03	12520898	H	B	B	H	H	H	H	H	H	B	H	A	H	H	B	H	A	A	B	A	A	A	B	H	H	-	A	H	A	H	B	B	B	H	A	A	H	H	A	H	H	A	H	H	B	H	H
6420	A03	12697707	H	B	B	H	H	H	H	H	H	B	H	A	H	H	B	H	A	-	B	A	A	A	H	H	H	B	-	H	-	H	B	B	-	H	A	A	H	H	A	H	H	A	H	H	B	H	H
6426	A03	12756929	H	A	H	H	H	H	A	H	H	H	A	H	H	H	H	A	H	A	H	A	H	H	H	H	H	H	A	H	H	A	H	H	H	H	H	H	H	H	H	A	A	H	A	A	H	H	A
6455	A03	12925603	H	B	-	H	H	H	H	H	H	B	H	A	H	B	-	H	-	-	B	A	A	A	H	H	-	B	-	-	A	H	-	B	B	-	-	A	H	H	A	H	H	A	H	H	B	H	H
6476	A03	13127088	H	B	B	H	H	H	H	H	H	B	H	A	H	B	-	H	A	A	-	A	A	A	B	H	B	B	A	A	A	H	B	B	B	H	A	A	H	H	-	H	H	A	H	H	B	H	H
6516	A03	13525110	H	B	-	H	H	H	H	H	H	B	H	A	H	B	B	-	A	A	-	A	A	A	B	H	B	B	A	-	A	H	B	B	B	H	A	A	H	H	A	H	H	A	H	H	B	H	H
6519	A03	13545819	H	B	B	H	H	H	H	H	H	B	H	A	H	B	B	H	A	A	B	A	A	A	B	H	B	B	A	A	A	H	B	B	B	H	A	A	H	H	A	H	H	A	H	H	B	H	H
6526	A03	13624865	H	B	B	H	H	H	H	H	H	B	H	A	H	B	B	H	A	A	B	A	A	A	-	H	B	B	A	A	A	H	B	B	B	H	A	A	H	H	A	H	H	A	H	H	B	H	H
6529	A03	13641332	H	B	B	H	H	H	H	H	H	B	H	A	H	B	B	H	A	A	B	A	A	A	B	H	B	B	A	A	A	H	B	B	B	H	A	A	H	H	A	H	H	A	H	H	B	H	H
6548	A03	13803001	H	B	-	H	H	H	H	H	H	B	H	A	H	B	B	H	A	A	B	A	A	A	B	H	B	B	A	A	A	H	B	B	-	H	A	A	H	H	A	H	H	A	H	H	B	H	H
6573	A03	14059334	H	B	B	H	H	H	H	H	H	-	B	-	H	B	B	H	A	A	B	A	A	A	B	H	B	B	A	A	A	H	B	B	B	H	A	A	H	H	A	H	H	A	H	H	B	H	H
6580	A03	14095649	H	B	B	H	H	H	H	H	H	B	B	H	H	B	B	H	A	A	B	A	A	A	B	H	B	B	A	A	A	H	B	B	B	H	A	A	H	H	A	H	H	A	H	H	B	H	H
6597	A03	1413787	B	B	H	H	H	A	H	A	H	H	B	A	H	H	B	B	B	H	-	H	B	B	H	H	A	H	H	H	B	H	H	-	H	A	A	B	B	H	B	H	H	H	H	H	B	H	A
6603	A03	14163439	H	B	B	H	H	H	H	H	H	B	B	H	H	B	B	H	A	A	B	A	A	A	B	H	-	B	A	A	A	H	B	B	B	H	A	A	H	H	A	H	H	-	H	H	B	B	H
6639	A03	1433287	B	B	-	H	H	A	H	A	H	H	B	A	H	H	B	B	B	H	H	H	B	B	H	H	A	H	H	H	B	H	H	A	H	A	A	B	B	H	B	H	H	H	H	H	B	H	H
6640	A03	14334160	H	B	-	-	H	H	H	H	H	B	B	H	H	B	B	H	A	A	B	A	A	A	B	H	B	B	A	A	A	H	B	B	B	H	A	-	H	H	A	H	H	A	H	H	B	B	H
6641	A03	14334163	H	B	B	H	H	H	H	H	H	B	B	H	H	B	B	H	A	A	B	A	A	A	B	H	B	B	A	A	A	H	B	-	-	H	A	A	H	H	A	H	H	A	H	H	B	B	H
6649	A03	14424603	H	B	B	H	H	H	H	H	H	-	-	H	H	B	B	-	A	-	B	A	-	-	-	H	-	B	-	A	-	H	-	-	B	H	A	-	H	H	-	H	-	A	H	-	B	-	-
6650	A03	14424606	H	B	B	H	H	H	H	H	H	-	-	H	H	-	-	-	-	-	-	-	A	-	-	H	B	-	A	A	-	H	B	-	B	H	-	A	H	H	-	H	H	-	H	H	-	B	H
6683	A03	14594269	H	B	B	H	H	H	H	H	H	B	B	H	H	B	B	H	A	A	B	A	A	A	B	H	B	B	A	A	A	H	B	B	B	H	A	A	H	H	A	H	H	A	H	H	B	B	H
6739	A03	1485546	-	B	H	H	H	A	H	-	H	H	B	-	H	H	B	-	B	H	H	H	-	B	H	H	A	H	H	H	-	H	H	-	H	-	-	B	B	H	B	H	H	H	H	H	-	H	H
6755	A03	14911481	H	H	H	H	H	A	H	A	H	H	H	A	H	H	H	H	H	H	A	H	H	H	A	H	A	H	H	H	H	H	H	H	A	H	H	H	H	H	H	A	H	-	H	H	A	A	A
6757	A03	149188	B	B	B	H	H	H	H	A	H	H	B	A	-	H	B	B	B	H	H	H	B	B	H	H	A	H	H	H	B	H	H	A	H	A	A	B	B	H	B	H	H	B	H	H	H	H	A
6766	A03	1494474	B	B	H	H	H	A	H	A	H	H	B	A	H	H	B	B	B	H	H	H	B	B	H	-	A	H	H	H	B	-	H	A	H	A	A	B	B	H	B	H	H	H	H	H	B	H	H
6773	A03	14969444	H	B	B	H	H	H	H	H	H	B	B	H	H	B	B	H	A	A	B	A	A	A	B	H	B	B	A	A	A	H	B	B	B	H	A	A	H	H	A	H	H	A	H	H	B	B	H
6795	A03	15057210	H	B	B	-	H	H	H	-	H	B	B	H	H	-	B	H	A	A	B	A	A	-	B	H	B	-	A	-	A	H	B	B	B	H	A	A	H	H	A	B	H	A	H	H	B	B	H
6807	A03	15109714	H	B	-	H	H	H	H	H	H	B	B	H	H	B	B	H	A	A	B	-	A	A	B	H	B	B	A	-	-	H	B	B	B	H	A	A	H	H	A	B	H	A	H	H	B	B	H
6810	A03	15135983	H	B	B	H	H	H	H	H	H	B	B	H	H	B	B	H	A	A	B	A	A	A	B	H	B	B	A	A	A	H	B	B	B	H	A	A	H	H	A	B	H	A	H	H	B	B	H
6838	A03	15292872	H	B	B	H	H	H	H	-	H	B	-	-	H	B	B	H	A	A	B	A	A	A	B	H	B	B	A	A	A	H	B	H	B	H	A	A	H	H	A	-	H	A	H	H	-	B	H
6844	A03	15320290	H	B	B	H	H	H	H	H	H	B	B	H	H	B	B	H	A	A	B	A	A	-	B	H	B	B	A	A	A	H	B	H	B	H	A	A	H	H	A	B	H	A	H	H	B	B	H
6923	A03	1579394	B	B	H	H	H	A	H	A	H	H	B	A	H	H	B	B	B	H	H	H	B	B	H	H	A	H	H	H	B	H	H	A	H	A	A	B	B	H	B	H	H	H	H	H	B	H	H
6944	A03	15880890	H	B	-	H	H	H	H	H	H	B	B	H	H	B	-	H	A	A	B	A	A	A	B	H	B	B	A	A	H	H	B	H	B	H	A	A	H	H	-	B	H	-	H	H	B	B	H
6948	A03	15928706	H	B	B	H	H	H	H	H	H	B	B	H	H	B	B	H	A	A	B	A	A	A	B	H	B	B	A	A	H	H	B	H	B	H	A	A	H	H	-	B	H	H	H	H	B	B	H
6954	A03	15958280	H	B	B	H	H	H	H	H	H	B	B	H	H	B	B	H	A	A	B	A	A	A	B	H	B	B	A	A	H	H	B	H	B	H	A	A	H	H	A	B	H	H	H	H	B	B	H
6955	A03	15958283	H	B	B	H	H	H	H	H	H	B	B	H	H	-	B	H	A	A	B	A	A	A	B	H	B	B	A	-	H	H	B	H	B	H	A	A	H	H	A	-	H	H	H	H	B	B	H
6964	A03	1601596	B	B	H	H	H	A	H	A	H	H	B	A	H	H	B	B	B	H	H	H	B	B	H	H	A	H	H	H	B	H	H	A	H	A	A	B	B	H	B	H	H	H	H	H	B	H	H
6966	A03	16028618	H	B	B	H	H	H	H	H	H	B	-	H	H	B	-	H	-	-	-	A	-	A	-	H	-	B	A	A	-	H	H	H	B	H	A	A	H	H	A	-	H	H	H	-	B	-	H
6975	A03	16075245	H	B	B	H	H	H	H	-	H	B	B	H	H	B	B	H	A	A	B	A	A	A	-	-	B	B	A	A	H	H	H	H	B	-	A	A	H	H	A	-	H	H	H	H	B	B	H
6976	A03	16076278	H	-	-	H	H	H	H	H	H	B	B	H	H	B	B	H	A	-	B	A	-	-	B	H	B	B	A	-	H	H	-	H	B	H	A	A	H	H	A	-	H	H	H	H	B	B	H
7092	A03	16637611	H	H	-	-	H	H	-	H	H	-	-	H	H	A	H	H	H	-	H	A	A	H	A	H	H	A	H	-	H	-	H	H	H	H	H	H	H	H	H	-	H	H	H	H	H	A	-
7135	A03	16910975	H	H	-	H	H	H	H	H	H	B	-	H	H	B	B	H	A	A	B	A	A	A	B	H	B	H	A	A	H	H	H	H	B	H	A	A	H	H	A	B	H	H	H	H	B	B	H
7137	A03	16911973	H	H	-	H	-	H	H	H	H	B	B	-	H	B	B	H	A	A	B	A	A	A	B	H	B	-	A	A	H	H	H	H	B	H	A	A	H	H	-	B	H	H	H	H	B	B	H
7142	A03	16925271	H	H	B	H	H	H	H	H	H	B	B	H	H	B	B	H	A	A	B	A	A	A	-	H	B	H	A	A	H	H	H	H	B	H	A	A	H	H	A	B	H	H	-	H	B	B	H
7144	A03	16969778	H	H	B	H	H	H	H	H	H	-	B	H	H	B	B	H	A	A	B	A	A	A	B	H	B	H	A	A	H	H	H	H	B	H	A	A	H	H	A	B	H	H	H	H	B	B	H
7166	A03	17157306	H	H	B	H	H	H	-	H	H	B	B	H	H	B	B	H	A	A	B	A	A	A	B	H	B	H	A	A	H	H	H	H	-	H	A	A	H	H	A	B	H	H	H	H	B	B	H
7174	A03	17195322	H	H	B	H	H	H	H	H	H	B	B	H	H	-	H	H	A	A	B	A	A	A	B	H	B	H	A	A	H	A	H	H	B	H	A	A	H	H	H	B	H	H	H	H	B	B	H
7183	A03	17227842	H	H	B	H	H	H	H	H	H	B	B	H	H	B	H	H	A	A	B	-	A	A	B	H	H	H	A	A	H	A	H	H	B	H	A	A	H	H	H	B	H	H	H	H	B	B	H
7185	A03	17232453	H	H	-	H	H	H	H	H	H	-	-	H	H	-	H	H	-	-	B	-	-	-	B	H	H	H	A	-	H	-	H	H	-	H	A	A	H	H	H	B	H	H	H	H	-	B	H
7203	A03	17395789	H	H	B	H	H	H	H	H	H	B	B	H	H	B	H	H	A	A	B	A	A	A	B	H	H	H	A	A	H	A	H	H	B	H	A	A	H	H	H	B	H	H	H	H	B	B	H
7205	A03	1740168	B	B	H	H	H	A	H	A	-	H	H	A	H	H	B	B	B	H	H	H	H	B	H	H	A	H	H	H	B	H	H	A	H	A	A	-	B	H	B	H	H	H	H	H	B	H	H
7210	A03	17438949	H	H	B	H	H	H	H	H	H	B	B	H	H	B	H	H	A	A	B	A	A	A	B	H	H	H	A	A	H	A	H	H	B	H	A	-	H	H	H	-	H	H	H	H	B	B	H
7235	A03	1769877	H	H	H	H	H	A	H	A	H	H	H	A	H	H	H	H	H	H	H	H	H	H	H	H	A	H	H	H	H	H	-	A	H	A	A	H	H	H	H	H	H	H	H	H	H	H	H
7264	A03	17946169	H	H	B	H	H	H	H	H	H	B	B	H	H	B	H	H	A	A	B	A	A	A	B	H	H	H	-	-	H	A	H	H	B	H	A	A	H	H	H	B	H	H	H	H	B	B	B
7267	A03	1795943	B	B	H	H	H	A	H	A	H	H	H	A	H	H	B	B	B	H	H	-	H	-	H	H	A	H	H	-	B	H	H	A	H	A	A	B	B	H	B	H	H	H	H	H	B	H	H
7294	A03	18202799	H	H	B	H	H	H	H	H	H	-	B	H	H	H	H	H	A	A	B	A	A	A	B	H	H	H	H	A	H	A	H	H	B	H	-	A	H	H	-	B	H	H	B	H	B	B	B
7295	A03	18203270	H	H	B	H	H	H	H	H	H	B	B	H	H	H	H	H	A	A	B	A	A	A	B	H	H	H	H	A	H	A	H	H	B	H	A	A	H	H	H	B	H	H	B	H	B	B	B
7296	A03	1821297	B	B	H	H	H	A	H	A	H	H	H	A	H	H	B	B	B	H	H	H	H	B	H	H	A	H	H	H	B	H	H	A	H	A	A	B	B	H	B	H	H	H	H	H	B	H	H
7310	A03	183698	B	-	B	H	H	H	H	A	H	H	B	A	B	H	B	B	B	H	-	-	B	B	H	H	A	H	H	H	B	H	H	A	H	A	-	B	B	H	B	H	H	B	H	H	H	H	A
7414	A03	19140581	H	H	B	H	H	H	H	H	H	B	B	H	H	H	H	H	A	A	B	A	A	A	B	H	H	H	H	A	H	A	H	H	B	H	A	A	H	H	H	B	H	H	B	H	B	B	B
7415	A03	19146494	H	H	B	H	H	H	H	H	H	B	B	H	H	H	H	H	A	A	B	A	A	A	B	H	H	H	H	A	H	A	H	H	B	H	A	A	H	H	H	B	H	H	B	H	B	B	B
7418	A03	19151637	H	H	B	H	H	H	H	H	H	B	B	H	H	H	H	H	A	A	B	A	A	A	B	H	H	H	H	A	H	A	H	H	B	H	A	A	H	H	H	B	H	H	B	H	B	B	B
7422	A03	19180324	H	H	B	-	H	H	H	H	H	B	B	H	H	H	H	H	A	A	B	A	A	A	-	-	-	H	H	-	H	A	H	H	B	H	A	A	H	H	H	B	H	H	B	H	B	B	-
7481	A03	1992135	B	B	H	H	H	H	H	A	H	H	H	A	H	H	B	B	B	H	H	H	H	B	H	H	A	H	H	H	B	H	H	A	A	A	A	B	B	H	B	H	H	H	H	H	B	H	H
7497	A03	19999721	B	H	H	H	A	B	H	A	H	A	H	H	H	A	B	A	H	H	H	B	A	H	H	B	A	B	H	B	A	B	B	H	H	A	A	H	A	B	H	H	A	H	H	A	H	A	B
7503	A03	2003483	B	B	H	H	H	H	H	A	H	H	H	A	H	H	B	B	B	H	H	H	H	B	H	H	A	H	H	H	B	H	H	A	A	A	A	B	B	H	B	H	H	H	H	H	B	H	H
7571	A03	20639459	B	H	B	H	H	B	H	H	H	B	B	H	H	H	H	H	A	A	B	A	A	A	B	H	H	H	H	A	H	A	H	H	H	A	A	A	H	H	H	B	H	H	B	H	B	B	B
7573	A03	20639863	B	H	B	H	H	B	H	H	H	B	B	H	H	H	H	H	A	A	B	A	A	A	-	H	H	H	H	A	-	A	H	H	H	A	A	A	H	H	H	B	H	H	B	H	-	B	B
7574	A03	20642340	B	H	B	H	H	B	H	H	H	-	B	H	H	H	H	H	A	A	B	A	A	A	B	H	H	H	H	-	H	A	H	H	H	-	A	A	H	H	H	B	H	H	B	H	B	B	B
7575	A03	20642343	B	H	B	H	H	B	H	H	H	B	B	H	H	H	H	H	A	-	B	A	A	A	B	H	H	H	H	A	H	A	H	H	H	A	A	A	H	H	H	B	H	H	B	H	B	B	B
7577	A03	20642747	B	H	B	H	H	B	H	H	H	B	B	H	H	H	H	H	A	A	B	A	A	A	B	H	H	H	H	A	H	A	H	H	H	A	A	-	H	H	H	B	H	H	B	H	B	B	B
7578	A03	20655643	H	-	H	-	H	H	A	B	H	A	-	B	B	A	H	H	H	-	H	A	A	B	A	H	H	H	H	H	B	A	B	H	H	B	B	H	B	H	H	-	-	H	H	H	H	A	A
7623	A03	20999946	B	H	B	H	H	B	H	H	H	B	B	H	H	H	H	H	A	A	B	A	A	A	B	H	H	H	H	A	H	A	H	H	H	A	A	A	H	H	H	B	H	H	B	H	B	B	B
7625	A03	21004241	B	H	B	H	H	-	H	H	H	B	B	H	H	H	H	H	A	A	B	A	A	A	B	H	H	H	H	A	H	A	H	H	H	A	A	A	H	H	H	B	H	H	B	H	B	B	B
7643	A03	21119055	B	-	B	H	-	B	H	H	H	-	B	H	H	H	H	H	-	A	B	A	A	A	B	H	H	H	H	A	H	A	H	H	H	-	A	A	H	H	H	-	H	H	B	H	B	B	-
7650	A03	21178364	-	H	B	H	H	B	H	H	H	B	B	H	H	-	H	H	A	A	-	A	A	-	B	H	H	H	H	A	H	A	H	H	H	A	A	A	H	H	H	B	H	H	B	H	B	B	B
7703	A03	21501212	B	H	-	H	H	B	H	H	H	B	B	H	H	H	H	H	A	A	B	A	A	A	B	H	H	H	H	A	H	A	H	H	H	H	H	H	H	H	H	B	H	H	B	H	B	B	B
7714	A03	21613542	B	H	B	H	H	B	H	H	H	B	B	H	H	H	H	H	A	A	B	A	A	A	B	H	H	H	H	A	H	A	H	H	H	H	H	A	H	H	H	B	H	H	B	H	B	B	B
7719	A03	21656240	B	H	B	H	H	B	H	H	H	B	B	H	H	H	H	H	A	A	-	A	A	A	-	H	H	H	H	A	H	A	H	H	H	H	H	A	H	H	H	B	H	H	B	-	B	-	B
7720	A03	21656243	B	H	B	H	H	-	H	H	H	B	B	H	H	H	H	H	-	A	B	A	A	A	B	H	H	H	H	A	H	A	H	H	H	H	H	A	H	H	H	B	H	H	B	H	B	B	B
7731	A03	21784291	H	A	A	H	H	H	H	H	H	B	H	B	H	A	-	H	A	H	H	H	H	H	H	H	H	H	H	H	H	A	-	H	-	H	-	H	H	H	H	H	A	H	H	H	A	H	H
7743	A03	21833796	B	H	B	H	H	H	H	H	H	B	B	H	H	H	H	H	A	A	-	A	A	-	B	H	H	H	H	A	H	A	H	H	H	H	H	A	H	B	H	B	-	H	B	H	B	-	B
7746	A03	21888110	B	H	-	H	H	H	H	H	H	B	B	H	H	H	H	H	A	-	-	A	A	A	B	H	H	H	-	A	H	A	H	H	H	H	H	A	H	B	H	-	H	H	B	H	B	B	B
7749	A03	21889047	-	H	B	H	H	H	H	H	H	B	-	H	H	H	H	H	A	-	B	A	A	A	B	H	H	H	H	-	H	A	H	H	H	-	H	-	H	B	H	B	H	H	B	H	B	-	-
7754	A03	21920025	B	H	B	H	H	H	H	H	H	B	B	H	H	H	H	H	A	-	H	A	A	A	-	H	H	H	H	A	H	A	H	H	H	H	H	-	H	-	H	B	H	H	B	H	B	B	B
7756	A03	21943272	B	H	B	H	H	H	H	H	H	B	B	H	H	H	H	H	A	A	H	A	A	A	B	H	H	H	H	A	H	-	H	H	H	H	H	A	H	B	H	B	H	H	B	H	B	-	B
7757	A03	21945673	B	H	B	H	H	H	H	-	H	B	-	H	H	H	H	H	A	-	H	A	A	A	B	H	H	H	H	A	H	A	H	H	-	H	H	A	H	B	H	B	-	H	B	H	B	-	B
7772	A03	22023660	B	H	B	H	H	H	H	H	H	B	B	H	H	H	H	H	A	A	H	A	A	A	B	H	H	H	H	A	H	A	H	H	H	H	H	A	H	B	H	B	H	H	B	H	B	B	B
7774	A03	22083326	B	H	B	H	H	H	H	H	H	B	B	H	H	H	H	H	A	A	H	A	A	A	B	H	H	H	H	A	H	A	H	H	H	H	H	A	H	B	H	B	H	H	B	H	B	B	-
7775	A03	22124545	B	H	B	H	H	H	H	H	H	H	B	H	H	H	H	H	A	A	H	A	A	A	B	H	H	H	H	A	H	A	H	H	H	H	H	A	H	B	H	B	H	H	B	H	B	B	B
7776	A03	22124548	B	H	B	H	H	H	H	H	H	H	B	H	H	H	H	H	-	A	-	A	A	A	B	H	H	H	H	A	H	A	H	H	H	H	H	A	H	B	H	B	H	H	B	H	B	B	B
7778	A03	22129976	B	H	B	H	H	H	H	H	H	H	B	H	H	H	H	H	A	A	-	A	A	A	B	H	H	H	H	A	H	A	-	H	H	H	H	A	H	B	H	-	H	H	B	H	B	B	B
7779	A03	22139935	B	-	B	H	H	H	H	H	H	H	B	H	H	H	H	H	A	A	H	A	A	-	-	H	-	H	H	-	H	A	H	H	H	H	H	A	H	B	H	B	B	H	B	H	B	-	B
7780	A03	22156349	B	-	B	H	H	H	-	H	H	H	B	-	H	H	H	H	A	A	H	A	-	A	B	H	-	H	H	A	H	A	H	H	H	H	H	A	H	B	-	-	-	H	B	H	B	B	B
7787	A03	2229334	B	B	H	H	H	H	H	A	H	H	H	A	H	H	B	B	B	H	H	H	H	B	H	H	A	H	H	H	B	H	H	A	A	A	A	B	B	H	B	H	H	H	H	H	B	H	H
7792	A03	22343070	B	A	B	H	H	H	H	H	H	H	B	H	H	H	H	H	A	A	H	A	H	A	B	H	H	H	H	A	H	A	H	H	H	H	H	-	H	B	H	B	B	H	B	H	B	B	B
7793	A03	22343073	B	A	B	H	H	H	H	H	H	H	B	H	H	H	H	H	A	A	H	A	H	A	B	H	H	H	H	A	H	A	H	H	H	H	H	A	H	B	H	-	B	H	B	H	B	B	B
7809	A03	22441498	-	A	B	H	H	H	H	H	H	H	B	H	H	H	H	H	A	A	H	A	H	A	B	H	H	H	H	A	H	A	H	H	H	H	H	A	H	B	H	B	B	H	B	H	B	B	B
7814	A03	22461334	B	A	B	H	H	H	H	H	H	H	B	H	H	H	H	-	A	-	H	A	H	A	B	H	H	H	H	A	H	A	H	H	H	H	H	A	H	B	H	B	B	H	B	H	B	B	B
7815	A03	22461337	B	A	B	H	H	H	H	H	H	H	B	H	H	H	H	H	A	A	H	A	H	A	B	H	H	H	H	A	H	A	H	H	H	H	-	A	H	B	H	B	B	H	B	H	B	B	B
7821	A03	22519184	B	A	B	B	H	H	H	H	H	H	B	H	H	H	H	H	A	A	H	-	H	A	B	H	H	H	H	A	H	A	H	H	H	H	H	A	H	B	H	B	B	H	B	H	B	B	B
7830	A03	22594651	H	H	H	B	H	A	B	H	A	H	H	H	H	H	H	B	H	-	H	-	H	A	B	-	A	A	B	A	H	H	B	H	A	A	H	H	B	H	H	H	H	H	B	H	H	B	B
7834	A03	22654524	B	A	B	B	B	H	H	H	H	H	B	B	H	H	H	H	A	A	H	A	H	A	B	H	H	H	H	A	H	A	H	H	A	H	H	A	H	B	H	-	B	H	B	H	B	B	-
7852	A03	22782513	B	-	B	B	B	H	H	-	-	H	B	B	H	H	H	H	A	A	H	A	H	A	-	H	H	H	H	-	H	-	H	H	A	H	H	A	H	-	-	B	B	H	B	H	B	H	B
7859	A03	2285690	-	H	A	H	H	H	H	-	H	H	H	H	H	H	H	-	H	A	H	H	H	H	H	-	H	H	H	A	A	H	-	H	H	H	H	H	H	H	H	H	H	H	-	-	H	H	H
7884	A03	22999256	B	A	B	B	B	H	H	H	H	H	B	B	H	H	H	H	A	H	H	A	H	A	B	H	H	H	H	A	H	A	H	H	A	H	H	A	H	H	H	B	B	H	B	H	B	H	B
7887	A03	22999799	B	A	B	B	B	H	H	H	H	H	B	B	H	H	H	H	A	H	H	A	H	A	B	H	H	H	H	-	H	A	H	H	A	H	H	A	H	H	H	B	B	H	B	H	B	H	B
7888	A03	23001217	B	A	B	B	B	H	H	H	H	H	B	B	H	H	H	H	H	H	H	A	-	A	-	H	H	H	H	A	H	A	H	H	A	H	H	A	H	-	H	B	B	H	B	H	B	H	B
7889	A03	23001220	B	A	B	B	B	H	H	H	H	-	B	B	H	-	H	H	A	H	H	A	H	A	B	H	H	H	H	-	-	-	H	H	A	H	H	A	H	H	H	B	B	H	B	H	B	H	-
7895	A03	23042996	B	A	B	B	B	H	H	H	H	H	B	B	H	H	H	H	A	H	H	A	H	A	B	H	H	H	H	A	H	A	H	H	A	H	H	A	H	H	H	B	B	H	B	H	B	H	B
7896	A03	23042999	-	A	B	-	B	H	H	H	-	H	B	B	H	H	H	H	A	H	H	A	H	A	-	H	H	H	H	A	H	-	H	H	A	H	H	A	H	H	H	B	-	H	B	H	B	H	B
7897	A03	23043948	-	A	B	B	B	H	H	H	H	H	B	B	H	H	H	H	A	H	H	A	H	A	B	H	H	H	H	A	H	A	H	H	A	H	H	A	H	H	H	B	B	H	B	H	B	H	B
7937	A03	23316795	B	A	B	B	B	H	H	H	H	H	B	B	H	H	H	H	A	H	H	A	H	A	B	H	H	H	H	A	H	A	H	H	A	H	H	A	H	H	H	B	B	H	B	H	B	H	B
7981	A03	23602753	B	A	B	B	B	-	H	H	H	H	B	B	H	H	H	H	A	H	H	-	H	A	B	A	H	H	H	A	H	A	H	H	A	H	H	-	H	H	H	B	B	H	B	H	B	H	B
7983	A03	23604435	B	-	-	-	-	H	H	H	H	H	B	B	H	H	-	H	-	H	H	-	-	-	-	A	H	-	H	A	H	-	H	H	-	H	H	-	H	H	H	-	-	H	B	H	-	H	B
8043	A03	24045988	B	A	B	B	B	H	H	H	H	H	B	B	H	H	H	H	A	H	H	A	H	A	B	A	H	H	H	-	A	A	H	H	A	H	H	-	H	H	H	B	B	H	B	H	B	H	B
8044	A03	24047342	B	-	-	B	-	H	H	H	H	H	-	-	H	-	H	-	A	H	-	-	H	-	B	-	H	H	H	A	-	-	H	H	A	H	H	A	H	H	H	B	B	H	B	H	-	H	B
8046	A03	24081370	B	A	B	B	B	H	H	H	H	H	B	B	H	H	H	H	A	H	H	A	H	A	B	A	H	H	H	A	A	A	H	H	A	H	H	A	H	H	H	B	B	H	B	H	B	H	B
8055	A03	24193179	-	A	B	B	B	H	H	H	H	H	B	B	H	H	H	H	A	H	H	A	H	A	B	A	H	H	H	A	A	A	H	H	A	H	H	A	H	H	H	-	B	-	B	H	B	H	B
8057	A03	24215503	-	-	B	B	B	H	H	H	H	H	B	B	H	H	H	H	A	H	H	A	-	A	-	A	-	H	H	A	A	A	H	H	A	H	H	A	H	H	H	B	-	H	B	H	B	H	B
8061	A03	24252413	B	A	B	B	B	H	H	H	H	H	B	B	H	H	H	H	A	H	H	A	H	A	B	A	H	H	H	A	A	A	H	H	-	B	H	A	H	H	H	B	B	H	B	H	B	H	B
8062	A03	24256538	B	A	B	B	B	H	H	H	H	H	B	B	H	H	H	H	A	H	H	A	H	A	-	A	H	H	H	A	A	A	H	H	A	B	H	A	H	H	H	B	-	H	B	H	B	H	B
8095	A03	24679416	B	A	B	-	B	H	H	H	H	H	B	-	H	H	H	H	A	H	H	-	H	-	B	A	H	H	H	A	A	A	H	H	A	B	H	A	H	H	H	B	-	H	B	H	B	H	B
8125	A03	25014488	B	A	B	B	B	H	H	H	H	H	B	B	A	H	H	H	A	H	H	H	H	A	B	A	H	H	H	A	A	A	H	H	A	B	H	A	H	H	H	B	B	H	B	H	B	H	B
8126	A03	25014988	B	A	B	B	B	H	H	H	H	H	B	B	A	H	H	H	A	H	H	H	H	A	B	A	H	H	H	A	A	A	H	H	A	B	H	A	H	H	H	B	B	H	B	H	B	H	B
8144	A03	25121510	-	A	B	B	-	H	H	H	H	H	B	B	A	H	H	H	A	-	H	H	H	A	B	A	H	H	H	A	A	A	H	H	-	B	H	A	H	H	H	-	B	H	B	H	H	H	B
8158	A03	25257572	H	H	-	H	H	H	H	H	H	B	B	H	H	B	H	H	A	A	B	A	A	A	B	H	H	H	A	A	H	A	H	H	B	H	A	A	H	H	H	B	H	H	H	H	B	B	H
8165	A03	25361011	B	A	B	B	B	H	H	H	H	H	B	-	A	H	H	H	A	B	H	H	H	A	B	A	H	H	H	A	A	A	H	H	A	B	H	A	H	H	H	B	B	H	B	H	H	H	B
8190	A03	2558452	B	B	H	H	H	H	H	A	-	H	H	A	H	H	B	H	-	H	H	H	-	-	H	-	A	H	H	H	-	-	H	A	A	A	A	B	B	H	-	B	H	H	-	H	-	H	H
8223	A03	2585186	B	B	H	H	H	H	H	A	H	H	H	A	H	H	B	H	B	H	H	H	H	B	H	H	A	H	H	H	B	H	H	A	A	A	A	B	B	H	B	B	H	H	H	H	B	H	H
8281	A03	26200874	B	A	B	-	H	H	H	H	H	H	B	B	A	H	-	A	A	B	H	H	H	A	B	A	H	H	H	A	A	A	H	H	A	B	H	H	H	H	H	H	B	H	H	H	A	H	-
8287	A03	26283540	H	A	B	B	H	H	H	H	H	H	B	B	A	H	H	A	A	B	H	H	H	A	B	A	H	H	H	A	A	A	H	H	A	B	H	H	H	H	H	H	B	-	H	H	-	H	H
8290	A03	26307933	-	A	B	B	H	H	H	H	H	H	B	B	A	H	H	A	A	B	H	H	H	A	B	-	H	H	H	A	-	A	H	H	A	B	H	H	H	H	H	H	B	H	H	H	A	H	H
8295	A03	26324520	B	A	B	-	H	H	H	H	H	H	B	B	-	H	H	A	A	-	-	H	H	-	B	A	H	H	H	A	-	A	H	H	A	B	H	H	H	H	H	H	B	H	H	H	A	H	H
8307	A03	2642963	B	B	H	H	H	H	H	A	H	H	H	A	H	H	B	H	H	H	H	H	H	B	H	H	A	H	H	H	B	H	H	A	A	A	-	B	-	H	-	B	H	H	H	H	B	H	H
8310	A03	26461767	B	A	B	B	H	H	H	H	A	H	B	B	-	H	H	A	-	-	H	H	-	A	B	A	H	H	H	A	A	A	H	H	A	-	H	H	H	H	H	H	B	H	H	H	A	H	H
8326	A03	26606146	B	-	B	B	H	H	H	H	A	H	B	B	H	H	H	A	A	B	H	H	H	A	B	A	H	H	H	A	A	A	B	H	A	B	H	H	H	H	H	H	B	H	H	H	A	H	H
8330	A03	26630827	B	A	B	B	H	H	H	H	A	H	B	B	H	H	H	A	H	B	H	H	H	-	B	A	H	H	H	A	A	A	B	H	A	B	H	H	H	H	H	H	B	H	H	H	-	H	H
8344	A03	26775022	B	-	B	B	H	H	H	H	A	H	B	B	H	H	H	A	-	B	H	A	H	A	B	A	H	H	H	A	A	-	B	H	A	B	H	H	H	H	H	H	H	H	H	H	-	H	H
8345	A03	26777189	B	A	B	B	H	H	H	H	A	H	B	B	H	H	H	A	A	B	H	A	H	A	B	A	H	H	H	A	A	A	-	H	A	B	H	H	H	H	H	H	H	H	H	H	A	H	H
8412	A03	27230696	H	A	B	B	H	H	H	H	-	H	B	-	-	H	H	-	-	B	H	A	-	A	B	A	H	H	H	A	-	A	-	H	-	B	H	H	H	H	H	H	H	H	H	H	A	-	H
8415	A03	27289563	H	A	B	B	H	H	H	H	A	H	B	B	H	H	H	A	A	B	H	-	H	A	B	A	H	H	H	A	A	A	B	H	-	B	H	H	H	H	H	H	H	-	H	H	A	H	H
8422	A03	27363147	H	A	B	B	H	H	H	H	A	H	B	B	H	H	H	A	A	B	H	A	H	A	B	A	H	H	H	A	A	A	B	H	A	B	H	H	H	H	H	H	H	H	H	H	A	H	H
8433	A03	27483143	H	A	B	B	H	H	-	H	A	-	H	-	H	H	H	A	A	B	H	-	H	-	B	A	H	H	H	A	-	A	-	H	A	-	H	H	H	H	H	H	H	H	H	H	-	H	H
8444	A03	27579826	H	A	B	B	H	H	H	H	A	H	H	B	H	H	H	A	A	B	H	A	H	A	B	A	H	H	H	A	A	A	-	H	A	B	H	B	H	H	H	H	H	H	H	H	A	H	H
8453	A03	27621091	H	A	B	B	H	H	H	H	A	H	H	B	H	H	H	A	A	B	H	A	H	A	B	A	H	H	H	A	A	A	B	H	A	B	H	B	H	H	H	H	H	H	H	H	A	H	H
8454	A03	27621094	H	A	-	-	H	-	H	H	-	H	H	B	H	H	H	A	A	B	H	A	H	A	B	A	H	H	H	-	A	A	B	H	A	B	H	B	-	H	H	H	H	H	H	H	A	H	H
8457	A03	27641954	H	A	B	B	H	H	H	H	A	H	H	B	H	H	H	A	A	B	H	A	H	A	B	-	H	H	H	-	A	A	B	H	A	B	H	B	H	H	H	H	H	H	H	H	A	H	H
8461	A03	27703240	H	A	B	B	H	H	H	H	A	H	H	-	H	H	H	A	A	B	H	A	H	A	B	A	H	H	H	A	A	A	B	H	A	B	H	B	H	H	H	H	H	H	H	H	A	H	H
8482	A03	2792906	B	B	-	H	H	H	H	A	H	H	H	A	H	H	B	H	B	H	H	H	H	B	H	H	A	H	H	H	B	H	H	A	A	A	A	B	B	H	B	H	H	H	H	H	B	H	H
8512	A03	28220384	H	A	B	B	A	H	H	H	A	H	H	H	H	H	H	A	A	B	H	A	H	-	-	A	H	H	H	A	H	A	-	H	A	-	H	B	H	H	H	H	H	H	H	H	A	H	H
8516	A03	28243656	-	-	B	B	A	H	H	-	-	H	H	H	-	-	H	-	A	B	H	A	H	A	B	A	H	H	H	A	H	A	-	H	-	-	H	B	H	H	H	H	H	H	H	H	A	H	H
8524	A03	28320314	H	A	B	B	A	H	H	H	A	H	H	-	H	H	H	A	A	B	H	A	H	A	B	A	H	H	H	A	H	A	B	H	A	B	H	B	H	H	H	H	H	H	H	H	A	H	H
8531	A03	28359323	H	A	B	B	A	H	H	H	A	H	H	H	H	H	H	A	-	-	H	A	H	A	B	A	H	H	H	A	H	A	-	H	A	B	H	-	H	H	H	H	H	H	H	H	A	H	-
8535	A03	28391670	H	A	B	B	A	H	H	H	A	H	H	H	H	H	H	A	-	B	H	A	H	A	B	A	H	H	H	A	H	A	B	H	A	B	H	B	H	H	H	H	H	H	H	H	A	H	H
8576	A03	28739279	H	A	H	B	A	H	H	H	A	H	H	H	H	H	H	A	-	B	H	A	H	A	B	A	H	H	H	A	H	A	B	H	-	B	H	B	-	H	H	H	H	H	-	H	A	H	H
8588	A03	28819063	H	A	H	B	A	H	H	H	A	H	H	H	H	H	H	A	A	B	H	A	H	A	B	A	H	H	H	-	H	A	B	H	A	B	H	B	H	H	H	H	H	H	H	H	A	H	H
8616	A03	29022654	H	A	H	B	A	H	H	H	A	H	H	H	H	H	H	A	A	B	H	A	H	A	B	A	H	H	H	A	H	A	B	H	A	B	H	B	H	H	H	H	H	H	H	H	A	H	H
8618	A03	29034840	H	A	H	B	A	H	H	H	A	H	H	H	H	H	H	A	A	B	H	-	H	A	-	A	H	H	H	A	H	A	-	H	A	-	H	B	H	H	H	H	H	H	H	H	A	-	H
8619	A03	29037277	H	A	H	B	A	H	H	H	A	H	H	H	H	H	H	A	-	B	H	A	H	A	B	A	H	H	H	A	H	A	B	H	A	B	H	B	H	H	H	H	H	H	H	H	A	H	H
8624	A03	2907907	B	B	H	H	H	H	H	A	H	H	H	A	H	H	B	H	B	H	H	H	H	B	H	A	A	H	H	H	B	H	H	A	A	A	A	-	-	H	B	B	H	H	H	H	B	H	H
8632	A03	2914888	B	B	H	H	H	-	H	A	H	H	H	-	H	H	B	H	-	H	H	H	H	B	H	A	A	H	H	H	B	H	H	A	A	A	A	B	B	H	B	B	H	H	H	H	B	H	H
8666	A03	29444757	H	A	H	B	A	H	H	H	-	H	-	H	H	H	H	-	A	B	H	A	H	A	B	-	H	H	H	A	H	A	B	H	A	B	H	B	H	H	H	H	-	H	H	H	-	H	H
8695	A03	29732050	H	A	H	B	A	H	H	H	A	H	H	H	H	H	H	A	A	B	A	A	H	A	B	A	H	H	H	A	H	A	B	H	A	B	H	B	H	H	H	H	H	H	H	H	A	H	H
8698	A03	29751894	H	H	-	A	A	A	-	H	-	H	A	A	H	B	A	H	H	A	A	H	H	A	H	H	H	H	H	H	H	H	B	A	A	H	H	A	H	H	H	A	H	H	B	B	A	H	A
8701	A03	29804433	H	A	H	B	A	H	H	H	A	H	H	H	H	H	H	A	A	-	A	A	H	A	B	A	H	H	H	A	H	A	-	-	-	B	H	B	H	H	H	H	H	H	H	H	A	H	H
8710	A03	29919975	H	H	H	H	A	H	H	-	A	A	H	H	A	H	H	H	H	H	H	H	H	H	A	H	H	A	A	H	A	H	A	A	A	H	H	A	A	H	H	A	H	H	H	H	H	A	H
8720	A03	30041295	H	A	H	B	A	H	H	H	A	H	H	H	H	H	H	A	A	B	A	A	H	A	B	A	H	H	H	A	H	A	B	H	A	B	H	B	H	H	H	H	H	H	H	H	A	H	H
8733	A03	30169335	H	A	H	B	A	H	H	H	A	H	H	H	H	H	H	A	A	B	A	A	H	A	B	A	H	H	H	A	H	A	B	H	A	B	H	B	H	H	H	H	H	H	H	H	A	H	H
8735	A03	30173042	H	-	H	B	A	H	H	H	A	H	H	H	H	H	H	A	A	B	A	A	H	A	-	A	H	H	H	A	H	A	B	H	A	B	H	B	H	H	H	H	H	H	H	H	A	H	H
8746	A03	30293560	H	A	H	B	H	H	H	H	A	H	H	H	H	H	H	A	A	B	A	A	H	A	B	-	H	H	H	A	H	A	B	H	A	B	H	B	H	H	-	H	H	H	H	H	A	H	H
8753	A03	30348524	H	A	H	-	A	H	H	H	A	H	H	H	H	H	H	-	A	B	A	A	H	A	B	A	H	H	H	A	H	A	B	H	-	B	-	B	H	H	-	H	H	H	H	H	A	H	H
8762	A03	30383888	H	-	H	B	A	H	H	H	A	H	H	H	H	H	H	A	A	B	A	A	H	-	B	A	H	H	H	A	H	A	B	H	A	B	H	B	H	H	-	H	H	H	H	H	A	H	H
8763	A03	30393074	H	A	H	B	A	H	H	H	A	H	H	H	H	H	H	A	A	B	A	A	H	A	-	A	H	-	H	A	H	A	B	H	A	-	H	B	H	H	-	H	H	H	H	H	A	H	H
8929	A03	31700485	H	H	H	H	H	H	H	H	H	H	H	H	H	-	H	H	H	H	H	H	H	H	H	H	H	H	H	H	H	H	H	H	H	H	H	H	H	H	H	H	H	H	H	H	H	H	H
8956	A03	3246780	B	B	A	H	H	H	H	A	A	H	H	A	H	H	B	H	B	H	H	H	H	B	H	A	A	H	H	H	B	H	H	A	A	A	A	A	B	H	B	B	H	H	H	A	B	H	H
8963	A03	3269075	B	B	A	H	H	H	H	A	A	H	H	A	H	H	B	H	B	H	H	H	H	B	H	A	A	H	H	H	B	H	H	A	A	-	A	A	B	H	B	B	H	H	H	A	B	H	H
8964	A03	3269078	B	B	H	H	H	H	H	A	A	H	H	A	H	H	B	H	B	H	H	H	H	B	H	A	-	H	H	H	B	H	H	A	A	A	A	A	H	H	B	B	H	H	H	A	B	H	H
8965	A03	3272672	B	B	A	H	H	H	H	A	A	H	H	A	H	H	B	H	B	H	H	H	H	B	H	A	A	H	H	H	B	H	H	A	A	A	A	A	B	H	B	B	H	H	H	A	B	H	H
9014	A03	3543069	B	B	A	H	H	H	H	A	A	H	H	A	H	H	B	H	B	H	H	H	H	B	H	A	-	H	H	H	B	H	-	-	A	H	A	A	B	H	B	B	H	H	H	A	B	H	H
9027	A03	3593343	B	B	A	H	H	H	H	A	A	H	H	A	H	H	B	H	B	H	H	H	H	B	H	A	A	H	H	H	B	H	H	A	A	H	A	A	-	H	B	B	H	H	H	A	B	H	H
9047	A03	3692247	B	B	-	H	H	H	H	A	A	H	H	A	H	H	B	H	B	H	H	H	H	H	H	A	A	H	H	H	B	H	H	A	A	H	A	-	B	H	B	-	H	H	H	A	B	H	H
9048	A03	3693414	B	B	A	H	H	H	H	A	A	H	H	A	H	H	B	H	B	H	H	H	H	H	-	A	A	H	H	H	-	H	H	A	A	H	A	A	-	H	B	B	H	H	H	A	B	H	H
9053	A03	3704699	B	B	-	H	H	H	H	A	A	H	H	A	H	H	B	H	B	H	H	H	H	H	H	-	A	H	H	H	B	H	H	A	A	H	A	-	-	H	B	B	H	H	H	A	-	H	H
9071	A03	3816446	B	-	-	H	H	H	H	A	A	H	H	-	H	H	B	H	B	H	H	H	H	H	H	A	A	H	H	H	B	H	H	A	A	H	A	-	B	H	B	B	H	H	H	A	B	H	H
9086	A03	3941889	H	H	H	H	H	H	H	A	A	H	H	A	H	H	H	H	H	H	H	H	H	H	H	H	-	H	H	H	H	H	H	A	A	H	A	A	H	H	H	H	H	H	H	A	H	H	H
9091	A03	3964721	B	B	A	H	H	H	H	A	A	H	H	A	H	H	B	H	B	H	H	H	H	H	H	A	A	H	H	H	B	H	H	H	A	H	-	-	B	H	B	-	H	H	H	A	B	H	H
9133	A03	4221322	H	H	H	H	H	H	H	H	H	H	H	H	H	H	H	H	H	H	A	H	A	H	A	H	A	A	H	H	H	H	H	H	H	H	H	A	H	H	H	-	H	H	H	A	H	H	H
9163	A03	4501128	B	B	A	H	H	H	H	A	A	H	H	A	H	H	B	H	B	H	-	H	H	H	H	H	A	H	H	H	B	H	H	H	A	H	-	A	B	-	B	B	H	H	H	A	B	H	H
9170	A03	4545106	B	B	A	H	H	H	H	A	A	H	H	A	H	H	B	-	B	H	H	H	H	H	H	H	A	H	H	H	B	H	H	H	A	H	A	A	-	A	B	-	H	H	H	A	-	H	H
9172	A03	4547372	B	B	-	H	H	H	H	A	A	H	H	A	H	H	B	H	B	H	H	H	H	H	H	H	A	H	H	H	B	H	H	H	A	-	-	A	B	-	B	-	H	H	H	A	B	H	-
9174	A03	4549320	B	B	-	H	H	H	H	-	A	H	H	A	H	H	B	H	B	H	H	H	H	H	H	H	A	H	H	H	-	H	H	H	A	H	A	A	B	A	B	B	H	H	H	A	B	H	H
9221	A03	4980097	B	B	A	H	H	H	H	-	A	H	H	A	H	H	B	H	B	H	H	H	H	H	H	H	A	H	H	H	B	H	H	H	A	H	A	A	B	A	B	H	H	H	-	A	B	H	H
9223	A03	4980436	B	B	A	H	H	H	H	A	A	H	H	A	H	H	B	H	B	H	H	H	H	H	H	H	A	H	H	H	B	H	H	H	A	H	A	A	B	A	B	H	H	H	H	A	B	H	H
9225	A03	4981478	-	B	A	H	H	H	H	A	A	H	H	A	H	H	-	H	B	H	H	H	H	H	H	H	A	H	H	H	B	H	H	H	A	H	A	A	B	A	B	H	H	H	H	A	B	H	H
9226	A03	4983927	B	B	A	H	H	H	H	A	A	H	-	A	-	H	B	H	B	H	H	H	H	H	H	H	A	H	H	H	-	H	H	H	A	H	A	A	B	-	B	H	H	H	H	A	B	H	H
9227	A03	4983930	B	B	A	H	H	H	H	A	A	H	H	A	H	H	B	H	B	H	H	H	H	H	H	H	A	H	H	H	B	H	H	H	A	H	A	A	B	A	B	H	H	H	H	A	B	H	H
9228	A03	4985998	B	B	A	H	H	H	H	A	A	H	H	A	H	H	B	H	B	-	H	H	H	H	H	-	A	H	H	H	B	-	H	H	-	H	A	A	B	A	B	H	H	H	H	A	B	-	H
9232	A03	5000439	B	B	A	H	H	H	H	A	A	H	H	A	H	H	B	H	B	H	H	H	H	H	H	H	A	H	H	H	B	H	H	H	A	H	A	A	B	A	B	H	H	H	H	A	B	H	H
9234	A03	5004739	B	B	A	H	H	H	H	A	A	H	H	A	H	H	B	H	B	H	H	H	H	H	H	H	A	H	H	H	B	H	H	H	A	H	A	A	B	A	B	H	H	H	H	A	B	H	H
9252	A03	5154366	B	B	A	H	H	H	H	A	A	H	H	A	H	H	B	H	B	H	H	H	H	H	H	H	A	H	H	H	B	H	H	H	A	H	A	A	B	A	B	H	H	H	H	A	B	H	H
9285	A03	5380181	B	B	A	H	H	H	H	A	A	H	H	-	H	H	B	H	B	H	H	H	H	H	H	H	A	H	H	H	B	H	H	H	A	H	A	A	B	A	H	H	-	-	H	A	-	H	-
9373	A03	6496398	B	H	A	H	H	H	H	A	A	H	H	A	H	H	B	H	B	H	B	H	H	H	H	H	H	H	H	-	B	H	H	H	A	H	A	A	B	A	H	H	A	A	H	A	B	H	H
9380	A03	6515962	B	H	A	H	H	H	H	A	A	H	H	A	H	H	B	H	B	H	B	H	H	H	H	H	H	H	H	B	B	H	H	H	A	H	A	A	B	A	H	H	A	A	H	A	B	H	H
9416	A03	6756764	-	H	-	-	H	H	H	A	A	H	H	A	H	H	B	H	-	H	B	H	H	H	H	H	H	H	H	-	H	H	H	H	-	H	-	A	B	-	H	H	-	A	H	A	-	H	H
9428	A03	6841897	H	H	A	H	H	H	H	A	A	H	H	A	H	H	H	H	H	H	H	H	H	H	H	H	-	H	H	H	H	H	H	H	A	H	A	A	H	H	H	H	H	H	H	A	H	H	H
9439	A03	696971	A	H	A	H	H	H	H	A	H	A	H	H	A	H	A	A	B	A	A	H	H	B	A	H	A	H	H	H	H	H	H	A	H	H	H	A	A	H	H	A	H	H	H	H	H	H	A
9451	A03	7078967	B	H	H	H	H	H	H	A	A	H	H	A	H	H	B	H	B	H	B	H	H	H	H	H	H	H	H	B	H	-	H	H	A	H	A	A	B	-	H	H	A	A	H	A	B	H	-
9488	A03	7372646	B	H	H	H	H	H	H	A	A	H	H	-	H	H	-	H	B	H	B	H	H	H	H	H	H	H	H	B	-	H	H	-	H	H	A	A	B	A	H	H	A	A	H	A	B	H	H
9504	A03	7513092	B	H	H	H	H	H	-	A	A	H	H	A	H	H	B	H	B	H	B	H	H	H	H	H	H	H	H	B	H	H	H	H	H	H	A	A	B	A	H	-	-	A	H	A	B	H	H
9548	A03	7803753	-	H	H	H	H	H	H	A	A	H	H	-	H	H	-	H	B	H	B	H	H	H	H	H	H	H	H	-	H	H	H	H	H	H	A	-	B	H	H	H	A	A	H	A	B	H	-
9553	A03	783313	B	B	H	H	H	A	H	A	H	H	B	A	B	H	B	B	B	H	H	H	B	B	-	-	A	H	H	H	B	H	H	A	H	A	A	-	-	H	B	H	H	H	H	H	H	H	A
9577	A03	7948040	B	H	H	H	H	H	H	A	-	-	H	-	H	-	B	H	B	H	B	H	H	H	H	H	H	-	H	B	H	H	H	H	H	H	A	A	B	H	H	H	-	A	H	A	B	H	H
9580	A03	7952154	B	H	H	H	H	H	H	A	A	H	H	A	H	H	-	H	-	H	B	H	H	-	H	H	H	H	H	-	H	H	H	H	H	H	A	A	B	H	H	H	A	A	H	A	B	H	H
9584	A03	8019687	B	H	H	H	H	H	H	A	A	B	H	A	H	H	B	H	B	H	B	H	H	H	H	H	H	H	H	B	H	H	H	H	H	H	A	A	B	H	H	H	-	A	H	-	B	H	H
9597	A03	8054728	B	H	H	H	H	H	H	-	A	-	H	-	H	H	B	H	B	H	B	H	H	H	H	H	H	H	H	B	H	H	H	H	H	H	A	A	B	H	H	H	-	A	H	A	-	H	H
9599	A03	8092295	B	H	H	H	H	H	H	A	A	-	H	A	-	H	B	H	-	H	B	H	H	H	H	H	H	H	H	B	-	H	H	H	H	H	-	A	B	H	H	H	-	A	H	A	B	H	H
9600	A03	8093035	B	H	H	H	H	H	H	A	A	B	H	A	H	H	-	H	B	H	B	H	H	H	H	H	H	H	H	B	H	H	H	H	H	H	A	A	B	H	H	H	A	A	H	A	B	H	H
9603	A03	8104987	B	H	H	H	H	H	H	A	-	B	H	A	H	H	B	H	B	H	B	H	H	H	H	H	H	H	H	B	H	H	H	H	H	H	A	A	B	H	H	H	A	A	H	A	B	H	H
9604	A03	8106200	B	H	H	H	H	H	H	A	A	B	H	A	H	H	B	H	B	H	B	H	H	H	H	-	H	H	H	B	H	-	H	H	-	H	-	-	B	H	H	H	-	A	H	-	B	H	-
9605	A03	8106233	B	H	H	H	H	H	H	A	A	B	H	A	H	H	-	H	-	H	B	H	H	H	H	H	H	H	H	B	H	H	H	H	H	H	A	A	B	H	H	H	A	A	H	A	B	H	H
9627	A03	8232799	-	H	H	H	H	H	H	A	A	B	H	-	H	H	B	H	B	H	-	H	H	H	H	H	H	H	H	-	H	H	H	H	H	H	A	A	B	H	H	H	-	A	H	A	B	H	H
9630	A03	8251744	-	H	H	H	H	H	H	A	A	B	H	A	H	H	B	H	-	H	B	H	H	H	H	H	H	H	H	B	H	H	H	H	H	H	-	A	B	H	H	H	A	A	H	A	B	H	H
9632	A03	8256157	B	H	H	H	H	H	H	A	A	B	H	A	H	H	-	H	B	H	-	H	H	H	H	H	H	H	H	B	H	H	H	H	H	H	A	A	B	H	H	H	A	-	H	A	B	-	H
9642	A03	8300572	B	H	H	H	H	H	H	A	A	B	H	-	H	H	B	H	B	H	B	H	H	H	H	H	H	H	H	B	H	H	H	H	H	H	A	A	B	H	H	H	A	A	H	A	B	H	H
9646	A03	8309096	B	H	H	H	H	H	H	A	A	B	H	A	H	-	B	H	B	H	B	H	H	H	H	H	H	H	H	B	H	H	H	H	H	H	A	A	-	H	H	H	A	A	H	A	B	H	H
9648	A03	8327094	-	H	H	H	H	H	H	A	A	B	H	A	H	H	B	H	B	H	B	H	H	H	H	H	H	-	H	B	H	H	H	H	H	H	A	A	H	H	H	H	A	A	H	A	B	H	H
9659	A03	840225	B	B	H	H	H	A	H	-	H	H	-	A	B	H	B	-	B	H	H	H	B	B	H	H	A	H	H	H	B	H	H	A	H	A	A	B	B	H	B	H	H	H	H	H	H	H	A
9660	A03	8406582	-	H	H	H	H	H	H	A	A	B	H	A	-	H	B	H	B	H	B	H	H	H	H	H	H	H	H	B	H	H	H	H	H	H	A	A	B	H	H	H	A	A	H	A	B	H	H
9669	A03	845923	B	B	H	H	H	A	H	-	H	H	B	A	B	H	B	B	B	H	H	-	B	B	H	H	A	H	H	H	B	H	H	A	H	A	A	B	B	H	B	H	H	H	H	H	H	H	A
9674	A03	848824	B	B	H	H	H	A	H	A	H	H	-	A	B	H	B	B	-	H	H	H	-	B	H	-	A	H	H	H	B	H	H	A	H	A	A	B	B	H	B	H	H	H	H	H	H	H	A
9676	A03	849913	B	B	H	H	H	A	H	A	H	-	B	A	B	H	B	B	B	H	H	H	B	B	H	H	A	H	H	H	B	H	H	A	H	A	A	B	B	-	B	H	H	H	H	H	H	H	A
9698	A03	8727896	B	H	-	H	H	H	H	A	A	B	H	A	H	H	B	H	H	H	B	H	H	H	H	H	H	H	H	B	H	H	-	H	H	H	A	A	B	H	H	H	A	A	H	A	B	H	H
9739	A03	913354	B	B	H	H	H	-	H	A	H	H	B	A	B	H	B	B	B	H	H	H	B	B	H	H	A	H	-	-	B	H	H	A	H	A	A	B	B	H	B	-	H	-	H	H	B	H	A
9768	A03	9316421	H	H	H	H	H	H	H	H	A	B	H	A	H	H	B	H	H	H	B	H	H	A	H	H	H	H	H	B	A	H	H	H	H	H	A	A	B	H	H	H	A	A	A	A	B	H	H
9775	A03	9342285	H	H	H	H	H	H	H	H	-	B	H	A	H	H	B	H	A	H	B	H	H	A	H	H	H	H	H	B	A	H	-	H	H	H	A	A	B	H	H	H	A	A	H	A	B	H	H
9818	A03	9664691	-	H	H	H	H	H	H	H	A	B	H	A	H	H	-	H	-	H	B	A	H	-	H	H	-	B	H	B	A	H	H	H	H	H	A	-	B	H	H	H	-	A	H	H	B	H	H
9824	A03	9673755	H	H	H	H	H	H	H	H	A	B	H	A	H	H	B	H	A	H	B	A	H	A	H	H	H	B	H	B	A	H	H	H	H	H	A	A	B	H	H	H	A	A	H	H	B	H	H
9830	A03	9735658	H	H	H	H	H	H	H	H	A	B	H	A	H	H	B	H	A	H	B	A	H	A	H	H	H	B	H	B	A	H	H	H	H	H	A	A	-	H	H	H	A	A	H	H	B	H	H
9837	A03	9828929	H	H	H	H	H	H	H	H	A	B	H	A	H	H	B	H	A	H	B	A	H	A	H	H	H	B	H	-	A	H	H	H	H	H	A	A	B	H	H	H	A	A	H	H	B	H	H
9850	A03	9858623	H	B	H	H	H	H	H	H	A	B	H	A	H	H	B	H	A	H	B	A	H	A	H	H	H	B	H	B	A	H	H	H	H	H	A	A	B	H	H	H	A	A	H	H	B	H	H
9853	A03	9864646	H	B	-	H	H	H	H	H	A	-	H	-	H	H	B	H	A	H	B	A	H	A	H	H	H	B	H	-	A	H	H	H	-	H	-	A	-	H	H	H	A	A	H	H	B	H	H
9887	A04	10201949	B	H	B	H	A	H	H	A	H	A	H	H	H	A	B	H	H	H	H	B	A	A	H	B	A	B	H	H	A	B	B	B	H	A	A	H	A	B	H	B	A	H	H	A	-	B	B
9891	A04	10237189	B	H	B	H	A	H	H	A	H	A	H	H	H	A	B	H	H	H	H	B	-	A	H	B	A	B	H	H	A	B	B	B	H	A	A	-	-	B	H	B	-	H	H	A	B	B	B
9892	A04	10237865	-	H	B	-	A	H	H	-	H	-	H	H	-	A	B	H	H	H	H	-	A	-	H	-	A	B	-	H	-	B	B	B	H	A	A	H	A	B	H	B	-	H	H	-	B	B	B
9893	A04	10237868	B	H	B	H	A	H	H	A	H	A	H	-	H	A	B	H	H	H	-	B	A	-	H	-	-	B	H	H	A	-	B	-	H	A	-	H	A	-	H	B	A	H	H	A	B	B	B
9897	A04	10240400	B	H	-	H	A	H	H	A	H	-	H	H	H	A	B	H	-	H	H	B	A	A	H	B	A	B	H	H	A	B	B	B	H	A	A	H	A	B	H	-	A	H	H	A	B	B	B
9898	A04	10257169	B	H	B	H	-	H	H	A	H	-	H	H	H	A	B	H	H	H	H	B	-	-	H	-	A	-	H	H	A	-	B	B	H	-	A	H	A	-	H	-	A	H	H	A	-	B	B
9901	A04	1031766	B	H	H	H	A	B	A	A	A	A	H	H	H	H	B	A	A	H	A	B	H	H	H	B	-	H	B	B	A	B	B	H	B	A	A	-	A	B	H	A	A	H	H	A	H	A	B
9915	A04	10443936	B	H	B	H	A	H	H	A	H	A	H	H	H	A	B	H	H	H	H	B	A	A	H	B	A	B	H	H	A	B	B	B	H	A	A	H	A	B	H	-	A	H	H	A	B	B	B
9921	A04	10517012	B	H	B	H	A	H	H	A	H	A	H	H	H	A	B	H	H	H	H	B	A	A	H	B	A	B	H	-	A	B	B	B	H	A	A	H	A	B	H	-	A	H	H	A	B	B	B
9936	A04	10734474	B	H	-	H	A	H	H	-	H	-	H	H	H	A	B	H	H	H	H	B	-	A	H	B	A	B	H	B	-	B	B	B	H	A	A	H	A	B	H	B	A	H	H	A	B	B	B
9967	A04	11177601	B	H	B	H	A	H	H	A	H	A	H	H	H	A	A	H	H	H	H	H	A	A	H	B	-	B	H	B	A	B	B	-	H	A	H	H	H	-	H	H	A	H	H	A	B	B	B
9977	A04	11251328	B	H	B	H	A	H	H	-	H	A	H	H	H	A	A	H	H	H	H	H	A	A	-	B	A	B	H	B	A	B	-	B	H	A	H	H	A	B	H	H	-	H	H	-	B	B	B
9991	A04	11390483	-	H	B	H	A	H	H	A	H	A	H	H	H	A	A	H	H	H	H	H	A	A	H	B	H	B	H	B	A	B	B	B	H	A	H	H	A	B	H	H	A	H	H	A	B	B	B
9997	A04	11534599	-	H	B	H	A	H	H	A	-	A	H	H	H	A	-	H	H	H	H	H	A	A	H	B	A	B	H	B	-	B	B	B	H	A	H	H	A	B	H	H	A	H	H	A	B	B	B
9998	A04	11534602	B	H	B	H	A	H	H	A	H	A	H	H	-	A	A	H	H	H	H	H	A	A	H	B	A	B	H	B	A	B	B	B	H	A	H	H	A	-	H	H	A	-	H	A	B	B	B
10000	A04	11545357	B	H	B	H	A	H	H	A	H	A	H	H	H	H	A	H	H	H	H	H	A	A	H	B	A	B	H	B	A	B	B	B	H	A	H	H	A	B	H	H	A	H	H	A	B	B	B
10009	A04	11578648	B	H	B	H	A	H	H	A	H	A	H	H	H	H	A	H	H	H	H	H	A	A	H	B	A	B	H	B	A	B	B	B	H	A	H	H	A	B	H	H	A	H	H	A	B	B	B
10013	A04	11612600	B	H	B	H	A	H	H	A	H	-	H	H	-	-	A	H	H	H	H	H	A	A	-	B	-	B	H	B	A	B	-	H	H	-	-	-	A	B	H	-	A	H	H	A	H	B	B
10023	A04	11712789	H	H	H	H	H	H	H	H	H	H	H	H	-	H	H	H	A	H	H	-	H	H	-	H	H	H	H	H	H	H	H	H	H	H	H	H	H	H	H	H	A	H	H	H	H	H	H
10024	A04	11712792	H	H	H	H	-	H	H	H	A	H	H	A	H	H	H	H	A	H	H	A	H	A	H	H	H	H	H	H	A	H	H	H	H	H	A	A	H	H	H	H	A	A	H	H	H	H	H
10027	A04	11720578	B	H	B	H	A	H	H	A	H	-	H	-	H	H	A	H	H	H	H	H	A	A	H	B	A	B	H	B	A	B	B	H	H	A	H	H	A	B	H	H	-	H	H	A	H	B	B
10029	A04	11737979	B	H	-	H	A	H	H	A	H	A	H	H	H	H	A	H	H	H	H	H	A	A	H	B	A	B	H	B	A	B	B	H	H	A	H	H	A	B	H	H	A	H	H	A	H	B	B
10040	A04	11853678	B	H	B	H	A	H	H	A	H	A	H	H	H	H	A	H	H	H	H	H	A	A	H	B	A	B	H	B	A	B	B	H	H	A	H	H	A	B	H	H	A	H	H	A	H	B	B
10047	A04	11911573	-	H	B	H	A	H	H	A	H	A	H	H	H	H	A	H	H	H	H	H	A	A	H	B	A	B	H	B	-	B	B	H	H	A	H	H	A	B	H	H	A	H	H	A	H	B	B
10051	A04	11933846	-	H	B	H	A	H	H	A	H	A	H	H	H	H	A	H	H	H	H	H	A	A	H	-	A	B	H	B	A	B	B	H	H	A	H	H	A	B	H	H	-	H	H	A	H	B	B
10052	A04	11933849	B	H	B	H	A	H	H	A	H	A	H	H	H	H	A	H	H	H	H	H	A	A	H	B	A	B	H	B	A	B	B	H	H	A	H	H	A	B	H	H	A	H	H	A	H	B	B
10055	A04	11968420	B	H	B	H	A	H	H	A	H	-	H	H	H	H	A	H	H	H	H	H	A	A	H	B	A	B	H	B	A	B	B	H	H	A	H	H	A	B	H	H	A	H	H	A	H	B	B
10070	A04	12079185	B	H	B	H	A	H	H	A	H	A	H	H	-	H	A	H	H	H	H	-	A	A	H	B	A	B	H	B	A	B	B	H	H	A	H	H	A	B	H	H	A	H	-	A	H	-	B
10074	A04	12086721	B	H	B	H	A	H	H	A	H	A	-	H	H	H	A	H	H	H	H	H	A	A	H	B	A	B	H	B	A	B	B	H	H	A	H	H	A	B	H	H	A	H	H	A	H	B	B
10086	A04	12257135	B	H	B	H	A	H	H	-	H	-	H	H	H	H	-	H	H	H	-	H	A	A	H	-	A	B	H	B	A	-	B	H	H	A	H	H	A	B	H	H	A	H	H	A	H	-	-
10103	A04	12369649	B	H	B	H	A	H	H	A	H	-	H	H	H	H	A	H	H	H	H	H	A	A	H	B	A	B	H	B	-	B	B	H	H	A	H	H	A	B	H	H	-	H	H	A	H	B	B
10118	A04	12456065	B	H	B	H	A	H	H	A	H	A	H	H	H	H	A	H	H	H	H	H	A	A	H	B	A	B	H	B	A	B	B	H	H	A	H	H	A	B	H	H	A	H	H	A	H	B	B
10144	A04	12701795	B	H	-	H	A	H	H	A	H	A	H	H	H	H	A	H	H	H	H	H	A	A	H	B	A	B	H	B	-	B	-	H	H	A	H	H	A	B	H	H	A	H	H	A	H	B	B
10151	A04	12768646	B	H	B	H	-	H	H	A	H	-	H	H	H	H	A	H	H	H	H	H	A	A	H	B	A	B	H	B	A	B	B	H	H	A	H	H	A	B	H	H	-	H	H	A	H	-	B
10152	A04	12768838	B	H	-	H	A	H	H	A	H	A	H	H	H	H	-	H	H	H	H	H	A	-	H	-	A	-	H	B	A	B	B	H	H	A	-	H	A	-	H	H	A	H	H	A	H	B	B
10153	A04	12768841	-	H	-	H	A	H	H	A	H	-	H	H	H	H	A	H	H	-	H	H	A	-	H	B	A	B	H	B	A	-	-	H	H	A	H	H	A	-	H	H	-	H	H	-	H	-	-
10154	A04	12769811	B	H	B	H	A	H	H	-	H	A	H	H	-	-	A	H	H	H	-	H	A	A	H	-	-	B	H	B	A	B	B	H	H	A	H	H	A	B	H	H	A	-	H	A	H	-	B
10155	A04	12769814	B	H	B	H	A	H	H	A	H	-	H	H	H	H	A	H	H	H	H	H	A	A	H	B	-	B	H	B	A	B	-	H	H	A	H	H	-	B	H	H	A	H	H	A	H	B	B
10161	A04	12803072	B	H	B	H	-	H	H	A	H	-	H	H	H	H	A	H	H	H	H	H	A	A	H	B	A	B	H	B	-	B	B	H	H	A	H	H	A	B	H	H	A	H	H	A	H	B	B
10171	A04	12881675	B	H	B	H	A	H	H	A	H	A	H	H	H	H	A	H	H	H	H	H	A	A	H	-	A	B	H	B	-	B	-	H	H	A	H	H	A	B	H	-	A	H	H	A	H	B	B
10172	A04	12888855	B	H	B	H	A	H	H	A	H	-	H	H	H	H	A	H	H	H	H	H	A	A	H	B	A	B	H	B	-	B	B	H	H	-	H	H	-	B	H	H	A	H	H	A	H	B	B
10178	A04	12929028	B	H	B	H	A	H	H	A	H	A	H	-	H	H	A	H	H	H	H	H	A	A	H	B	A	B	H	B	A	B	B	H	H	A	H	H	A	B	H	H	A	H	H	A	H	B	B
10179	A04	12930025	B	H	B	H	A	H	H	A	H	A	H	H	H	H	A	H	H	H	H	H	A	A	H	B	A	B	H	B	A	B	B	H	H	A	H	H	A	B	H	H	A	H	H	A	H	B	B
10180	A04	12945302	B	H	B	H	A	H	H	A	H	-	H	H	H	H	A	H	H	H	H	H	A	A	H	B	A	B	H	B	-	B	B	H	H	A	H	H	H	B	H	H	A	H	H	A	H	B	B
10182	A04	1296939	B	H	H	H	A	B	A	A	-	A	H	H	H	H	-	A	A	H	A	B	H	H	H	B	A	H	B	-	A	B	B	H	B	A	A	-	A	B	H	A	A	H	H	A	H	A	B
10184	A04	13005950	B	H	B	H	A	H	H	A	H	A	H	H	H	H	-	H	H	H	H	H	A	A	H	B	A	B	H	B	-	B	B	H	H	A	H	-	A	B	H	H	A	H	H	A	H	B	B
10207	A04	13209596	B	H	B	H	A	H	H	A	H	A	H	H	A	H	A	H	H	H	H	H	A	A	H	-	A	B	H	B	-	B	-	H	H	A	B	H	A	B	H	H	A	H	H	-	H	B	B
10208	A04	13209599	B	H	-	H	A	H	H	A	H	A	H	-	-	H	A	H	H	H	H	H	A	A	H	-	A	B	H	B	A	-	-	H	H	A	B	H	A	B	H	H	A	H	H	-	H	B	-
10209	A04	13215014	H	-	B	H	A	H	H	A	H	A	H	H	A	H	A	H	H	H	H	H	A	A	H	B	A	-	H	B	A	-	B	H	H	A	B	H	A	B	H	H	A	H	H	A	H	B	B
10210	A04	13247538	H	H	B	H	A	H	H	A	H	-	H	H	A	H	A	H	H	H	H	H	A	A	H	B	A	B	H	B	A	B	B	H	H	A	B	-	A	B	H	H	A	H	H	A	H	B	B
10216	A04	13332182	H	H	-	H	A	H	H	A	H	A	H	H	A	H	-	H	H	H	H	H	A	A	H	-	A	B	H	B	A	B	B	H	H	A	B	H	A	B	H	H	A	H	H	A	H	B	B
10245	A04	13684522	H	H	H	H	H	H	H	A	A	H	H	A	H	H	H	H	H	H	H	H	H	H	H	H	A	H	H	H	H	H	H	A	A	H	A	A	H	H	H	H	H	H	H	A	H	H	H
10285	A04	13950145	H	H	B	H	A	H	H	-	H	A	H	H	A	H	A	H	H	H	H	H	A	H	H	B	A	B	-	B	A	B	B	H	H	-	-	H	A	-	H	H	A	H	H	-	H	B	B
10310	A04	14119679	H	H	B	H	-	H	H	A	H	A	H	H	A	H	A	H	H	H	H	H	A	H	H	B	A	B	H	B	A	B	B	H	H	H	B	H	A	B	H	H	A	H	H	A	H	B	-
10316	A04	14200302	H	H	B	H	A	H	H	A	H	A	H	H	A	-	A	H	H	H	H	H	H	H	H	-	A	B	H	B	A	B	B	H	H	H	B	H	A	B	H	H	A	H	H	A	H	B	B
10324	A04	14231851	H	H	B	H	A	H	H	A	H	A	H	H	A	H	A	H	H	H	H	H	H	H	H	B	A	B	H	B	A	B	B	H	H	H	B	H	-	B	H	H	A	H	H	A	H	B	B
10325	A04	14232098	H	H	B	H	A	H	H	A	H	A	H	H	A	H	A	-	H	H	H	H	H	H	H	-	A	B	H	B	A	B	B	H	H	H	B	H	-	B	H	H	-	H	H	A	H	-	B
10341	A04	14376743	H	H	-	H	A	H	H	A	H	A	H	H	A	H	A	H	H	H	H	H	H	H	H	B	A	B	H	B	A	B	B	H	H	H	B	H	A	B	H	H	A	H	H	A	H	B	B
10346	A04	14430025	H	H	-	H	A	H	H	A	H	A	H	H	A	H	A	H	H	H	H	H	H	H	H	B	A	B	H	B	A	B	B	-	H	-	B	H	A	B	H	H	A	H	H	A	H	B	B
10351	A04	14453107	H	H	B	H	A	H	H	A	H	A	H	H	A	H	A	H	H	H	H	H	H	H	H	B	A	B	H	B	A	B	B	H	H	H	B	H	A	B	H	H	A	H	H	A	H	H	B
10355	A04	14489856	H	H	B	H	A	H	H	A	H	A	H	H	A	H	A	H	H	H	H	H	H	H	H	B	A	B	H	B	A	B	B	H	H	H	B	H	A	B	H	H	A	H	H	A	H	H	B
10365	A04	14555418	H	H	B	-	A	H	H	A	H	A	A	H	A	H	A	H	H	H	H	H	H	H	H	B	A	B	A	-	-	B	B	H	H	H	-	H	-	B	H	H	A	H	H	A	H	H	-
10368	A04	14583177	H	H	-	H	A	H	H	A	H	A	A	H	A	H	A	H	H	H	H	H	H	H	H	B	A	B	-	B	A	B	B	H	H	H	B	H	A	B	H	H	A	H	H	A	H	H	-
10382	A04	14755501	H	H	B	H	-	H	H	A	H	A	-	H	A	H	A	H	H	H	H	H	H	H	H	B	A	-	A	-	A	-	-	H	H	H	B	H	H	B	H	B	A	H	H	A	H	H	B
10384	A04	14758224	H	H	-	H	A	H	H	A	H	A	A	H	A	H	A	H	H	H	H	H	H	H	H	B	-	B	A	-	-	-	B	H	H	H	-	H	-	B	H	-	A	H	H	A	H	H	B
10440	A04	15180547	B	H	H	H	B	A	H	H	H	H	A	A	H	B	-	H	B	B	A	A	H	H	A	A	A	H	H	B	A	-	B	H	H	H	B	B	H	B	H	H	B	A	H	H	A	H	A
10444	A04	15222127	H	H	B	H	A	H	H	A	A	A	A	H	-	H	A	H	H	H	B	H	H	H	H	H	A	B	-	B	A	B	H	H	H	H	B	A	A	B	H	B	A	H	H	A	H	H	B
10461	A04	15374798	H	H	B	H	A	H	H	A	A	A	A	H	A	H	A	H	H	H	-	H	H	H	H	H	A	-	-	-	-	B	H	H	H	H	B	A	A	B	H	B	A	H	H	A	H	H	H
10484	A04	15559779	H	H	B	H	A	H	H	A	A	A	-	H	A	H	A	H	H	H	B	H	H	H	H	H	A	B	A	B	A	B	H	H	H	H	B	A	A	-	H	B	A	H	H	A	H	H	H
10487	A04	15601128	H	H	B	A	A	H	H	A	A	A	-	H	A	H	A	H	H	H	B	H	H	H	H	H	A	B	A	-	-	B	H	H	H	H	B	A	A	B	-	B	A	H	H	A	H	H	H
10488	A04	15602173	H	H	B	A	A	H	H	A	A	A	A	H	A	H	-	H	H	-	B	H	H	H	H	H	A	-	A	-	A	B	H	H	H	H	B	A	-	B	H	-	-	-	H	A	H	H	H
10511	A04	1587209	B	H	H	H	A	B	H	A	A	A	H	H	H	H	-	A	A	H	A	B	A	H	H	B	A	H	H	B	-	B	B	H	B	A	A	H	A	B	H	H	A	H	H	A	H	A	B
10529	A04	16059782	H	H	B	A	A	H	H	A	A	A	A	H	-	H	A	H	H	B	B	H	H	H	H	H	H	B	A	-	A	B	H	H	H	H	B	A	A	B	H	B	A	H	H	A	H	H	H
10533	A04	16102947	H	H	-	A	A	H	H	A	A	A	A	H	A	H	A	H	H	B	B	H	H	H	H	H	H	B	A	H	A	B	H	H	H	H	B	A	-	B	H	B	A	H	H	A	H	H	H
10538	A04	16150375	H	H	B	A	A	H	H	A	A	A	A	H	A	H	A	H	H	B	B	H	H	H	H	H	H	B	A	H	A	B	H	H	H	H	B	A	A	B	H	B	A	H	H	-	H	H	H
10551	A04	16276867	H	H	B	-	A	H	H	A	A	A	-	H	A	H	A	H	H	B	B	H	H	H	H	H	H	B	A	H	A	B	H	H	H	H	B	A	-	B	H	B	A	H	H	A	H	H	H
10560	A04	16439172	H	H	B	A	A	H	H	A	A	A	A	H	A	H	A	H	H	B	B	H	H	H	H	H	H	B	A	H	H	B	H	H	H	H	B	A	A	B	H	B	A	H	H	A	H	H	H
10562	A04	16453068	H	H	B	-	A	H	H	A	A	-	A	H	A	H	A	H	H	B	-	H	H	H	H	H	H	B	A	H	H	B	H	H	H	H	B	-	A	B	H	B	A	H	H	A	H	H	H
10564	A04	16497844	H	H	-	A	A	H	H	A	A	A	A	H	A	H	A	H	H	B	B	H	H	H	H	H	H	B	A	H	H	B	H	H	H	H	B	A	-	B	H	B	A	H	H	A	H	H	H
10578	A04	16628116	H	H	B	A	A	H	H	A	A	A	A	H	-	H	A	-	H	B	B	H	H	H	H	H	H	B	A	H	H	H	H	H	H	H	B	A	A	-	H	B	A	A	H	A	H	H	H
10620	A04	17062545	H	H	-	A	A	H	H	A	A	H	A	H	A	B	A	H	H	B	B	H	H	H	H	H	H	B	A	H	H	H	H	H	H	H	B	-	A	B	H	B	A	A	H	A	H	H	A
10623	A04	17065404	H	H	H	A	A	H	H	A	A	H	A	H	A	B	A	H	H	B	B	H	H	H	H	H	H	B	A	H	H	H	H	H	H	H	B	A	A	B	H	B	A	A	H	A	H	H	A
10639	A04	17209641	H	H	H	A	A	H	H	A	A	H	A	H	-	B	A	H	H	B	-	H	H	H	H	H	H	B	A	H	H	-	H	H	H	H	B	A	-	B	H	B	A	A	H	A	H	H	-
10680	A04	17582266	-	H	-	H	H	H	B	H	A	B	B	H	B	A	H	A	H	H	H	A	H	-	H	B	H	H	H	A	H	H	H	B	H	-	A	H	A	A	H	H	B	B	A	H	H	B	-
10700	A04	17715209	H	H	H	H	A	H	H	A	A	H	A	H	A	B	A	H	B	B	B	H	H	H	A	H	B	H	A	H	H	H	H	H	H	H	B	A	B	B	A	B	A	A	H	H	H	H	A
10707	A04	17737162	H	H	H	H	A	H	-	A	A	H	A	-	A	-	A	H	B	B	-	H	H	-	A	H	B	H	A	H	H	H	H	H	H	H	B	A	B	B	-	B	A	A	H	H	H	-	A
10713	A04	17792110	H	H	H	H	A	H	H	A	A	H	A	H	A	B	A	H	B	B	B	H	H	H	A	H	B	H	A	H	H	H	H	H	H	H	B	A	B	B	A	B	A	A	H	H	H	H	A
10714	A04	17793345	H	H	H	H	A	H	H	A	A	H	A	H	A	B	A	H	-	B	-	H	-	H	A	H	B	H	A	H	H	H	H	H	H	H	B	A	B	-	A	B	A	A	H	H	-	H	A
10715	A04	17793348	H	H	H	H	A	H	H	A	A	H	A	H	A	B	-	H	-	B	B	H	H	H	-	H	B	H	-	H	H	H	H	H	H	H	B	-	B	B	-	B	-	A	H	H	H	H	A
10720	A04	17829023	H	H	H	H	A	-	H	A	A	H	A	H	A	B	A	H	B	-	B	H	H	H	A	H	B	H	A	H	H	H	H	H	H	H	B	A	B	-	A	B	A	A	H	H	H	H	-
10730	A04	17874761	H	H	H	H	A	H	H	A	A	H	A	H	A	B	A	H	B	B	-	H	H	H	A	H	B	H	-	H	H	A	H	H	H	H	B	H	B	H	A	B	A	A	H	H	H	H	A
10737	A04	17923029	H	H	H	H	A	H	H	A	A	H	A	H	A	B	-	H	B	B	-	H	H	H	-	H	-	H	A	H	H	A	H	H	H	-	-	-	B	B	A	B	A	A	H	H	H	H	A
10744	A04	17961181	H	H	H	H	H	H	H	A	A	H	A	H	A	B	A	H	B	B	B	H	H	H	A	H	B	H	A	H	H	A	H	H	H	H	B	A	B	B	A	B	H	A	H	H	H	H	A
10781	A04	18184601	H	H	H	H	H	H	H	A	A	H	A	A	A	B	A	H	B	B	B	H	H	H	A	H	B	H	A	H	H	A	H	H	H	H	B	A	B	B	A	B	H	A	H	H	H	H	A
10792	A04	18236951	H	H	H	H	H	H	H	A	A	H	A	A	A	B	A	H	B	B	-	H	H	H	-	H	B	H	A	H	H	A	H	H	H	H	B	A	B	B	A	B	H	-	H	H	H	H	A
10797	A04	18269372	H	H	H	H	H	H	H	A	A	H	A	A	A	B	A	H	B	B	B	H	H	H	A	H	B	H	A	H	H	A	H	H	H	H	B	A	B	B	A	-	H	A	H	H	H	H	A
10799	A04	18292721	H	H	H	H	H	H	H	A	A	H	A	A	A	B	-	H	B	B	B	H	H	H	A	H	B	H	A	H	H	A	H	H	H	H	B	A	B	B	A	B	H	A	H	H	H	H	-
10800	A04	18292724	H	H	H	H	H	H	H	A	A	H	A	A	A	B	A	-	-	-	B	H	H	H	A	H	-	H	A	H	H	A	H	H	H	H	B	A	B	B	A	B	H	A	H	H	H	H	A
10807	A04	18352285	H	H	H	H	H	H	H	A	A	H	A	A	A	B	-	H	B	B	B	H	H	H	A	H	B	H	A	H	H	A	H	H	H	H	B	-	B	B	A	-	H	A	H	H	H	H	A
10837	A04	18546464	H	H	H	H	H	H	H	A	A	H	A	-	A	B	-	H	B	-	-	H	H	H	A	A	-	H	-	H	H	A	H	H	H	H	-	A	B	B	A	B	H	-	H	H	H	H	-
10871	A04	18813382	H	H	H	H	H	H	H	A	A	H	-	A	A	B	A	H	B	-	B	H	H	H	A	A	B	H	A	H	H	A	H	H	H	H	B	A	B	B	A	B	H	A	H	H	H	H	A
10872	A04	18813385	H	H	H	H	H	H	H	A	-	H	-	A	-	-	-	H	B	B	B	-	H	-	A	A	B	H	A	H	H	-	H	H	H	H	B	A	B	B	A	B	H	A	H	H	H	H	A
10879	A04	18849422	H	H	H	H	H	H	H	A	A	H	A	A	A	B	A	H	B	B	B	H	H	H	A	A	B	H	A	H	H	A	H	H	H	H	B	A	B	-	A	B	H	A	H	-	H	H	A
10881	A04	18855554	H	H	H	H	H	H	H	A	A	-	A	A	A	B	A	H	B	B	B	H	H	H	A	A	B	H	A	H	H	A	H	H	H	H	B	A	B	-	A	B	H	A	H	H	H	H	A
10885	A04	18893677	-	H	H	H	H	H	H	A	H	H	A	A	A	B	A	H	B	B	B	H	H	H	A	-	B	H	A	H	H	A	H	H	H	H	B	-	B	B	A	H	H	A	H	H	H	H	A
10899	A04	19035049	H	H	H	H	H	H	H	A	H	H	A	A	A	B	A	B	B	B	-	H	H	H	A	-	B	H	A	H	H	A	H	H	H	H	B	A	B	B	A	H	H	A	H	H	H	H	A
10928	A04	1937910	B	H	H	H	A	B	H	-	A	A	H	H	H	H	B	A	H	H	A	B	A	H	H	B	A	H	H	B	A	-	B	H	-	A	A	H	A	-	H	H	A	H	H	A	H	A	-
10970	A04	2229467	H	H	H	H	A	H	H	A	A	-	H	H	H	H	H	A	H	H	A	H	-	H	H	H	A	-	H	H	A	H	H	H	H	A	A	H	A	H	H	H	-	H	H	A	H	A	H
10980	A04	2274316	B	H	H	H	A	B	H	A	A	A	H	H	H	H	B	-	H	H	A	B	A	H	H	-	A	H	H	B	A	B	B	H	B	A	A	H	A	B	H	H	A	-	H	A	H	A	B
10994	A04	2417624	B	H	H	H	A	B	H	A	A	A	H	H	H	H	B	A	H	H	A	B	A	H	H	B	A	H	H	B	A	B	B	H	B	A	A	H	A	B	H	H	A	H	H	A	H	A	B
10996	A04	2469340	B	H	H	H	A	B	H	A	A	A	H	H	H	H	B	A	H	H	A	B	A	H	H	B	A	H	H	B	A	B	B	H	B	A	-	H	A	B	H	H	A	H	H	A	H	A	B
11001	A04	2505923	B	H	H	H	A	B	H	A	A	A	H	H	H	H	B	A	H	H	A	B	A	H	H	B	A	H	H	B	A	-	B	H	B	A	A	H	A	B	H	H	A	H	H	A	H	-	B
11008	A04	261345	B	H	H	A	H	B	A	A	A	A	H	H	H	H	B	H	A	H	A	B	H	H	A	B	A	H	B	B	A	B	B	H	B	H	A	A	H	B	H	A	H	H	H	A	H	A	B
11009	A04	261348	B	H	H	A	H	B	A	A	A	A	H	H	H	H	B	H	A	H	A	B	H	H	A	B	A	H	B	B	-	B	B	H	B	H	A	A	H	B	H	A	H	H	H	A	H	A	B
11026	A04	281453	B	A	-	B	H	H	H	H	H	B	B	A	B	B	A	B	H	H	B	A	B	A	H	H	H	H	H	A	H	B	A	B	B	H	H	H	H	A	H	B	-	B	A	-	H	H	B
11032	A04	2843651	B	H	H	H	A	B	H	A	A	A	H	H	H	H	B	-	H	H	A	B	A	H	H	B	A	H	H	B	A	B	B	H	B	A	A	H	-	B	H	H	A	H	H	A	H	A	B
11062	A04	3107998	-	A	-	H	H	H	H	A	A	H	-	H	-	H	H	H	H	-	-	H	-	-	A	H	H	H	H	H	H	H	H	-	H	A	-	H	H	H	H	H	H	A	H	H	H	H	H
11074	A04	3188681	B	H	H	H	A	B	H	A	A	A	H	H	H	H	B	A	H	H	A	B	A	H	H	B	A	H	H	B	A	B	B	H	B	A	A	H	A	B	H	H	A	H	H	A	H	A	B
11088	A04	3272004	B	H	H	H	A	B	H	A	A	A	H	H	H	H	B	A	H	H	-	B	-	H	H	B	-	H	H	B	A	B	B	H	B	A	A	H	A	B	H	H	-	H	H	A	H	A	B
11096	A04	3308521	B	H	H	H	A	B	H	A	A	A	H	H	H	H	B	A	H	H	A	B	A	H	H	B	A	H	H	B	A	B	B	H	B	A	A	H	A	B	H	H	A	H	H	A	H	A	B
11112	A04	3441475	B	H	H	H	A	B	H	A	A	A	H	H	H	H	B	A	H	H	A	B	A	H	H	B	A	B	H	B	A	B	B	H	B	A	-	H	-	B	H	H	A	H	H	A	H	A	B
11120	A04	3545265	-	A	H	H	A	B	H	A	A	A	H	H	H	H	H	A	H	H	A	B	A	H	-	B	A	B	H	B	A	B	B	H	B	A	-	H	A	B	H	H	A	H	H	A	H	A	-
11121	A04	3545268	B	H	H	H	-	B	H	A	A	-	H	H	H	H	B	A	H	H	A	B	A	H	H	B	A	B	H	B	A	B	B	H	B	A	A	H	A	B	H	H	A	H	H	A	H	A	-
11122	A04	3548564	B	H	H	-	A	B	H	A	-	A	H	-	H	H	B	A	H	H	-	-	A	H	H	-	A	-	H	B	A	-	B	H	B	A	A	H	A	B	H	H	A	H	H	A	H	-	B
11126	A04	3569180	-	H	H	H	A	B	H	A	A	-	H	-	H	H	B	A	H	H	A	B	A	H	H	B	A	B	H	B	A	B	B	H	B	A	A	H	A	B	H	H	A	H	-	A	H	A	B
11135	A04	3621060	-	H	H	H	A	B	H	A	A	A	H	H	H	H	B	A	H	H	A	B	A	H	H	B	A	B	H	B	A	B	B	H	B	A	A	H	A	B	H	H	A	H	H	A	H	A	B
11148	A04	3718091	B	H	H	H	-	B	H	A	A	A	H	H	H	H	B	A	H	H	A	B	A	H	H	B	A	B	H	B	A	B	B	H	B	A	A	H	A	B	H	H	A	H	H	A	H	A	B
11162	A04	3775407	B	H	H	H	A	B	H	A	A	A	H	H	H	H	B	A	H	H	-	-	A	-	H	-	A	B	H	B	-	B	-	H	B	A	A	H	A	B	H	H	A	H	H	A	H	-	B
11175	A04	3959612	B	H	H	H	A	B	H	-	H	A	H	H	H	H	B	A	H	H	A	B	A	H	H	B	A	B	H	B	A	B	-	H	-	A	A	H	-	B	H	H	A	H	-	A	H	A	B
11176	A04	3963864	-	H	H	H	A	B	H	H	H	A	H	H	H	H	B	A	H	-	A	-	A	H	H	H	A	B	H	B	A	B	B	H	B	A	A	H	A	B	H	H	A	H	H	A	H	A	B
11189	A04	4134214	B	H	H	H	A	B	H	A	H	A	H	H	H	A	B	A	H	H	A	B	A	H	H	B	A	B	H	B	A	B	B	H	B	A	A	H	A	B	H	H	A	H	H	A	H	A	B
11192	A04	4182557	B	H	H	H	A	B	H	-	H	A	H	H	H	-	-	A	H	H	A	B	A	H	H	-	A	B	H	-	A	B	B	H	B	A	A	H	A	B	H	-	-	H	H	-	H	A	-
11214	A04	4350361	B	H	H	H	A	B	H	A	H	A	H	-	H	H	H	A	H	H	A	B	A	H	H	B	A	B	H	B	A	B	B	H	B	A	A	H	A	-	H	H	A	H	H	A	H	A	-
11226	A04	453334	B	H	H	A	H	B	A	A	A	A	H	H	H	H	B	H	A	H	A	B	H	H	A	B	A	H	B	B	A	B	B	H	B	A	A	A	A	B	H	A	H	H	H	A	H	A	B
11231	A04	4576274	B	H	H	H	A	B	H	-	H	A	H	H	H	-	B	A	H	H	-	B	A	H	H	B	A	B	H	B	A	B	B	H	B	A	A	H	-	B	H	H	A	H	H	A	H	A	B
11239	A04	4635625	B	H	H	H	A	B	H	A	H	A	H	H	H	-	B	A	H	H	-	B	A	H	H	B	A	B	H	B	-	B	B	H	B	A	-	H	-	B	H	H	A	H	H	A	H	A	B
11241	A04	4641014	B	H	H	H	A	B	H	A	H	-	H	H	H	A	B	A	H	H	A	B	-	H	H	B	A	-	H	B	A	-	-	H	-	A	A	H	A	B	H	H	-	H	H	A	H	A	B
11242	A04	4641017	B	H	H	H	A	B	H	A	H	-	H	H	H	A	B	-	H	H	-	B	A	H	H	B	A	B	H	B	-	B	B	H	B	A	A	H	A	B	H	H	A	H	H	A	H	A	B
11268	A04	4911935	B	H	H	H	A	B	H	A	H	A	H	H	H	A	B	A	H	H	A	B	A	H	H	B	A	B	H	B	A	B	B	H	B	A	A	H	A	B	H	H	A	H	H	A	H	A	B
11278	A04	503460	B	H	H	A	H	B	A	A	A	A	H	H	H	H	B	H	A	H	A	B	H	H	-	-	A	H	B	B	A	-	B	H	B	A	A	A	A	B	H	A	H	H	H	A	H	A	B
11299	A04	5246912	-	H	H	H	A	B	H	A	H	A	H	H	H	A	B	-	H	H	A	B	A	H	H	B	A	B	H	B	A	B	B	H	B	A	A	H	A	B	H	H	A	H	H	A	H	A	B
11328	A04	5563672	B	H	H	H	A	B	H	A	H	-	H	H	H	A	B	A	H	H	H	B	A	H	H	-	A	B	H	B	A	B	B	H	H	A	A	H	H	B	H	H	A	H	H	A	H	A	B
11330	A04	5582546	B	H	-	H	A	B	H	A	H	A	H	H	H	A	-	-	H	H	H	B	A	H	H	B	A	B	H	B	A	B	B	H	H	-	-	H	-	B	H	H	-	H	H	A	H	A	B
11331	A04	5582549	B	H	H	H	A	B	H	A	H	A	H	H	H	A	B	A	H	H	H	B	A	H	H	B	A	B	H	B	A	B	B	H	H	A	A	H	-	B	H	H	A	H	H	A	H	A	B
11344	A04	5643171	B	H	H	H	A	B	H	A	H	A	H	H	H	A	B	A	H	H	H	B	A	H	H	-	A	B	H	B	-	B	B	H	H	A	A	H	-	B	H	H	A	H	H	A	H	A	B
11345	A04	5643495	-	-	H	H	-	B	H	A	H	A	H	H	H	A	-	A	H	H	H	-	A	H	H	B	A	-	-	B	-	B	B	H	H	A	A	H	-	B	H	H	A	H	H	A	H	A	B
11349	A04	5656252	B	H	H	-	A	B	H	A	H	A	H	H	H	A	B	A	H	H	H	B	A	H	H	B	A	B	H	B	-	B	B	H	H	A	A	H	-	B	H	H	A	H	H	A	H	A	B
11350	A04	5657066	B	H	H	H	A	B	H	A	H	A	H	H	H	-	B	A	H	H	H	B	-	-	H	B	A	B	H	B	A	B	B	H	H	A	A	H	A	B	H	H	-	H	H	A	H	A	B
11362	A04	5727393	B	H	H	H	A	B	H	A	H	A	H	H	H	A	-	A	H	H	H	B	A	H	H	B	-	B	H	B	A	-	B	H	H	A	A	H	A	B	H	H	A	H	H	A	H	A	B
11366	A04	5729874	B	H	H	H	A	B	H	A	H	A	H	H	H	-	-	-	H	H	H	-	A	H	H	B	A	B	H	B	A	B	B	H	H	A	A	H	A	B	H	H	A	H	H	A	H	A	B
11371	A04	5745273	H	H	H	H	-	H	H	-	-	A	H	H	H	A	H	A	H	H	H	H	-	H	-	H	A	H	H	H	-	H	H	H	H	A	-	H	H	H	H	H	A	H	H	A	H	A	H
11372	A04	5745276	B	H	H	H	A	B	H	A	H	A	H	H	H	A	B	A	H	H	H	B	A	H	H	B	-	B	H	B	A	B	B	H	H	A	A	H	A	B	H	H	A	H	H	A	H	A	B
11373	A04	5745540	H	H	H	H	-	H	H	H	H	H	H	H	-	H	H	A	H	A	-	H	H	-	H	H	H	H	H	H	H	H	H	H	H	-	H	-	A	H	H	H	H	H	H	H	-	H	H
11375	A04	5755440	B	H	H	H	A	B	H	A	H	A	H	H	H	A	B	A	H	H	H	B	-	H	H	B	A	B	H	B	A	B	B	H	H	A	A	H	-	-	H	H	A	H	H	A	H	A	B
11447	A04	6143778	B	H	H	H	A	B	H	A	H	A	H	H	H	A	B	A	H	H	H	B	A	H	H	B	A	B	H	B	A	B	B	H	H	A	A	H	A	B	H	B	A	H	H	A	H	A	B
11453	A04	6262433	A	H	A	H	H	H	H	A	H	A	H	H	A	H	A	A	H	A	-	H	H	H	A	H	A	H	H	H	H	H	H	A	A	A	H	A	A	H	H	A	H	H	H	H	H	H	A
11464	A04	6417262	B	H	H	H	A	B	H	A	H	A	-	H	H	A	B	A	H	H	H	B	A	H	H	B	A	B	H	B	-	B	B	H	H	A	A	H	A	B	H	B	A	H	H	-	H	A	-
11504	A04	675837	B	H	H	A	H	B	A	A	-	A	H	H	H	H	B	H	A	H	A	B	H	H	A	B	A	H	-	B	A	B	B	H	B	A	-	A	A	-	H	A	H	H	H	A	H	-	B
11588	A04	746396	H	H	H	A	H	H	A	A	A	A	H	H	H	H	H	H	A	H	A	H	H	H	H	H	A	H	H	H	A	H	H	H	H	A	A	A	A	H	H	A	H	H	H	A	H	A	H
11628	A04	7936752	B	H	B	H	A	B	H	A	H	A	H	H	H	A	B	A	H	H	H	B	-	H	B	B	-	B	H	H	A	B	B	H	H	A	A	H	A	B	H	B	A	-	H	A	H	H	B
11630	A04	7942006	B	H	B	-	-	B	H	A	H	A	H	H	H	-	B	A	H	H	H	-	A	H	B	B	-	B	H	-	A	-	B	H	H	-	-	H	-	B	H	B	-	H	H	A	H	H	B
11638	A04	8097508	B	H	B	H	A	B	H	A	H	A	H	H	H	A	B	A	H	H	H	B	A	H	B	B	A	B	H	H	A	B	B	H	H	A	A	H	A	B	H	B	A	H	H	A	B	H	B
11643	A04	8213653	-	H	B	H	-	-	H	-	H	A	H	H	H	A	B	A	H	H	H	-	-	-	B	-	A	B	H	H	-	B	B	H	H	A	-	H	A	-	H	B	-	H	H	A	B	H	B
11648	A04	8265761	B	H	B	H	A	B	H	A	H	A	H	H	H	A	B	A	H	H	H	B	A	H	B	B	A	B	H	H	A	B	B	H	H	A	A	H	A	B	H	B	A	H	H	A	B	H	B
11652	A04	82920	B	H	H	A	H	B	-	A	A	A	H	H	H	H	-	H	A	H	-	B	H	-	A	B	-	H	B	B	A	B	B	H	B	H	-	A	H	B	H	-	H	H	H	A	H	A	-
11662	A04	8381317	B	H	B	H	A	B	H	A	H	A	H	H	H	A	B	A	H	H	H	B	A	H	B	-	A	B	H	H	A	B	B	H	H	A	A	H	A	-	H	B	A	H	H	A	B	H	B
11722	A04	8792621	H	H	A	H	-	A	H	H	H	H	H	H	H	H	H	H	H	H	H	-	H	A	H	A	A	A	H	A	H	H	H	-	A	-	H	H	H	H	H	H	H	-	H	H	H	H	H
11730	A04	8917026	B	H	-	H	-	B	H	A	H	A	H	H	H	A	B	A	H	H	H	-	A	H	B	B	A	B	H	H	A	B	-	H	H	A	A	H	A	-	H	B	-	H	H	A	B	H	B
11735	A04	9017683	B	H	B	H	A	B	H	A	H	A	H	H	H	A	-	A	H	H	H	B	A	H	B	B	A	B	H	H	A	B	B	H	H	A	A	H	A	B	H	B	A	H	H	A	B	H	B
11740	A04	9073249	B	H	B	H	A	B	H	-	H	A	H	H	H	A	B	A	H	H	H	B	A	H	B	B	-	B	H	H	A	B	B	B	H	A	-	H	H	B	H	B	A	H	H	A	B	H	B
11741	A04	9075696	B	H	-	H	A	-	H	A	H	A	H	H	H	A	B	A	H	H	H	-	A	H	B	-	-	B	H	H	A	B	-	H	H	A	A	H	A	B	H	B	A	H	H	A	B	H	-
11743	A04	9095225	B	H	B	H	A	B	H	A	H	A	H	H	-	A	B	A	H	H	H	B	A	H	B	B	A	B	H	H	-	B	-	H	H	A	A	H	A	B	H	B	A	H	H	A	B	H	B
11745	A04	9144234	B	H	B	H	A	B	H	A	H	A	H	H	H	A	B	A	H	H	H	-	A	H	B	B	A	B	H	H	-	-	-	H	H	A	A	H	A	B	H	B	A	H	H	-	B	H	-
11754	A04	923702	B	H	H	H	A	B	A	A	A	A	H	H	H	H	B	H	A	H	-	B	H	H	-	B	A	H	B	B	A	B	B	H	B	A	A	A	A	H	H	A	H	H	H	A	H	A	B
11774	A04	944286	B	H	H	H	A	B	A	A	-	A	H	H	H	H	B	H	A	H	A	B	H	H	H	B	A	H	B	-	A	-	B	H	B	A	A	A	A	B	H	-	H	H	H	A	H	A	B
11776	A04	9462672	B	H	B	H	A	B	H	A	H	A	H	H	H	A	B	H	H	H	H	B	A	H	B	B	-	B	H	H	A	B	B	H	H	A	A	H	-	-	H	B	A	H	H	A	-	-	B
11778	A04	9471092	B	H	B	H	A	B	H	-	H	A	H	H	H	A	B	H	H	H	H	B	A	H	B	-	-	B	H	H	A	B	-	B	H	A	A	H	A	B	H	B	A	H	H	A	B	H	B
11779	A04	9471095	B	H	B	H	A	B	H	A	H	A	H	H	H	A	B	H	H	H	H	B	A	H	B	-	A	B	H	H	A	B	B	B	H	A	A	H	A	B	H	B	A	H	H	A	B	H	B
11797	A04	9586690	B	H	B	H	A	B	H	A	H	A	H	H	H	A	B	H	H	H	H	B	A	H	B	B	A	B	H	H	A	B	B	B	H	A	A	H	-	B	H	-	A	H	H	A	B	-	B
11802	A04	9633271	B	H	B	H	A	B	H	A	H	-	H	H	H	A	B	H	H	H	H	B	A	H	-	B	A	B	H	H	A	B	B	B	H	A	A	H	-	B	H	B	A	A	-	A	B	B	B
11808	A04	9663539	B	H	-	H	A	B	H	A	H	A	H	H	H	A	B	H	H	H	H	-	A	H	B	B	A	B	H	H	A	B	B	B	H	A	A	H	A	B	H	B	A	H	H	A	B	B	B
11824	A04	9867330	-	H	B	H	-	H	H	A	H	A	H	H	-	-	B	H	H	H	H	B	A	H	B	B	-	B	H	H	-	B	B	B	H	A	A	H	A	B	H	B	A	H	H	-	B	B	B
11827	A04	9868344	B	H	B	H	A	H	H	A	H	A	H	H	H	A	H	H	H	H	H	B	A	H	B	-	A	B	H	H	A	B	-	B	H	A	A	H	A	B	H	B	A	H	H	A	B	B	B
11843	A04	9895304	B	H	B	H	A	H	H	-	H	A	H	H	H	A	B	H	-	H	H	B	A	H	H	B	A	B	H	H	A	B	B	B	H	A	A	H	A	-	H	-	-	-	H	A	B	B	B
11952	A05	10831925	B	H	H	H	H	A	H	H	H	H	A	A	H	B	H	H	B	-	A	-	H	H	A	A	A	H	H	B	A	B	B	A	H	H	B	B	H	B	H	H	B	A	H	H	-	H	A
11966	A05	10897435	B	H	H	H	H	A	H	H	H	H	A	A	H	B	H	H	B	-	A	A	H	H	A	A	-	H	H	B	A	B	B	-	H	H	B	B	H	B	H	H	B	A	H	H	A	H	A
11969	A05	10959701	H	H	A	B	B	A	B	H	H	H	H	H	H	H	H	B	H	H	H	A	H	A	B	A	A	A	B	A	H	H	B	H	H	H	H	B	B	H	H	H	B	H	B	H	H	H	B
11972	A05	11022927	B	H	H	H	H	A	H	H	H	H	A	A	H	B	H	H	B	B	A	A	H	H	A	A	A	H	H	B	A	B	B	-	H	H	B	B	H	B	H	H	B	A	H	H	A	H	A
11978	A05	11101829	B	H	H	H	H	A	H	H	H	H	A	A	H	B	H	H	B	B	A	A	H	H	A	A	A	H	H	B	-	B	B	-	H	H	B	B	H	B	H	H	B	A	H	H	A	H	A
11979	A05	11101832	B	H	H	H	H	A	H	H	H	H	A	A	H	B	H	H	B	B	A	A	H	H	A	A	A	H	H	B	A	B	B	A	H	H	B	B	H	B	H	H	B	A	H	H	A	H	A
12015	A05	11323277	B	H	H	H	H	A	H	H	H	H	A	A	H	B	A	H	B	B	-	A	H	H	A	A	A	H	H	B	A	B	B	A	H	H	B	B	H	B	H	H	-	A	H	H	A	H	A
12023	A05	11443857	B	H	H	H	H	-	-	H	H	H	-	-	H	B	A	H	B	B	A	A	H	H	-	-	A	H	H	B	A	-	-	A	H	H	B	-	H	B	H	H	B	A	H	H	A	H	-
12048	A05	11721945	B	H	H	H	H	A	H	-	H	H	A	-	H	B	A	H	B	B	A	-	H	H	-	A	-	H	H	B	A	-	B	-	H	H	B	B	H	-	H	H	B	A	H	H	A	H	A
12051	A05	1176352	H	H	-	B	B	H	A	H	B	H	H	-	-	H	H	B	A	H	-	H	-	A	H	A	H	A	H	B	-	H	H	H	H	A	B	-	H	H	B	H	H	H	B	H	A	H	-
12057	A05	11834981	B	H	H	H	H	A	H	H	H	H	A	A	H	B	A	H	B	B	A	A	H	H	A	A	A	H	H	B	A	B	B	A	H	H	B	B	H	B	H	H	B	A	H	H	A	H	A
12063	A05	11870588	H	H	H	H	H	H	H	H	H	H	H	H	H	H	H	H	H	H	-	A	H	H	H	H	A	H	H	H	H	H	H	H	H	H	H	H	H	H	H	H	H	H	H	H	H	H	H
12083	A05	11970531	H	H	A	H	H	A	H	H	H	H	H	H	H	H	H	H	H	H	H	A	H	A	H	A	A	A	H	A	H	H	H	H	-	H	H	H	H	H	A	H	H	H	H	H	H	H	H
12096	A05	12072556	B	H	H	H	H	A	H	H	H	H	A	A	H	B	A	H	B	B	A	A	H	H	A	A	A	H	H	B	A	B	B	A	-	H	B	B	H	B	H	H	-	A	H	H	A	-	A
12098	A05	12080285	-	-	H	-	H	-	-	-	H	H	A	A	H	B	A	H	B	B	A	A	H	H	A	A	A	H	H	-	A	B	B	A	H	-	B	B	H	B	H	H	B	A	H	H	A	H	A
12119	A05	12302828	B	H	H	H	H	A	H	H	H	H	A	A	H	B	A	H	B	B	-	A	H	H	A	A	A	H	H	B	A	B	B	H	H	H	-	B	H	B	H	H	-	A	H	H	-	H	A
12150	A05	12549645	B	H	H	H	H	A	H	H	H	H	A	A	H	B	A	H	B	H	A	A	H	H	A	A	A	H	H	B	A	B	B	H	H	H	B	B	H	B	H	H	B	A	H	H	A	H	A
12151	A05	12561541	B	H	H	H	H	A	H	H	H	H	A	A	H	B	A	H	B	B	A	-	H	H	A	A	A	H	H	B	A	B	B	H	H	H	B	B	H	B	H	H	B	A	H	H	A	H	A
12153	A05	12568289	B	H	H	H	H	A	H	-	H	H	A	A	H	B	A	H	B	B	A	A	H	H	A	A	A	H	H	-	A	B	B	A	H	H	B	B	H	B	-	H	B	A	H	H	A	H	A
12155	A05	12605019	B	H	H	H	H	A	H	H	H	H	A	A	H	B	A	H	B	B	A	A	H	H	A	A	A	H	H	B	A	B	B	H	H	H	B	B	H	B	H	H	B	A	H	H	-	H	A
12199	A05	1283126	H	H	A	-	B	H	A	H	B	H	H	A	H	H	H	B	A	H	A	H	B	A	H	A	H	A	H	B	B	H	H	-	H	A	B	B	H	H	B	H	B	H	B	H	A	H	H
12214	A05	1291582	H	H	A	B	B	H	A	H	B	H	H	A	H	H	H	B	A	H	A	H	B	A	H	A	H	A	H	B	B	H	H	H	-	A	-	-	H	H	B	H	B	H	B	H	A	H	H
12219	A05	1299339	H	H	A	-	B	H	-	H	B	H	H	A	H	H	H	B	A	H	A	H	B	A	H	A	H	A	H	B	B	H	H	H	H	-	B	B	H	H	B	H	B	H	B	H	-	H	H
12230	A05	13056139	B	H	-	H	H	A	H	H	H	H	A	A	H	B	A	H	B	B	A	A	H	H	A	A	A	H	H	B	-	B	B	H	H	H	B	B	H	B	H	H	B	A	H	H	A	H	A
12266	A05	13156872	B	H	H	H	H	A	H	H	H	H	A	A	H	B	A	H	B	B	A	A	H	H	A	A	A	H	H	B	A	B	B	H	H	H	B	B	H	B	H	H	B	A	H	H	A	H	A
12309	A05	13229617	B	H	H	H	H	A	H	H	H	H	A	A	H	B	-	H	B	-	-	A	H	H	A	-	A	H	H	B	A	B	B	-	H	H	B	B	H	B	H	H	-	A	H	H	A	H	A
12343	A05	1342268	H	H	A	B	B	H	A	H	B	H	H	A	H	H	H	B	A	H	A	H	B	-	H	A	H	A	H	B	B	H	H	H	H	H	B	B	H	H	B	H	B	H	B	H	A	H	H
12353	A05	1346246	H	H	A	B	B	H	A	H	-	H	H	A	H	H	H	B	A	H	A	H	B	A	H	A	H	A	H	B	-	H	H	H	H	H	B	B	H	H	B	H	B	H	-	H	A	H	H
12380	A05	13698214	H	H	H	H	H	H	H	H	H	H	H	H	H	-	H	H	-	H	H	H	A	H	H	H	H	H	H	-	-	H	H	H	H	H	-	H	H	H	H	H	H	H	H	-	H	H	H
12389	A05	13768184	H	H	H	H	H	B	B	H	H	B	A	B	A	H	H	H	H	H	B	A	H	A	H	H	A	H	A	H	H	A	A	A	A	-	H	A	B	H	B	H	B	H	H	A	A	B	B
12394	A05	1378370	H	H	A	B	B	H	-	H	B	H	H	A	H	H	H	B	H	B	A	H	B	A	H	A	H	-	H	B	B	-	H	H	H	H	B	B	H	H	B	H	B	H	B	H	A	H	H
12434	A05	14034193	B	H	H	H	H	A	H	H	H	H	A	-	H	B	A	H	B	B	A	A	H	H	A	A	A	H	H	B	A	B	B	H	H	H	B	B	H	B	H	H	B	-	H	H	A	H	A
12468	A05	14332957	-	H	H	H	B	-	H	H	H	H	A	A	-	B	A	H	B	B	A	A	H	H	A	A	A	H	H	B	-	B	B	H	H	-	B	B	H	B	H	H	B	A	H	H	A	H	A
12469	A05	14332960	B	H	H	H	B	A	H	H	H	H	A	A	H	B	A	H	B	H	A	A	H	H	A	A	A	H	H	B	A	B	B	H	H	H	B	B	H	B	H	H	B	A	H	H	A	H	A
12479	A05	14407297	B	H	H	H	B	-	H	H	H	H	A	A	H	B	A	H	-	B	A	A	H	H	A	A	A	H	H	B	H	B	B	H	H	H	B	B	B	B	H	H	B	A	H	H	A	H	A
12482	A05	14429778	H	-	H	H	H	A	B	B	H	H	H	H	H	H	B	H	B	B	H	B	H	H	H	H	A	A	A	H	H	H	A	H	B	H	B	H	B	H	H	A	H	H	A	A	B	H	H
12557	A05	14863477	B	H	H	H	B	A	H	H	H	H	A	A	H	B	A	H	B	B	-	A	H	H	A	A	-	H	H	B	A	B	B	H	H	H	B	B	H	B	H	H	B	A	H	H	A	H	A
12617	A05	15364554	B	H	H	H	B	A	H	H	H	H	A	A	H	B	A	H	B	B	A	A	H	H	A	A	-	H	H	B	A	B	B	H	H	H	B	B	H	B	H	H	B	A	H	H	A	H	A
12631	A05	15441532	B	H	H	H	B	A	H	H	H	-	A	-	H	B	A	H	B	B	A	A	H	H	A	A	A	H	H	B	A	B	B	H	H	H	B	B	H	B	H	H	B	A	H	H	A	H	A
12632	A05	15469590	H	H	-	H	H	H	A	H	-	H	H	H	A	H	H	H	-	H	H	H	H	H	H	H	H	H	H	H	H	H	H	H	H	H	H	H	H	H	H	H	H	A	H	H	H	A	H
12639	A05	15523423	B	H	H	H	B	A	H	H	H	H	A	A	H	B	A	H	B	B	A	A	H	H	A	A	A	H	H	B	A	B	B	H	H	H	B	B	H	B	H	H	B	A	H	H	A	H	A
12640	A05	15536293	B	H	H	H	B	A	H	H	H	H	A	A	H	B	A	H	B	B	A	A	H	H	A	A	A	H	H	B	A	B	B	H	H	H	B	B	H	B	H	H	-	A	H	H	A	H	A
12648	A05	15583048	-	H	H	H	-	A	H	H	H	H	A	A	H	B	A	H	B	B	A	A	H	H	A	A	-	H	H	-	A	B	B	H	H	H	-	B	H	-	H	H	-	-	H	H	A	H	A
12686	A05	1607467	H	H	A	B	B	-	A	H	B	H	H	-	H	H	-	B	H	B	A	-	B	-	H	-	H	-	H	-	-	-	H	H	H	H	B	H	H	H	B	H	B	H	-	H	A	H	H
12820	A05	17586769	H	A	H	H	H	H	H	H	H	H	H	H	A	H	H	A	A	H	H	H	H	A	H	A	H	H	H	A	A	-	H	H	A	H	H	H	H	H	H	H	H	H	H	H	H	H	H
12851	A05	17738059	B	-	H	H	B	A	H	H	H	H	A	A	H	B	A	H	B	B	A	A	H	H	-	A	A	H	H	B	-	B	B	H	H	H	B	B	H	B	H	H	B	A	H	H	A	H	A
12877	A05	17942526	B	H	H	H	B	A	H	H	H	H	A	A	H	B	A	H	B	B	A	A	H	H	A	A	-	H	H	B	A	B	B	H	H	H	B	B	H	B	H	H	B	A	H	H	A	H	A
12879	A05	17959350	B	H	H	H	B	A	H	H	H	H	A	A	H	B	A	-	B	B	A	A	H	H	A	A	A	H	H	B	A	B	B	H	H	H	-	B	H	B	H	H	B	A	H	H	A	H	A
12910	A05	18245027	B	H	H	H	B	A	H	H	H	H	A	A	H	B	A	H	B	-	A	A	H	H	A	A	A	H	H	B	A	B	B	H	H	H	B	B	H	B	H	H	B	A	H	H	A	-	A
12915	A05	18254869	-	H	H	H	B	A	H	H	H	H	A	A	H	B	A	H	B	B	A	A	H	H	A	A	A	H	H	B	A	B	B	H	H	H	B	B	H	B	H	H	B	A	H	H	A	H	A
12916	A05	18281892	B	H	H	H	B	A	H	H	H	H	-	A	H	-	A	H	B	B	A	A	H	H	A	A	A	-	H	B	A	B	B	H	H	H	B	B	H	B	H	H	B	A	-	H	A	-	A
12918	A05	18291403	-	H	H	H	-	-	H	H	H	H	-	A	H	-	A	-	-	B	-	-	H	H	A	A	A	H	H	-	A	B	-	-	H	H	-	B	H	B	H	H	B	A	H	H	A	H	A
12919	A05	18291406	B	H	H	H	B	A	H	H	H	H	-	A	H	B	A	H	-	B	-	-	H	H	A	A	A	H	H	-	-	B	-	H	H	H	B	-	H	B	H	H	B	-	H	H	A	H	A
12923	A05	18296156	B	H	H	H	B	A	H	H	H	H	A	A	H	B	A	H	-	B	A	A	H	H	-	A	A	H	H	B	A	B	-	H	H	H	-	B	H	B	H	H	-	A	H	H	A	H	A
12924	A05	18296938	H	H	H	H	H	A	H	H	H	-	A	-	H	-	A	H	H	H	A	A	H	-	A	A	A	H	H	H	A	H	H	H	H	H	H	H	H	H	H	H	H	A	H	H	A	H	A
12932	A05	18319041	B	H	H	A	H	H	A	B	H	A	A	H	B	A	H	H	H	A	H	A	-	B	A	H	H	A	H	A	B	A	B	H	H	B	B	H	B	H	H	A	H	H	H	H	H	A	A
12949	A05	18518959	B	H	H	H	B	-	H	H	H	H	A	A	H	B	A	H	B	B	A	A	H	H	A	A	A	H	H	B	A	B	B	H	H	H	B	B	H	B	H	H	B	A	H	H	A	H	A
12950	A05	18528211	B	H	H	H	B	A	H	H	H	H	A	A	H	B	A	H	B	B	A	A	H	H	A	A	A	H	H	B	A	B	B	H	H	H	B	B	H	B	H	H	B	A	H	H	A	H	A
12969	A05	18715185	B	H	H	H	B	A	H	H	H	H	A	A	H	B	A	H	B	B	A	A	H	H	A	A	A	H	H	B	A	B	-	H	H	H	B	B	H	B	H	H	B	A	-	H	A	H	A
12982	A05	18783063	B	H	H	H	B	A	H	H	H	H	A	-	H	-	-	H	B	B	A	A	H	H	A	A	A	H	H	B	A	B	-	H	H	H	B	B	H	B	H	H	B	A	H	H	A	-	A
12988	A05	18790473	B	H	H	H	B	A	H	H	H	H	A	A	H	B	A	H	B	B	A	A	H	H	A	A	A	H	H	B	A	B	B	H	H	H	B	B	H	B	H	H	B	A	H	H	-	H	A
12991	A05	18798544	-	H	H	H	B	A	H	H	H	-	A	A	H	B	A	H	B	B	-	A	H	H	A	A	A	H	H	B	A	B	B	H	H	H	B	B	H	B	H	H	B	A	H	-	A	H	A
13011	A05	1895751	-	H	A	B	B	H	A	H	B	H	H	A	H	H	H	B	H	B	-	H	B	A	H	A	H	A	H	B	B	B	H	H	H	H	-	H	H	H	B	H	B	A	B	H	A	H	H
13015	A05	1896639	H	H	H	B	-	H	A	H	-	H	H	A	H	H	H	B	H	-	A	H	B	A	H	-	H	A	H	B	B	B	H	H	H	H	B	H	H	H	B	H	B	A	B	H	A	H	H
13020	A05	19023903	B	H	-	H	B	A	-	H	H	H	A	A	H	B	A	H	B	-	A	A	H	H	A	A	A	H	H	B	A	B	B	H	H	H	-	B	H	B	H	H	-	A	H	H	A	H	-
13058	A05	19210121	B	H	H	H	-	-	H	H	H	H	A	A	H	-	A	H	-	B	A	A	H	H	A	A	-	H	H	B	A	B	B	H	H	H	B	B	-	B	H	H	B	-	H	H	A	H	A
13064	A05	19290533	B	H	H	H	B	A	H	H	H	H	A	A	H	B	A	H	B	B	A	-	H	H	A	A	A	H	H	-	A	B	B	H	H	H	B	B	H	B	H	H	B	A	H	H	A	H	A
13083	A05	19380593	-	H	H	H	B	A	H	H	H	H	A	-	H	B	A	H	B	B	A	A	H	H	-	A	A	H	H	B	-	B	B	H	H	H	B	B	H	B	H	H	B	-	H	H	-	H	A
13084	A05	19382653	-	H	H	H	B	A	H	H	H	H	A	A	H	B	A	-	B	B	A	A	H	H	-	A	-	H	H	B	A	B	B	H	H	H	B	B	H	B	H	H	-	A	H	H	A	H	A
13085	A05	19382656	B	-	H	H	B	A	H	H	H	H	A	A	H	-	-	H	B	-	-	A	H	H	A	A	-	-	H	B	-	B	B	H	H	H	B	B	H	-	H	H	B	A	H	H	-	H	-
13086	A05	19385386	-	H	H	H	B	A	H	H	H	H	A	A	H	B	A	H	B	-	A	-	H	H	A	A	-	H	H	B	A	B	B	H	H	H	B	-	H	B	H	H	B	A	H	H	A	H	A
13102	A05	19499953	B	H	H	H	B	A	H	H	H	H	A	A	H	-	A	H	B	B	A	A	H	H	A	A	A	H	H	B	A	B	B	H	H	H	B	B	H	B	H	H	B	A	H	H	A	H	A
13113	A05	19546640	B	H	H	H	B	A	H	H	H	H	A	A	H	B	A	H	B	B	-	A	H	-	A	A	A	H	H	-	A	-	B	H	H	H	B	B	H	B	H	H	B	A	H	H	A	H	A
13119	A05	19576002	B	H	H	H	B	A	-	H	H	H	A	A	H	-	-	H	B	-	A	A	H	B	A	-	-	H	H	B	A	-	-	H	H	H	B	-	H	B	H	H	-	A	H	H	A	H	A
13128	A05	19604548	B	H	H	H	B	A	H	H	H	H	A	A	H	-	A	H	B	B	A	A	H	B	A	A	A	H	H	B	A	B	B	H	H	H	B	B	H	-	H	H	B	A	H	H	A	H	A
13138	A05	19682652	B	H	H	H	B	A	H	H	-	H	-	A	H	B	H	H	B	-	A	A	H	B	A	A	A	H	H	-	A	B	-	H	H	-	B	B	H	B	H	H	-	-	H	H	A	H	A
13149	A05	19785397	B	H	H	H	B	A	H	H	H	H	A	A	H	-	H	H	B	B	A	A	H	B	A	A	A	H	H	B	A	B	B	H	H	H	-	-	H	B	H	H	B	A	H	H	A	H	A
13174	A05	1995779	-	-	A	B	B	H	-	H	B	H	H	A	H	H	H	B	H	B	-	H	B	A	-	A	H	A	H	-	B	-	H	H	H	H	B	H	H	H	-	H	B	A	B	H	A	H	H
13181	A05	1998891	H	H	-	B	B	H	A	H	B	H	H	A	H	H	H	B	H	B	-	H	B	A	H	A	H	A	H	B	B	B	H	H	H	H	B	H	H	H	B	H	B	A	B	H	A	H	H
13208	A05	20173142	B	H	H	H	-	A	H	H	H	H	A	A	H	B	H	H	B	B	A	-	H	-	A	A	A	H	H	B	-	B	B	H	H	H	B	B	H	-	H	H	B	A	H	H	-	H	A
13214	A05	20223823	B	H	H	H	B	A	H	H	H	H	A	A	H	B	H	H	B	B	A	A	H	B	A	A	A	H	H	B	H	B	B	H	H	H	B	B	H	B	H	H	B	A	H	H	A	H	A
13223	A05	20278882	B	H	H	H	-	A	H	H	H	A	A	A	H	B	H	H	B	-	A	A	H	B	A	A	-	H	H	B	H	-	B	H	H	H	B	B	H	B	H	H	B	A	H	H	A	H	A
13227	A05	20305717	B	H	H	H	B	A	H	H	H	A	A	A	H	B	H	H	B	B	A	A	H	B	A	A	A	H	H	-	H	B	B	H	H	H	B	B	H	-	H	H	B	A	H	H	A	H	A
13233	A05	20364731	B	H	H	H	B	A	H	H	H	A	A	A	H	-	H	H	B	B	A	A	H	B	A	A	A	H	H	-	H	B	B	H	H	H	B	B	H	-	H	H	B	A	H	H	A	H	A
13238	A05	20375406	B	H	H	H	B	A	H	H	H	A	A	A	H	B	H	H	B	B	A	A	H	-	A	A	A	H	H	B	H	B	B	H	H	H	B	B	H	B	H	H	B	A	H	H	A	H	A
13249	A05	20469698	B	H	H	H	B	A	H	H	H	A	A	A	H	B	H	H	B	B	A	A	H	B	A	A	A	H	H	B	H	B	B	H	H	H	B	B	H	B	H	H	H	A	H	H	A	H	A
13262	A05	20578986	-	H	H	H	B	A	H	H	H	A	A	A	H	B	H	H	B	B	-	-	H	B	A	A	A	H	H	B	H	B	B	H	H	H	B	B	H	B	H	H	H	A	H	H	A	H	A
13278	A05	20653875	B	H	H	H	B	A	H	H	H	A	-	A	H	B	H	H	B	-	A	A	H	B	A	A	A	H	H	B	H	B	B	H	-	H	B	B	H	B	H	H	H	A	H	H	A	H	A
13280	A05	20694369	B	H	H	H	B	A	H	H	H	A	A	A	H	B	H	H	-	B	A	A	H	B	A	A	A	H	-	B	H	B	B	H	H	H	B	B	H	B	H	-	H	-	H	H	A	H	A
13282	A05	20714491	B	H	H	H	B	A	H	H	H	A	A	A	H	B	H	H	B	B	A	A	H	B	A	A	A	H	H	B	H	B	B	H	H	H	B	B	H	B	H	H	H	A	H	H	A	H	A
13297	A05	20821589	B	H	H	H	-	-	H	H	-	A	A	A	H	B	H	H	B	B	A	A	H	B	A	-	A	H	H	B	H	B	B	H	-	H	B	B	H	B	-	H	H	A	H	H	A	H	-
13309	A05	20889557	B	H	H	H	B	A	H	H	H	A	A	-	H	B	H	H	B	B	A	A	H	-	-	A	A	H	H	B	H	B	B	H	H	H	B	-	H	B	H	H	H	A	H	H	A	H	A
13346	A05	21066640	B	H	H	H	B	A	H	H	H	H	A	A	H	B	B	H	B	B	A	A	H	-	A	A	A	H	H	B	H	B	B	H	H	H	H	B	H	B	H	H	H	A	B	H	A	H	A
13372	A05	21131109	B	H	H	H	-	A	H	H	H	H	A	A	H	B	B	H	B	B	A	A	H	B	A	A	A	H	H	B	H	B	B	H	H	H	-	B	H	B	H	H	H	A	B	H	A	H	A
13398	A05	2130261	H	H	A	B	B	H	A	H	B	H	H	A	H	H	H	B	H	-	-	H	B	A	H	A	H	A	H	B	B	-	H	H	H	H	B	H	H	H	B	H	B	A	B	H	A	H	H
13404	A05	21317219	B	H	H	H	B	-	H	H	H	H	A	A	H	B	B	H	B	-	A	A	H	B	A	-	A	H	H	B	H	B	B	H	H	H	H	B	H	H	H	H	H	-	B	H	A	H	A
13405	A05	21317222	-	H	H	H	B	-	H	H	H	H	A	A	H	B	B	H	B	B	A	A	H	B	-	A	-	H	H	B	H	B	B	H	H	H	H	B	H	H	H	H	H	A	B	H	A	H	A
13409	A05	21321995	B	H	H	H	B	A	H	H	H	H	A	A	H	-	B	H	B	-	A	-	H	B	-	A	A	H	H	B	H	B	B	H	H	H	H	B	H	H	H	H	-	H	B	H	A	H	-
13446	A05	21617481	B	H	H	H	B	A	H	H	H	-	A	A	H	B	B	H	B	B	A	A	H	B	A	A	H	B	H	B	H	B	B	H	H	H	H	B	H	H	H	H	H	-	-	H	A	H	A
13451	A05	21664973	B	H	H	H	-	A	H	H	H	H	A	-	H	-	B	H	-	B	-	A	H	-	-	A	A	B	H	-	H	-	B	H	H	H	H	-	H	H	H	H	H	-	B	H	A	H	-
13456	A05	21739249	B	H	H	H	B	A	H	H	H	H	A	A	H	B	B	H	B	B	A	A	H	B	A	A	-	B	H	B	H	B	B	H	H	H	H	B	H	H	H	H	H	A	B	H	A	H	A
13459	A05	21767250	H	H	H	H	H	A	H	H	H	H	A	A	H	H	H	H	H	H	A	A	H	H	H	H	A	H	H	H	H	H	H	H	H	H	H	H	H	H	H	H	H	-	H	H	A	H	A
13483	A05	21918642	-	H	H	H	B	A	H	H	H	H	A	A	H	B	B	H	-	-	A	A	H	B	A	A	A	B	H	B	H	B	B	H	H	H	H	B	H	H	H	H	H	A	B	H	A	H	A
13491	A05	21938098	B	H	H	H	B	A	H	H	H	H	A	A	H	B	B	H	B	B	A	-	H	B	A	H	-	B	H	B	H	B	B	H	H	H	H	B	H	-	H	H	H	A	B	H	A	H	A
13496	A05	21973305	B	-	H	H	B	A	H	H	H	H	A	A	H	B	B	H	-	-	A	A	-	-	A	H	A	B	H	-	H	B	B	H	A	H	-	B	H	H	H	H	H	A	B	H	A	H	-
13497	A05	21973359	B	H	H	H	B	A	H	H	H	H	A	A	H	B	-	H	B	B	A	A	H	B	A	H	A	B	H	B	H	B	-	H	A	H	H	B	H	H	H	H	H	A	B	-	A	H	A
13505	A05	22038526	B	H	H	H	B	A	H	H	H	H	A	A	H	-	-	H	B	B	A	A	H	B	A	H	A	-	H	B	H	B	B	H	A	H	H	B	H	H	H	H	H	A	B	H	A	H	A
13506	A05	22038529	B	H	H	H	B	A	H	H	H	H	A	-	H	B	B	H	B	B	A	A	H	B	-	H	-	B	H	B	H	B	B	H	A	H	H	B	H	H	H	H	H	A	B	H	A	H	-
13508	A05	22039175	B	H	H	H	B	A	H	H	H	H	A	A	H	B	B	H	B	-	A	A	H	B	A	H	A	B	H	B	H	B	B	H	A	H	H	B	H	H	H	H	H	A	B	H	A	H	A
13522	A05	22160583	B	-	H	H	B	A	H	H	H	-	A	A	H	B	B	H	B	B	A	A	H	B	A	H	A	B	H	B	H	H	B	H	A	H	H	B	H	H	H	H	H	A	B	H	A	H	A
13540	A05	22308820	H	H	H	H	H	H	H	H	H	H	H	H	H	H	H	H	H	H	H	H	H	H	H	H	H	H	H	H	H	H	H	H	H	H	H	H	H	H	H	H	H	H	H	H	H	H	H
13541	A05	22316177	B	H	H	H	B	A	H	H	H	B	A	A	H	B	B	H	B	B	A	A	H	B	A	H	A	B	H	B	H	H	B	H	A	H	H	B	H	H	H	A	H	A	B	H	A	H	A
13546	A05	22359898	B	H	H	H	B	A	H	H	H	B	A	A	H	B	B	H	B	B	A	A	H	B	A	H	A	-	H	B	H	H	B	H	A	H	H	B	H	H	H	A	H	A	B	H	A	H	A
13558	A05	2243795	A	H	B	H	H	H	B	A	H	B	-	H	-	A	A	H	H	A	A	H	H	-	A	B	-	H	H	H	H	H	A	B	H	A	H	H	A	A	H	A	B	B	H	H	H	B	B
13578	A05	22535190	B	H	H	H	B	A	H	H	H	B	A	A	H	B	B	H	B	B	A	A	H	B	A	H	A	B	-	B	H	H	B	H	A	-	H	B	H	H	H	A	H	A	B	H	-	H	A
13587	A05	22597228	B	H	H	H	B	A	H	H	H	B	A	-	H	B	B	H	B	-	-	-	H	B	-	H	-	B	B	B	H	H	B	H	A	H	H	B	H	H	H	A	H	A	B	H	A	H	A
13596	A05	22666857	B	H	H	H	B	A	H	H	H	B	A	A	H	B	B	H	B	B	A	A	H	B	A	H	A	B	B	-	H	H	B	H	A	H	H	B	H	H	H	A	H	A	B	H	A	H	A
13606	A05	22691898	B	H	H	H	B	A	H	H	H	B	A	A	H	B	B	H	B	-	A	A	B	-	A	H	A	B	-	-	H	H	B	H	A	-	H	B	H	H	H	A	H	A	-	H	A	H	A
13609	A05	22718825	B	H	H	-	B	A	H	H	H	-	A	A	H	B	B	H	B	-	A	-	B	B	A	H	A	-	B	B	H	H	B	H	A	H	H	B	H	H	H	A	H	A	-	H	A	H	A
13624	A05	22799260	B	H	H	H	H	A	H	-	H	B	H	A	-	B	H	-	H	B	A	A	B	H	A	H	A	B	B	B	-	H	B	H	A	-	H	B	H	H	H	A	H	A	B	H	A	H	A
13639	A05	22845822	B	H	H	H	H	A	H	H	H	B	H	A	H	B	B	H	H	B	A	A	B	B	A	H	A	B	B	B	H	H	B	H	A	H	H	B	H	H	H	A	H	-	B	H	A	H	-
13653	A05	22894133	B	H	H	H	H	-	H	-	H	B	H	-	H	B	B	H	H	B	A	A	B	B	A	H	A	B	B	B	H	H	B	H	A	H	H	B	H	H	B	A	H	A	B	H	A	H	A
13655	A05	22901352	B	H	H	H	H	A	H	H	H	B	H	A	H	B	B	H	H	B	A	A	B	B	A	H	A	B	B	B	H	H	B	H	A	H	H	B	H	H	B	A	H	A	B	H	A	H	A
13656	A05	22902337	B	H	H	H	H	A	H	H	H	B	H	A	H	B	B	H	H	B	A	A	B	B	A	H	A	B	B	B	H	H	B	H	A	H	H	B	H	H	B	A	H	A	B	H	A	H	A
13657	A05	22903443	-	H	H	H	H	-	H	H	H	B	H	A	H	B	B	H	H	B	A	-	B	B	A	H	A	B	B	-	H	H	B	H	-	H	H	-	H	H	B	A	H	-	B	H	A	H	A
13665	A05	22920929	B	H	H	H	H	A	H	H	H	B	H	A	H	B	B	H	H	B	A	A	B	B	A	H	A	B	B	B	H	H	B	H	A	H	H	B	H	H	B	-	H	A	B	H	A	H	-
13666	A05	22926606	B	H	H	H	H	A	H	H	H	B	H	A	H	B	B	H	H	B	A	A	B	B	A	H	A	B	B	B	H	H	B	H	A	H	H	B	H	H	B	A	H	A	B	H	A	H	A
13672	A05	23000356	B	H	-	H	H	-	H	H	H	-	-	-	H	-	B	H	H	-	A	-	-	-	A	H	-	B	B	B	H	H	-	H	-	H	H	B	H	H	B	A	H	-	B	H	-	H	-
13683	A05	23044353	-	H	H	H	H	A	H	H	H	B	-	A	H	H	B	H	H	H	A	A	B	B	A	H	A	B	B	-	H	H	-	H	A	H	H	-	H	H	B	A	H	A	-	H	-	H	A
13688	A05	23083280	B	H	H	H	H	A	H	H	H	B	H	A	H	H	B	H	H	H	A	A	B	B	A	H	A	B	B	B	H	H	B	H	A	H	H	H	H	H	B	A	H	A	B	H	A	H	A
13695	A05	23128068	B	H	H	H	H	A	H	H	H	B	H	-	H	H	B	H	H	H	A	A	B	B	A	H	A	B	B	B	H	H	B	H	A	H	H	H	H	H	B	A	H	A	B	H	A	A	A
13697	A05	23139447	B	H	H	H	H	A	H	H	H	-	H	A	H	H	B	H	H	H	A	-	B	B	A	H	A	B	B	-	H	H	B	H	A	H	H	H	H	H	B	A	H	A	B	H	A	-	A
13698	A05	23139450	B	H	H	H	H	A	H	H	H	B	H	-	H	H	B	H	H	H	A	-	B	-	A	H	A	B	B	B	H	H	-	H	A	H	H	H	H	H	B	A	H	A	B	H	A	-	A
13700	A05	23153454	B	H	H	H	H	-	-	H	H	B	-	A	H	H	B	H	H	H	-	-	B	-	A	H	-	B	B	-	H	H	H	H	A	H	H	H	H	H	B	-	H	-	B	H	A	-	A
13701	A05	23155830	B	H	H	H	H	A	H	H	H	B	H	A	H	H	B	H	H	H	A	A	B	B	A	H	A	B	B	-	H	H	H	H	A	H	H	H	H	H	B	A	H	A	B	H	A	A	A
13729	A05	23314789	B	H	H	H	H	-	H	H	H	-	H	A	H	H	B	H	H	H	A	A	B	B	A	H	A	B	B	B	H	H	H	H	A	H	H	H	H	H	B	A	H	A	B	H	-	A	A
13734	A05	23330946	B	H	B	H	H	-	H	H	H	B	H	A	H	H	B	H	H	H	A	-	B	B	-	H	-	B	B	B	H	H	H	H	-	H	H	H	H	H	B	A	H	A	B	H	A	A	A
13745	A05	23408402	B	H	B	H	H	A	H	H	H	B	H	A	H	H	B	H	H	H	A	A	B	B	A	H	A	B	B	B	H	H	H	H	A	H	H	H	H	H	B	A	H	A	B	H	A	A	A
13758	A05	23447150	B	H	B	H	H	-	H	H	H	-	H	A	H	H	B	H	H	H	A	-	B	-	-	H	A	-	B	-	H	H	-	H	A	H	H	H	H	H	B	-	H	A	-	H	A	A	A
13764	A05	2346064	H	B	A	B	-	H	A	H	B	H	H	A	H	H	H	B	H	B	A	H	B	-	H	A	H	A	H	B	B	B	H	H	H	H	B	H	H	H	B	H	B	A	B	H	A	H	H
13767	A05	23467144	-	H	B	H	H	-	H	H	H	B	H	A	H	H	-	H	H	H	A	A	B	-	A	H	A	-	B	-	H	H	H	H	A	H	-	H	H	H	B	A	H	-	B	H	A	-	-
13769	A05	23486565	B	H	B	H	H	A	H	H	H	B	H	A	H	H	B	H	H	H	-	A	B	B	A	H	A	B	B	B	-	H	H	H	A	H	H	H	H	H	B	A	H	A	B	H	A	A	A
13770	A05	23487510	-	H	B	H	H	A	H	H	H	B	H	A	H	H	B	H	H	H	A	A	B	B	A	H	A	B	B	B	H	H	H	H	A	H	H	H	H	H	B	A	H	A	B	H	A	A	A
13775	A05	23510196	B	H	B	H	H	A	H	H	H	B	H	-	H	-	B	H	H	H	A	-	B	-	A	H	-	B	-	-	H	H	H	H	A	-	H	H	H	H	B	A	H	-	B	H	A	-	-
13780	A05	2353793	H	H	A	B	B	H	A	H	B	H	H	A	H	B	H	B	H	B	A	A	B	A	H	A	H	A	H	B	B	B	H	H	H	H	B	-	H	H	B	H	B	A	B	H	A	H	H
13821	A05	23705776	B	H	B	H	H	A	H	H	H	-	H	A	H	H	B	H	H	H	A	A	B	B	A	H	A	B	B	B	H	H	H	H	A	H	H	H	H	H	B	A	H	A	B	H	A	A	A
13826	A05	23744543	B	H	B	H	H	A	H	H	H	B	H	A	H	H	B	H	H	H	A	A	B	B	A	H	A	B	B	B	H	H	H	H	A	H	H	H	H	H	B	A	H	A	B	H	A	A	A
13831	A05	23777454	B	H	B	H	H	A	H	H	H	B	H	A	B	H	-	H	H	H	A	-	B	B	A	H	A	B	B	B	H	H	H	H	A	H	H	H	H	H	B	A	H	A	B	H	A	A	A
13833	A05	23813512	B	H	B	H	H	A	H	H	H	B	H	A	B	H	B	H	H	H	-	A	B	B	A	H	-	-	B	B	H	H	H	H	A	H	H	H	H	H	-	A	H	-	B	H	A	A	-
13876	A05	24028424	B	H	H	H	H	A	-	H	H	B	H	A	B	H	B	H	H	H	A	A	B	B	A	H	A	B	B	H	H	-	H	H	A	H	H	A	H	H	B	A	H	A	-	H	A	A	A
13893	A05	24172846	B	H	B	H	H	A	H	A	H	B	H	A	B	H	B	H	H	H	A	A	B	B	-	H	A	B	H	H	H	H	H	H	A	H	H	H	H	H	B	A	H	A	B	H	A	A	A
13901	A05	24264831	-	H	H	A	A	H	-	B	H	-	A	H	B	H	H	H	H	A	H	H	A	B	A	H	H	A	H	A	B	-	B	H	H	B	B	H	-	H	H	-	B	B	H	B	H	A	H
13933	A05	24435835	B	H	B	H	H	A	H	A	H	B	H	-	B	H	B	B	H	H	A	H	B	B	A	H	-	B	H	-	H	H	-	H	A	H	H	H	H	H	B	-	H	A	B	H	A	A	-
13949	A05	24619657	B	-	B	H	H	A	H	A	H	B	H	A	B	H	B	B	H	H	A	H	B	B	A	H	-	B	H	H	H	H	-	H	A	H	H	H	H	H	B	A	H	A	B	H	A	-	A
13964	A05	24738122	B	H	-	H	H	A	H	-	H	B	H	-	B	H	B	B	-	H	A	H	B	H	A	H	A	B	H	H	H	H	H	H	A	H	H	H	H	H	B	A	H	A	B	H	A	A	A
13967	A05	24769467	B	H	-	H	-	A	H	A	H	B	H	A	B	H	B	B	H	H	A	H	B	H	A	H	A	B	H	H	H	H	H	H	A	H	H	H	H	H	B	A	H	H	B	H	A	A	-
13970	A05	24782601	B	H	B	H	H	A	H	A	H	B	H	A	B	H	B	B	H	H	A	H	B	H	A	H	A	B	H	H	H	H	H	H	A	H	H	H	H	H	B	A	H	H	B	H	A	A	A
13976	A05	24835186	B	H	B	H	H	A	H	A	H	B	H	A	B	H	B	B	H	H	A	H	B	H	A	H	A	B	H	H	H	H	H	H	A	H	H	H	H	H	B	A	H	H	B	H	A	A	A
13978	A05	24843868	-	H	-	H	H	A	H	A	H	-	H	-	-	H	B	B	H	H	-	H	-	H	A	H	A	B	H	H	H	H	-	H	A	H	H	H	H	H	B	A	H	H	B	H	-	-	A
13982	A05	2488700	H	-	A	B	B	H	A	H	B	H	H	A	H	B	H	B	-	B	A	A	B	A	H	A	H	H	H	B	B	B	H	H	H	H	B	H	H	H	B	H	B	A	B	H	-	H	H
13986	A05	24898219	B	H	B	H	H	A	H	A	H	B	H	A	B	H	B	-	H	H	A	H	B	H	A	H	A	B	H	H	H	H	H	H	A	H	H	H	H	H	B	A	H	H	B	H	A	A	A
13989	A05	24900769	B	H	B	H	H	A	H	A	H	B	H	A	B	H	B	B	H	H	A	H	B	H	A	H	A	B	H	H	H	H	H	H	A	H	H	H	H	H	B	A	H	H	B	H	A	A	A
13994	A05	24929162	-	H	B	H	H	A	H	-	H	B	H	A	B	H	B	-	H	H	A	H	B	H	A	H	A	B	H	H	H	H	H	H	A	H	H	H	H	H	B	A	H	H	B	H	A	-	-
13995	A05	24929165	B	H	B	H	H	A	H	A	H	B	H	A	B	H	B	B	H	H	A	H	B	H	A	H	A	B	H	H	H	H	H	H	A	H	H	H	H	H	B	A	H	H	B	H	A	A	A
14036	A05	25067422	B	H	B	H	H	A	H	A	H	B	H	A	B	H	B	B	H	H	A	H	B	H	H	H	A	B	H	H	H	H	H	H	A	H	H	H	H	H	-	A	H	-	B	H	A	A	A
14062	A05	25164512	B	H	B	H	H	A	H	A	H	B	H	A	B	H	B	B	H	H	A	H	B	H	H	H	A	B	H	H	H	H	H	H	A	H	H	H	H	H	B	A	H	H	B	H	A	A	A
14064	A05	25215067	-	H	B	H	H	-	H	-	H	-	H	-	B	H	B	-	H	H	H	H	B	H	-	H	A	B	H	H	H	H	H	H	A	H	H	H	H	H	B	-	H	H	-	H	A	-	-
14065	A05	25216925	B	H	B	H	H	A	H	A	H	B	H	A	B	H	B	B	H	H	H	H	B	H	H	H	A	B	H	H	H	H	H	H	A	H	H	H	H	H	B	A	H	H	B	H	A	A	A
14126	A05	2922954	B	B	A	B	B	H	A	H	B	H	H	A	H	B	H	B	H	-	A	A	B	A	H	A	H	H	H	B	H	B	H	H	H	-	B	H	H	H	B	H	B	A	B	H	-	H	H
14142	A05	3109712	B	H	A	B	B	H	A	H	B	H	H	A	H	B	H	B	-	B	A	A	-	A	H	A	H	H	H	B	H	B	H	H	H	H	B	H	H	H	B	H	B	A	B	H	A	H	H
14145	A05	3171032	-	B	-	B	B	H	A	H	B	H	H	A	H	B	-	B	H	B	A	A	H	A	H	A	H	H	H	B	H	-	H	H	H	H	B	H	H	H	B	H	B	A	B	H	A	H	H
14146	A05	3172809	B	B	A	B	B	H	A	H	B	H	H	A	H	B	H	B	H	B	A	A	H	A	H	A	H	H	H	B	H	B	H	H	H	H	B	H	H	H	B	H	B	A	B	H	A	H	H
14147	A05	3172812	B	B	A	B	B	H	A	H	B	H	H	A	H	B	H	-	-	B	A	A	H	A	H	-	H	H	H	B	H	B	H	H	H	H	B	H	H	H	B	H	B	A	B	H	A	H	H
14150	A05	3182830	B	B	A	B	B	H	A	H	B	H	H	A	H	B	H	B	H	B	A	A	H	A	H	A	H	H	H	-	H	B	H	H	H	H	B	H	H	H	B	H	B	A	B	H	A	H	H
14151	A05	3182833	B	B	A	B	B	H	A	H	B	H	H	A	-	B	H	B	H	B	A	A	H	A	H	A	H	H	H	B	H	B	H	H	H	H	B	H	H	H	B	H	B	A	B	H	A	H	H
14153	A05	3214962	B	B	A	B	B	H	A	H	B	H	H	A	H	B	H	B	H	-	A	A	H	-	H	A	H	H	H	B	-	B	H	H	H	H	B	H	H	H	B	H	B	A	B	H	A	H	H
14180	A05	3439892	B	B	A	B	B	H	H	H	B	H	H	A	H	B	H	B	H	B	A	-	H	-	H	A	H	H	H	B	H	-	H	H	H	H	B	H	H	B	B	H	-	A	B	H	A	H	H
14189	A05	3507411	B	B	-	B	B	H	H	H	B	H	H	A	H	-	H	-	B	B	-	A	H	A	H	-	H	H	H	B	H	B	H	H	H	H	B	H	H	B	B	H	B	A	B	H	-	H	H
14190	A05	3548051	B	-	A	B	B	H	-	H	B	H	H	A	H	-	H	B	B	B	A	-	H	A	H	A	H	-	H	B	H	B	H	H	H	H	B	H	H	B	B	H	B	A	B	H	-	H	H
14215	A05	385279	A	H	A	B	H	B	H	H	H	H	H	-	-	H	H	-	-	H	H	H	B	-	-	A	H	H	H	B	B	H	H	H	A	A	B	B	H	H	B	H	H	H	-	H	-	H	B
14234	A05	4087187	B	B	A	H	B	H	-	H	B	H	H	A	H	B	H	B	B	B	A	A	H	A	H	-	H	H	H	B	H	B	H	H	H	H	B	H	H	B	H	H	B	A	B	H	A	H	A
14235	A05	4087645	B	B	A	H	B	H	H	H	B	H	H	A	H	B	H	B	B	B	A	A	H	A	H	A	H	H	H	B	H	B	H	H	H	H	B	H	H	B	H	H	B	A	B	H	A	H	A
14237	A05	4104624	B	B	A	H	B	H	H	H	B	H	H	A	H	B	H	B	B	B	A	A	H	A	H	A	H	H	H	B	H	B	H	H	H	H	B	H	H	B	H	H	B	A	B	H	A	H	A
14256	A05	4424932	B	-	A	H	B	H	H	H	B	-	H	A	H	B	H	B	B	B	A	A	H	A	H	-	-	H	H	-	H	B	H	H	H	H	-	H	H	B	-	H	B	A	B	H	-	-	A
14266	A05	4517263	B	B	A	H	B	H	H	H	B	H	H	-	H	B	H	B	B	B	A	A	H	A	H	A	H	H	H	B	H	B	H	H	H	H	B	H	H	B	H	H	B	A	B	H	A	H	A
14273	A05	4561560	B	B	H	H	B	H	H	H	B	H	-	A	H	B	-	B	B	B	A	A	H	A	H	A	H	H	H	B	H	B	H	H	H	H	B	H	H	B	H	H	B	A	B	H	A	H	A
14282	A05	4608635	B	B	H	H	B	H	H	H	-	H	H	-	H	-	H	H	B	B	A	-	H	A	H	A	H	H	H	B	H	-	H	A	H	H	B	H	H	B	H	H	B	A	-	H	A	H	A
14288	A05	4693522	B	B	H	H	B	H	H	H	B	H	H	A	H	B	H	H	B	B	A	A	H	A	H	A	H	H	H	B	H	B	H	A	H	H	B	H	H	B	H	H	B	A	B	H	A	H	A
14352	A05	5105871	B	B	H	H	B	H	H	H	B	H	H	A	H	-	H	H	B	B	A	A	H	A	A	A	A	H	H	B	H	B	B	A	H	H	B	H	H	B	H	H	B	A	B	H	A	H	A
14358	A05	5157015	B	H	H	H	B	H	H	H	B	H	H	A	H	B	H	H	B	-	A	A	H	A	A	A	-	H	H	B	H	B	-	A	H	H	B	H	H	B	H	H	B	A	B	H	A	H	A
14359	A05	5161237	B	H	H	H	B	H	H	H	B	H	H	A	H	B	H	H	B	B	A	A	H	A	A	A	-	H	H	B	H	B	B	A	H	H	B	H	H	B	H	H	B	-	B	H	A	H	A
14375	A05	5277971	B	H	H	H	B	H	H	H	B	H	H	A	H	B	H	H	B	B	A	A	H	A	A	A	A	H	H	B	H	B	B	A	H	H	B	H	H	B	H	H	B	A	B	H	A	H	A
14392	A05	5412795	-	H	H	-	B	A	B	B	A	H	B	H	-	-	H	H	H	B	H	-	H	-	-	H	A	A	-	A	H	H	B	-	-	A	B	-	A	H	A	-	H	H	A	H	B	B	B
14405	A05	5516971	B	H	H	H	B	H	H	H	-	H	H	A	H	B	H	H	B	B	A	A	H	H	A	A	-	H	H	B	H	B	B	A	H	H	B	H	H	B	H	H	B	A	B	H	A	H	A
14524	A05	6560137	H	A	H	H	H	H	-	H	H	H	A	H	H	H	H	-	H	A	H	A	H	H	H	H	H	H	-	H	H	A	H	H	H	H	-	-	H	H	H	H	A	H	A	A	H	H	A
14525	A05	6560140	H	A	H	H	H	H	H	H	H	H	A	H	H	H	H	A	H	A	H	A	H	H	H	H	H	H	A	H	H	A	H	H	H	H	H	H	H	H	H	H	A	H	A	A	H	H	A
14532	A05	6599719	B	H	H	H	B	H	H	H	B	H	A	A	H	B	H	H	B	B	A	A	H	H	A	A	A	H	H	B	H	B	B	A	H	H	B	H	H	B	H	H	B	A	B	H	A	H	A
14539	A05	6646220	B	-	H	H	B	H	H	H	B	H	A	A	H	B	H	H	B	B	-	A	H	H	A	A	A	H	H	-	H	B	B	A	H	H	B	H	H	B	H	H	-	A	B	H	A	H	A
14541	A05	6676074	B	H	H	H	B	H	H	H	B	H	-	A	H	B	H	H	B	B	-	A	H	H	A	A	A	H	H	-	-	B	B	A	H	H	-	H	H	B	H	H	B	-	B	H	A	-	-
14551	A05	6713568	B	H	H	H	B	H	-	H	B	H	A	A	-	B	H	H	B	B	A	A	H	H	A	A	A	H	H	B	H	B	B	A	H	H	B	H	H	B	H	H	-	A	B	H	A	H	A
14553	A05	6717428	B	H	H	H	B	H	H	H	B	H	A	A	H	B	H	H	B	B	A	A	H	H	A	A	A	H	H	B	H	B	B	A	H	H	B	H	H	B	H	H	B	A	B	H	A	H	A
14558	A05	6741808	B	H	H	H	B	H	H	H	B	H	A	A	H	B	H	H	B	-	A	A	H	H	A	A	A	H	H	B	H	B	-	A	H	H	B	H	H	B	H	H	B	A	B	H	A	H	A
14562	A05	6769228	B	H	H	H	B	H	H	H	B	H	A	A	H	B	H	H	B	-	A	A	H	H	A	A	A	H	H	B	H	B	-	A	H	H	B	H	H	B	H	H	B	A	B	H	A	H	A
14596	A05	6970501	B	H	H	H	B	H	H	H	B	H	A	A	H	B	H	H	B	B	A	A	H	H	A	A	A	H	H	-	H	B	B	-	H	H	B	H	H	B	H	H	B	A	H	H	-	H	A
14600	A05	6979381	B	H	H	H	B	H	H	H	B	H	A	A	H	B	H	H	B	B	A	A	H	H	A	A	A	H	H	B	-	B	B	A	H	H	B	H	H	B	H	H	B	A	H	H	A	H	A
14607	A05	7084526	B	H	H	H	H	H	H	H	B	H	A	A	-	-	H	H	B	-	A	-	H	H	-	A	A	H	H	B	H	B	-	A	H	H	-	H	H	B	H	H	B	A	H	H	A	H	A
14629	A05	7267288	B	H	H	H	H	H	H	H	B	H	A	A	H	B	H	H	B	B	A	A	H	H	A	A	A	H	H	B	H	B	-	A	H	H	B	H	H	B	H	H	B	A	H	H	A	H	A
14640	A05	7355704	B	H	H	H	H	H	H	H	B	H	A	A	H	B	H	H	B	B	A	A	H	H	A	A	A	H	H	B	H	B	B	A	H	H	B	H	H	B	H	H	B	A	H	H	A	H	A
14645	A05	7384815	B	H	H	H	H	H	H	-	B	H	A	A	H	B	H	H	B	B	A	A	H	H	A	A	A	H	H	B	H	B	B	A	H	H	B	H	H	B	H	H	B	A	H	H	A	H	A
14646	A05	7385149	B	H	H	H	H	H	H	H	B	H	-	A	H	-	H	H	B	B	A	-	H	H	A	A	-	H	H	B	H	B	B	A	H	H	-	H	H	B	H	H	-	A	H	H	A	H	A
14664	A05	7592394	-	H	H	H	H	H	H	H	-	H	A	A	H	B	H	H	B	-	-	-	-	H	A	-	A	H	H	-	H	B	-	A	H	H	-	-	H	B	H	H	B	A	H	H	A	H	-
14693	A05	7824662	B	H	H	H	H	H	B	-	B	H	A	A	H	B	H	H	B	B	A	A	H	B	A	-	A	H	H	B	H	B	B	A	H	H	B	H	H	B	H	H	B	A	H	H	A	H	A
14733	A05	822710	H	H	-	-	-	H	H	H	B	H	H	A	B	H	H	B	A	H	H	H	B	A	H	A	H	A	H	B	B	H	H	H	H	A	B	B	H	H	B	H	H	H	B	H	A	H	-
14736	A05	8267164	B	H	H	-	B	A	H	B	A	H	H	A	A	B	H	H	B	-	H	H	H	H	-	B	A	A	H	B	A	-	H	A	H	B	B	A	-	B	A	H	B	-	A	H	-	A	B
14737	A05	8267729	B	H	H	B	B	A	H	B	A	H	H	A	A	B	H	H	B	B	H	H	H	H	B	B	A	A	H	B	A	H	H	A	H	B	-	A	H	B	A	A	B	H	A	H	B	A	B
14777	A05	8534767	H	-	H	H	H	H	H	H	-	H	H	H	H	H	H	H	H	H	H	H	-	H	H	H	H	H	H	H	H	H	H	H	H	H	H	H	H	H	H	H	H	H	H	H	H	H	H
14788	A05	8683602	B	H	H	H	H	H	H	H	B	H	A	A	H	B	H	H	B	B	A	A	H	H	A	A	A	H	H	B	H	B	B	A	H	H	B	H	H	B	H	H	B	A	H	H	A	H	A
14813	A05	889618	H	H	A	-	B	H	H	H	B	H	H	A	B	H	H	B	A	H	H	H	B	A	H	A	H	A	H	B	B	H	H	H	H	A	B	B	H	-	B	H	H	H	B	H	A	H	B
14828	A05	9022155	B	H	H	H	H	A	H	H	B	H	A	A	H	B	H	H	B	B	A	A	H	H	A	A	A	H	H	B	H	B	B	A	H	H	B	H	H	B	H	H	B	A	H	H	A	H	A
14842	A05	9135882	B	H	H	H	H	A	H	H	B	H	A	A	H	B	H	H	B	B	A	A	H	H	A	A	A	H	H	B	H	B	B	A	H	H	B	H	H	B	H	H	B	A	H	H	A	H	A
14869	A05	9408260	-	H	H	H	H	-	-	H	-	H	A	A	H	-	H	-	-	B	A	A	H	-	A	A	-	H	H	-	H	B	B	A	H	H	B	H	H	B	H	H	B	A	H	H	A	H	A
14888	A05	962855	H	H	A	B	B	H	A	H	B	H	H	A	B	H	H	B	A	H	H	H	B	A	H	A	H	A	H	B	B	H	H	H	H	A	B	B	H	H	B	H	H	H	B	H	A	H	B
14893	A05	9669441	-	H	H	H	H	H	H	-	H	H	H	H	H	H	H	H	H	H	H	H	-	H	H	H	H	H	H	H	H	H	H	H	H	H	H	H	H	-	H	H	H	H	H	H	H	H	H
14899	A05	9696261	A	B	B	H	H	H	H	A	H	H	H	H	H	-	-	H	B	-	A	H	H	H	A	H	A	H	H	H	H	B	A	H	B	-	B	H	A	A	H	-	B	H	H	H	B	H	H
14947	A06	10027028	A	H	B	H	H	H	B	-	H	B	B	H	-	-	A	H	H	A	-	H	H	H	A	B	A	H	H	H	H	H	A	B	-	A	H	H	H	A	H	A	-	B	H	H	B	B	B
14960	A06	1014429	H	A	A	H	H	H	H	H	A	A	B	H	H	H	H	H	A	H	A	A	A	H	H	H	B	H	A	H	A	A	H	A	B	A	A	H	H	H	H	H	B	B	H	H	B	B	H
14978	A06	10289750	A	H	B	H	H	H	B	A	H	B	B	H	B	A	A	H	H	A	A	H	H	H	A	B	A	H	H	H	H	H	A	B	H	A	H	H	-	A	H	-	B	B	H	H	B	B	B
15007	A06	10486029	-	H	B	H	H	H	-	A	H	B	B	H	B	A	A	H	H	A	A	H	H	H	-	B	A	H	H	H	H	-	-	B	H	A	H	H	H	A	H	-	B	-	H	-	H	B	B
15010	A06	10509765	A	H	B	H	H	H	B	A	H	B	-	-	-	A	-	H	H	A	-	H	H	H	A	B	A	H	H	H	H	H	A	B	H	A	H	H	H	A	H	A	B	-	H	H	H	-	B
15011	A06	10509768	A	H	B	H	H	H	B	A	H	B	B	H	B	A	A	H	H	A	A	H	H	H	A	B	A	H	H	H	H	H	A	-	H	A	H	H	H	A	H	-	B	B	H	H	H	B	B
15015	A06	10571897	A	H	B	H	H	H	B	-	H	B	B	H	-	A	A	H	H	A	A	H	H	H	A	-	A	-	H	-	H	H	-	B	H	A	H	H	H	A	H	A	B	-	H	H	H	B	-
15017	A06	10572520	A	H	B	H	H	H	B	-	H	B	B	H	-	A	A	H	H	A	A	H	H	H	A	-	A	H	H	H	H	H	A	-	H	A	H	H	H	A	H	A	B	B	H	H	H	B	-
15027	A06	1065307	H	A	A	H	H	H	H	H	A	A	B	H	H	H	H	H	A	H	A	A	A	H	H	H	B	H	A	H	A	A	H	A	B	A	A	H	H	H	H	H	B	B	H	H	B	B	H
15044	A06	10705989	A	H	B	H	H	H	B	A	H	B	B	H	B	A	A	H	H	A	A	H	H	H	A	B	A	H	H	H	H	H	A	B	H	A	H	H	A	A	H	A	B	B	H	H	H	B	B
15050	A06	10736742	A	H	B	H	H	H	B	A	H	B	B	H	-	A	A	H	H	-	-	H	H	H	A	B	-	H	H	H	H	H	A	-	H	A	H	H	A	A	H	A	B	B	H	H	H	B	-
15058	A06	10808703	A	H	-	H	H	H	B	-	H	B	B	H	B	A	A	H	H	A	A	H	H	H	A	-	A	H	H	H	H	H	A	B	H	A	H	H	-	A	H	A	-	B	H	H	H	B	-
15062	A06	10830704	A	H	B	H	H	H	B	A	H	B	B	H	B	A	A	-	H	A	A	H	H	H	A	B	A	H	H	H	H	H	A	B	H	A	H	H	A	A	H	A	B	B	H	H	H	B	B
15068	A06	10854311	A	H	B	H	H	H	B	A	H	B	B	H	B	A	A	H	H	A	A	H	-	H	H	B	A	H	H	H	H	H	A	B	H	H	H	H	A	A	H	A	B	B	H	H	H	B	B
15072	A06	10872314	A	H	B	H	H	H	B	A	H	B	B	H	B	A	A	H	H	A	A	H	H	H	A	B	A	H	H	H	H	H	A	B	H	A	H	H	A	A	H	A	B	B	H	H	H	B	B
15077	A06	10878087	A	H	B	H	-	H	B	A	-	B	-	H	B	A	A	H	H	A	A	H	H	H	A	B	A	H	H	H	H	H	A	B	H	A	H	H	-	A	H	A	B	B	H	H	H	-	B
15093	A06	11021643	A	H	B	H	H	H	B	A	H	B	B	H	B	A	A	H	H	A	A	H	H	H	A	B	A	H	H	H	H	H	A	B	H	A	H	H	A	A	H	A	B	B	H	H	H	B	B
15110	A06	11114991	A	H	B	H	H	H	B	A	H	B	B	H	B	A	A	H	H	A	A	H	H	H	A	B	A	H	H	H	H	H	A	B	H	A	H	H	A	A	H	A	B	B	H	H	H	B	B
15112	A06	11130939	A	H	-	H	H	H	B	A	H	B	B	H	B	A	A	H	H	A	A	H	H	H	A	B	A	H	H	H	H	H	A	B	H	-	-	H	A	A	H	A	-	B	-	H	H	-	B
15142	A06	11301789	A	H	B	H	H	H	B	A	H	B	H	H	H	A	-	H	H	A	A	H	H	H	A	H	-	H	H	H	H	H	A	-	H	A	H	H	-	A	H	-	B	-	H	H	H	H	B
15145	A06	11302331	H	H	H	H	H	H	H	H	H	H	H	H	H	-	H	-	H	H	H	H	H	H	H	H	H	H	H	H	H	H	H	H	H	H	H	H	H	H	H	H	H	H	H	H	H	H	H
15160	A06	11331405	A	H	-	H	H	H	B	A	H	B	B	H	B	A	A	H	H	A	A	H	H	H	A	B	A	H	H	H	H	H	A	B	H	A	-	H	-	A	H	A	B	B	H	H	H	B	B
15170	A06	1138455	H	A	A	H	H	H	H	H	A	A	B	H	H	H	H	H	A	H	-	A	-	H	H	H	B	H	A	H	A	A	H	A	B	A	A	H	H	H	H	H	B	B	H	H	B	B	H
15203	A06	11603421	A	H	B	H	H	H	B	A	H	B	B	H	B	A	A	H	H	A	-	H	H	H	A	B	A	H	H	H	H	H	A	B	H	A	H	H	A	A	H	-	B	B	H	H	H	B	B
15245	A06	11805572	A	H	B	H	H	H	B	A	H	B	B	H	B	A	A	H	-	A	A	H	H	H	A	B	A	H	H	H	H	H	-	B	H	-	H	H	A	A	H	A	B	B	H	H	H	B	B
15330	A06	12222008	-	H	-	H	H	H	-	A	-	B	B	-	-	-	-	H	H	-	A	H	H	H	A	B	A	H	H	H	H	H	-	B	H	A	H	H	A	A	H	A	B	B	H	H	-	B	-
15356	A06	12430758	H	A	A	-	B	H	B	H	H	H	A	H	H	H	H	-	A	A	H	A	H	H	-	H	A	A	-	H	-	H	B	H	H	H	H	H	B	H	H	H	B	H	-	A	A	B	B
15404	A06	12854560	A	H	-	H	H	H	B	A	H	B	B	H	B	-	A	H	H	A	-	H	H	H	A	B	A	H	H	H	H	H	A	B	H	A	H	H	A	A	H	A	B	B	H	H	H	H	B
15415	A06	12940067	A	H	B	-	H	H	B	A	H	B	B	H	B	A	A	H	H	A	A	H	H	-	A	B	-	H	H	H	H	H	A	B	H	A	H	H	A	A	H	A	B	B	H	H	H	B	B
15420	A06	12975296	A	H	B	H	H	H	B	-	H	B	B	H	B	A	A	H	H	A	A	H	H	H	A	B	A	H	H	H	-	H	A	B	H	A	H	H	A	A	H	A	B	B	H	H	B	B	B
15441	A06	13107845	A	-	B	H	H	H	B	A	H	B	B	H	B	-	A	H	H	A	A	H	H	H	A	B	A	H	H	H	H	H	A	B	H	A	H	H	A	A	H	A	B	B	H	H	H	B	B
15448	A06	13136946	A	H	-	H	H	H	B	A	H	B	B	H	B	-	A	H	H	A	-	H	H	H	A	B	A	H	H	H	H	H	A	B	H	A	H	H	A	A	H	-	B	-	H	H	-	B	B
15449	A06	13142098	A	H	B	H	H	H	B	A	H	B	B	H	B	A	A	H	H	A	A	H	H	H	A	B	A	H	H	H	H	H	A	-	H	A	H	H	A	A	H	A	B	B	H	H	H	B	B
15450	A06	13142301	A	H	B	H	H	H	B	A	H	B	-	H	B	A	A	H	H	A	A	H	H	H	A	B	A	H	H	H	H	H	A	B	H	A	H	H	A	A	H	A	B	B	H	H	H	B	B
15477	A06	13378679	A	H	B	H	H	H	-	A	H	B	B	B	B	A	A	H	H	A	A	H	H	H	A	B	A	H	H	H	H	H	A	B	H	A	H	H	A	A	H	A	B	B	H	H	H	B	B
15534	A06	13864837	A	H	B	H	H	H	B	A	H	B	B	B	B	A	A	H	H	A	A	H	H	H	A	B	A	H	H	H	H	H	A	B	H	A	H	H	A	A	H	A	B	B	H	H	H	B	B
15536	A06	13892543	A	H	B	H	H	H	B	-	H	B	B	B	B	A	A	H	H	A	A	H	H	H	A	B	A	H	H	H	H	H	A	B	H	A	H	H	A	-	H	A	-	B	H	H	H	B	B
15578	A06	14189673	A	H	B	H	H	H	B	A	H	-	B	B	B	A	-	H	H	A	A	H	H	H	A	B	A	H	H	H	H	H	-	B	H	A	H	H	A	A	H	-	B	-	H	H	H	B	B
15586	A06	14268165	A	H	B	H	H	H	B	A	H	B	B	B	B	A	A	H	H	-	A	H	H	H	-	-	A	H	H	H	H	H	A	B	H	A	H	H	A	-	H	-	B	B	H	H	H	B	B
15604	A06	1439615	H	H	A	H	H	H	H	H	A	A	B	H	H	H	H	H	A	H	A	A	A	H	H	H	B	H	A	H	A	-	H	A	B	A	A	H	H	H	H	H	B	B	H	H	B	B	H
15605	A06	1439618	H	H	A	H	H	H	H	H	A	A	B	H	H	H	H	H	A	H	A	A	A	H	H	H	-	-	A	H	A	A	H	A	B	A	A	H	H	H	H	H	B	B	H	H	B	B	H
15612	A06	14430518	A	H	B	H	H	H	B	A	H	B	B	B	B	A	A	H	H	A	A	H	H	H	A	B	A	H	H	H	H	H	-	B	H	A	H	H	A	A	H	A	B	B	H	H	H	B	B
15628	A06	14598780	A	-	-	H	H	H	B	-	H	B	B	B	B	A	A	-	H	A	-	H	H	H	A	-	A	H	-	H	H	H	A	B	H	A	H	H	A	-	H	A	B	-	-	-	A	B	B
15629	A06	146003	H	A	A	H	H	H	H	H	A	A	B	H	H	H	B	H	A	H	A	A	A	H	H	H	B	H	A	H	A	H	H	A	B	A	A	H	H	H	H	H	B	B	H	H	B	B	H
15652	A06	14805559	A	H	B	H	H	H	-	A	H	B	B	B	B	A	A	H	H	A	A	H	H	H	A	B	A	H	H	H	H	H	A	B	H	A	H	H	A	A	H	A	B	B	H	H	A	B	B
15662	A06	14872675	A	H	B	H	H	H	B	A	H	B	B	-	B	A	A	H	H	A	A	H	H	H	A	B	A	H	H	H	H	H	A	B	H	A	H	H	A	A	H	A	B	B	H	H	A	B	B
15670	A06	14920786	A	H	-	H	-	-	-	-	H	-	H	H	-	A	H	H	H	-	A	A	A	-	H	A	H	H	H	H	H	-	H	H	H	A	H	-	A	A	-	H	H	H	A	H	A	-	H
15696	A06	15064211	A	H	-	H	H	H	B	A	H	B	B	-	B	A	A	H	H	A	A	H	H	H	A	B	A	H	H	H	H	H	A	B	H	A	H	H	A	A	H	A	B	B	H	H	-	-	B
15697	A06	15064406	A	H	B	H	H	H	B	A	H	B	B	B	-	A	A	H	H	A	A	H	H	H	A	B	A	H	H	H	H	H	A	B	H	A	H	H	A	A	H	A	B	B	H	H	A	B	B
15699	A06	15102027	A	H	-	H	H	H	H	A	H	B	B	B	B	A	A	-	H	A	A	H	H	H	A	B	A	H	H	H	H	H	A	B	H	A	H	H	A	A	H	A	B	B	H	H	A	B	B
15706	A06	15166373	-	H	B	H	H	H	-	-	H	B	B	B	B	A	A	H	H	A	A	H	H	H	A	B	A	H	H	H	H	H	A	B	H	A	H	H	A	A	H	A	B	B	H	H	A	B	B
15707	A06	15174819	A	H	B	H	H	H	B	A	H	B	B	B	B	A	A	H	H	A	A	H	H	H	A	B	A	H	H	H	H	H	A	B	H	A	H	H	A	A	H	A	B	B	H	H	A	B	B
15711	A06	15181783	A	H	B	H	H	H	B	A	-	B	B	B	B	A	A	H	H	A	A	H	H	H	A	B	A	H	H	H	H	H	-	B	H	A	H	H	A	A	H	-	B	B	H	H	A	-	-
15712	A06	15190170	A	H	B	H	H	H	B	A	H	B	B	B	B	A	A	H	H	A	A	H	H	H	A	B	A	H	H	H	H	H	A	-	H	A	H	H	A	A	H	A	B	B	H	H	A	B	B
15713	A06	15190485	A	H	B	H	H	H	B	A	H	B	B	B	-	A	A	H	H	A	A	H	H	H	A	B	A	H	H	H	H	H	A	B	H	A	H	-	A	A	H	A	B	B	H	-	A	B	B
15716	A06	15192455	-	H	B	H	H	H	B	A	H	B	B	B	B	A	A	H	H	A	A	H	H	H	-	B	A	H	H	H	H	H	A	B	H	A	H	H	A	A	H	A	-	B	H	H	A	B	B
15722	A06	15219296	A	H	B	H	H	H	B	A	H	B	-	B	B	A	A	H	H	A	-	H	H	H	A	-	-	H	-	H	H	H	-	B	H	A	H	H	A	A	-	A	-	-	H	H	A	B	B
15723	A06	15224510	A	H	B	H	H	H	B	A	H	B	B	B	B	A	A	H	H	A	A	H	H	H	-	B	A	H	H	H	H	H	A	B	H	-	H	H	A	A	H	-	B	-	H	H	A	B	B
15725	A06	15272856	A	H	B	H	H	H	-	A	H	B	B	B	-	A	A	H	H	-	A	H	H	H	A	B	A	H	H	H	H	H	A	-	H	A	H	H	-	-	H	A	-	B	H	H	A	-	B
15755	A06	15481342	A	H	B	H	H	H	-	A	H	B	B	B	-	A	A	H	H	A	A	H	H	H	A	B	-	H	H	H	H	H	-	B	H	H	-	-	A	A	H	A	-	B	-	H	A	-	B
15761	A06	15549348	A	H	B	H	H	H	B	A	H	B	B	B	B	A	-	H	H	-	A	H	-	H	A	B	A	H	H	H	H	H	A	B	H	-	H	H	A	A	H	A	B	B	H	H	A	B	B
15793	A06	15874679	A	H	B	H	H	H	B	A	H	B	B	B	B	A	A	H	H	A	A	H	H	H	A	B	A	H	-	H	H	H	-	B	H	A	H	H	A	A	H	-	B	-	H	H	A	B	B
15800	A06	15901209	A	H	B	H	H	H	B	A	H	B	B	B	B	A	A	H	H	A	A	H	H	H	A	B	A	H	H	H	H	H	A	B	H	A	H	H	A	A	H	A	B	B	H	H	A	B	B
15807	A06	15965078	A	H	B	H	H	H	B	A	H	B	B	B	B	A	A	H	H	A	A	H	H	H	A	B	A	H	H	H	H	H	A	B	H	-	H	H	A	A	H	A	B	B	H	H	A	B	B
15808	A06	15980897	A	H	B	H	H	H	B	A	H	B	-	B	B	A	A	H	H	A	A	H	H	H	A	B	A	H	H	H	H	H	A	B	-	A	H	H	A	A	H	A	B	B	H	H	A	B	B
15809	A06	15980900	A	H	B	H	H	H	B	A	H	B	B	B	B	A	A	H	H	A	A	H	H	H	A	B	A	H	H	H	H	H	A	B	H	A	H	H	A	A	H	A	B	B	H	H	A	B	B
15833	A06	16134442	A	-	-	H	H	H	B	A	H	B	H	-	-	A	H	H	H	A	A	H	H	H	A	-	-	H	H	H	H	H	-	B	H	A	H	H	A	A	H	A	B	B	H	H	A	B	H
15835	A06	16193976	A	H	-	H	H	H	B	A	H	B	H	B	B	A	H	H	H	A	A	H	H	H	-	B	A	H	H	H	H	H	-	B	H	A	H	H	A	A	H	A	B	-	H	H	A	B	H
15838	A06	16230635	-	H	B	H	H	H	B	A	H	-	H	-	-	A	H	H	H	A	A	H	H	H	-	B	-	H	H	H	H	H	A	B	-	A	H	H	-	A	H	A	-	B	H	H	-	B	H
15855	A06	16389552	A	H	B	H	H	H	B	A	H	B	H	B	B	A	H	H	H	A	A	H	H	H	A	B	A	H	H	H	H	H	A	-	H	-	H	H	A	-	H	-	H	B	H	H	A	B	H
15858	A06	16410335	A	H	B	H	H	-	B	A	H	B	H	B	B	A	H	H	H	A	A	H	H	H	A	B	A	H	H	H	H	H	A	B	H	-	H	H	A	A	H	A	H	B	H	H	A	B	H
15868	A06	16495596	A	H	B	H	H	H	B	A	H	B	H	B	B	A	H	H	H	A	-	H	H	H	A	-	A	H	H	H	H	H	A	-	H	A	H	H	A	A	H	A	H	B	H	H	A	B	H
15869	A06	1649811	H	H	A	H	H	H	H	H	A	-	B	H	H	H	H	H	A	H	A	A	A	H	H	H	B	H	A	H	H	A	H	A	B	A	A	H	H	-	H	H	B	B	H	H	B	B	H
15871	A06	1650345	H	H	A	-	H	H	H	H	A	A	B	H	H	H	H	H	A	H	A	-	A	H	H	H	-	H	A	H	H	A	H	A	B	A	A	H	H	H	H	H	B	B	H	H	-	B	H
15884	A06	16610526	-	H	H	H	H	H	H	H	H	H	H	H	H	A	H	H	H	A	A	H	H	H	A	H	-	H	H	H	H	H	A	H	H	A	H	H	-	A	H	-	H	H	H	H	A	H	H
15886	A06	1663106	H	H	A	H	H	H	H	H	A	A	B	H	H	H	H	H	A	H	A	A	A	H	H	H	B	H	A	H	H	A	H	A	B	A	A	H	H	-	H	H	B	B	H	H	B	B	H
15891	A06	16718234	A	H	B	H	H	H	-	H	H	B	H	-	B	A	H	H	H	A	A	H	H	H	A	B	A	H	H	H	H	H	A	B	H	A	H	H	A	A	H	A	H	B	H	H	-	-	H
15895	A06	16764636	A	H	B	H	H	H	B	H	H	B	H	B	B	A	H	H	H	A	A	H	H	H	-	B	A	H	H	H	H	H	A	B	H	-	H	H	A	A	H	A	H	B	H	H	A	B	H
15941	A06	17132406	A	H	B	H	H	H	-	H	H	-	-	B	B	A	H	H	H	A	A	H	H	H	A	B	A	H	H	H	-	H	A	B	H	-	H	H	A	A	H	A	-	B	H	H	A	B	H
15942	A06	17133208	A	H	B	H	H	H	B	H	H	B	H	B	-	A	H	H	H	A	A	H	H	H	A	B	A	H	H	-	H	H	A	B	H	-	H	H	A	A	H	A	H	B	H	H	A	B	H
15958	A06	17235787	A	H	B	H	H	H	B	H	H	B	H	B	-	A	H	H	H	A	A	H	H	H	A	-	A	H	H	H	H	H	A	-	H	A	H	H	A	A	H	A	H	-	H	H	A	B	H
15960	A06	17248119	A	H	-	-	H	H	B	-	H	B	H	B	B	A	H	H	H	A	A	H	H	H	A	B	-	H	H	H	H	H	-	B	H	A	-	H	A	A	H	-	H	B	H	H	A	B	H
15980	A06	17463274	A	-	B	H	H	H	B	H	H	B	H	B	B	A	H	H	H	A	A	H	H	H	A	B	A	H	H	H	H	H	A	B	H	H	H	H	A	A	H	A	H	B	H	H	A	B	H
16007	A06	17621860	A	H	B	H	H	H	B	H	H	B	H	B	B	A	H	H	H	A	A	H	H	H	A	B	A	H	H	H	H	H	A	B	H	A	A	H	A	A	H	A	H	B	H	H	A	B	H
16015	A06	17652978	-	H	-	H	H	H	-	H	H	-	H	B	B	-	H	H	H	A	A	H	H	H	A	B	-	H	H	H	H	H	A	B	H	A	H	H	A	A	H	A	H	B	H	H	A	-	H
16017	A06	17655408	A	H	B	H	H	H	B	H	H	B	H	B	B	A	H	H	H	A	-	H	H	H	A	B	-	H	H	H	H	H	A	-	H	A	H	H	A	A	H	A	H	B	H	H	A	B	H
16025	A06	1778661	H	-	A	H	H	H	H	H	A	A	B	H	H	H	H	H	-	H	A	A	A	H	H	H	B	H	A	H	H	A	H	A	B	A	A	H	H	H	H	H	-	B	H	H	B	B	H
16026	A06	1778664	H	H	A	H	H	H	H	H	A	A	B	H	H	H	H	H	A	H	A	A	A	H	H	H	B	H	A	H	H	A	H	-	B	A	A	H	H	H	H	H	B	B	H	H	B	B	H
16027	A06	17801069	H	H	H	H	H	H	H	H	H	H	H	H	H	H	H	H	H	H	H	H	H	H	H	H	A	H	H	H	H	H	H	H	H	H	H	H	H	H	H	H	H	H	H	H	H	H	H
16029	A06	17812614	A	H	B	H	H	H	B	H	H	B	H	B	-	A	H	H	H	A	A	H	H	H	A	-	A	H	H	H	H	H	A	B	H	A	H	H	A	A	H	A	H	B	H	H	A	B	H
16034	A06	17876187	A	H	B	H	H	H	-	H	H	B	H	B	B	A	H	H	H	A	A	H	H	H	A	B	A	H	H	H	H	H	-	B	H	A	H	H	-	-	-	A	H	B	H	H	A	B	H
16040	A06	17891345	A	H	B	H	H	H	B	H	H	B	H	B	B	A	H	H	H	A	A	H	H	H	A	B	A	H	H	H	H	H	A	B	H	A	H	H	A	A	H	A	H	B	H	H	A	B	H
16051	A06	17950412	A	H	-	H	H	H	B	H	H	-	H	B	B	A	H	-	H	A	A	H	H	H	A	B	A	H	H	H	H	H	-	B	H	A	H	-	A	-	H	A	H	-	H	H	A	B	H
16059	A06	18051451	A	H	B	H	H	H	B	H	H	B	H	-	B	A	H	H	B	A	A	H	H	H	A	B	A	H	H	H	H	H	A	-	H	A	H	H	A	A	H	-	H	B	H	H	A	B	H
16064	A06	18165502	A	H	B	H	H	H	B	H	H	B	H	B	B	A	H	H	-	A	A	H	H	H	A	B	A	H	H	H	H	H	A	B	H	-	H	H	A	A	H	A	H	B	H	H	A	B	H
16065	A06	18166009	A	H	B	H	H	H	B	H	H	B	H	B	B	A	H	-	-	A	A	H	H	H	A	-	A	H	H	H	H	H	A	B	H	A	H	H	A	A	H	A	H	-	H	H	A	B	H
16078	A06	18278373	A	H	B	H	H	H	B	H	H	B	H	-	-	A	H	H	B	A	A	H	H	H	H	B	A	H	H	H	H	H	A	B	H	A	H	H	A	A	H	A	H	H	H	H	A	B	H
16081	A06	18344061	A	H	B	H	H	H	B	H	H	B	H	B	B	A	H	H	B	A	A	H	H	H	H	B	A	H	H	H	H	H	A	B	H	A	H	H	A	A	H	A	H	H	H	H	A	B	H
16092	A06	184868	H	A	A	H	H	H	H	H	A	A	B	H	H	H	H	H	A	H	A	A	A	H	H	-	B	H	A	H	A	H	H	A	B	A	A	H	H	H	H	H	-	B	H	H	B	B	H
16130	A06	18871679	A	A	-	-	H	H	B	H	H	B	H	B	B	-	H	H	B	-	A	H	H	H	H	-	-	H	H	H	H	H	A	-	H	A	H	H	A	-	H	A	H	H	A	H	-	B	H
16132	A06	18873686	A	A	B	H	H	H	B	H	H	B	H	B	B	A	-	H	B	A	A	H	H	H	H	B	A	H	H	H	H	H	A	B	H	A	H	H	A	A	H	A	H	H	A	H	A	B	H
16144	A06	18900381	A	-	B	H	H	H	B	H	H	B	H	B	B	A	H	H	B	A	A	H	H	H	H	B	A	H	H	H	H	H	A	B	H	A	H	H	A	A	H	A	H	H	A	H	A	B	H
16146	A06	18915339	A	A	B	H	H	H	B	H	H	B	H	B	B	A	H	H	B	A	A	H	H	H	H	-	A	H	H	H	H	H	A	B	H	A	H	H	A	A	H	-	H	H	A	H	A	B	H
16153	A06	18971529	A	A	B	H	H	H	B	H	-	B	H	B	-	A	H	H	B	A	A	H	-	H	H	B	A	H	H	H	H	H	A	B	H	A	H	H	A	A	H	-	H	H	A	H	A	-	H
16169	A06	19076099	A	-	B	H	H	H	B	H	H	-	H	B	B	A	H	H	B	A	-	H	H	H	H	B	A	H	H	H	H	H	A	B	H	A	H	H	H	A	H	A	H	H	A	H	A	B	H
16193	A06	19234289	A	A	B	H	-	H	B	H	H	B	H	-	B	A	H	H	-	A	A	H	H	H	H	B	A	-	H	H	H	H	-	B	H	A	H	H	A	A	H	A	H	H	A	H	A	B	H
16212	A06	19388737	A	A	B	H	H	H	B	H	B	-	H	B	B	A	H	H	B	A	A	-	H	H	-	B	A	H	H	H	H	H	A	B	H	A	H	H	A	A	B	A	H	H	-	H	A	B	H
16266	A06	1961300	H	H	A	H	H	H	H	H	A	A	B	H	H	H	H	H	A	H	A	A	A	H	H	H	B	H	A	H	H	-	H	A	B	A	A	H	H	H	H	H	B	B	H	H	B	B	H
16683	A06	20028002	A	-	B	H	H	H	B	H	B	B	H	B	B	A	H	H	B	A	A	H	H	H	H	B	A	H	H	H	H	H	-	B	H	H	H	H	A	A	B	A	H	H	H	H	-	B	H
16694	A06	20065940	A	A	B	H	H	H	-	H	B	B	H	B	-	-	H	H	-	A	A	H	H	H	H	B	A	H	H	H	H	H	A	B	H	A	H	-	A	A	B	-	H	H	H	H	A	-	H
16700	A06	20098824	A	A	B	-	H	H	B	H	B	B	-	B	B	A	-	H	B	A	A	H	H	H	H	B	-	H	H	H	H	H	A	-	H	A	H	H	-	-	B	A	H	H	H	H	A	B	H
16701	A06	20105735	A	A	-	H	H	H	B	H	B	B	H	B	B	A	H	H	-	A	A	H	H	H	H	-	A	H	H	H	H	H	A	B	H	-	H	H	A	A	-	-	H	H	H	H	-	B	H
16708	A06	20172148	A	A	-	H	H	H	B	H	B	B	H	B	B	A	H	H	B	A	A	H	H	H	H	B	A	H	H	H	H	H	A	B	H	-	H	H	A	A	B	A	-	H	H	H	A	B	H
16721	A06	2022041	H	H	A	H	H	H	H	H	A	A	B	H	H	H	H	H	A	H	A	A	A	H	H	H	B	H	A	H	H	A	H	A	B	A	A	H	H	H	H	H	B	B	H	H	B	B	H
16722	A06	2022044	H	H	A	-	H	H	H	H	A	A	B	H	H	H	H	H	A	H	A	A	A	H	H	H	B	H	A	H	H	-	H	A	B	A	A	H	-	H	H	H	B	B	H	-	B	-	-
16743	A06	20331789	A	A	B	H	H	H	B	H	B	B	H	B	B	A	H	H	B	A	A	H	H	H	H	B	-	H	H	H	H	H	A	B	H	A	H	H	A	-	B	A	H	H	H	H	A	B	H
16752	A06	2035338	H	H	A	H	H	H	-	H	A	A	B	H	H	H	H	H	-	H	-	A	-	H	H	H	-	H	-	H	H	A	H	A	-	A	A	-	H	H	H	H	B	B	H	H	-	B	H
16760	A06	20403533	A	-	B	H	H	H	B	H	B	B	H	B	B	A	H	H	B	-	A	H	H	H	H	B	A	H	H	H	H	H	A	B	H	A	H	H	A	H	B	A	H	H	H	H	A	B	H
16767	A06	20426795	A	A	B	H	H	H	B	H	B	B	H	-	B	A	H	H	B	A	A	H	H	H	H	B	A	H	H	H	H	H	A	B	H	A	H	H	A	A	B	A	H	H	H	H	A	B	H
16768	A06	20426798	A	A	-	H	H	H	B	H	B	B	H	B	B	A	H	H	B	A	-	H	H	H	H	B	A	H	H	H	H	H	A	B	H	A	H	H	-	-	B	A	H	H	H	H	A	B	H
16777	A06	2047909	H	H	A	H	H	H	H	H	A	A	B	H	H	H	H	H	A	H	A	A	A	H	H	H	B	H	A	H	H	-	H	A	B	A	A	H	H	H	H	H	B	B	H	H	B	B	H
16778	A06	20482896	A	A	B	H	H	H	B	H	B	B	H	B	B	A	H	H	H	A	A	H	H	H	H	B	A	H	H	H	H	H	H	B	H	A	H	H	A	A	-	A	H	H	H	H	A	B	H
16787	A06	20620908	A	A	B	H	H	H	B	H	B	B	H	B	-	A	H	H	B	A	A	H	H	H	H	-	A	H	H	H	H	H	H	B	H	A	H	H	A	A	B	A	H	H	H	H	A	B	H
16788	A06	2066672	H	H	-	H	H	H	H	H	A	A	B	H	H	H	H	H	A	H	A	A	A	H	H	H	B	H	A	H	H	A	H	A	B	-	A	-	H	H	H	H	B	B	H	H	B	B	H
16792	A06	2069912	H	H	A	H	H	H	H	H	A	A	B	H	H	H	H	H	A	H	A	A	A	H	H	H	B	H	A	H	H	A	H	-	B	A	A	H	H	H	H	H	B	B	H	H	B	B	H
16797	A06	20715292	A	A	B	H	A	H	B	H	B	B	H	B	B	A	H	H	B	A	A	H	H	H	H	B	A	H	H	H	H	H	H	B	H	A	H	H	A	A	B	-	H	H	H	H	A	B	H
16799	A06	20739951	A	A	B	H	A	H	B	H	B	B	H	B	B	A	H	H	B	A	A	H	H	H	-	B	A	H	H	H	H	H	H	B	H	A	H	H	A	A	B	A	H	H	H	H	A	B	H
16830	A06	20937191	A	A	B	H	A	H	B	H	B	B	H	B	B	A	H	H	B	A	A	H	H	H	-	B	A	H	H	H	H	H	H	B	H	-	H	H	A	A	B	A	H	H	B	H	A	B	H
16856	A06	2115757	H	H	A	H	H	H	H	H	A	A	B	H	H	H	H	H	A	H	A	A	A	H	H	H	B	H	A	H	H	A	H	A	B	A	A	H	H	H	H	H	-	B	H	H	B	-	H
16861	A06	21195019	A	A	B	H	A	H	B	H	B	B	H	B	-	A	H	H	B	H	A	H	H	H	-	-	-	H	H	H	H	H	H	B	H	A	H	H	A	A	B	A	H	H	B	H	A	B	H
16893	A06	21398767	A	A	B	H	A	H	B	H	B	H	H	B	B	A	H	H	B	B	A	H	B	H	H	B	A	H	H	H	H	H	H	B	H	A	H	H	A	A	B	H	H	-	B	H	A	B	-
16894	A06	21398770	A	A	B	H	A	H	B	H	B	H	H	B	B	A	H	H	B	-	A	H	B	-	H	B	A	H	H	H	H	H	H	B	H	A	H	H	A	A	B	H	-	H	B	H	A	B	H
16895	A06	21402676	A	A	B	H	A	H	B	H	B	H	H	B	B	A	H	H	B	B	A	H	B	H	H	B	A	H	H	H	H	H	H	B	H	A	H	H	A	A	B	H	H	H	B	H	A	B	H
16912	A06	21519534	A	A	B	H	A	H	B	H	B	H	H	B	B	-	H	H	B	B	A	H	B	H	-	B	A	H	H	H	H	H	H	B	H	-	H	H	A	A	B	H	-	H	B	H	A	B	H
16918	A06	21554347	A	A	B	H	A	H	-	H	-	H	H	B	B	-	H	H	B	-	-	H	B	H	H	B	A	H	H	H	H	H	H	B	H	A	H	H	A	H	-	H	H	H	B	H	A	-	H
16919	A06	21561310	A	A	B	H	A	H	B	H	B	H	H	-	B	A	H	H	B	B	-	H	B	H	H	B	A	H	H	H	H	H	H	-	H	A	H	H	A	H	B	H	H	H	B	H	A	B	H
16925	A06	21619434	A	A	B	-	A	H	-	H	B	H	H	B	B	A	H	H	B	-	A	-	B	H	H	B	A	H	H	-	H	H	H	B	-	A	H	H	A	H	B	H	H	H	B	H	A	B	H
16930	A06	21649012	A	A	B	H	-	H	B	H	B	H	A	B	B	A	H	H	B	B	A	H	B	H	H	B	A	B	H	H	H	H	H	B	H	A	H	H	A	H	B	H	H	H	B	H	A	B	H
16948	A06	21848296	A	-	B	H	A	H	B	H	B	H	A	B	B	H	H	H	B	B	A	H	B	H	H	B	A	B	H	H	H	H	H	B	H	A	H	H	A	H	B	H	H	H	B	H	A	B	H
16950	A06	21865642	-	A	B	H	A	H	B	H	B	H	A	B	B	H	H	H	B	B	A	H	B	H	H	-	A	B	H	H	H	H	H	B	H	A	H	B	A	H	B	H	H	H	B	H	A	B	H
16959	A06	21890163	A	-	B	H	A	H	B	H	B	H	A	B	B	H	H	H	B	B	-	H	B	H	H	-	A	B	H	H	H	H	H	B	H	A	H	B	A	H	B	H	H	H	B	H	A	B	H
16972	A06	2195667	H	H	A	H	H	H	H	H	A	A	B	H	H	H	H	A	A	H	A	A	A	-	H	H	B	H	A	H	H	A	H	A	-	-	A	H	H	H	H	H	B	B	H	H	B	B	H
16994	A06	2226493	H	H	A	H	H	H	H	H	A	-	B	H	H	H	H	A	A	H	A	A	A	H	H	H	B	H	A	H	H	A	H	A	B	A	A	H	H	H	H	H	B	B	H	H	-	B	H
16999	A06	2227658	H	H	A	H	H	H	H	H	A	A	B	H	H	H	H	A	A	H	-	A	A	H	H	H	B	H	A	H	H	A	H	A	B	A	A	H	H	H	H	H	B	B	H	H	-	B	H
17002	A06	22282247	A	A	B	H	A	H	B	H	B	H	-	-	B	H	-	H	B	B	A	H	B	H	H	-	A	B	H	H	H	H	B	B	H	A	H	-	A	H	B	H	H	H	B	H	A	B	-
17010	A06	22318948	A	A	-	H	-	H	B	H	B	H	A	B	B	H	H	H	B	B	A	H	B	-	H	B	A	B	H	H	H	H	B	B	H	A	H	B	A	H	B	H	H	H	B	H	A	B	H
17012	A06	22319355	A	A	B	H	A	H	B	H	B	H	A	B	B	H	H	H	B	B	A	H	B	H	H	B	A	B	H	H	H	H	B	B	H	A	H	B	A	H	B	H	H	H	B	H	A	B	H
17031	A06	22470935	A	A	B	H	A	H	B	H	B	H	A	B	B	H	H	H	B	B	A	H	B	H	H	B	-	B	H	H	H	H	B	-	H	A	H	B	A	H	B	H	H	H	B	H	A	B	H
17034	A06	22474357	A	A	B	H	A	H	B	H	B	H	A	B	B	H	H	H	B	B	-	H	-	H	H	B	A	B	H	H	H	H	B	B	H	A	H	B	A	H	B	H	H	H	B	H	A	B	-
17037	A06	22491074	A	A	B	H	A	H	B	H	-	-	A	B	B	H	H	-	B	B	A	H	B	H	H	B	A	B	H	H	H	H	B	-	H	A	H	-	-	H	-	H	H	H	B	H	A	B	H
17040	A06	22496300	A	A	B	H	A	H	B	H	B	H	A	B	B	H	H	H	B	B	A	H	B	H	H	B	A	B	H	H	H	H	B	B	H	A	H	B	A	H	B	H	H	H	B	H	A	B	H
17041	A06	22502530	-	-	B	H	-	H	-	H	B	H	A	B	B	H	H	H	B	B	-	H	-	H	H	B	A	B	H	-	H	H	B	-	H	A	H	B	-	H	B	H	H	-	B	H	A	-	H
17056	A06	22705131	A	A	B	H	A	H	B	H	B	H	A	B	B	H	H	H	B	B	A	H	B	H	H	B	A	B	H	H	H	H	B	B	H	A	H	B	A	H	B	B	H	H	B	H	A	B	H
17057	A06	22713705	A	-	B	H	A	H	-	H	B	H	A	B	B	H	H	H	B	B	A	H	B	H	H	B	A	-	H	H	H	H	B	B	H	A	H	B	A	H	B	B	H	H	B	H	A	B	H
17064	A06	22827212	H	A	H	H	A	H	H	H	A	H	H	H	H	H	H	A	A	H	H	A	H	A	H	A	H	H	H	-	H	A	H	H	A	H	H	H	H	H	H	H	H	H	H	H	A	H	H
17068	A06	2283273	H	H	A	H	H	H	H	H	A	A	B	H	B	H	H	A	A	H	A	-	A	H	H	H	H	H	A	H	H	A	H	A	B	A	A	H	H	H	H	H	B	B	H	H	B	B	B
17091	A06	23094830	A	A	B	H	A	H	B	H	B	H	A	H	B	H	H	A	B	B	A	H	B	H	H	B	A	B	H	H	H	H	-	B	A	A	H	B	A	H	B	B	H	H	B	H	A	B	H
17093	A06	23101879	A	A	-	H	A	H	B	H	B	H	A	H	B	H	H	A	-	B	A	H	B	H	H	B	A	B	H	H	H	H	B	B	A	A	H	B	-	H	B	B	-	H	B	H	A	B	H
17099	A06	23149967	A	-	B	H	A	H	B	H	B	H	A	H	B	H	H	A	B	B	A	H	-	H	H	-	A	B	H	H	H	A	B	B	A	A	H	B	A	H	B	B	H	H	B	H	A	B	H
17107	A06	23170490	A	A	B	H	A	H	B	H	B	H	-	H	B	H	H	A	B	B	A	H	B	H	H	B	A	B	-	H	H	-	B	-	A	A	-	B	A	H	B	B	H	H	B	H	A	B	H
17116	A06	23196670	A	A	B	H	A	H	B	-	B	-	A	H	B	H	H	-	B	B	A	H	B	-	H	B	A	B	H	H	H	A	B	B	A	A	H	B	-	H	B	B	-	H	B	H	A	B	H
17118	A06	23200101	A	A	B	H	A	H	B	H	B	H	A	H	B	H	H	A	B	B	A	H	B	H	H	B	A	B	H	H	H	A	B	-	A	A	H	B	A	H	-	B	H	H	B	H	A	B	H
17122	A06	23223944	A	A	B	H	A	H	B	H	B	H	A	H	B	H	H	A	B	B	A	H	B	H	H	B	A	B	H	H	H	A	B	B	A	H	H	B	A	H	B	B	H	H	B	H	A	B	H
17131	A06	23287733	A	A	B	H	A	H	B	H	B	H	A	H	B	H	H	A	B	B	A	H	B	H	H	B	A	B	H	H	H	A	B	B	H	A	H	B	A	H	B	B	H	H	B	H	A	B	H
17132	A06	23322385	A	A	B	H	A	H	B	H	B	-	A	H	B	H	H	A	B	B	A	H	B	H	H	B	A	B	B	H	H	A	B	B	H	A	H	-	-	H	B	B	H	H	B	H	A	B	H
17136	A06	23338983	-	A	-	H	A	H	-	H	B	H	A	H	B	H	H	-	-	B	-	H	-	H	H	B	A	-	B	H	H	-	B	B	H	A	A	-	A	H	B	B	H	H	B	H	A	B	H
17137	A06	2340730	H	H	A	H	H	H	H	H	A	A	B	H	B	H	H	H	A	H	A	A	A	H	H	H	H	H	A	H	H	A	H	A	B	A	-	H	H	H	H	H	B	B	H	H	B	B	B
17165	A06	23692899	A	A	-	H	A	H	-	H	B	A	A	H	B	H	H	A	B	B	A	H	B	H	H	B	A	B	B	H	B	A	B	B	H	A	A	B	A	H	B	B	H	A	B	H	-	-	H
17169	A06	23747084	A	A	B	H	A	H	B	H	B	A	A	H	B	H	H	A	B	-	A	H	B	H	H	B	A	B	B	H	B	A	B	B	H	A	A	B	A	H	B	B	H	A	B	H	A	B	H
17182	A06	23862490	A	A	B	H	A	H	B	H	B	A	A	H	B	H	H	A	B	B	-	H	B	H	H	B	A	B	B	H	B	-	B	B	H	A	A	B	A	H	B	B	H	A	B	H	A	B	H
17194	A06	23958143	A	A	B	H	A	H	B	H	B	-	A	H	-	H	H	-	B	-	-	H	-	H	H	B	-	B	B	H	-	A	B	-	H	A	A	B	-	H	-	B	H	-	B	H	-	B	H
17196	A06	23958414	A	A	B	H	A	H	B	H	B	A	A	H	-	H	H	A	B	B	A	H	B	H	-	B	A	-	-	H	-	-	B	B	H	-	A	B	A	H	B	B	H	A	B	H	A	B	H
17198	A06	23980165	H	H	H	H	H	H	H	A	H	H	A	H	A	H	A	H	H	H	H	A	H	A	H	H	-	H	A	H	H	A	A	A	A	H	H	A	-	H	H	H	H	H	H	A	A	H	H
17202	A06	23989649	A	A	H	H	A	H	H	H	H	A	A	H	H	H	H	A	H	H	A	H	H	H	H	H	A	H	H	H	H	A	H	H	H	A	A	H	A	H	H	H	H	A	H	H	A	H	H
17221	A06	24156393	A	A	B	H	A	H	B	H	-	A	A	H	-	H	H	-	B	-	A	H	B	H	H	B	A	B	B	H	B	A	B	B	H	A	A	B	A	H	B	B	H	A	-	H	A	B	H
17224	A06	24175284	A	A	B	H	A	H	-	H	B	A	A	H	B	H	H	-	B	B	A	-	B	H	H	B	A	B	B	H	-	A	B	B	H	A	-	B	A	H	B	-	H	A	B	H	A	B	H
17230	A06	24202551	A	A	-	H	A	H	B	H	B	A	A	H	B	H	H	A	B	B	A	H	B	H	H	B	A	B	B	H	B	A	B	-	H	-	A	B	A	H	B	B	H	A	-	H	A	B	H
17232	A06	24209743	A	A	B	H	A	H	B	H	B	A	A	H	B	H	H	H	B	B	A	H	B	H	H	B	A	B	B	H	B	A	B	B	H	A	A	B	A	H	B	-	H	A	B	H	-	B	H
17234	A06	24210538	A	A	B	H	A	H	B	H	-	A	-	H	B	H	H	A	B	B	A	H	B	H	H	B	-	B	B	H	B	A	B	B	H	A	A	B	A	H	B	B	H	A	B	H	A	B	H
17237	A06	2422409	H	H	A	H	H	H	H	H	A	H	B	H	B	H	H	H	A	H	A	A	A	H	H	H	H	H	A	H	H	A	H	A	B	A	A	H	H	H	H	-	B	-	H	H	B	B	-
17247	A06	2425580	H	H	-	H	H	H	H	H	A	H	-	H	-	H	H	H	A	H	-	A	A	H	H	H	H	H	A	H	H	A	H	A	-	A	A	H	H	H	H	H	-	-	H	H	-	B	B
17248	A06	2425583	H	H	A	H	H	H	H	H	A	H	B	H	B	H	H	H	-	H	A	-	A	H	H	H	H	H	-	H	H	A	-	A	B	A	A	H	H	H	H	H	B	B	H	H	B	-	B
17252	A06	24261650	A	A	B	H	A	-	B	H	H	A	A	H	-	H	H	A	B	-	A	H	B	H	H	B	-	B	H	H	B	A	B	B	H	-	A	B	A	H	B	B	H	A	B	H	A	B	H
17258	A06	24289622	A	-	B	H	A	H	B	H	H	A	A	H	B	H	H	A	B	B	A	H	B	H	H	B	A	B	H	H	B	A	B	B	H	A	A	B	A	H	B	B	H	A	B	H	A	B	H
17266	A06	24383190	-	-	-	H	A	H	B	H	H	A	A	H	-	H	H	A	B	-	-	H	B	H	H	B	A	B	H	H	B	A	B	B	H	A	-	B	A	H	B	B	H	A	B	H	A	B	H
17274	A06	24423187	A	A	-	H	A	H	B	H	H	A	A	H	B	H	H	A	B	B	A	H	B	H	H	B	A	B	H	H	B	A	B	B	H	A	A	B	A	H	B	B	H	A	B	H	A	B	H
17290	A06	24460895	A	A	B	H	A	H	B	H	H	A	A	H	B	H	H	A	B	B	A	H	B	H	H	B	A	B	H	H	B	A	B	B	H	A	A	B	A	H	B	B	H	A	B	H	A	B	H
17335	A06	24671939	A	A	B	H	A	H	B	H	H	A	A	H	B	H	H	A	B	B	A	H	B	H	H	B	A	B	H	H	B	A	B	B	H	A	A	B	A	H	B	B	H	A	B	H	A	B	H
17346	A06	24708428	-	A	-	H	A	H	B	H	H	A	A	H	-	H	H	A	B	-	A	H	B	H	H	B	A	-	H	H	B	A	-	B	H	A	A	B	A	H	B	B	H	A	B	H	A	B	H
17358	A06	24783720	-	-	-	H	A	H	B	H	H	A	A	H	-	H	H	A	-	B	-	H	-	H	H	B	A	-	H	H	B	A	B	-	H	A	A	-	A	H	B	B	-	A	B	H	-	-	H
17390	A06	24994819	A	A	B	H	A	H	B	H	H	A	A	H	B	H	H	A	B	B	A	H	B	H	H	-	A	B	H	H	B	A	B	B	H	-	A	B	A	H	B	B	H	A	B	B	A	B	H
17403	A06	25061647	A	A	H	H	A	H	H	H	H	H	A	H	H	H	H	H	-	H	A	H	H	H	-	H	-	H	H	H	H	H	H	-	H	A	H	H	A	H	H	H	H	H	H	H	A	H	-
17438	A06	2612721	H	H	A	H	H	H	H	H	A	H	B	H	B	H	H	H	A	H	A	A	A	H	H	H	H	H	A	H	H	A	H	A	B	A	A	H	H	H	H	H	B	B	H	H	B	B	B
17443	A06	2629209	H	H	-	H	H	H	H	H	A	H	-	H	B	H	H	H	A	H	A	A	A	H	H	H	-	-	A	H	H	A	H	A	B	A	A	H	H	H	H	H	B	B	H	H	B	B	-
17454	A06	2728023	H	H	A	H	H	H	H	H	A	H	B	H	B	H	H	H	A	H	A	A	A	H	H	H	A	H	A	H	H	A	H	A	B	A	A	H	H	H	H	H	B	B	H	H	B	B	B
17457	A06	2759401	H	H	H	H	H	H	H	H	A	H	B	-	B	H	H	H	A	H	A	A	A	H	H	H	A	H	A	H	-	A	H	A	B	A	A	H	H	H	H	H	B	B	H	H	B	B	-
17492	A06	3046701	H	H	-	H	H	H	H	H	H	H	B	B	B	H	H	H	-	H	A	-	A	H	H	H	A	H	A	H	H	A	H	A	B	A	A	H	H	H	H	H	B	B	H	H	B	-	B
17508	A06	3130885	H	H	H	H	H	H	H	H	H	H	B	B	B	H	H	H	A	H	A	A	A	H	H	H	A	H	A	H	H	A	H	A	B	A	A	H	H	H	H	H	B	B	H	H	B	B	B
17534	A06	3341249	H	H	H	H	H	H	H	H	H	H	B	B	B	H	H	H	A	H	A	A	-	H	H	H	A	H	A	A	H	A	H	A	B	A	A	H	H	H	H	H	B	B	H	H	B	B	B
17535	A06	3341252	H	-	H	H	H	-	H	H	H	H	B	B	B	H	H	H	A	H	A	A	A	H	H	H	A	H	A	A	H	A	H	A	B	A	-	H	H	H	H	H	B	B	H	H	B	B	B
17540	A06	3342651	H	H	H	H	H	H	H	H	H	H	B	B	B	H	H	H	A	H	A	A	A	H	H	H	A	H	A	A	H	A	H	A	B	H	A	-	H	H	H	H	B	B	H	H	B	B	B
17545	A06	3367475	H	H	H	H	H	H	H	-	H	H	B	B	B	H	H	H	A	H	A	A	-	H	H	H	A	H	-	A	-	A	H	A	-	A	A	-	H	H	H	H	-	B	H	H	-	-	B
17551	A06	3414698	H	H	H	H	H	H	H	H	H	H	B	B	B	H	H	H	A	H	A	A	A	H	-	H	A	H	A	A	H	A	H	A	B	-	-	H	H	H	H	H	-	B	H	H	B	B	B
17560	A06	3453189	H	H	H	H	H	H	H	H	H	H	B	B	-	H	H	H	A	H	-	-	-	H	H	H	A	H	A	A	H	A	H	A	B	-	H	H	H	H	H	A	B	B	H	H	B	B	B
17563	A06	3462097	-	H	H	H	H	H	H	H	H	H	-	B	B	H	H	H	A	H	A	A	A	H	H	H	A	H	A	A	H	A	H	A	B	A	H	H	H	H	H	A	B	B	H	H	B	B	B
17588	A06	3584665	H	H	H	H	H	H	H	H	H	H	B	B	B	H	H	H	A	H	A	A	A	H	H	-	A	H	A	A	H	A	H	-	B	-	H	H	H	H	H	A	B	B	H	H	B	B	B
17595	A06	3634109	H	H	H	-	H	H	H	H	H	H	B	B	B	H	H	H	H	H	A	A	A	H	H	H	A	H	A	A	H	A	H	H	B	A	H	H	H	H	H	A	B	B	H	H	B	B	B
17596	A06	3642138	H	H	H	H	H	H	H	H	H	H	-	B	B	H	H	H	A	H	A	A	-	H	H	H	A	H	A	-	H	A	H	H	B	-	H	H	H	H	H	A	B	B	H	H	B	-	B
17609	A06	3705232	H	H	H	H	H	H	H	H	H	H	B	B	-	H	H	H	-	H	A	A	A	H	H	H	A	H	A	-	H	-	H	H	B	A	H	H	-	H	H	-	-	B	H	H	B	B	B
17610	A06	3705235	H	H	H	H	H	H	H	H	H	H	B	-	B	H	H	H	A	H	A	A	A	H	H	H	-	H	A	A	H	A	H	H	B	A	H	H	H	-	H	A	-	B	H	H	B	-	B
17648	A06	3983230	H	H	H	H	H	H	H	H	H	H	B	B	-	H	H	H	A	H	A	A	H	H	H	H	A	H	-	-	H	-	H	H	B	A	H	H	H	-	H	-	B	B	H	H	B	B	B
17653	A06	3987196	H	H	-	H	H	H	-	H	H	-	B	B	B	H	H	H	A	H	-	H	H	H	H	H	A	H	A	-	H	-	-	H	B	A	H	H	H	A	H	-	-	B	H	H	B	B	-
17655	A06	3993555	H	H	H	H	H	B	H	H	H	H	B	B	B	H	H	H	A	H	-	H	H	H	H	H	A	H	A	A	H	A	H	H	B	A	H	H	H	A	H	-	B	B	H	H	B	B	B
17667	A06	4067797	H	H	H	H	H	H	H	H	H	H	B	B	B	H	H	H	A	H	A	H	H	H	H	H	A	H	A	A	H	A	H	H	H	A	H	H	H	A	H	A	B	-	H	H	B	B	-
17671	A06	4080361	H	H	H	H	H	H	H	-	H	H	B	B	B	H	-	H	A	H	A	H	H	H	H	H	-	H	A	A	H	A	H	H	H	A	H	H	H	A	H	A	B	B	H	H	B	-	B
17692	A06	4280866	H	H	H	H	-	H	H	H	H	H	B	B	B	-	H	H	-	H	A	H	H	H	H	H	A	H	A	A	-	A	-	H	H	A	H	H	H	-	H	-	-	B	H	H	-	B	B
17701	A06	4323413	H	H	H	H	H	H	H	H	H	H	B	-	B	H	H	H	A	H	A	H	H	H	H	H	A	H	A	A	H	A	H	H	H	A	H	H	H	A	H	A	B	B	H	H	B	B	B
17702	A06	4323728	H	H	H	H	H	H	H	H	H	H	B	B	B	H	H	H	A	H	A	H	H	H	H	H	A	H	A	A	H	A	H	H	H	A	H	H	H	A	H	A	B	B	H	H	B	B	B
17703	A06	4323731	H	H	H	H	H	H	H	H	H	H	B	B	B	H	H	H	A	H	A	H	H	H	H	H	A	H	A	-	H	-	H	H	H	-	-	H	H	A	-	A	B	B	H	H	B	B	B
17718	A06	4398748	H	H	H	H	H	H	H	H	H	H	B	B	B	H	H	H	A	H	A	H	H	H	H	H	A	H	A	A	H	A	H	H	-	A	H	H	H	A	H	A	B	B	H	H	B	B	B
17726	A06	4449002	H	H	H	H	H	H	H	H	H	H	B	B	B	H	H	H	A	H	A	H	H	H	H	H	A	H	A	-	H	A	H	H	H	A	H	H	H	A	H	A	B	B	H	H	B	B	B
17737	A06	4527734	H	H	H	H	H	H	H	H	H	B	B	B	B	H	H	H	A	H	A	H	H	H	H	H	A	H	A	A	H	A	H	H	H	A	H	H	H	A	H	A	B	B	H	H	B	B	B
17748	A06	4564776	H	H	H	-	H	H	H	H	H	B	B	-	-	H	H	-	-	H	A	H	H	H	H	H	A	H	-	-	H	-	H	H	H	-	H	H	H	A	H	-	-	-	H	H	B	B	B
17781	A06	4922985	H	H	H	H	H	H	H	A	H	B	B	B	B	H	H	H	H	H	A	H	H	H	H	H	A	H	A	A	H	A	H	H	H	A	H	H	H	A	H	A	B	B	H	-	B	B	B
17783	A06	4927479	H	H	H	H	H	H	H	A	H	-	B	B	B	H	H	H	H	H	-	H	H	H	H	H	A	H	A	-	H	-	H	H	H	A	H	H	H	A	H	A	B	B	H	H	-	B	B
17794	A06	4969331	H	H	H	H	H	H	H	A	H	B	B	-	B	H	H	H	H	H	A	H	H	H	-	H	A	H	A	A	H	-	H	B	H	-	H	H	H	A	H	-	B	B	H	H	B	B	B
17796	A06	5016324	H	H	H	H	H	H	H	A	H	B	B	B	B	H	H	H	H	H	A	H	H	H	H	H	A	H	A	A	H	A	H	B	H	A	H	H	H	A	H	-	B	B	H	H	B	B	B
17797	A06	5016327	H	H	H	H	H	H	H	A	H	B	B	B	B	H	H	H	H	H	-	H	H	H	H	H	A	H	A	-	H	A	H	B	H	A	-	H	H	A	H	A	B	-	H	H	B	B	B
17798	A06	5016758	H	H	H	H	H	H	H	A	H	B	B	B	B	H	H	H	H	H	-	H	H	H	H	H	A	H	A	A	H	A	H	-	H	A	H	H	H	A	H	A	B	B	H	H	-	-	B
17801	A06	5094943	H	H	H	H	H	H	H	A	H	B	B	B	B	H	H	H	H	H	A	H	-	H	H	-	A	H	A	A	H	A	H	B	H	A	H	H	H	A	H	A	B	-	H	H	B	B	B
17811	A06	5180875	H	H	H	H	H	H	H	A	H	B	B	B	B	H	H	H	H	H	A	H	H	H	H	H	A	H	A	A	H	A	H	B	H	A	H	H	H	A	H	A	B	-	H	H	B	B	B
17855	A06	5439271	H	H	H	H	H	H	H	A	H	B	B	B	B	H	H	H	H	H	A	H	H	H	H	H	A	H	A	A	H	A	H	B	H	A	H	H	H	A	H	A	B	B	H	H	B	B	B
17860	A06	5528081	H	H	H	H	-	H	H	A	H	B	B	B	B	H	H	H	H	H	A	H	H	H	H	H	A	H	A	A	H	-	H	B	H	-	H	H	H	A	H	A	B	B	H	H	B	B	B
17881	A06	5661682	H	H	H	H	H	H	H	A	H	B	B	B	B	-	H	H	H	H	-	H	H	H	H	H	A	H	-	-	H	A	H	B	H	A	H	H	H	A	H	A	B	B	H	H	B	B	B
17882	A06	5662227	H	H	H	H	H	H	H	A	H	B	B	B	B	-	H	H	H	H	-	H	H	H	H	H	A	H	A	A	H	A	H	B	H	-	H	H	H	-	H	-	-	B	H	H	B	-	-
17893	A06	5772518	H	H	H	H	H	H	H	A	H	B	B	B	-	A	H	H	H	H	A	H	H	H	H	H	A	H	A	A	H	A	H	B	H	A	H	H	H	A	H	A	B	B	H	H	B	B	B
17894	A06	5784461	H	H	H	H	H	H	H	A	H	B	B	B	B	A	H	H	H	H	-	-	H	H	H	H	A	H	A	A	H	A	H	B	H	-	H	H	H	A	H	A	B	-	H	H	B	B	B
17897	A06	5785700	H	H	H	H	H	H	H	A	H	B	B	B	B	A	H	H	H	H	A	H	H	H	H	H	A	H	A	A	H	A	H	B	H	A	H	H	H	A	H	A	-	B	H	H	B	B	B
17913	A06	5872712	H	H	H	H	H	H	H	A	H	B	B	B	B	A	H	H	H	H	A	H	H	H	H	B	-	H	-	A	H	A	H	B	H	A	H	H	H	A	H	-	B	B	H	H	B	B	B
17927	A06	5961906	H	H	H	H	H	H	H	-	H	B	B	B	-	A	H	H	H	H	A	H	H	H	A	B	A	H	A	-	H	-	H	B	H	A	H	H	H	A	H	A	B	B	H	H	B	B	B
17928	A06	5961909	H	H	H	H	H	H	H	-	H	B	B	B	B	-	H	H	H	H	A	H	H	H	-	B	A	H	-	A	H	A	H	B	H	A	H	H	H	A	H	-	B	B	H	H	B	B	B
17941	A06	6068452	H	H	H	H	H	H	H	A	H	B	B	B	B	A	H	H	H	H	A	H	H	H	A	B	A	H	A	A	H	A	H	B	H	A	H	H	H	A	H	A	B	B	H	H	B	B	B
17956	A06	6152099	A	H	H	H	H	H	H	A	H	B	B	B	B	A	H	H	H	H	A	H	H	H	-	B	A	-	A	A	-	A	H	B	H	A	H	H	H	-	H	A	B	B	H	H	B	B	B
17986	A06	6274534	A	H	H	H	H	H	H	A	H	B	B	B	B	A	A	H	H	H	A	H	H	H	A	B	A	H	A	A	H	A	H	B	H	A	H	H	H	A	H	A	B	B	H	H	B	B	B
17987	A06	6282525	A	H	H	H	H	H	H	A	H	B	B	B	B	A	A	H	H	H	A	H	H	H	-	B	A	H	A	A	H	A	H	B	H	A	H	H	H	A	H	A	B	B	H	H	-	B	B
18006	A06	6327479	A	H	H	H	H	H	H	-	H	B	B	B	B	A	A	H	H	H	A	H	H	H	A	B	A	H	A	A	H	A	H	B	H	A	H	H	H	A	H	A	B	B	H	H	B	B	B
18028	A06	6450654	A	H	H	H	H	H	H	-	H	B	B	B	B	A	A	H	H	H	A	H	H	H	A	B	A	H	A	A	H	A	H	B	H	A	H	H	H	A	H	A	B	B	H	H	B	B	B
18029	A06	6452653	A	H	H	H	H	H	H	A	H	B	B	B	B	A	A	H	H	H	A	H	H	H	A	B	-	H	A	A	H	-	H	B	H	A	H	H	H	A	H	A	-	B	H	H	B	B	B
18056	A06	6617573	A	H	H	H	H	H	H	H	H	B	B	B	B	A	A	H	H	H	A	H	H	H	A	B	A	H	A	A	H	A	H	B	H	A	H	H	-	A	H	-	B	B	H	H	B	B	B
18057	A06	6617576	A	H	H	H	H	H	H	A	H	B	B	B	B	A	A	H	H	H	A	H	H	H	A	-	A	H	-	A	H	-	H	B	H	A	H	H	H	A	H	A	B	B	H	H	B	B	B
18060	A06	6630777	H	H	H	H	A	H	H	A	H	-	B	B	B	H	H	H	H	H	H	H	A	-	H	B	A	H	A	H	A	H	H	B	H	A	H	H	H	H	H	H	-	B	-	A	B	B	B
18132	A06	7222842	A	H	H	H	H	H	H	H	H	B	B	B	B	A	H	H	H	H	A	H	H	H	A	B	A	H	A	A	H	A	H	B	H	A	H	H	H	A	H	A	B	B	H	H	B	B	B
18135	A06	7254441	A	-	-	-	-	-	-	A	A	A	-	A	A	-	H	A	-	-	A	A	A	A	-	-	-	A	A	-	-	A	A	A	A	-	A	-	A	-	-	-	A	-	A	-	-	A	A
18171	A06	7460078	-	H	H	H	H	H	H	-	H	B	B	B	B	A	-	H	H	A	-	H	H	H	-	B	A	H	A	H	H	-	H	B	H	A	H	H	H	-	H	A	B	B	H	H	B	B	-
18179	A06	7497487	A	H	H	H	H	H	H	A	H	B	B	B	B	A	-	H	H	A	A	H	H	H	A	B	A	H	A	H	H	A	H	B	H	A	H	H	H	A	H	A	B	B	H	H	B	B	B
18199	A06	7628082	A	H	H	H	H	H	H	A	H	B	B	B	B	A	A	H	H	A	A	H	H	H	A	B	A	H	A	H	H	A	H	B	H	A	H	H	H	A	H	A	B	B	H	H	B	B	B
18202	A06	7637135	A	H	H	H	H	H	H	A	H	B	B	B	B	A	A	H	H	-	-	-	H	H	A	B	-	H	A	H	H	A	H	B	H	A	H	H	H	A	H	-	B	B	H	H	B	B	-
18232	A06	7869525	A	H	H	H	H	H	H	A	H	B	B	B	B	A	A	H	H	A	A	H	-	H	A	B	-	H	A	H	H	-	H	B	H	A	H	H	H	A	H	A	B	B	H	H	B	B	B
18238	A06	7905452	A	H	H	H	H	H	H	A	H	B	B	B	B	A	A	H	H	A	A	H	H	H	A	-	A	H	-	H	H	A	H	B	H	A	H	H	H	A	H	A	B	-	H	H	B	B	B
18245	A06	7969715	A	H	H	H	H	-	H	A	H	B	B	H	B	A	A	H	H	A	A	H	H	H	A	B	A	H	-	H	H	-	H	B	H	A	H	H	H	A	H	A	B	B	H	H	B	B	B
18265	A06	8176377	A	H	H	H	H	H	H	A	H	B	-	H	B	A	A	H	H	A	A	H	H	H	A	-	A	H	A	H	H	A	A	B	H	A	H	H	H	A	H	A	B	B	H	H	B	B	B
18266	A06	8176380	-	H	H	H	H	H	H	-	-	B	B	H	B	A	A	H	H	-	A	H	H	H	A	-	A	H	A	H	H	-	A	B	H	-	H	H	H	A	H	A	B	B	H	H	B	-	-
18283	A06	8325008	A	H	H	H	H	H	H	A	H	B	B	H	B	A	A	H	H	A	A	H	H	H	A	-	A	H	A	H	H	A	A	B	H	A	H	H	H	A	H	A	B	B	H	H	B	B	B
18286	A06	8342802	A	H	H	H	H	H	H	A	H	B	B	H	B	-	A	H	H	A	A	H	H	H	A	B	A	H	A	H	H	A	A	-	H	A	H	H	-	A	H	A	B	B	H	H	B	B	B
18292	A06	8401085	A	H	H	H	H	-	H	A	-	B	B	H	B	A	A	-	H	-	A	H	H	H	A	B	-	H	A	H	H	A	A	B	H	A	H	-	H	A	H	A	B	B	H	-	B	B	B
18306	A06	8525300	A	H	H	H	H	H	H	A	H	B	B	H	B	A	A	H	H	A	A	-	H	H	A	B	A	H	A	H	H	A	A	B	H	A	H	H	H	A	H	A	B	-	H	H	B	B	B
18308	A06	8528740	A	H	H	H	H	H	H	A	H	B	B	H	B	A	A	H	H	A	A	H	H	H	A	B	A	H	A	H	H	A	A	B	H	A	H	H	H	A	H	A	B	B	H	H	B	B	B
18312	A06	8549565	H	H	H	H	H	H	H	-	H	B	B	H	B	A	A	H	H	A	A	H	H	H	A	-	A	H	A	H	H	A	A	B	H	A	H	B	H	A	H	A	B	B	H	H	B	B	B
18333	A06	8675212	A	H	H	H	H	H	H	A	H	-	B	H	-	A	A	H	H	A	A	H	H	H	A	-	A	H	H	H	H	A	A	B	H	A	H	H	H	-	H	A	-	B	H	H	B	B	B
18337	A06	8687000	A	H	H	H	H	H	H	A	H	B	B	H	B	A	A	H	H	A	A	H	H	H	A	B	A	H	H	H	H	A	A	B	-	A	H	H	H	A	H	A	B	B	H	H	B	B	B
18388	A06	9115922	A	H	H	H	H	-	H	A	-	B	B	H	B	A	A	H	H	-	A	H	H	H	A	-	A	H	H	-	H	A	A	B	H	A	-	H	H	A	H	A	-	B	H	H	B	-	B
18405	A06	9269471	A	H	H	H	H	H	H	A	H	B	B	H	-	A	A	H	H	A	-	H	H	H	A	-	-	H	H	H	H	-	-	B	H	A	H	H	H	A	H	-	B	-	H	H	B	-	-
18438	A06	9422872	A	H	H	H	H	H	H	A	H	B	B	H	-	A	A	H	H	A	A	H	H	H	A	B	A	H	H	H	H	A	A	B	H	A	H	H	H	A	H	A	B	B	H	H	B	B	B
18439	A06	9422875	A	H	H	-	H	H	H	A	H	B	-	H	B	A	A	H	H	A	A	-	H	-	-	-	A	H	H	H	H	A	A	B	H	A	H	H	H	A	H	A	B	B	H	H	B	B	-
18441	A06	9443341	A	H	H	H	H	H	H	A	H	B	B	H	B	A	A	H	H	A	A	H	H	H	A	B	A	H	H	H	H	A	A	B	H	A	H	H	-	A	H	A	B	B	H	H	B	B	B
18443	A06	9453771	A	H	H	H	H	H	H	A	H	B	B	H	B	A	A	H	H	A	A	H	H	H	A	B	A	H	H	H	H	A	A	B	H	A	H	H	H	A	H	A	B	B	H	H	B	-	B
18469	A06	9758325	A	H	B	H	H	H	B	A	H	B	B	H	B	A	A	H	H	A	A	H	H	H	A	B	A	H	H	H	H	H	A	B	H	A	H	H	H	A	H	A	B	B	H	H	B	B	B
18473	A06	9765104	A	H	B	H	H	H	B	A	H	B	B	H	B	A	A	H	H	A	A	H	H	H	A	-	-	H	H	H	H	H	A	B	H	A	H	H	H	A	H	A	B	-	H	H	B	B	B
18493	A06	9952409	-	H	B	H	H	H	-	-	H	B	B	H	B	A	A	H	H	A	A	H	-	H	A	B	-	H	H	H	H	H	A	B	H	A	H	H	H	-	H	A	-	B	H	H	B	-	B
18494	A06	9952412	A	H	B	H	H	H	B	A	H	B	B	H	B	A	A	H	H	A	A	H	H	H	A	B	A	H	H	H	H	H	A	B	H	-	H	H	H	A	H	A	B	B	H	H	B	B	B
18531	A07	10363474	H	B	H	H	H	H	H	H	H	H	H	H	H	B	H	H	H	H	A	H	H	H	A	H	A	A	H	H	H	B	H	H	H	H	H	A	H	H	H	A	B	H	H	A	B	H	H
18532	A07	10363477	H	B	H	H	H	H	H	H	H	H	H	H	H	B	H	H	H	H	A	H	H	H	A	H	A	A	H	H	H	-	H	H	H	H	H	A	H	H	H	A	B	H	H	A	B	H	H
18539	A07	10382097	H	B	H	H	H	H	H	H	H	H	H	-	H	B	H	H	H	H	A	H	H	H	A	H	A	A	H	H	H	B	H	H	H	H	H	A	H	H	H	A	B	H	H	-	B	H	H
18544	A07	10434652	H	B	H	H	H	H	H	H	H	H	H	H	H	H	H	H	H	H	A	H	H	H	A	H	A	A	H	H	H	B	H	H	H	H	H	A	H	H	H	A	B	H	H	A	B	H	H
18553	A07	1055234	H	B	B	H	H	A	H	B	H	H	H	H	H	H	B	H	B	B	H	H	H	H	A	H	A	A	-	H	H	B	H	H	B	H	B	H	H	H	H	A	H	H	A	A	B	H	H
18574	A07	10819581	H	B	H	H	H	H	H	H	H	H	H	H	H	B	H	H	B	H	A	H	H	H	A	H	A	A	H	H	H	-	H	H	H	H	H	A	H	B	H	A	B	H	H	A	-	H	H
18580	A07	10939616	H	-	H	H	H	H	H	H	H	H	H	H	H	B	H	H	B	H	A	H	H	H	A	H	A	A	H	H	H	B	H	H	H	H	H	A	H	B	H	A	B	H	H	A	B	H	H
18600	A07	11105126	H	B	H	H	H	H	H	H	H	H	H	H	H	B	H	H	B	H	A	H	H	H	A	H	A	A	H	H	H	B	H	H	H	H	H	A	H	B	H	A	B	H	H	A	B	H	H
18609	A07	11173612	H	B	H	H	H	H	H	H	H	H	-	H	H	B	H	H	-	H	A	H	H	H	A	H	A	A	H	H	H	B	H	H	H	H	H	A	H	B	H	-	B	H	H	A	B	H	H
18728	A07	12084378	H	H	B	H	A	H	H	H	H	A	H	H	H	H	H	A	H	H	A	H	H	H	H	B	A	B	H	B	H	B	B	H	H	A	B	H	H	-	H	H	A	H	H	H	H	B	B
18748	A07	12325636	H	B	H	H	H	H	H	H	H	H	H	H	H	B	-	H	B	H	A	H	H	H	A	H	A	A	-	H	H	B	H	H	H	H	H	A	H	B	H	-	B	H	H	H	-	H	H
18758	A07	12395361	A	H	H	H	H	B	A	H	B	B	A	H	H	H	H	H	H	H	B	B	H	B	B	H	A	B	A	B	H	H	A	A	A	H	H	A	B	B	B	B	-	H	A	B	A	B	H
18780	A07	12527742	H	B	H	H	H	H	H	H	H	H	H	H	H	B	H	A	B	H	A	H	H	H	A	H	A	A	H	H	H	B	H	H	H	H	H	A	H	B	H	A	B	H	H	H	B	H	A
18785	A07	12617150	H	-	H	H	H	H	H	H	H	H	H	H	H	B	H	A	B	H	A	H	H	H	-	H	A	A	H	H	H	B	H	H	H	H	H	A	H	B	H	A	B	H	H	H	B	H	A
18789	A07	12648810	B	-	H	H	H	H	H	H	H	H	H	H	H	B	H	A	B	H	A	H	H	H	A	H	-	A	H	H	H	-	H	H	H	H	H	A	H	B	H	-	B	H	-	H	B	H	A
18805	A07	12710655	B	B	H	H	H	H	H	H	H	H	H	H	H	B	H	-	B	A	A	-	H	H	A	H	A	A	H	H	H	B	H	H	-	H	H	A	H	B	H	A	-	H	H	H	-	H	A
18806	A07	12710658	B	-	H	H	H	H	H	H	H	H	H	H	H	B	H	A	-	-	-	H	H	H	-	H	-	A	H	H	H	-	-	H	H	H	H	A	H	B	H	A	-	H	H	H	-	H	-
18831	A07	12879062	B	B	H	H	H	H	H	H	H	H	H	H	H	-	H	-	B	A	-	H	H	H	-	H	A	-	H	H	H	-	H	H	H	H	H	-	H	B	H	A	-	H	H	H	-	H	A
18836	A07	12910564	B	B	H	H	H	H	H	H	H	H	H	H	H	B	H	A	-	-	A	H	H	H	A	H	A	A	-	H	H	-	-	H	H	H	H	A	H	B	H	-	B	H	H	H	-	H	-
18881	A07	13293801	-	B	H	H	H	H	H	H	H	H	-	-	H	-	H	-	B	A	-	H	H	H	A	H	-	A	H	H	H	-	H	H	H	H	H	A	H	B	H	A	-	H	H	H	-	H	-
18893	A07	13579887	B	H	H	H	H	-	H	H	B	H	A	A	H	B	H	H	B	B	A	-	H	H	-	A	A	H	-	B	H	B	-	A	H	H	B	H	-	B	H	H	B	A	-	H	-	H	A
18894	A07	13579890	B	H	H	H	H	A	H	H	B	H	A	A	H	B	H	H	B	B	A	A	H	H	A	A	A	H	H	B	H	B	B	A	H	H	B	H	H	B	H	H	B	A	H	H	A	H	A
18896	A07	13615605	B	H	H	H	H	A	H	H	-	H	A	A	H	B	H	H	B	-	A	A	H	H	A	A	A	H	H	B	H	B	B	A	H	H	-	H	H	B	H	H	-	A	H	H	A	H	A
18899	A07	13651586	H	H	H	H	H	-	H	H	H	H	H	H	H	H	H	H	-	H	H	-	H	A	H	A	A	A	H	A	H	H	H	H	H	H	H	H	H	-	H	H	H	H	H	H	H	H	H
18911	A07	13726086	H	B	H	H	H	H	H	H	H	H	H	A	H	B	A	A	B	A	A	H	H	H	A	H	A	A	H	H	H	B	H	H	H	H	H	A	H	B	H	A	B	H	H	H	B	H	A
18923	A07	13793251	H	B	-	H	H	H	H	H	H	H	H	A	H	B	A	A	B	A	A	H	H	H	A	H	A	A	H	H	H	B	H	H	H	H	H	-	H	B	H	A	B	H	H	H	B	H	A
18939	A07	13886936	H	B	H	H	H	H	H	H	H	H	H	-	H	B	-	A	-	A	A	H	H	H	-	H	A	A	H	-	H	-	H	H	H	H	H	-	H	B	H	-	-	H	H	H	-	H	A
18941	A07	13898914	H	H	A	H	H	A	H	H	-	H	H	H	H	H	H	H	H	H	H	A	H	-	H	A	A	A	H	A	H	H	H	H	H	H	H	H	H	H	H	H	H	H	H	H	H	H	H
19027	A07	14687745	H	B	H	H	H	H	H	H	H	H	H	A	H	B	A	A	B	A	A	H	H	H	A	H	A	A	H	H	H	B	H	H	H	H	H	A	H	B	H	A	B	H	H	H	B	H	A
19041	A07	14854219	H	B	H	H	H	H	H	H	H	A	H	A	H	B	A	A	-	A	A	H	H	H	A	H	A	A	H	H	H	B	H	H	H	H	H	A	A	B	H	A	B	H	H	H	B	H	A
19049	A07	14954158	H	B	H	H	H	H	H	H	H	-	H	A	H	B	A	A	B	A	A	H	H	H	A	H	A	A	H	H	H	B	H	-	H	H	H	A	A	B	H	A	B	H	H	H	B	H	A
19053	A07	14960375	H	H	H	-	H	H	H	A	H	H	H	H	H	H	H	H	H	H	-	H	H	H	H	H	H	H	H	H	H	H	H	H	H	H	H	-	H	H	H	H	H	H	H	H	H	H	H
19064	A07	15022947	-	B	H	H	H	H	H	H	H	A	H	A	H	B	A	A	-	A	A	H	H	H	A	H	A	A	H	H	H	B	H	H	H	H	H	A	H	B	H	A	B	H	H	H	B	H	A
19068	A07	15052025	H	B	H	H	H	H	H	-	H	A	H	A	H	B	A	A	B	A	A	H	H	H	A	H	A	A	H	H	H	B	H	H	H	H	H	A	-	-	H	A	B	H	H	H	B	H	A
19099	A07	15314997	H	B	H	H	H	H	H	H	H	A	H	A	H	B	A	A	B	A	A	H	H	H	A	H	A	A	H	H	H	B	H	H	H	H	H	A	A	B	H	A	-	H	H	H	B	H	A
19100	A07	15319185	H	B	A	H	H	H	H	H	H	A	H	A	H	B	A	A	B	A	A	H	H	H	A	H	A	A	H	H	H	B	H	H	H	H	H	A	A	B	H	A	B	H	H	H	B	H	A
19102	A07	15347280	H	-	A	H	H	H	H	H	H	A	H	A	H	-	A	A	B	-	-	-	H	H	A	H	A	A	H	H	H	B	H	H	H	H	H	A	A	B	H	-	-	H	H	H	B	H	A
19113	A07	15534833	H	B	-	H	H	H	H	H	H	-	B	-	H	B	A	A	B	A	A	-	H	H	A	H	A	-	H	H	H	-	H	H	H	H	H	-	A	B	H	A	B	H	H	H	-	H	A
19165	A07	15912638	H	B	A	H	H	H	H	H	H	A	B	-	H	B	-	A	B	A	A	B	H	H	A	H	A	A	-	B	H	B	H	H	H	H	H	A	A	B	B	A	B	-	H	H	B	H	-
19167	A07	15919872	H	B	A	H	H	H	H	H	H	A	B	A	H	-	A	-	B	A	A	B	H	H	A	H	A	A	H	B	H	-	H	H	H	H	H	-	A	B	-	A	B	H	H	H	B	H	A
19186	A07	16012064	-	B	A	-	H	H	H	H	H	A	B	-	H	B	A	A	H	A	A	B	H	H	A	H	A	A	H	B	H	B	H	H	H	H	H	A	A	B	B	A	H	H	H	H	B	H	A
19190	A07	16025192	H	B	A	H	H	H	H	H	H	-	B	-	-	B	-	-	H	A	A	B	H	H	A	H	-	A	H	B	H	-	H	H	H	H	H	-	A	B	-	A	H	H	H	H	-	H	A
19192	A07	16032203	H	B	A	H	H	H	H	H	H	A	B	A	H	B	A	A	H	A	A	B	H	H	A	H	A	A	H	B	H	B	H	H	H	H	H	-	A	B	-	-	H	H	H	H	B	H	-
19205	A07	16112940	H	B	A	H	H	H	H	A	H	A	-	A	H	B	A	A	H	A	A	-	H	H	A	H	A	A	H	B	H	B	-	H	H	H	H	-	A	B	B	A	H	H	H	H	B	H	A
19206	A07	16112943	H	B	-	H	H	H	H	A	H	A	B	-	H	B	A	-	H	A	-	-	H	H	A	H	A	A	H	B	H	B	H	H	H	H	H	A	A	B	B	A	H	H	H	H	B	H	A
19207	A07	16115930	H	B	A	H	H	H	H	A	H	-	B	A	H	B	-	A	H	A	-	B	H	H	-	H	A	A	H	B	H	-	H	H	H	H	H	A	A	B	B	A	H	H	H	H	B	H	A
19225	A07	16237906	H	B	A	H	H	H	H	A	H	A	B	A	H	-	-	A	H	A	A	B	H	H	A	H	A	H	H	B	H	-	H	H	H	H	H	A	A	B	B	-	-	H	H	H	-	H	A
19226	A07	16238582	H	B	A	H	H	H	H	A	H	A	-	A	H	B	A	A	H	A	A	B	H	H	A	H	A	H	H	B	H	B	H	H	H	H	H	A	A	B	B	A	H	H	H	H	B	H	A
19227	A07	16238585	H	B	A	H	H	H	H	-	-	A	B	-	H	B	-	A	H	A	-	-	H	H	A	H	A	H	H	B	H	B	H	-	H	-	H	-	-	B	B	-	H	H	H	H	-	H	-
19228	A07	16239075	H	B	A	H	H	H	H	A	H	A	B	A	H	B	A	A	H	A	A	B	H	H	A	H	A	H	H	B	H	B	H	H	H	H	H	A	A	B	B	A	H	H	H	H	B	H	A
19234	A07	16245205	H	B	A	H	H	H	H	A	H	A	B	A	A	B	A	A	H	A	A	B	H	H	A	H	A	H	H	B	H	B	H	H	H	H	H	A	A	B	B	A	H	H	H	H	B	H	A
19247	A07	16306139	H	B	A	H	H	H	H	-	H	A	B	A	A	B	-	A	H	A	A	B	H	H	A	H	A	H	H	B	H	B	H	H	H	H	H	A	A	B	B	A	H	H	H	H	B	H	A
19256	A07	16364231	H	B	-	H	H	H	H	A	H	-	-	A	A	B	A	-	H	A	A	B	H	H	-	H	A	H	H	B	H	B	H	H	H	H	H	A	A	B	B	A	H	H	H	H	-	H	A
19279	A07	16526241	H	B	A	H	H	H	H	A	H	A	B	A	A	B	A	A	H	A	A	B	H	H	A	B	A	H	H	B	H	B	H	H	H	H	H	A	-	B	B	A	H	H	H	H	B	H	A
19286	A07	16572510	A	B	A	H	H	H	H	A	H	A	B	A	A	B	A	A	H	A	A	B	H	H	A	B	A	H	H	B	H	B	H	A	H	H	H	A	A	B	B	A	H	H	H	H	B	H	A
19289	A07	16591191	A	B	A	H	H	H	H	A	H	-	B	A	A	B	A	A	H	A	A	-	H	H	A	B	A	H	H	B	H	B	H	A	H	H	B	A	A	B	B	-	H	H	H	H	B	H	A
19309	A07	16688971	A	B	A	H	H	H	H	A	H	A	B	H	A	B	A	A	H	A	-	-	H	H	A	B	A	H	H	-	H	B	H	A	H	H	B	A	A	B	B	A	H	H	H	H	-	H	A
19323	A07	16788699	A	H	-	H	H	H	H	-	H	A	B	H	A	B	A	A	H	-	-	B	H	H	A	-	A	H	-	B	H	-	H	A	-	-	B	-	-	B	B	A	H	H	H	H	B	H	-
19325	A07	16807296	A	H	A	H	H	H	H	A	H	A	B	H	A	B	A	A	H	A	A	B	H	H	A	B	A	H	B	B	H	B	H	A	H	H	B	A	A	-	B	A	H	H	H	H	B	H	A
19331	A07	16851220	B	H	H	H	B	A	H	H	H	H	A	A	H	B	A	H	B	B	A	A	H	H	A	A	A	H	H	B	A	B	B	H	H	H	B	B	H	B	H	H	B	A	H	H	A	H	A
19340	A07	16897941	A	H	A	H	H	-	H	A	H	A	B	H	A	B	A	A	H	A	A	B	H	H	A	B	-	H	B	B	H	B	H	A	H	H	B	A	A	B	B	A	H	H	H	H	B	H	A
19363	A07	16992268	A	H	A	H	H	H	H	A	H	A	B	H	A	B	A	-	H	A	A	-	H	H	A	B	A	H	B	B	-	B	H	-	H	H	B	A	A	B	B	A	H	H	H	H	H	H	A
19371	A07	17051635	-	H	A	H	H	-	H	A	H	A	B	H	-	B	A	-	H	A	A	B	H	H	-	B	A	H	B	B	H	B	H	A	H	H	B	-	A	B	-	A	H	H	H	H	H	H	A
19380	A07	17086809	A	H	-	H	H	H	H	A	H	A	B	H	A	B	A	A	H	A	-	B	H	H	A	B	A	H	B	B	H	B	H	A	H	H	B	A	A	B	B	A	H	H	H	H	H	H	A
19395	A07	17173941	A	H	A	H	H	H	H	A	H	A	B	H	A	B	A	A	H	A	A	B	H	H	A	B	A	H	B	B	H	B	H	A	H	H	B	A	A	B	B	A	H	H	H	H	H	H	A
19417	A07	17329426	A	H	-	H	H	H	H	A	H	A	B	H	-	B	-	A	H	-	A	B	H	H	A	B	A	H	B	B	H	B	H	A	H	H	B	A	A	B	B	A	H	H	H	H	H	H	A
19419	A07	17345904	A	H	A	H	H	H	H	-	H	H	B	-	A	B	A	A	H	A	A	B	H	H	-	B	A	H	-	B	H	B	H	-	H	-	B	A	-	B	B	-	H	H	H	H	H	H	A
19426	A07	17385789	-	H	-	H	H	H	H	A	H	A	B	H	A	B	A	A	H	-	A	B	H	H	A	B	A	H	B	B	H	B	H	A	H	H	B	A	-	B	B	-	H	H	H	H	H	H	A
19434	A07	17401786	-	H	-	H	H	H	H	-	H	A	B	-	-	-	A	A	H	-	-	-	-	H	A	B	-	H	B	-	H	-	H	A	H	H	B	A	-	B	B	A	H	H	H	H	H	H	A
19452	A07	17511803	A	-	A	H	H	H	H	-	H	-	B	H	A	B	A	A	H	A	-	B	H	H	A	B	A	H	B	B	H	B	H	A	H	H	B	A	A	B	B	A	H	H	H	H	H	H	A
19458	A07	17597604	A	H	A	H	H	H	H	A	H	A	B	H	A	B	A	A	H	A	A	B	H	H	A	B	A	H	B	B	H	B	H	A	H	H	B	-	A	B	B	A	H	H	H	H	H	H	A
19459	A07	17597607	A	H	A	H	-	H	H	A	H	A	B	H	A	B	A	A	H	A	A	B	H	H	A	-	A	H	B	B	H	B	H	A	H	H	B	A	A	B	B	-	H	H	H	H	H	H	A
19462	A07	17625768	A	H	A	H	-	H	H	A	H	A	B	H	A	B	A	A	H	A	A	B	H	H	A	B	A	H	B	B	H	B	H	A	H	H	B	A	A	B	B	A	H	H	H	H	H	H	A
19464	A07	17626050	A	H	-	H	H	H	H	-	H	-	-	H	-	-	-	-	-	-	-	B	H	H	-	-	A	H	B	-	H	-	H	A	H	H	-	-	-	-	-	-	H	-	H	H	H	H	A
19467	A07	17628254	A	H	A	H	H	H	H	A	H	A	B	H	A	B	A	A	H	A	-	B	H	H	A	B	A	H	B	B	H	B	-	A	H	H	B	A	-	B	B	A	H	H	H	H	H	H	A
19472	A07	17661893	-	H	A	H	H	H	H	A	H	A	B	H	-	B	A	A	H	A	-	B	H	H	A	B	A	H	-	-	H	B	H	A	H	H	B	A	A	-	B	A	H	H	H	H	H	H	A
19492	A07	17788373	A	H	-	H	H	H	H	A	H	A	B	H	A	B	A	A	H	A	A	B	H	H	A	B	A	H	B	-	H	B	H	A	H	H	B	A	A	B	-	A	-	H	H	H	H	H	A
19507	A07	17908466	A	H	-	H	H	H	H	A	H	A	B	H	A	B	A	A	H	A	A	B	H	H	A	B	A	H	B	B	H	B	H	A	H	H	B	A	A	B	B	A	H	B	H	H	H	H	A
19508	A07	17908469	A	H	-	H	H	H	H	A	H	A	B	H	A	B	A	A	H	A	A	B	H	H	A	B	A	H	-	B	H	B	H	-	H	H	B	A	A	B	B	-	H	B	H	H	H	H	A
19516	A07	1805832	H	B	B	H	H	A	H	B	H	H	H	H	H	B	B	H	B	H	H	H	H	H	A	H	A	-	A	H	H	B	H	H	B	H	B	H	-	H	H	A	B	H	A	A	B	H	H
19524	A07	18204692	A	H	A	H	H	H	H	-	H	A	B	H	A	B	A	A	H	A	-	B	H	H	A	B	A	H	B	B	H	B	H	A	H	H	B	A	A	B	B	A	H	B	H	H	H	H	A
19531	A07	18256351	A	H	A	H	H	H	B	A	H	A	B	H	A	B	A	-	H	A	A	B	H	H	A	B	A	B	B	B	H	B	H	A	H	H	B	A	A	B	B	A	H	B	H	H	H	H	A
19536	A07	18306386	A	H	-	H	H	H	B	A	H	-	B	H	A	B	A	-	H	A	A	-	H	-	A	-	A	B	B	-	H	B	H	A	H	H	-	-	A	-	B	A	H	-	H	H	H	H	A
19537	A07	18310167	A	H	A	H	H	H	B	A	H	A	B	H	A	B	A	A	H	A	A	B	H	H	A	-	A	-	B	B	H	-	H	-	H	H	B	A	A	B	-	A	H	B	H	H	H	H	A
19538	A07	18310964	A	H	-	H	H	H	B	A	H	-	B	H	A	B	A	A	H	-	-	B	H	H	A	B	A	B	B	B	H	B	H	A	H	H	-	A	A	-	-	A	H	B	-	H	H	H	A
19539	A07	18313207	A	H	A	H	H	H	B	A	H	A	B	H	A	B	A	A	H	A	A	B	H	H	A	B	A	B	B	B	H	B	H	A	H	H	B	A	A	B	B	A	H	B	H	H	H	H	A
19540	A07	18313440	A	H	A	H	H	H	B	A	H	A	-	H	A	B	A	A	H	A	-	B	H	H	A	B	-	B	B	-	H	B	H	-	H	H	B	A	A	B	B	A	H	B	H	H	H	H	A
19546	A07	18451723	A	H	A	-	H	H	B	-	H	A	B	-	A	B	A	A	H	A	A	B	H	H	A	-	A	B	-	B	H	B	H	A	H	H	B	A	-	B	B	A	H	B	H	H	H	H	A
19552	A07	18516674	A	H	A	H	H	H	B	A	H	A	-	H	A	B	A	A	H	-	A	B	H	H	-	B	A	B	B	B	H	B	H	-	H	H	-	A	A	B	B	A	H	B	H	H	H	H	A
19555	A07	18518257	A	H	A	H	H	H	B	A	H	A	B	H	A	-	A	A	H	A	A	-	H	H	-	B	A	B	B	B	H	-	H	A	H	H	B	A	-	B	-	A	H	B	H	H	H	H	A
19568	A07	18702408	A	H	A	H	H	H	B	A	H	A	B	H	A	B	A	A	H	A	A	B	H	H	A	B	A	B	B	B	H	B	H	A	H	H	B	A	A	B	B	A	H	B	H	H	H	H	A
19578	A07	18758606	A	H	A	H	H	H	B	A	H	-	B	H	A	B	A	A	H	A	-	B	H	H	A	B	A	B	B	B	H	B	H	A	H	H	B	-	A	B	B	A	H	B	H	H	H	-	A
19579	A07	18765439	A	H	A	H	H	H	B	A	H	A	B	H	-	B	A	A	H	A	A	B	H	H	A	B	A	B	B	B	H	B	H	A	H	H	B	-	-	-	B	A	H	B	H	H	H	H	A
19582	A07	18769632	A	H	-	H	H	H	B	A	H	A	B	H	A	B	A	A	H	A	A	B	H	H	A	B	A	B	B	B	H	B	H	A	H	H	B	A	A	B	B	A	H	B	H	H	H	H	A
19583	A07	18770663	A	H	A	H	H	H	B	A	H	A	B	H	A	B	A	A	H	A	A	B	H	H	A	B	A	B	B	B	H	B	H	A	H	H	B	A	A	B	B	A	H	B	H	H	H	H	-
19584	A07	18770666	A	H	-	H	H	H	B	A	-	A	-	H	-	B	A	-	H	-	-	B	H	H	-	-	A	-	-	B	H	B	H	A	H	H	-	A	-	-	B	A	H	B	H	H	H	H	-
19588	A07	18782354	A	H	A	H	-	H	B	A	H	A	B	H	A	-	A	A	H	A	-	B	H	H	A	B	A	-	B	B	H	B	H	A	H	H	B	-	A	B	-	-	H	B	H	H	H	H	A
19590	A07	18815961	A	H	A	H	H	H	B	A	H	A	B	-	A	-	A	A	H	-	-	B	H	H	-	B	-	B	-	B	H	-	H	A	H	H	B	A	A	B	B	-	H	B	H	H	H	H	A
19591	A07	18820134	H	-	H	H	H	H	H	H	H	H	H	H	H	H	H	H	H	H	H	H	H	H	H	B	H	H	H	-	H	H	H	H	H	H	H	H	H	H	H	H	H	H	H	H	H	H	H
19599	A07	18884443	-	H	A	H	H	H	B	A	-	-	B	H	A	B	A	A	H	A	-	B	H	H	A	B	A	B	B	B	H	B	H	A	H	H	B	A	A	B	B	A	H	B	H	H	H	H	A
19601	A07	18887234	A	H	A	H	H	H	-	A	H	A	B	H	A	B	A	-	H	A	A	B	H	H	A	B	-	B	B	B	H	B	H	A	H	H	B	A	-	B	B	A	H	B	H	H	H	H	A
19631	A07	19063694	A	H	B	H	H	H	B	A	H	B	B	H	B	A	A	H	H	A	A	H	H	H	A	B	A	H	H	H	H	H	A	-	H	-	H	H	A	A	H	A	B	-	H	H	H	B	B
19637	A07	19096467	A	H	A	H	H	H	B	A	H	A	B	H	A	B	A	-	H	A	A	B	H	H	A	B	A	B	B	B	H	B	A	A	H	H	B	A	A	B	B	A	H	B	H	H	H	H	A
19638	A07	19096470	A	H	A	H	H	H	B	A	H	A	B	H	A	B	A	A	H	A	A	B	H	-	-	B	A	B	B	B	H	B	A	A	H	H	-	A	A	B	B	A	H	B	H	H	H	H	A
19649	A07	19130534	A	H	A	H	H	H	B	A	H	A	B	H	A	-	A	A	H	A	A	B	H	H	A	B	A	B	B	B	H	B	A	A	H	H	B	A	-	B	B	-	H	B	H	H	H	H	A
19655	A07	19201268	A	H	A	H	H	H	B	A	H	A	B	H	A	B	A	A	H	A	A	B	H	H	A	B	A	B	B	B	H	B	A	A	H	H	B	A	-	B	B	A	H	B	H	H	H	H	A
19657	A07	19206873	A	H	A	H	H	-	B	-	H	A	B	H	A	B	-	A	H	A	A	B	H	H	A	B	A	B	B	B	H	B	A	A	H	H	B	A	A	B	B	A	H	B	H	H	H	H	A
19662	A07	19218538	A	-	A	-	-	-	B	A	H	A	B	-	A	B	A	A	-	A	A	B	H	-	A	B	A	B	B	B	H	B	A	A	-	-	B	A	A	B	B	A	H	B	-	H	H	H	-
19668	A07	19244531	A	H	A	H	H	H	B	-	H	-	B	H	A	B	A	-	H	A	A	B	H	H	A	B	A	B	B	B	H	B	-	-	H	H	B	A	-	B	B	A	H	B	H	-	H	H	A
19675	A07	19290287	A	H	A	H	H	H	-	A	H	A	-	H	A	-	A	-	H	A	-	-	H	H	A	-	A	B	B	H	-	-	-	-	-	H	-	A	A	B	-	-	H	B	H	-	H	H	A
19680	A07	19299589	A	H	A	H	H	H	B	A	H	A	B	H	-	B	A	A	H	A	-	B	H	H	A	B	A	B	B	H	H	B	-	A	H	H	-	-	A	-	B	A	-	B	H	H	H	-	A
19698	A07	19514159	A	H	-	H	H	H	-	-	H	A	B	H	A	B	A	A	H	A	-	B	H	H	A	-	A	B	B	H	H	B	H	A	H	H	B	A	A	B	-	A	H	B	H	H	H	H	A
19715	A07	19766622	A	H	A	H	H	H	B	A	H	-	B	H	-	B	A	A	H	A	A	B	H	H	A	B	A	B	B	H	H	B	H	A	H	H	B	A	A	B	H	A	H	B	H	H	H	H	A
19720	A07	1980228	H	B	B	H	H	A	H	B	H	H	H	H	H	B	B	H	B	H	H	H	H	H	A	H	A	A	A	H	H	B	H	H	B	H	B	H	-	H	H	-	B	H	A	A	B	H	H
19734	A07	19928305	A	H	A	H	H	H	B	A	H	A	-	H	A	B	A	A	H	A	A	B	H	H	A	B	A	B	B	-	H	B	H	A	A	H	H	A	A	H	H	A	H	B	H	H	H	H	A
19745	A07	19986250	A	H	A	H	-	H	B	A	H	A	B	H	A	B	A	A	H	A	A	-	H	H	A	B	A	B	-	H	H	B	H	A	A	H	H	A	-	H	H	A	H	B	H	H	H	H	A
19765	A07	20040092	A	H	A	H	H	H	-	A	H	A	B	H	A	B	A	A	H	A	A	B	H	H	A	B	A	B	B	H	H	B	H	A	A	A	H	A	A	H	H	A	H	-	H	H	H	H	A
19770	A07	20058746	A	H	A	H	H	H	B	A	H	A	-	H	A	-	A	A	H	A	A	B	H	H	A	B	-	-	B	H	H	B	H	A	A	H	H	A	A	H	H	-	H	B	H	H	H	H	A
19781	A07	20221239	A	-	A	H	H	H	B	-	H	A	B	H	A	B	A	A	H	A	A	B	H	H	A	-	A	B	B	H	H	-	H	A	A	A	H	A	A	H	H	-	H	B	H	H	H	H	A
19782	A07	20221242	A	H	A	H	H	H	B	-	H	-	B	H	A	B	A	A	H	A	A	-	H	H	A	B	A	B	B	H	H	B	H	-	-	A	H	A	A	-	H	A	H	B	H	H	H	H	A
19794	A07	2031102	H	B	B	H	H	-	H	B	H	H	H	H	H	B	B	H	B	H	H	H	H	H	A	H	A	A	A	H	H	-	H	H	B	H	B	H	H	H	H	A	B	H	A	A	B	H	H
19805	A07	20398217	A	H	A	H	H	H	B	A	H	A	B	H	A	B	A	A	H	A	A	B	H	H	A	-	A	B	B	H	H	B	H	A	A	A	H	A	A	H	H	A	H	B	H	H	H	H	A
19819	A07	20573551	A	H	A	H	H	H	B	A	H	-	-	H	A	B	A	A	H	A	A	B	H	H	-	B	A	B	B	H	H	B	H	A	A	A	H	A	A	H	H	A	H	B	H	H	H	H	-
19821	A07	20576741	A	H	A	-	H	H	B	A	H	-	B	H	A	B	A	A	H	A	A	-	H	H	A	B	A	B	B	-	H	B	H	A	A	A	H	A	-	H	H	A	H	B	H	-	H	H	A
19822	A07	20576744	A	H	A	H	H	H	-	A	H	-	B	H	-	B	-	A	H	A	A	-	H	H	-	B	A	B	B	H	H	-	H	A	-	-	H	-	A	H	H	A	H	-	H	H	H	H	A
19825	A07	20582295	A	H	A	H	H	H	B	A	H	A	B	H	A	B	A	A	H	A	A	B	H	H	A	B	A	B	B	H	H	B	H	A	A	A	H	A	A	H	H	A	H	B	H	H	H	H	A
19826	A07	20583988	A	H	A	H	H	H	B	A	H	A	B	H	A	B	A	A	H	-	A	B	H	H	A	B	A	B	B	H	H	B	H	A	A	A	H	A	-	H	H	A	-	B	H	H	H	H	A
19832	A07	20643802	A	H	A	H	H	H	-	A	H	A	B	H	A	B	A	A	H	A	A	B	H	H	A	B	A	B	B	H	H	B	H	A	A	A	H	A	A	H	H	A	H	B	H	H	H	H	A
19835	A07	20652435	A	H	A	H	H	H	B	A	H	A	B	H	A	B	A	A	H	A	A	B	H	H	A	B	A	-	B	H	H	B	H	A	A	A	H	A	A	H	H	A	H	B	H	H	H	H	A
19854	A07	20749477	A	H	A	H	H	H	-	A	H	A	B	H	A	B	-	A	H	A	A	B	H	H	A	B	-	B	B	H	H	B	H	A	A	-	H	A	A	H	-	A	H	B	-	H	H	H	A
19868	A07	20845095	A	H	-	H	H	H	-	A	H	-	-	H	A	B	A	A	H	A	-	B	H	H	A	B	A	B	B	H	H	B	H	A	A	A	H	A	A	H	-	A	H	-	H	H	H	H	-
19869	A07	20845098	A	H	-	H	H	H	B	A	-	-	B	H	A	B	A	A	H	A	A	-	H	H	A	B	A	B	-	H	H	B	H	A	A	A	H	A	A	H	H	-	H	B	H	H	H	H	-
19870	A07	20857116	A	H	A	H	H	H	B	A	H	A	B	H	A	B	A	A	H	A	A	B	H	H	A	B	A	B	B	H	H	-	H	A	A	A	H	A	A	H	H	A	H	B	H	H	H	H	A
19886	A07	20981347	A	H	A	H	H	H	-	A	-	A	B	H	A	B	A	A	H	A	A	-	H	H	A	B	A	B	-	H	H	-	H	A	A	A	H	A	A	H	H	A	-	B	H	H	H	H	A
19903	A07	21114405	A	H	A	H	H	H	H	A	H	A	B	H	A	B	A	A	H	A	A	B	H	H	A	B	A	B	B	H	H	B	H	A	A	A	H	A	A	H	H	A	H	B	H	H	H	H	A
19910	A07	21168831	A	-	A	H	H	H	B	A	H	-	B	H	-	B	-	A	H	A	-	-	H	H	A	-	-	-	B	H	H	B	H	A	A	A	H	A	A	H	-	A	H	B	H	H	H	H	A
19911	A07	21168834	-	H	-	H	H	H	B	A	H	-	B	H	-	-	-	-	H	A	A	-	H	H	-	B	-	B	-	H	H	-	H	-	-	-	-	-	-	H	-	-	H	-	-	H	-	-	-
19928	A07	2135939	H	H	H	H	H	H	H	H	H	H	H	H	H	H	H	H	H	H	A	H	A	H	A	H	A	A	H	H	H	H	H	H	H	H	H	A	H	H	H	A	H	H	H	A	H	H	H
19943	A07	21465823	-	-	A	H	H	H	-	A	H	-	B	H	A	B	A	A	H	A	A	B	H	H	A	B	A	B	-	H	H	B	H	A	A	A	H	A	-	H	H	A	H	B	H	H	H	H	A
19946	A07	21497725	A	H	A	H	H	H	-	-	H	A	B	H	-	B	A	A	H	A	A	B	H	H	A	B	A	B	B	H	H	B	H	A	A	A	H	A	A	H	H	A	H	B	H	H	H	H	A
19961	A07	21618276	A	H	A	H	H	H	B	A	H	A	B	H	A	B	A	A	H	A	A	B	H	H	-	B	A	B	B	H	H	B	H	A	A	A	H	A	A	H	H	A	H	B	H	H	H	H	A
19975	A07	21710187	A	H	A	H	H	-	B	A	H	A	B	H	A	B	A	A	H	A	A	-	H	H	A	-	A	B	B	H	H	B	H	-	A	-	H	A	A	H	H	A	H	-	H	H	H	H	A
19978	A07	21761497	A	H	-	H	H	H	B	A	H	A	B	H	A	B	A	A	H	A	A	B	H	H	-	B	A	B	B	H	H	B	H	A	A	-	H	A	A	H	H	A	H	B	H	H	H	H	A
19985	A07	21964699	A	H	-	H	H	H	-	A	H	A	B	H	A	B	A	A	H	A	A	B	H	H	A	B	A	B	B	H	H	B	H	A	A	A	H	A	-	H	H	A	H	B	H	H	H	H	A
20000	A07	22035666	A	H	A	H	H	H	-	A	H	A	-	-	A	B	A	-	H	-	-	-	H	H	A	B	A	B	B	H	H	B	H	A	A	A	-	A	A	H	H	A	H	-	H	H	H	H	A
20008	A07	22103850	A	H	A	H	H	H	B	A	H	A	B	H	A	B	A	A	H	A	A	B	H	H	A	B	A	B	B	H	H	B	-	A	A	A	H	A	-	H	H	A	H	B	H	H	H	H	A
20026	A07	22413552	H	H	H	B	B	H	B	-	A	H	B	A	H	B	H	H	H	B	H	H	H	H	B	H	H	H	B	H	H	H	B	H	H	H	-	A	H	H	H	H	A	A	H	-	B	B	B
20040	A07	22486142	A	H	A	H	H	H	B	A	H	A	B	H	A	-	A	A	H	A	A	B	H	H	-	B	A	B	B	H	H	B	H	A	A	A	H	A	A	H	H	-	H	B	H	H	H	H	A
20045	A07	22515992	H	H	-	H	H	H	B	H	A	B	B	H	B	A	-	A	H	H	H	A	H	H	H	B	H	H	H	-	H	H	H	B	H	A	A	H	A	A	H	H	B	-	A	H	H	B	B
20050	A07	22535875	A	-	A	H	H	H	B	A	H	-	B	H	-	B	A	A	H	-	A	-	H	H	A	B	A	-	-	H	H	B	H	A	-	A	H	A	A	H	H	-	H	B	H	H	H	H	-
20054	A07	2254712	B	B	H	H	H	H	B	H	H	H	H	-	H	H	H	H	A	A	H	A	B	A	B	H	H	H	-	B	A	H	H	B	B	H	A	A	H	B	A	B	H	A	H	H	H	H	B
20055	A07	22552746	A	H	A	H	H	H	B	-	H	A	B	H	A	B	A	A	H	A	-	B	H	H	A	B	A	B	-	H	H	-	H	A	A	-	H	A	A	H	H	A	H	B	H	H	H	H	A
20091	A07	22885681	A	H	-	H	H	H	B	A	H	A	B	H	A	B	A	A	H	A	A	B	H	H	A	B	A	B	B	H	H	B	H	A	A	A	H	A	A	H	H	-	H	B	H	H	H	H	A
20092	A07	22892439	A	H	A	H	H	H	B	A	H	-	-	H	-	-	A	-	H	A	-	B	H	H	-	B	A	B	B	H	H	B	H	A	A	A	H	A	A	H	H	A	H	B	H	H	H	H	A
20094	A07	22909378	A	H	A	H	H	H	B	A	H	A	B	H	A	B	A	A	H	A	A	-	H	H	A	B	A	B	B	H	H	B	H	A	A	A	H	A	A	H	H	A	H	B	H	H	H	H	A
20104	A07	22970441	A	-	A	H	H	H	B	A	H	A	B	H	A	B	A	A	H	A	A	B	H	H	A	-	A	B	B	H	H	B	H	A	A	A	H	A	A	H	H	A	-	B	H	H	H	H	A
20110	A07	23005656	A	H	A	H	-	H	-	A	H	-	B	H	A	B	A	-	H	A	A	B	H	H	A	B	A	B	B	H	H	B	H	A	A	A	H	A	A	H	H	A	H	B	H	H	H	H	A
20111	A07	23010536	A	H	A	H	H	H	B	A	H	A	B	H	A	B	A	A	H	A	A	B	H	H	A	B	A	B	B	H	H	B	H	A	A	A	H	A	A	H	H	A	H	B	H	H	H	H	A
20112	A07	23012242	A	H	A	-	H	H	B	A	H	A	B	H	A	B	A	A	H	A	A	B	H	H	A	B	A	B	B	H	H	B	H	A	A	A	H	A	A	H	H	-	H	B	H	H	H	H	A
20116	A07	23037984	A	H	A	H	H	H	B	A	H	A	B	H	A	B	A	-	H	-	-	B	H	H	A	-	A	B	B	H	H	B	H	A	A	A	H	A	A	H	H	-	H	B	H	H	H	H	A
20121	A07	23096962	A	H	A	H	H	H	-	A	-	A	B	H	-	B	A	A	H	A	-	-	H	H	A	B	A	B	B	H	H	B	H	-	A	A	H	A	A	H	H	A	H	B	H	H	H	H	A
20133	A07	23175067	A	H	A	H	H	H	B	A	H	A	B	H	A	B	A	A	H	A	A	B	H	H	A	B	A	B	B	H	H	B	H	A	A	A	H	A	A	H	H	A	H	B	H	H	H	H	A
20137	A07	23234984	A	H	A	H	H	H	B	A	H	A	B	H	A	B	A	A	H	A	A	B	H	H	A	B	A	B	B	H	H	B	H	A	A	A	H	A	A	H	H	A	H	B	H	H	H	H	A
20138	A07	23234987	A	H	A	-	H	H	B	A	H	A	-	H	A	-	A	-	H	A	A	B	H	H	A	B	A	B	B	H	H	B	H	-	-	A	H	A	A	H	H	A	H	B	H	H	H	H	A
20150	A07	23288101	-	H	-	H	H	H	-	A	-	A	-	H	A	-	-	-	H	-	A	-	H	H	-	B	A	B	-	H	H	-	H	A	-	-	H	A	A	H	-	-	H	B	H	H	H	H	-
20177	A07	23386482	A	H	A	H	H	H	B	A	H	A	B	H	A	B	A	A	H	A	A	B	H	H	A	B	A	B	B	H	H	B	H	A	A	A	H	A	A	H	H	A	H	B	H	H	H	H	A
20187	A07	23514696	A	-	A	H	H	H	B	A	H	A	B	H	A	B	A	A	-	A	A	B	H	H	A	B	A	B	B	H	H	B	H	A	A	A	H	A	A	H	H	A	H	B	H	H	H	H	A
20188	A07	23514699	-	H	-	-	H	H	B	A	H	A	B	H	A	B	A	A	H	A	A	B	H	H	-	-	A	B	B	H	H	B	H	A	-	-	-	A	A	-	H	A	H	-	H	H	H	H	A
20191	A07	23521559	A	H	A	H	H	H	B	A	H	A	B	H	A	B	A	A	H	A	A	B	H	H	A	B	A	B	B	H	H	B	H	A	A	A	H	A	A	H	H	A	H	B	H	H	H	H	A
20193	A07	23548161	A	H	A	H	H	H	B	A	H	A	B	H	A	B	A	A	H	A	A	B	H	H	A	B	A	B	B	H	H	B	H	A	A	A	H	A	A	H	H	A	H	B	H	H	H	H	A
20197	A07	23559757	A	H	A	H	H	H	B	-	H	A	B	H	A	B	A	A	H	A	-	B	H	H	A	B	A	B	B	H	H	B	H	A	A	A	H	A	-	H	H	A	H	B	H	H	H	H	A
20200	A07	23581584	A	H	A	H	H	H	B	A	H	-	-	H	A	-	A	A	H	A	A	B	H	H	A	-	A	B	B	H	H	B	H	A	A	A	H	A	A	H	H	A	H	B	H	H	H	H	A
20211	A07	23622959	A	H	A	H	H	H	B	A	H	A	B	H	A	B	A	A	H	A	-	-	H	H	-	B	A	B	-	H	H	B	H	A	-	-	H	A	A	H	H	A	H	B	H	H	H	H	A
20213	A07	23636902	A	H	A	H	H	H	B	A	H	-	B	H	A	B	A	A	H	-	A	B	H	H	A	-	-	B	-	H	H	B	H	A	-	A	H	A	A	H	H	A	H	-	H	H	H	-	A
20219	A07	23659557	A	H	-	H	H	H	B	-	H	A	B	H	A	-	A	A	H	-	A	B	H	H	A	B	A	B	B	H	H	B	H	A	-	A	H	A	A	H	H	A	H	-	H	H	H	H	A
20221	A07	23661295	A	H	A	H	H	H	B	A	H	A	B	H	A	B	A	A	H	A	A	B	H	H	A	B	A	B	-	H	H	-	H	A	A	A	H	A	A	H	H	A	H	B	H	H	H	H	A
20234	A07	23709011	A	H	A	H	H	H	B	A	H	A	B	H	A	B	A	A	H	A	A	B	H	H	A	B	A	B	B	H	H	B	H	A	A	A	H	A	A	H	H	A	H	B	H	H	H	H	A
20236	A07	23731208	A	H	A	H	H	H	B	A	H	-	B	H	A	B	A	A	H	A	A	B	H	H	A	-	A	B	B	H	H	B	H	A	A	A	-	A	A	H	H	A	H	B	H	H	H	H	A
20242	A07	23741937	A	H	A	H	H	H	B	A	H	A	B	H	A	B	A	A	H	A	A	B	H	H	A	B	A	B	B	H	H	B	H	A	A	A	H	A	A	H	H	A	H	B	H	H	H	H	A
20256	A07	23879598	A	H	H	H	H	H	H	A	-	H	H	H	H	A	A	H	H	A	-	H	H	H	A	-	A	H	H	H	H	-	-	H	H	A	H	H	A	A	H	A	H	H	-	H	A	H	H
20282	A07	24163232	A	H	A	H	H	H	-	A	H	A	B	H	A	B	A	-	H	A	A	-	H	H	A	B	A	B	B	H	H	-	H	A	A	-	H	A	A	H	H	A	H	B	H	H	H	H	A
20335	A07	24384750	-	H	A	H	H	H	B	A	H	A	B	H	A	B	-	A	H	A	A	B	-	H	-	B	-	B	B	H	H	B	H	-	A	-	H	A	-	H	H	-	H	B	H	H	H	H	-
20351	A07	24442998	A	H	A	H	H	H	B	A	H	A	B	H	A	B	A	A	H	A	A	B	H	H	A	B	A	B	B	H	H	B	H	A	A	A	H	A	A	H	H	A	H	B	H	H	H	H	A
20358	A07	24461783	A	H	A	H	H	H	B	H	H	A	B	H	A	B	A	A	H	A	A	B	H	H	A	B	A	B	B	H	H	B	H	A	A	A	H	A	-	H	H	A	H	B	H	H	H	H	A
20360	A07	24486196	-	H	A	H	-	H	B	H	H	-	B	H	A	B	A	A	-	-	A	B	H	H	A	B	A	-	-	H	H	-	H	A	-	A	H	A	A	H	H	A	H	-	H	H	H	H	A
20368	A07	24533461	A	H	A	H	H	H	B	H	H	A	B	H	A	B	A	A	H	A	A	B	H	H	A	B	A	B	B	H	H	B	H	A	A	A	H	A	A	H	H	A	H	B	H	H	H	H	A
20373	A07	24633783	A	H	-	H	-	H	-	B	H	A	B	H	A	B	A	A	H	A	A	B	H	H	-	-	A	B	B	H	H	B	H	A	A	A	H	A	A	H	H	A	H	B	H	H	H	H	A
20377	A07	24639765	A	H	A	H	H	H	B	H	H	A	B	H	A	B	A	A	H	A	A	B	H	H	A	B	A	B	B	H	H	B	H	A	A	A	H	A	A	H	H	A	H	B	H	H	H	H	A
20378	A07	24639768	A	H	A	H	H	H	B	H	H	A	B	H	A	B	A	A	H	A	A	B	H	H	-	-	A	B	B	H	H	B	H	A	A	A	H	A	A	H	H	A	H	B	H	H	H	H	A
20386	A07	24686375	A	H	-	H	H	-	B	-	-	A	B	H	A	B	A	A	H	-	A	B	H	H	A	B	A	B	B	H	H	B	H	A	A	A	H	A	A	H	-	A	-	B	H	H	H	H	-
20388	A07	24711265	A	H	A	H	H	H	B	H	H	A	B	H	A	B	A	A	H	A	A	B	H	H	A	B	A	B	B	H	H	B	H	A	A	A	H	A	A	H	H	A	H	B	H	H	H	H	A
20403	A07	24777812	A	H	A	H	H	H	B	H	H	A	B	H	-	B	-	A	H	A	-	-	H	H	A	B	A	B	B	H	H	B	H	-	A	A	H	A	A	H	H	A	H	B	H	H	H	H	A
20404	A07	24777815	A	H	A	H	H	H	B	H	H	A	B	H	A	B	A	A	H	A	A	-	H	H	A	B	A	-	B	-	H	B	H	A	A	A	H	A	A	H	H	A	H	B	H	H	H	H	A
20406	A07	2478132	H	B	B	H	H	A	H	H	H	H	H	H	H	B	B	H	B	H	H	H	H	H	A	H	-	-	A	-	H	B	H	H	B	-	B	H	H	H	H	A	B	H	A	A	B	H	H
20415	A07	24824049	A	H	A	H	H	H	B	-	H	A	B	H	A	B	A	A	H	A	A	B	H	H	A	B	A	B	B	H	H	B	H	-	A	-	H	A	A	H	H	A	H	B	H	H	-	H	A
20426	A07	24970032	H	H	B	B	A	H	H	H	A	A	B	H	A	B	H	B	H	B	B	H	H	H	H	H	B	H	A	A	A	H	H	A	A	H	B	H	A	H	H	-	B	H	H	B	H	A	H
20468	A07	25227014	A	H	A	H	H	H	B	H	H	A	B	H	A	B	A	-	H	A	-	B	H	H	H	B	A	B	B	H	H	B	H	A	A	-	H	A	A	H	H	-	H	B	H	H	H	H	A
20469	A07	25227017	A	H	A	H	H	H	B	H	H	A	B	H	A	B	A	A	H	A	A	B	H	H	H	B	A	B	B	H	-	B	H	A	A	-	H	A	A	H	H	A	H	-	H	H	H	H	A
20471	A07	25233424	A	H	A	H	H	H	B	H	H	-	B	H	A	B	A	A	H	A	A	B	H	H	H	B	A	B	B	-	H	B	H	A	-	A	H	A	A	H	H	A	H	B	H	H	H	H	A
20484	A07	2527735	H	B	B	H	H	A	H	H	H	H	H	H	H	B	-	H	B	H	H	H	H	H	A	H	A	A	-	H	H	B	H	H	B	H	B	H	H	H	H	A	B	H	A	A	B	H	H
20485	A07	25291345	A	H	A	H	H	H	-	H	H	H	B	H	-	-	-	A	H	A	A	B	H	H	H	B	A	B	-	H	H	B	H	A	A	A	H	A	A	H	H	A	H	-	H	H	H	H	A
20486	A07	25291348	A	H	A	H	H	H	B	H	H	H	B	H	A	B	A	A	H	A	A	B	H	H	H	B	A	B	B	H	H	B	H	A	A	A	H	A	A	H	H	A	H	B	H	H	H	H	A
20488	A07	25325795	A	H	A	H	H	H	B	H	H	H	B	H	A	B	A	A	H	A	A	B	H	H	H	B	A	B	-	H	H	B	H	A	A	A	H	A	A	-	H	A	H	B	H	H	H	H	A
20489	A07	25331977	-	H	-	H	H	H	-	H	H	H	-	H	A	B	A	A	H	A	A	B	H	H	H	B	-	B	B	H	H	B	H	A	A	A	H	A	-	H	H	-	-	B	H	H	H	H	-
20495	A07	25342914	A	H	A	H	H	H	B	H	H	H	B	H	-	B	A	-	H	A	-	-	H	H	-	B	A	B	B	H	H	-	H	A	A	A	-	A	A	H	H	A	H	-	H	H	H	H	A
20499	A07	25363487	H	A	H	H	A	H	H	-	A	H	H	H	H	H	H	A	A	H	A	A	H	A	B	A	H	H	H	A	H	A	H	H	A	H	H	H	H	H	A	H	H	H	H	H	A	H	H
20531	A07	25543406	A	H	-	H	H	H	B	H	H	H	B	H	A	B	A	A	H	A	A	B	H	H	H	B	A	B	B	H	H	-	H	A	-	A	H	A	A	H	H	A	H	B	H	H	H	H	A
20532	A07	25545554	A	H	-	H	H	H	-	H	H	H	B	H	A	B	A	A	H	A	A	B	H	H	H	B	A	B	B	H	H	-	H	A	A	A	H	A	A	H	H	A	H	B	H	H	H	H	A
20535	A07	25565561	A	H	A	H	H	H	B	H	H	H	B	H	A	B	A	A	H	A	-	-	H	H	H	B	A	B	B	H	H	B	H	A	A	A	H	A	A	H	H	A	H	B	H	H	H	H	A
20539	A07	25593293	A	H	A	H	H	H	-	H	H	H	B	H	-	B	A	A	H	A	A	B	H	H	H	-	-	B	B	H	H	B	H	-	A	A	H	A	A	H	H	A	H	B	H	H	H	H	A
20540	A07	25593296	A	H	A	H	H	H	-	H	H	H	B	H	A	B	-	A	H	A	A	B	H	H	H	B	A	B	B	-	H	B	H	A	A	-	H	A	A	H	H	-	H	B	H	H	H	H	A
20559	A07	25691916	A	H	A	H	H	H	B	H	H	H	B	H	A	B	A	A	H	A	A	B	H	H	H	B	A	B	B	H	H	B	-	A	A	A	H	A	A	H	H	A	H	B	H	H	H	H	A
20578	A07	2572457	A	A	H	-	A	A	A	A	A	H	A	A	-	A	-	A	A	H	A	A	A	A	A	A	A	B	A	A	A	A	A	A	A	A	A	A	A	A	A	-	A	A	A	A	-	A	A
20587	A07	25749572	A	H	A	H	H	H	B	H	H	H	B	H	A	B	A	A	H	A	A	B	H	H	H	B	A	B	B	H	H	B	H	A	A	A	H	A	A	H	H	A	H	B	H	H	H	H	A
20589	A07	25780436	A	H	A	H	H	H	B	H	H	H	B	H	A	B	A	A	H	A	A	B	H	H	H	B	A	B	B	H	H	B	H	A	A	A	H	A	A	H	H	A	H	B	H	H	H	H	A
20617	A07	2611368	H	B	B	H	H	A	H	H	H	H	H	H	H	B	B	H	B	H	H	H	H	H	-	H	A	A	A	H	H	B	H	H	B	H	B	H	H	H	H	A	B	H	A	A	B	H	H
20632	A07	2684770	H	B	-	H	H	A	H	H	H	H	H	H	H	B	B	H	B	H	H	H	-	H	A	H	A	A	A	H	H	B	H	H	B	H	-	H	-	H	H	A	B	H	A	A	-	H	H
20633	A07	2686774	H	-	B	H	H	A	-	H	H	-	H	H	H	B	B	H	B	H	H	H	H	H	A	H	A	A	A	H	H	B	H	H	B	H	B	H	H	H	H	A	B	-	-	A	B	-	H
20635	A07	2690942	H	B	B	H	H	A	H	H	H	H	H	H	H	B	B	H	B	H	H	H	H	H	A	H	A	A	A	H	H	B	H	H	B	H	B	H	H	H	H	-	B	H	A	A	B	H	H
20636	A07	2691811	H	B	B	H	H	A	H	H	H	H	H	H	H	B	B	H	B	H	H	H	H	H	A	H	A	A	A	H	H	B	H	H	B	H	B	H	H	H	H	A	B	H	A	A	B	H	H
20641	A07	2719774	H	B	B	H	H	A	H	H	H	H	H	H	H	B	B	H	B	H	H	H	H	H	A	H	A	A	A	H	H	B	H	H	B	H	B	H	H	H	H	A	B	H	A	A	-	H	H
20644	A07	2728808	H	H	H	H	H	A	H	H	H	H	H	-	H	H	H	H	-	H	H	H	H	H	A	H	-	A	A	H	H	H	H	H	-	H	H	-	H	H	H	-	H	H	A	A	H	H	H
20655	A07	2806293	H	B	-	H	H	A	H	H	H	H	H	H	H	-	B	H	B	H	H	H	H	H	A	H	A	A	A	H	H	B	H	-	B	H	B	H	H	H	-	A	B	H	A	A	B	H	H
20663	A07	2855113	-	B	B	-	H	A	H	H	H	H	H	H	H	B	B	H	B	H	H	H	H	-	A	H	A	A	-	H	H	B	H	H	B	-	B	H	H	H	H	-	B	-	A	A	B	H	H
20664	A07	2855116	H	B	B	H	H	-	H	H	H	H	H	H	-	B	B	H	B	H	H	-	H	H	A	H	-	-	-	H	H	B	H	H	-	H	-	H	H	H	-	A	-	H	A	-	B	H	H
20693	A07	3090653	H	-	B	H	H	A	H	H	H	H	H	H	H	B	B	H	B	H	H	-	H	H	A	H	A	A	A	H	H	B	H	H	B	H	B	H	H	H	H	A	B	H	A	A	B	H	H
20709	A07	3189650	H	B	B	H	H	A	H	H	H	H	H	H	H	B	B	H	B	H	H	H	H	H	A	H	A	A	A	H	H	B	H	H	B	H	B	H	H	H	H	A	B	H	A	A	B	-	H
20742	A07	3384254	H	H	H	H	H	H	-	H	-	H	H	H	H	H	H	A	-	H	A	H	H	-	H	H	H	H	-	H	H	H	-	H	H	-	H	H	H	H	-	H	H	H	H	H	-	H	H
20745	A07	3408443	H	B	B	H	H	A	H	H	H	H	H	H	H	B	B	H	-	H	H	H	H	H	A	H	A	A	A	H	H	B	H	H	B	H	B	H	H	H	H	A	B	H	A	A	B	H	H
20757	A07	3574176	H	B	B	H	H	A	H	H	H	H	H	H	H	B	B	H	B	H	H	H	H	H	A	H	A	A	A	H	-	B	H	H	B	H	B	H	H	H	H	-	B	H	A	A	B	H	H
20760	A07	3585650	H	B	B	H	H	A	H	H	H	H	H	H	H	B	B	H	B	H	H	H	H	H	A	H	A	A	A	H	H	B	H	H	B	H	B	H	H	H	H	A	B	H	A	A	B	H	H
20785	A07	3707800	H	B	B	H	H	A	H	B	H	H	H	H	H	-	B	H	B	H	H	H	H	H	A	H	A	A	A	H	-	-	H	H	B	H	B	H	H	H	H	-	H	H	A	A	B	H	H
20831	A07	3918496	H	H	B	B	A	H	H	H	A	A	B	H	A	B	H	-	H	B	B	H	H	H	H	H	B	H	A	H	A	H	H	A	A	H	B	H	-	H	H	A	B	H	H	B	H	A	H
20837	A07	4022379	H	H	B	B	A	H	H	H	A	A	-	H	A	B	H	B	H	B	-	H	H	H	H	H	B	H	A	H	A	H	H	A	A	H	B	H	A	H	H	A	B	H	H	B	H	A	H
20909	A07	4242223	H	B	B	H	H	A	H	H	H	H	H	H	H	B	B	H	B	H	H	H	H	H	-	H	A	A	A	H	H	B	H	H	B	H	B	H	H	H	H	A	B	H	A	A	B	H	H
20928	A07	4447024	H	B	B	H	H	-	H	H	H	H	H	H	H	B	B	H	B	H	H	H	H	H	A	H	A	A	A	H	H	B	H	H	B	H	B	H	H	H	H	A	B	H	A	A	-	H	H
20937	A07	4491600	B	H	H	H	H	A	H	H	H	H	-	A	H	B	A	H	B	B	A	A	H	H	A	A	A	H	H	B	A	B	B	H	H	H	B	B	H	B	H	H	B	A	H	H	A	H	A
20951	A07	4509773	H	B	B	H	H	A	H	H	H	H	H	H	H	B	B	H	B	H	H	H	-	H	A	H	A	A	A	H	H	B	H	-	B	H	B	H	H	H	H	-	B	H	A	A	B	H	H
21002	A07	4766610	H	B	B	H	H	A	H	H	H	H	H	H	H	B	B	H	-	H	H	H	H	H	A	H	A	A	A	H	H	B	H	H	B	H	-	H	-	H	H	A	B	H	A	A	B	H	-
21010	A07	4827343	H	B	B	H	H	A	H	H	H	H	H	H	H	B	B	H	B	H	H	H	H	H	A	H	A	A	A	H	H	B	H	H	B	H	-	H	H	H	H	H	B	H	A	A	B	H	H
21014	A07	4841330	H	B	B	H	H	A	H	H	H	H	H	H	H	B	B	H	B	H	H	H	H	H	A	H	A	A	A	H	H	B	H	H	B	H	B	H	H	H	H	A	B	H	A	A	B	H	-
21026	A07	489963	H	B	H	H	H	A	B	-	H	H	H	H	H	-	B	H	B	B	H	B	H	H	A	H	A	A	A	H	H	H	-	H	-	H	B	H	H	H	H	A	H	H	A	A	B	H	H
21029	A07	4958918	H	B	B	H	H	A	H	H	H	H	H	H	H	B	B	H	B	H	H	H	H	H	A	H	A	A	-	H	H	B	H	H	B	H	B	H	H	H	H	A	B	H	A	A	B	H	H
21055	A07	5138380	H	-	B	H	H	A	H	H	H	H	H	H	H	B	B	H	B	H	H	H	H	H	A	H	A	A	A	H	H	B	H	H	B	H	B	H	H	H	H	A	B	H	A	A	B	H	H
21070	A07	5219211	H	B	-	H	H	A	H	H	H	H	H	H	H	B	B	H	B	H	H	-	H	H	A	H	A	A	A	H	H	-	H	H	B	H	B	H	H	H	H	A	-	H	A	A	B	H	H
21080	A07	5298378	H	B	B	H	H	A	H	H	H	H	H	H	H	B	B	H	B	H	H	H	H	H	A	H	A	A	A	H	H	B	H	H	B	H	B	H	H	H	H	A	B	H	A	A	B	H	H
21086	A07	5347496	H	B	B	H	H	A	H	H	H	H	H	H	H	B	B	H	-	H	H	H	H	H	A	H	-	-	A	H	H	-	H	H	-	H	B	H	H	H	H	A	-	H	A	A	-	H	H
21087	A07	5351436	H	B	B	H	H	A	H	H	H	H	H	H	H	B	B	H	B	H	H	H	H	H	A	H	A	A	A	H	H	B	H	H	B	H	B	H	H	H	H	A	B	H	A	A	B	H	H
21114	A07	5551598	H	B	-	H	H	A	H	H	H	H	H	H	H	-	-	H	-	H	H	H	H	H	A	H	-	A	-	H	H	B	H	H	B	H	B	H	H	H	H	-	B	H	A	A	-	-	H
21142	A07	5822077	A	H	-	A	A	A	A	A	H	A	A	A	A	H	A	A	H	A	A	A	A	A	-	A	A	A	A	A	-	A	A	A	H	A	A	A	A	A	A	A	H	A	A	A	A	A	H
21158	A07	6043218	H	B	B	H	H	H	H	H	H	H	H	H	H	B	B	H	B	H	H	H	H	H	A	H	A	A	A	H	H	B	H	H	B	H	B	H	H	H	H	-	B	H	A	A	B	H	H
21207	A07	6498807	H	B	B	H	H	H	H	H	H	H	H	H	H	-	B	H	B	H	H	H	H	H	A	H	A	A	A	H	H	B	H	H	B	H	H	A	H	-	H	A	B	H	A	A	B	H	H
21208	A07	6498810	H	B	B	H	H	H	H	H	H	H	H	H	-	B	B	H	B	H	H	H	H	H	-	H	A	-	A	H	H	B	H	H	B	H	H	A	H	H	H	A	B	H	A	A	B	H	H
21222	A07	6632406	H	B	B	H	H	H	-	H	H	H	H	H	H	B	B	H	B	H	H	H	H	H	-	H	A	A	-	H	H	-	H	H	H	H	H	-	H	-	H	A	B	H	A	A	B	H	-
21230	A07	6700179	H	-	B	H	-	H	H	H	-	H	H	H	H	B	B	H	-	H	-	H	H	H	A	H	A	A	A	H	H	B	-	-	H	H	H	A	H	H	H	-	B	H	-	A	B	H	H
21231	A07	6700608	H	B	B	-	H	H	H	H	H	H	H	H	H	B	B	H	B	H	H	H	H	H	A	H	A	A	A	H	H	B	H	H	H	H	H	A	H	H	H	A	B	H	A	A	B	H	H
21236	A07	6710545	H	-	B	H	H	H	H	H	H	H	H	H	H	B	-	H	-	H	H	H	H	H	A	H	A	A	A	H	H	B	H	-	H	H	H	A	H	H	H	-	B	H	-	A	-	H	H
21271	A07	7038629	-	B	-	H	H	H	H	H	H	H	H	H	H	B	B	H	-	H	H	H	H	H	-	H	A	A	-	H	H	B	H	H	H	H	-	A	H	H	H	A	B	H	A	A	B	H	H
21293	A07	7297575	H	B	B	H	H	H	H	H	H	H	H	H	H	B	B	H	B	H	H	H	H	H	A	H	A	A	A	H	H	B	H	H	H	H	H	A	H	H	H	A	B	H	A	A	B	H	H
21314	A07	7583322	H	B	B	H	H	H	H	H	H	H	H	H	H	B	B	H	B	H	H	H	H	H	A	H	A	A	A	H	H	B	H	H	H	H	H	A	H	H	H	A	-	H	A	A	B	H	H
21316	A07	7597365	H	B	B	H	H	H	H	H	H	H	H	H	H	B	B	H	B	H	H	H	H	H	A	H	A	A	A	H	H	B	H	H	H	H	H	A	H	H	H	A	B	H	A	A	B	H	H
21322	A07	7625231	H	B	B	H	H	H	H	H	H	H	H	H	H	B	B	H	B	H	H	H	H	H	A	H	A	A	-	H	H	B	H	H	H	H	H	A	H	H	H	A	B	H	-	-	B	H	H
21335	A07	7823562	H	H	-	H	H	H	-	H	H	-	-	H	-	H	H	H	H	H	H	H	H	H	H	-	H	H	H	H	H	H	H	H	H	H	H	-	-	H	H	H	-	H	H	H	H	H	H
21351	A07	7977165	H	H	H	B	B	B	B	H	A	B	B	B	H	-	B	A	H	B	B	A	H	B	A	H	H	H	B	A	H	B	H	H	B	A	A	B	A	A	H	B	H	B	A	H	B	H	B
21376	A07	8269734	H	B	B	H	H	H	H	H	H	B	H	A	H	B	B	H	A	A	B	A	A	A	B	H	B	B	A	A	A	H	B	B	B	H	A	A	H	H	A	H	H	A	H	H	B	H	H
21377	A07	8270568	H	B	B	H	-	-	H	H	H	B	H	A	H	B	B	H	A	A	B	-	A	A	-	H	B	B	A	A	A	H	B	B	B	H	A	A	H	H	A	H	H	A	H	H	B	H	H
21378	A07	8270571	H	B	-	H	H	H	H	H	H	B	-	A	H	B	B	H	A	A	B	A	A	A	B	H	B	B	A	A	A	H	B	B	B	H	A	A	H	H	A	H	H	A	H	H	B	H	H
21380	A07	8271303	H	B	B	-	H	H	H	H	H	B	H	A	H	B	B	H	A	A	B	A	A	A	B	H	B	B	A	A	A	H	B	B	B	-	A	A	H	H	A	H	H	-	H	H	B	H	H
21386	A07	8308591	H	B	H	H	H	H	H	H	H	H	H	H	-	B	B	H	B	H	H	H	H	H	A	H	A	A	A	H	H	B	H	H	H	H	H	A	H	H	H	A	-	H	A	A	B	H	H
21452	A07	9208191	H	B	H	H	H	H	H	H	H	H	H	H	H	B	B	H	B	H	H	H	H	H	A	H	A	-	A	H	H	B	H	H	H	H	H	A	H	H	H	A	B	H	A	A	B	H	H
21456	A07	9277846	H	B	H	H	H	H	H	H	H	H	H	H	H	B	B	H	H	H	H	H	H	H	-	H	A	A	H	H	H	B	H	H	H	H	H	A	H	H	H	-	B	H	A	A	-	H	H
21457	A07	9280049	H	B	H	H	H	H	H	H	H	H	H	H	H	B	B	H	H	H	H	H	H	H	A	H	A	A	H	H	H	B	H	H	H	H	H	A	H	H	H	A	B	H	-	-	B	H	H
21458	A07	9281764	H	B	H	H	H	H	H	H	H	H	H	H	H	B	-	H	H	H	H	H	H	H	A	H	A	A	H	H	H	B	H	H	H	-	H	A	H	H	H	A	-	H	A	A	B	H	H
21459	A07	9282180	H	B	H	H	H	H	H	H	H	H	H	H	H	B	B	H	H	H	H	H	H	H	A	H	A	A	H	H	H	B	H	H	H	H	H	A	H	H	H	A	B	H	A	A	B	H	H
21460	A07	9282183	H	B	H	H	H	H	H	H	H	H	H	H	H	B	B	H	H	H	H	H	H	H	A	H	A	A	H	H	H	B	H	H	H	H	H	A	H	H	H	A	B	H	A	A	B	H	H
21472	A07	9354025	H	B	H	H	H	H	H	H	H	A	H	H	H	B	B	H	H	H	H	H	H	H	A	H	A	A	H	H	H	-	H	H	H	H	H	A	H	H	H	A	B	H	A	A	B	H	H
21485	A07	9502320	H	B	H	H	H	H	-	-	H	H	H	H	H	B	B	H	H	-	A	H	-	-	A	H	A	A	H	H	H	B	H	H	H	H	H	A	H	H	H	A	B	H	A	A	B	H	H
21496	A07	9605543	H	B	H	H	H	H	H	H	H	H	H	H	H	B	B	H	H	H	A	H	H	H	A	H	A	A	H	H	H	B	H	H	H	H	H	A	H	H	H	-	-	H	H	A	B	H	H
21497	A07	9606907	H	B	H	H	H	H	H	H	H	H	H	H	H	B	B	H	H	H	A	H	H	H	A	H	A	A	H	H	H	B	H	H	H	H	H	A	H	H	H	A	B	H	H	A	B	H	H
21544	A08	10041222	H	H	H	H	H	H	H	H	H	H	H	H	H	H	H	H	H	H	H	H	-	H	H	H	H	H	H	H	H	H	H	H	H	H	H	H	H	H	H	H	H	H	H	H	H	H	H
21548	A08	1007652	H	H	A	B	B	A	B	H	H	H	H	H	H	H	H	B	H	H	H	A	H	A	B	A	A	A	B	-	H	H	B	H	H	H	H	B	B	B	H	H	B	H	B	H	H	H	B
21549	A08	1008551	H	H	A	B	B	A	B	H	H	H	H	H	H	H	H	-	H	H	H	A	H	A	B	A	A	A	B	A	H	H	B	H	H	H	H	B	B	B	H	H	B	H	B	H	H	H	B
21576	A08	10312951	H	H	H	B	H	-	B	H	A	H	B	H	H	H	H	H	H	B	H	A	H	A	B	A	A	A	B	A	H	H	B	H	A	A	H	H	H	H	A	H	H	H	B	H	B	B	B
21608	A08	10697141	H	H	H	-	H	A	B	H	A	H	-	H	H	H	H	H	H	-	H	A	H	A	-	A	A	-	-	-	H	H	-	H	-	A	H	H	H	H	A	H	H	H	B	H	B	B	-
21612	A08	10707281	H	H	H	B	H	A	B	H	A	H	B	H	H	H	H	H	H	B	H	A	H	A	B	A	A	A	B	A	H	H	B	H	A	A	H	H	H	H	A	H	H	H	B	H	B	B	B
21613	A08	10707284	H	H	H	B	H	A	B	H	A	H	B	H	H	H	H	H	-	B	H	A	H	A	B	A	A	A	B	A	H	H	B	H	A	A	H	H	H	H	A	H	H	H	B	H	B	B	B
21615	A08	10710154	H	H	H	B	H	-	B	H	-	H	B	H	H	H	H	-	H	B	H	A	H	A	B	A	-	-	B	-	H	H	B	H	-	A	-	H	H	H	A	H	H	H	B	H	B	B	B
21639	A08	10938115	H	H	H	B	H	A	B	H	-	H	B	H	H	H	H	H	H	B	H	A	H	A	B	A	A	A	B	A	H	H	B	H	A	A	H	H	H	H	A	H	H	H	B	H	B	B	B
21653	A08	11107192	H	H	H	B	H	A	B	H	A	H	B	H	H	H	H	H	H	B	H	A	H	A	B	A	-	A	B	A	H	H	B	H	A	A	H	H	H	H	-	H	H	H	B	H	B	B	B
21656	A08	11112668	H	H	H	B	H	A	B	H	A	H	B	H	H	H	H	H	H	B	H	A	H	A	B	A	A	A	B	-	H	H	B	H	A	A	H	H	H	H	A	H	H	H	B	H	B	B	B
21664	A08	11262977	B	A	B	B	H	H	H	H	A	H	B	B	H	H	H	A	A	-	H	A	H	A	B	A	H	H	H	A	A	A	B	H	A	B	H	H	H	H	H	H	H	H	-	H	A	H	H
21674	A08	1139230	H	H	A	B	B	A	B	H	H	H	H	H	H	H	H	B	H	H	H	A	H	A	B	A	A	A	B	A	H	H	B	H	H	H	H	B	B	H	H	H	B	H	B	H	H	H	B
21687	A08	1152054	H	H	A	-	B	A	-	H	H	H	H	H	H	H	H	B	H	H	-	-	H	-	B	A	A	A	B	A	H	H	-	H	H	H	H	B	-	H	H	H	B	H	B	H	H	H	B
21690	A08	1152666	H	H	A	B	B	A	B	H	-	H	H	H	H	H	H	B	H	H	H	A	H	A	B	A	A	A	B	A	H	H	B	H	H	H	H	B	B	H	H	H	B	H	B	H	H	H	B
21692	A08	11537450	H	H	H	B	H	A	-	H	A	H	B	H	H	H	H	H	H	B	H	A	H	A	B	A	A	-	B	A	H	H	-	H	A	A	H	H	H	H	A	H	H	H	B	H	B	B	B
21694	A08	115473	H	H	A	B	B	A	B	H	H	H	H	H	H	H	H	B	H	H	H	A	H	A	B	A	A	A	B	A	H	H	B	H	H	H	H	B	B	B	H	H	B	H	B	A	H	H	B
21712	A08	11727665	H	H	H	B	H	-	B	H	A	H	-	H	H	H	H	H	H	B	H	A	H	A	-	A	A	A	B	-	H	H	B	H	A	A	B	H	H	H	A	A	H	H	B	H	-	B	B
21730	A08	11850185	H	H	H	B	H	A	B	H	A	H	B	H	H	H	H	H	H	B	H	A	H	A	B	A	A	A	B	A	H	H	B	H	A	A	B	H	H	H	A	A	H	H	B	H	B	B	B
21732	A08	11854913	H	H	H	B	H	A	B	H	A	H	B	H	H	H	H	H	H	B	H	A	H	A	B	A	A	A	B	A	H	H	B	H	A	A	B	H	H	H	A	A	H	H	B	H	B	B	B
21747	A08	12078020	H	H	H	B	H	A	B	H	A	H	B	H	-	H	H	H	H	B	H	A	H	-	B	A	A	A	B	A	H	H	B	H	A	A	B	H	H	H	A	A	-	H	B	H	B	B	B
21750	A08	12079233	H	H	H	B	H	-	B	H	A	H	-	H	H	H	H	H	H	B	H	A	H	-	B	A	A	A	B	A	H	H	-	H	A	A	B	H	H	H	A	A	H	H	B	-	B	B	B
21751	A08	12080407	H	H	H	B	H	A	B	H	A	H	B	H	H	H	H	H	H	B	H	A	H	A	B	A	A	A	B	A	H	H	B	H	A	A	B	H	H	H	A	A	H	H	B	H	B	B	B
21822	A08	12692021	H	H	H	B	H	A	B	H	A	H	B	H	H	H	H	H	H	B	H	A	H	A	B	A	A	A	B	A	H	H	B	H	A	A	B	H	H	H	A	A	H	H	B	H	B	B	B
21838	A08	12905541	H	H	H	B	H	A	B	H	A	H	B	H	H	H	H	H	H	B	H	A	H	A	B	A	A	A	B	A	H	H	B	H	A	A	B	H	H	H	A	A	H	H	B	H	B	B	B
21842	A08	12927130	H	H	H	B	H	A	B	H	A	H	B	H	H	H	H	H	H	B	H	A	H	A	B	A	A	A	B	A	H	H	B	H	A	A	B	H	H	H	A	A	H	H	B	H	B	B	B
21843	A08	12934908	H	H	H	B	H	A	B	H	A	H	B	H	H	H	H	H	H	B	H	A	H	A	B	A	A	A	B	A	H	H	B	H	A	A	-	H	H	H	A	A	H	H	B	H	B	B	-
21845	A08	12935901	H	H	H	B	H	A	B	H	A	H	B	H	H	H	H	H	H	B	H	A	H	A	B	A	A	A	B	A	H	H	B	H	A	-	B	H	H	H	A	A	H	H	B	H	B	B	B
21858	A08	12997918	H	H	H	B	H	A	B	H	A	H	B	H	H	H	H	H	H	B	H	A	H	A	B	A	A	A	B	A	H	H	B	H	A	-	B	H	H	H	A	A	H	H	B	H	B	B	B
21867	A08	13037482	H	B	B	H	H	A	H	H	H	H	H	H	H	B	B	H	B	H	H	-	H	H	A	H	A	A	A	H	H	B	H	H	B	H	B	H	H	H	H	A	B	H	A	A	B	H	H
21882	A08	13186404	H	H	H	B	H	A	B	H	A	H	B	H	H	H	H	H	H	B	H	A	H	A	B	A	A	A	B	A	H	H	B	H	A	A	B	H	H	H	A	A	A	H	B	H	B	B	B
21896	A08	13286380	H	A	H	A	A	H	B	H	B	H	A	-	H	H	B	A	A	A	H	A	B	H	B	H	A	H	H	H	H	H	H	H	B	H	H	H	H	H	H	B	H	H	A	A	A	H	H
21913	A08	13437257	H	H	H	B	H	A	B	H	A	H	B	H	H	B	H	H	H	B	H	A	H	A	B	A	A	A	B	A	H	H	B	A	A	A	B	H	H	H	A	A	A	H	B	H	B	B	B
21953	A08	13674996	H	H	H	B	H	A	B	H	A	H	B	H	H	B	H	H	H	B	H	A	H	A	B	A	A	A	H	A	H	H	B	A	A	-	B	H	H	H	A	-	A	H	B	H	B	B	B
21954	A08	13674999	H	H	H	B	H	A	B	H	A	H	B	H	H	B	H	H	H	B	H	-	H	A	B	A	A	A	B	A	H	H	B	A	A	-	B	H	H	H	A	A	A	H	B	H	B	B	B
21962	A08	13698548	H	-	H	B	-	-	-	H	A	H	B	H	-	-	H	H	H	-	H	-	H	A	B	-	A	-	-	A	H	H	B	A	A	-	B	H	H	H	A	A	H	H	B	H	B	-	-
21966	A08	13744896	H	H	H	B	B	A	B	H	A	-	-	H	H	B	-	H	H	B	H	A	H	A	B	A	A	A	B	A	H	H	-	A	A	A	B	H	H	H	A	A	-	H	B	H	B	B	B
21982	A08	13840415	H	H	H	B	B	A	B	H	A	H	B	H	H	B	H	H	H	B	H	A	H	A	B	A	A	A	-	A	H	H	B	A	A	A	B	H	H	H	A	A	H	H	H	H	B	B	B
21989	A08	13939043	H	H	H	B	B	-	B	H	A	H	B	H	H	B	H	H	H	B	H	A	H	-	B	A	A	A	B	A	H	H	B	A	A	A	B	-	H	H	A	A	H	H	H	H	B	B	B
22039	A08	14347207	-	H	H	B	B	A	B	-	A	H	B	H	H	B	H	H	H	B	H	-	H	A	B	A	A	-	B	A	H	H	-	A	A	A	-	H	H	H	A	A	H	H	H	H	B	B	B
22045	A08	14389377	H	H	H	B	B	-	B	B	A	H	B	H	H	B	H	H	H	B	H	-	H	A	B	-	A	-	B	A	H	H	B	A	A	H	B	H	H	H	A	A	H	H	H	H	B	B	B
22067	A08	14542177	H	H	H	B	B	A	B	B	A	H	B	H	H	B	H	H	H	B	H	A	H	A	B	A	A	A	B	A	H	H	-	A	A	A	B	H	H	H	A	A	H	H	H	H	B	B	-
22087	A08	14725728	H	H	H	B	B	A	B	B	A	H	B	H	H	B	H	H	H	B	H	A	H	A	B	A	A	A	B	A	H	H	B	A	A	A	B	A	H	H	A	H	H	H	H	H	B	B	B
22088	A08	14729059	H	H	H	-	-	A	B	-	A	H	B	H	H	-	H	H	H	B	H	A	H	A	B	A	A	A	B	A	H	H	-	A	A	-	B	A	H	H	A	A	H	H	H	H	B	B	-
22089	A08	14729062	H	H	H	B	-	A	B	B	A	H	B	H	H	B	-	H	H	B	H	-	H	A	-	-	A	A	-	A	H	H	-	A	A	A	B	A	H	H	A	-	H	H	H	H	B	H	-
22095	A08	14821969	H	H	H	B	B	A	B	B	A	H	B	H	H	B	H	H	H	B	-	A	H	A	B	A	A	A	B	A	H	-	-	-	A	A	B	A	H	H	A	A	H	H	H	H	B	B	B
22125	A08	15011826	H	H	-	B	B	A	B	B	A	H	B	H	H	-	H	H	H	-	H	-	-	A	B	A	A	A	-	A	-	H	-	A	A	A	-	-	H	H	A	A	H	H	H	H	B	B	B
22130	A08	1505354	H	H	H	H	-	B	B	A	H	B	A	H	-	H	-	H	H	H	B	A	H	A	H	H	A	H	A	H	H	H	A	A	A	A	H	A	B	H	B	H	-	H	H	-	-	-	B
22140	A08	15117853	H	H	H	B	B	A	B	B	A	H	B	H	H	B	H	H	H	B	H	A	H	-	B	A	A	A	B	A	H	H	B	A	A	A	-	A	H	H	A	A	H	H	H	H	B	B	B
22160	A08	15279918	H	H	H	B	B	A	B	-	A	H	B	H	H	B	H	H	H	B	H	A	H	-	B	H	A	A	B	A	H	H	B	A	A	A	B	A	H	H	-	-	H	H	H	H	-	B	-
22168	A08	15338652	H	H	H	B	B	A	B	B	-	H	B	H	H	B	H	H	H	B	H	-	H	A	B	H	A	A	B	H	H	H	-	A	A	-	B	A	H	H	A	A	H	H	H	H	B	B	B
22171	A08	15386402	H	H	H	B	B	A	B	-	A	H	B	H	H	B	H	H	H	-	H	A	H	A	B	H	A	A	B	A	H	H	B	A	A	A	-	A	H	H	A	A	H	H	A	H	B	-	B
22205	A08	15545386	H	H	H	B	B	A	B	-	A	H	B	H	H	B	H	H	H	B	H	A	H	A	B	H	A	A	B	A	H	H	B	A	A	A	B	A	H	H	A	A	H	H	A	H	B	B	B
22207	A08	15552749	H	H	H	B	B	-	-	B	A	H	-	H	H	-	H	H	H	B	H	A	H	A	-	H	A	-	B	A	H	H	B	-	-	-	-	A	-	H	-	-	H	H	A	H	B	-	-
22210	A08	15563609	H	H	H	B	B	-	B	B	A	H	B	H	H	B	H	H	H	B	H	A	H	A	B	H	A	-	-	A	H	H	B	A	A	A	B	A	A	H	A	A	H	H	A	H	B	-	B
22213	A08	15568432	H	H	H	B	B	A	B	B	A	H	B	H	H	B	H	H	H	B	H	-	H	A	B	H	A	A	B	A	H	H	B	A	A	A	B	A	A	H	A	-	H	H	A	H	B	B	B
22240	A08	15796833	H	H	H	B	B	A	B	B	A	H	B	H	-	B	-	H	H	B	H	A	H	A	B	H	-	A	-	A	H	H	B	A	A	-	-	A	A	H	A	A	H	H	A	H	B	-	B
22244	A08	15829085	H	H	H	B	-	A	B	B	A	H	B	H	H	B	H	H	H	B	H	A	H	A	B	H	A	A	B	A	H	-	B	A	A	A	B	A	A	H	A	A	H	H	A	H	B	B	B
22246	A08	1583503	H	H	H	H	H	B	B	A	H	-	A	H	-	H	A	H	H	H	-	A	H	A	H	H	A	H	A	H	H	H	A	A	A	A	H	A	B	H	B	H	-	H	H	A	A	B	B
22265	A08	15923201	H	H	H	B	B	A	B	-	A	H	B	H	H	B	H	H	H	-	H	A	H	A	B	H	A	A	-	-	H	H	B	A	A	A	-	A	A	H	A	A	-	H	A	H	-	B	B
22312	A08	16312907	H	H	H	B	B	A	B	B	A	H	B	H	H	B	H	H	H	B	H	A	H	-	B	H	A	A	B	A	H	H	B	A	A	A	B	A	A	H	A	A	B	H	A	H	B	-	B
22333	A08	16429045	H	H	H	B	B	A	B	B	A	H	B	H	H	B	H	H	H	B	H	A	H	-	B	H	A	A	B	A	H	H	B	A	A	A	B	A	A	H	A	A	-	H	A	H	B	H	B
22341	A08	16468949	H	H	H	-	B	A	B	B	A	H	B	H	H	B	H	H	H	B	H	A	H	A	B	H	A	A	B	-	H	H	B	A	A	A	B	A	-	H	A	A	B	H	A	H	B	H	B
22344	A08	16508210	H	H	H	B	B	A	B	B	A	H	B	H	H	B	H	H	H	B	H	A	H	A	-	H	A	-	B	A	H	H	-	A	-	A	-	A	A	H	A	A	B	H	A	H	B	H	-
22345	A08	16508608	H	H	H	B	B	A	B	B	A	H	B	H	H	B	H	H	H	B	H	A	H	A	B	H	A	A	B	A	H	H	B	A	A	A	B	A	A	H	A	A	B	H	A	H	B	H	B
22347	A08	16509172	H	H	H	B	B	A	B	B	A	H	-	H	H	B	H	H	H	B	H	A	H	A	B	H	A	A	B	A	H	H	B	A	A	A	B	A	A	H	A	A	-	H	A	H	B	H	B
22384	A08	16720635	H	H	H	B	B	A	-	B	A	H	B	H	H	B	H	H	H	B	H	A	H	A	B	H	A	A	B	-	H	H	B	A	A	-	B	A	A	H	A	A	B	H	A	H	B	H	B
22398	A08	16953968	H	H	H	H	H	H	H	H	H	H	H	H	H	H	H	H	H	H	H	H	H	H	H	H	H	H	H	-	H	H	H	H	H	H	H	H	H	H	H	H	H	H	H	H	H	H	H
22414	A08	17047030	H	H	H	B	B	A	B	B	A	H	B	A	H	-	H	H	H	B	H	A	H	A	B	H	A	A	H	H	H	H	B	A	A	A	B	A	A	H	A	A	B	H	A	H	B	H	B
22421	A08	17075023	H	H	H	B	B	-	B	B	H	H	B	A	H	B	H	H	H	B	H	A	H	A	B	H	A	A	H	H	H	H	B	A	A	A	B	A	A	H	A	A	B	H	A	H	B	H	B
22427	A08	17133397	H	H	H	B	B	A	B	B	-	H	B	A	H	B	H	H	H	B	H	A	H	A	B	H	A	A	H	H	H	H	B	A	-	A	-	-	-	H	A	-	B	H	A	H	B	H	B
22429	A08	17133757	H	H	H	B	B	A	B	-	-	H	B	A	H	-	H	H	H	-	H	A	H	A	-	H	-	A	H	H	H	H	B	-	A	A	B	A	A	H	-	-	-	H	A	H	B	H	B
22433	A08	17137449	H	H	H	B	-	A	B	B	-	H	-	-	H	B	H	H	H	-	H	-	H	A	-	H	A	A	H	H	H	H	-	A	A	A	B	-	-	H	A	A	-	H	A	H	-	H	-
22434	A08	17137989	H	H	H	B	-	A	B	B	A	H	B	A	H	B	H	H	H	B	H	A	H	A	B	H	A	A	H	H	H	H	B	A	A	A	B	A	A	H	A	A	B	H	A	H	B	H	B
22502	A08	17777418	H	H	H	B	B	A	H	-	A	H	B	A	H	B	H	H	H	-	H	A	H	-	B	H	A	A	H	H	H	H	B	A	A	H	B	-	A	H	A	-	B	H	A	H	B	A	B
22504	A08	17785904	H	H	H	B	-	A	H	B	A	H	B	A	H	B	H	H	H	B	H	A	H	H	B	H	A	A	H	H	H	H	B	A	A	H	B	A	A	H	A	A	B	H	A	H	B	A	B
22515	A08	17855216	H	H	H	B	B	A	H	B	A	H	B	-	H	B	H	H	H	-	H	-	H	H	B	H	A	-	H	H	H	H	B	A	-	H	B	A	A	H	A	A	B	H	-	H	B	A	B
22531	A08	17931531	H	H	H	B	B	A	H	-	-	H	B	A	H	B	H	H	H	-	H	-	H	H	B	H	-	-	H	H	A	H	-	-	-	H	-	A	H	H	-	-	B	H	-	H	-	-	-
22536	A08	17983338	H	H	H	B	B	A	H	-	-	H	B	-	H	B	H	H	H	B	H	A	H	H	-	H	A	A	H	H	-	H	H	A	A	H	B	A	H	H	A	A	B	H	A	H	B	A	B
22551	A08	18078354	H	-	H	B	B	A	H	B	A	H	B	-	H	-	H	H	H	B	H	A	H	H	B	-	A	A	H	H	A	H	H	-	-	H	-	A	H	-	A	A	-	H	A	H	-	A	B
22565	A08	18124083	H	H	H	B	B	A	H	B	-	H	B	-	H	B	H	H	H	-	H	A	H	H	B	H	A	A	H	H	A	-	H	A	A	B	-	A	H	H	A	A	-	H	A	H	B	A	B
22566	A08	18124086	H	H	H	B	B	-	H	B	A	H	B	A	H	B	H	H	H	B	H	A	H	H	B	H	A	-	H	H	A	H	H	A	-	-	B	A	H	H	A	A	B	-	A	H	B	A	B
22614	A08	18407146	B	H	H	-	B	-	H	-	A	H	B	A	H	-	H	H	B	-	H	A	H	H	-	B	-	A	H	H	A	H	H	A	A	B	B	A	H	H	A	A	B	H	-	H	B	A	-
22632	A08	1849653	H	H	A	-	B	-	-	H	H	H	H	H	H	H	H	-	H	H	H	A	H	A	-	A	A	-	B	-	H	H	-	-	H	H	H	-	B	H	H	H	-	-	B	H	H	-	-
22641	A08	18509994	H	H	H	H	H	H	H	H	H	H	H	H	H	H	H	H	H	H	H	H	H	H	-	H	H	H	H	H	H	H	H	H	H	H	H	H	H	H	H	H	H	H	H	H	H	H	H
22649	A08	18582515	B	H	H	B	B	-	H	-	A	H	B	A	H	B	H	H	B	B	H	A	H	H	B	B	A	A	H	H	A	H	H	A	A	B	B	A	H	H	A	A	B	H	A	H	B	A	B
22651	A08	18589793	B	H	-	B	B	-	H	B	A	H	B	A	H	B	H	H	B	B	H	A	H	H	B	B	-	A	H	H	A	H	H	-	A	B	B	A	H	H	A	-	B	H	A	H	B	A	B
22677	A08	18688519	B	H	H	B	B	A	H	B	A	H	B	A	A	B	H	H	B	B	H	A	H	H	B	B	A	-	H	H	A	H	H	A	A	B	B	A	H	B	A	A	B	H	A	H	B	A	B
22678	A08	18689348	B	H	H	B	B	A	H	B	A	H	B	A	A	B	H	H	B	B	H	A	H	H	B	B	A	A	H	H	A	H	H	A	A	B	B	A	H	B	A	A	B	H	A	H	B	A	B
22682	A08	18706549	B	H	H	B	B	A	H	B	A	H	B	A	A	B	H	H	B	B	H	A	H	H	B	B	A	A	H	H	A	H	H	A	A	B	B	A	H	B	A	A	B	H	A	H	B	A	-
22684	A08	18720294	B	H	H	B	B	A	H	B	A	H	B	A	-	B	H	H	B	B	H	A	H	H	B	B	-	A	H	H	A	H	H	A	A	-	B	A	H	B	A	A	B	H	-	H	-	A	B
22685	A08	18722572	B	H	H	B	B	-	H	B	A	-	B	A	A	B	H	H	B	B	H	A	H	H	B	B	A	A	H	H	A	H	H	-	A	B	B	-	H	B	A	A	B	H	A	H	B	-	B
22686	A08	18722575	B	H	H	B	B	A	H	-	-	H	-	A	-	B	H	H	B	-	H	A	H	H	-	B	A	A	H	H	A	H	H	A	A	B	-	A	H	-	A	A	B	H	A	H	B	-	-
22687	A08	18730228	B	H	H	B	B	A	H	B	A	H	B	A	A	B	H	H	B	B	H	A	H	H	B	B	A	A	H	H	A	H	H	A	A	B	B	A	H	B	A	A	B	H	A	H	B	A	B
22689	A08	18735426	B	H	H	B	B	-	H	B	A	H	B	A	A	B	H	H	B	B	H	-	H	H	B	B	-	A	H	H	A	H	H	A	A	B	B	A	H	B	A	A	B	H	A	H	B	A	B
22696	A08	18762263	B	-	H	B	-	-	-	-	-	H	B	-	A	-	H	H	B	B	H	-	H	H	-	-	-	A	-	H	-	H	-	A	A	-	B	-	H	B	A	-	-	H	-	H	-	A	-
22698	A08	18764250	B	H	H	B	B	A	H	B	A	H	B	A	A	-	H	H	B	-	H	A	H	H	B	B	A	A	H	H	A	H	H	-	-	-	B	A	H	B	A	A	B	H	-	H	-	A	-
22702	A08	18768302	B	H	H	-	B	A	H	B	A	H	B	A	A	B	H	-	B	B	H	A	H	H	B	B	-	A	-	H	A	H	H	A	A	B	B	-	H	-	A	-	B	H	A	H	B	-	B
22713	A08	18798011	-	B	H	B	-	-	H	B	A	H	-	A	A	B	H	H	B	B	H	A	H	H	B	B	A	A	H	H	A	H	H	A	A	B	B	A	H	B	A	A	B	H	A	H	B	A	B
22717	A08	1882530	H	H	A	B	B	A	B	H	H	H	H	H	H	H	H	B	H	H	H	A	H	A	B	A	A	A	B	A	H	H	B	H	H	H	H	B	-	H	H	H	B	H	B	H	H	H	B
22725	A08	18846554	B	H	H	-	B	A	H	-	-	H	-	-	-	B	H	H	-	B	H	H	H	H	B	B	-	-	H	H	-	H	H	-	-	B	B	A	H	-	-	A	-	H	-	H	-	A	-
22792	A08	19280277	B	H	H	B	B	A	H	B	A	H	-	A	A	B	H	H	B	B	H	H	H	H	B	-	A	A	H	H	A	H	H	A	H	B	B	A	H	B	A	A	B	H	A	H	B	A	B
22795	A08	19294926	B	H	H	B	B	A	H	B	A	H	H	A	A	B	H	H	B	B	H	H	H	H	B	B	A	A	H	H	A	H	H	A	H	B	B	A	H	B	A	A	B	H	A	H	B	A	B
22798	A08	19310433	B	H	H	B	B	A	H	B	A	H	H	A	A	B	H	H	B	B	H	H	H	H	B	B	A	A	H	H	A	H	H	A	H	B	B	A	H	B	A	A	B	H	A	H	B	A	B
22801	A08	19330791	B	H	H	B	B	A	H	B	A	H	-	A	A	B	H	H	B	B	H	H	H	H	B	B	A	A	H	B	-	H	H	A	H	B	B	-	H	B	A	-	B	H	A	H	B	A	B
22837	A08	19577163	B	H	H	B	B	H	H	B	A	H	H	A	A	-	H	H	B	B	H	H	H	H	B	B	A	A	H	B	A	H	H	A	H	B	B	A	H	B	A	A	B	H	A	H	B	A	B
22845	A08	19639243	B	H	-	B	B	H	H	H	A	-	H	A	A	B	H	H	B	B	H	H	H	B	B	B	A	A	H	B	A	H	H	A	H	B	B	A	H	B	A	A	B	H	A	H	B	A	-
22846	A08	19641002	B	H	H	B	B	H	H	B	A	H	H	A	A	B	H	H	B	B	H	H	H	B	B	B	A	A	H	B	A	H	H	A	H	B	B	A	H	B	A	A	B	H	A	H	B	A	B
22847	A08	19641005	B	H	H	B	-	H	H	B	A	H	H	A	A	B	H	H	B	B	H	H	H	B	B	B	A	A	A	B	A	H	H	A	H	B	B	A	H	B	A	A	-	H	A	H	B	A	H
22871	A08	19758557	B	H	H	B	B	H	H	B	A	H	H	A	A	B	H	H	B	B	H	H	H	B	B	B	A	A	H	B	A	H	H	A	H	B	B	A	H	B	A	-	B	H	A	H	B	A	B
22872	A08	19758560	B	H	H	B	B	H	H	B	A	H	H	A	A	B	H	H	B	B	H	H	H	B	B	B	A	A	H	B	A	H	H	A	H	B	B	A	H	B	A	-	B	H	A	H	B	-	B
22885	A08	19814532	-	H	H	B	B	H	H	B	A	H	H	A	A	B	H	H	-	-	H	H	H	B	-	B	A	-	H	B	A	H	H	A	H	B	-	A	H	B	A	-	B	H	A	H	B	A	-
22892	A08	19881874	-	H	H	-	-	H	H	-	A	H	H	A	-	H	H	H	B	B	H	-	H	-	-	B	A	A	H	B	-	H	H	A	H	-	-	-	H	-	A	A	B	B	A	H	B	-	B
22894	A08	19903225	B	H	H	B	B	H	H	B	A	H	H	A	-	H	H	H	B	B	H	H	H	B	B	B	A	A	H	B	-	H	H	-	H	-	B	A	H	B	A	-	B	B	A	H	B	A	B
22923	A08	20131669	B	H	H	B	B	H	-	-	-	H	H	A	-	H	H	H	B	H	H	H	H	-	B	B	A	H	H	B	A	H	H	H	H	B	B	A	H	B	A	A	B	B	A	H	B	A	B
22933	A08	20173987	B	H	H	B	B	H	H	-	A	H	H	A	A	H	H	H	B	H	H	H	H	B	B	B	A	H	H	B	A	H	H	H	H	B	B	A	H	B	A	A	B	B	A	H	B	A	B
22937	A08	2019534	H	H	A	B	B	A	B	H	H	H	H	H	H	H	H	B	H	H	H	A	H	A	B	A	A	A	B	A	H	H	B	H	H	H	H	B	B	H	H	H	B	H	B	H	H	H	B
22941	A08	20198398	B	-	H	B	B	H	H	-	A	-	H	-	-	H	H	-	B	H	H	H	H	B	B	-	-	H	H	-	-	H	H	H	H	B	-	A	H	-	A	-	B	-	-	H	B	A	B
22943	A08	20198619	-	H	H	B	B	H	H	B	A	H	H	A	-	-	H	-	B	H	H	H	H	B	-	B	A	H	H	B	A	H	H	H	H	B	B	A	H	B	A	A	B	B	A	H	B	A	B
22944	A08	20198622	B	H	H	B	B	H	H	-	A	H	H	A	A	H	H	-	B	H	-	H	H	B	B	B	A	H	H	-	A	H	H	H	H	B	-	A	H	-	A	A	-	B	A	H	B	A	-
22961	A08	2027518	H	H	A	-	B	A	B	H	H	H	H	H	H	H	H	B	H	H	H	A	H	A	B	A	A	A	B	-	H	H	B	H	H	H	H	B	B	H	H	H	B	H	B	H	B	H	B
22967	A08	20311326	B	H	H	B	B	-	H	-	-	B	H	A	A	H	H	-	-	H	H	H	H	B	B	B	A	H	H	B	-	H	H	H	H	B	B	A	-	B	A	A	-	B	A	H	B	A	B
22968	A08	20313054	B	H	H	B	B	H	H	B	A	B	H	A	A	H	H	A	B	H	H	H	H	B	B	B	A	H	H	B	A	H	H	H	H	B	B	A	H	B	A	A	B	B	A	H	B	A	B
22998	A08	20562731	B	H	H	B	B	H	H	-	A	B	-	A	-	H	H	A	B	H	H	H	H	B	B	B	A	H	H	B	A	H	H	H	H	B	B	A	-	B	-	A	B	B	A	H	B	A	B
23011	A08	20578917	B	H	H	B	B	H	H	B	A	B	H	A	A	H	H	A	B	H	H	H	H	B	B	B	A	H	H	B	A	H	H	H	H	B	B	A	H	B	A	-	B	B	A	H	-	A	B
23024	A08	20664112	B	H	H	B	B	H	H	B	A	B	H	A	A	H	H	A	B	H	H	H	H	B	B	B	A	H	H	-	A	H	H	H	H	B	B	A	H	B	A	A	B	B	A	H	B	A	B
23032	A08	20679564	H	H	H	B	B	H	H	B	A	B	H	A	A	H	H	A	B	H	H	H	H	B	B	B	A	H	H	B	A	H	H	H	H	B	B	A	H	B	A	A	B	B	A	H	B	A	B
23033	A08	2068809	H	H	A	B	B	A	B	H	H	H	H	H	H	H	H	B	H	H	H	A	-	A	B	A	A	A	-	A	H	H	B	H	H	H	H	B	B	H	H	H	B	H	B	H	H	H	B
23053	A08	2093133	H	B	-	B	B	A	B	-	H	H	H	H	H	H	B	B	H	H	H	A	H	A	B	A	A	A	B	A	B	H	B	H	H	H	H	B	B	B	H	H	B	H	B	H	H	-	B
23062	A08	2130021	H	H	H	H	H	-	H	H	H	H	H	H	H	H	H	H	H	H	H	H	H	H	H	H	H	H	H	H	H	H	H	H	H	H	H	H	H	H	H	H	H	H	H	H	H	H	H
23077	A08	2258145	H	H	H	H	H	H	-	H	H	H	H	H	H	-	H	H	H	A	H	H	H	A	-	H	-	H	H	H	H	H	H	H	H	H	-	A	H	H	H	H	-	H	H	H	H	H	-
23092	A08	2376640	H	H	A	B	B	A	B	H	H	H	H	H	H	H	H	B	H	H	H	A	H	A	B	A	A	A	B	A	H	H	B	H	H	H	H	B	-	H	H	H	B	H	B	H	H	B	B
23098	A08	241645	H	H	A	B	B	A	B	H	H	H	H	H	H	H	H	B	H	H	H	A	H	A	B	A	A	A	B	A	H	H	B	H	H	H	-	B	B	B	H	H	B	H	B	A	H	H	B
23122	A08	2839373	H	H	A	B	B	A	-	H	H	-	H	H	H	H	H	B	H	H	H	A	H	A	-	A	A	A	B	A	H	H	B	-	H	H	H	H	B	H	H	H	B	H	-	H	H	B	B
23130	A08	292285	H	-	A	B	B	A	B	H	H	H	H	H	H	H	H	B	H	H	H	A	H	A	B	A	A	A	B	A	H	H	B	H	H	H	H	B	B	B	H	H	B	H	B	A	H	H	B
23134	A08	294728	H	H	A	B	B	A	B	H	H	H	H	H	H	H	H	B	H	H	H	A	H	-	-	A	A	-	B	A	H	H	B	H	H	H	H	B	B	B	H	H	-	H	B	-	H	H	B
23156	A08	3131740	H	H	H	H	H	H	H	H	A	H	H	H	H	A	H	A	H	H	H	A	H	H	H	H	H	H	H	A	H	H	H	H	-	A	A	H	A	H	H	H	H	H	A	H	H	H	H
23161	A08	318195	H	H	A	B	B	A	B	H	H	H	H	H	H	H	H	B	H	H	H	A	H	A	B	A	A	A	B	-	H	H	B	H	H	H	H	B	B	B	H	H	B	H	B	A	H	H	B
23179	A08	3333336	H	H	H	H	H	H	H	H	H	H	H	H	H	H	H	H	H	H	H	H	H	H	H	H	H	H	H	H	H	H	H	H	H	H	H	H	H	H	H	H	H	H	H	H	H	H	H
23198	A08	347095	H	H	A	B	B	A	B	H	H	H	H	H	H	H	H	B	H	H	H	A	H	A	-	A	A	A	B	A	H	H	B	H	H	H	H	B	B	B	H	H	B	H	B	H	H	H	B
23218	A08	3615935	H	H	A	B	B	A	B	H	H	H	H	H	H	H	H	B	H	H	-	A	H	A	B	A	A	A	B	A	H	H	B	H	H	H	H	H	B	H	H	H	B	H	B	H	H	B	B
23225	A08	3621640	H	H	A	B	B	H	B	H	H	H	H	H	H	H	H	B	H	H	H	A	H	A	B	A	A	A	B	A	H	H	B	H	H	H	H	H	B	H	H	H	B	H	B	H	H	B	B
23226	A08	3621643	H	H	A	B	B	A	B	H	H	H	H	H	H	H	H	B	H	H	H	A	H	-	B	A	A	A	B	A	H	H	B	H	H	H	H	H	-	H	H	H	B	H	B	H	H	B	B
23228	A08	3633487	H	H	A	B	B	A	B	H	H	H	H	H	H	H	H	B	H	H	H	A	H	A	B	A	A	A	B	A	H	H	B	H	H	H	H	H	B	H	H	H	B	H	B	H	H	B	B
23233	A08	3703790	H	H	H	H	H	H	H	H	H	H	H	H	H	H	H	H	H	H	H	H	H	H	H	H	H	H	H	H	-	H	H	H	H	H	H	H	H	H	H	H	H	H	-	H	H	H	H
23256	A08	3824988	H	H	A	B	B	A	B	H	H	H	H	H	H	H	H	-	H	H	H	A	H	A	B	A	A	A	B	A	H	H	B	H	H	H	H	H	B	H	H	H	B	H	B	H	H	B	B
23262	A08	3883545	H	H	B	B	A	H	H	H	A	A	B	H	A	B	H	B	H	B	B	H	H	H	-	H	-	H	A	H	A	H	H	A	A	H	B	H	A	H	H	A	B	H	H	B	H	A	H
23270	A08	403296	H	H	A	-	-	A	B	H	-	H	H	H	H	H	H	B	H	H	H	-	H	-	-	A	A	A	B	A	H	H	-	H	H	H	H	B	B	B	H	H	B	H	B	H	H	H	-
23282	A08	4186777	H	H	A	B	B	-	B	H	H	H	H	H	H	H	H	B	H	H	H	A	H	A	B	A	A	A	-	A	H	H	B	H	H	H	H	H	B	H	H	H	B	H	B	H	H	B	B
23289	A08	4276922	H	H	A	B	B	A	B	H	H	H	H	H	H	H	H	B	H	H	H	A	H	A	B	A	A	-	B	A	H	H	B	H	H	H	H	H	B	H	H	H	B	H	B	H	H	B	B
23291	A08	4277728	H	H	A	B	B	A	B	H	H	H	H	H	H	H	H	B	H	H	H	A	H	A	B	A	A	A	B	A	H	H	B	H	H	H	H	H	B	H	H	H	B	H	B	H	H	B	B
23293	A08	4299096	H	H	A	B	B	A	B	H	H	H	H	H	H	H	H	B	H	H	H	-	H	A	B	-	A	-	B	A	H	H	B	H	H	H	H	H	B	H	H	H	B	H	B	H	H	B	B
23296	A08	430827	H	H	A	-	B	-	B	H	H	H	H	H	H	H	H	-	H	H	H	A	-	A	-	-	A	A	B	-	-	H	B	H	H	H	H	-	B	B	H	H	B	H	B	H	H	H	B
23312	A08	4356772	H	H	A	B	B	A	B	H	H	H	H	H	H	H	H	B	H	H	H	A	H	A	B	A	A	A	B	A	-	H	B	H	H	H	H	H	B	H	H	H	B	H	B	H	H	B	B
23370	A08	4907584	H	-	A	B	A	H	B	A	H	-	B	A	H	B	A	A	H	B	B	B	-	-	H	H	B	H	A	A	-	H	B	H	A	H	B	H	H	A	H	H	H	A	B	-	H	A	-
23373	A08	4952884	H	H	A	B	A	H	B	A	H	A	B	A	H	B	A	A	H	B	B	-	H	-	H	H	-	H	-	A	A	H	B	H	A	A	B	H	H	A	-	H	H	A	B	B	H	-	B
23411	A08	51226	H	H	A	B	B	A	B	H	H	H	H	H	H	H	H	B	H	H	H	A	H	A	B	A	A	A	B	A	H	H	B	H	H	H	H	B	B	B	H	H	B	H	B	A	H	H	B
23479	A08	5567215	A	H	-	H	H	H	H	A	H	H	H	H	H	A	A	H	H	A	-	-	H	H	-	H	A	H	H	H	H	H	A	H	H	A	H	-	A	A	H	A	H	H	H	H	H	H	H
23535	A08	6011463	H	H	A	B	B	A	B	H	H	H	H	H	H	H	H	B	H	H	H	-	H	A	B	A	A	A	B	A	H	H	B	H	A	H	H	H	B	H	H	H	B	H	B	H	H	B	B
23537	A08	6039338	H	H	A	B	B	A	B	H	H	H	H	H	H	H	H	B	H	H	H	A	H	A	B	A	A	A	B	A	H	H	B	H	A	H	H	H	B	H	H	H	B	H	B	H	H	B	B
23539	A08	6053406	H	H	A	B	B	A	B	H	H	H	H	H	H	H	H	B	H	H	H	A	H	A	B	A	A	A	B	A	H	H	B	H	A	H	H	H	B	H	H	H	B	H	B	H	H	B	B
23586	A08	6325116	H	H	A	B	H	A	B	H	H	H	H	H	H	H	H	B	H	B	H	A	H	A	B	A	A	A	B	A	H	H	B	H	A	H	H	H	B	H	H	H	B	H	B	H	H	B	B
23588	A08	6360762	H	H	A	-	H	A	B	H	H	H	H	H	H	H	H	B	H	B	H	A	H	A	B	A	A	A	B	A	H	-	B	H	A	H	H	H	B	H	H	H	B	H	B	H	H	B	B
23590	A08	6400734	H	H	A	B	H	A	B	H	H	H	H	H	H	H	H	B	H	B	H	A	H	A	B	A	A	A	B	A	H	H	B	H	A	H	H	H	B	H	H	H	B	H	B	H	H	B	B
23613	A08	6703856	H	H	A	-	H	A	B	H	A	H	H	H	H	H	-	B	H	B	H	-	-	A	B	-	A	A	-	A	H	H	B	H	A	H	H	H	B	H	-	H	H	H	B	H	H	B	B
23617	A08	6756939	H	H	A	B	H	A	B	H	A	H	H	H	H	H	H	B	H	B	H	A	H	A	B	A	A	A	B	A	H	H	B	H	A	H	H	H	B	H	H	H	H	H	B	H	H	B	B
23618	A08	6767080	H	H	H	-	H	A	B	H	A	-	H	H	H	H	H	B	H	-	H	A	H	A	-	A	A	A	-	A	H	-	B	H	A	H	H	H	B	H	H	H	H	H	-	H	H	-	B
23620	A08	6769538	H	H	A	B	H	A	B	H	A	H	H	H	H	H	H	B	H	B	H	A	H	-	B	A	A	A	B	A	H	H	B	H	A	H	H	H	B	H	H	H	H	H	B	H	H	B	B
23641	A08	696249	H	H	A	B	B	A	B	H	H	H	H	H	H	H	H	B	H	H	H	A	H	A	B	A	A	A	B	A	H	H	B	H	H	H	H	B	B	B	H	H	B	H	B	H	H	H	B
23649	A08	7005896	H	H	H	B	H	A	B	H	A	H	H	H	H	H	H	B	H	B	H	A	H	A	B	A	A	A	B	A	H	H	B	H	A	A	H	H	B	H	H	H	H	H	B	H	H	B	B
23702	A08	7305292	H	H	-	B	B	A	B	H	H	H	H	H	H	H	H	B	H	H	H	A	H	A	B	A	A	A	B	A	H	H	B	H	A	H	H	H	B	H	H	H	B	H	B	H	H	B	B
23703	A08	7312054	-	H	H	H	H	B	B	A	H	B	A	B	A	H	A	H	H	H	B	A	H	A	H	H	A	H	A	H	H	A	A	A	A	A	H	A	B	H	B	H	B	H	H	A	A	B	B
23712	A08	7357159	H	H	-	B	B	A	B	H	H	-	H	H	H	H	H	-	H	H	H	A	-	-	B	A	A	A	-	A	H	H	B	H	A	H	H	H	B	H	H	H	-	H	B	H	H	-	-
23732	A08	7430565	H	H	A	B	B	A	B	H	H	H	H	H	H	H	H	B	H	H	H	A	H	A	B	A	A	A	B	A	H	H	B	H	A	H	H	H	B	H	H	H	B	-	B	H	H	B	-
23743	A08	7487317	H	H	H	H	H	H	H	H	H	H	H	H	H	H	H	H	H	H	H	H	H	H	H	H	A	H	H	H	H	H	H	H	H	H	H	H	H	H	H	H	H	H	H	H	H	H	H
23751	A08	7537155	H	H	-	B	B	A	B	H	H	H	H	H	H	H	H	B	H	H	H	A	H	A	B	A	A	A	B	A	H	H	B	H	A	H	H	H	B	H	H	H	B	H	B	H	H	B	B
23789	A08	7952352	H	H	A	B	H	A	-	H	-	H	H	H	H	H	H	B	H	H	H	A	H	A	B	A	A	A	-	A	H	H	B	H	A	H	H	H	B	H	H	H	B	H	B	H	H	B	B
23801	A08	802040	H	-	-	B	B	A	-	H	H	H	H	H	H	H	H	B	H	H	H	A	H	A	B	A	A	A	B	-	H	-	B	H	H	H	H	-	B	B	H	-	B	H	B	H	H	H	B
23807	A08	8029675	H	H	A	B	B	A	B	H	H	H	H	H	H	H	H	B	H	H	H	A	H	-	B	A	-	A	B	A	H	H	B	H	-	H	-	H	B	H	H	H	-	H	B	H	H	B	B
23817	A08	813146	H	H	A	B	B	A	B	H	H	H	H	H	H	H	H	B	H	H	H	A	H	A	B	A	A	A	B	A	H	H	B	H	H	H	H	B	B	B	H	H	B	H	B	H	H	H	B
23818	A08	8135751	H	H	A	B	B	A	B	H	H	H	H	H	H	H	H	B	H	H	H	A	H	A	B	A	A	A	B	A	H	H	B	H	A	H	H	H	B	H	H	H	B	H	B	H	H	B	B
23834	A08	8435286	H	H	A	B	H	A	B	H	H	-	H	H	H	H	H	-	H	H	H	A	H	A	B	-	A	A	B	A	H	H	B	H	A	H	H	H	-	H	H	H	B	H	B	H	H	B	-
23839	A08	8466056	H	H	A	B	H	A	B	H	H	H	H	H	H	H	H	B	H	H	H	A	H	A	B	A	A	-	-	A	H	H	B	H	A	H	H	H	B	H	H	H	B	H	B	H	H	B	B
23840	A08	8484354	H	H	A	B	H	A	B	H	H	H	H	H	H	H	H	B	H	H	-	A	H	A	B	A	A	A	-	A	H	H	-	H	A	H	H	H	B	H	H	H	B	H	B	H	H	B	B
23841	A08	8484778	H	H	A	B	H	A	B	H	H	H	H	H	H	H	H	B	H	H	H	A	H	A	B	A	A	-	B	A	H	H	B	H	A	H	H	H	B	H	H	H	B	H	B	H	H	B	B
23842	A08	8499291	H	H	A	-	H	A	B	H	H	H	H	H	H	H	H	B	H	H	H	A	H	A	B	A	A	A	B	A	H	H	B	H	-	H	H	H	B	H	H	H	B	H	B	H	H	B	B
23849	A08	8542299	H	H	-	B	H	A	B	H	H	H	H	H	H	H	H	B	H	H	H	A	H	A	B	A	-	A	B	A	H	H	B	H	A	H	H	H	B	H	H	H	B	H	B	H	H	B	B
23862	A08	8635477	H	H	A	B	H	A	B	H	H	H	H	H	H	H	H	B	H	H	H	A	H	A	B	A	A	A	-	A	H	H	B	H	A	H	H	H	B	H	H	H	B	H	B	H	H	B	B
23868	A08	8700907	H	H	A	B	H	A	B	H	H	H	H	H	H	H	H	B	H	H	H	A	H	A	B	A	A	A	H	A	H	H	B	H	A	H	H	H	B	H	H	H	B	-	B	H	H	B	B
23886	A08	8911873	H	H	A	B	H	A	B	H	H	H	H	H	H	H	H	B	H	B	H	A	H	A	B	A	A	A	B	A	H	H	B	H	A	H	H	H	B	H	H	H	B	H	B	H	H	B	B
23910	A08	9241427	H	H	H	B	H	-	B	H	A	H	H	H	H	H	H	B	H	B	H	A	H	A	B	A	A	A	B	A	H	H	B	H	A	A	H	H	B	H	H	H	H	H	B	H	H	B	B
23939	A08	93857	H	H	A	B	B	A	B	H	H	H	H	H	H	H	H	B	H	H	H	A	H	A	B	A	A	A	B	A	H	H	B	H	H	H	H	B	B	B	H	H	B	H	B	A	H	H	B
23949	A08	945481	H	H	A	B	B	A	B	H	H	H	H	H	H	H	H	B	H	H	H	A	H	A	B	A	A	A	B	A	H	H	B	H	H	H	H	B	B	B	H	H	B	H	B	H	H	H	B
23961	A08	958919	H	H	A	B	-	A	-	H	H	H	H	H	H	H	H	B	H	H	H	A	H	A	B	A	A	A	B	A	H	H	-	H	H	H	H	B	B	B	H	H	B	H	B	H	H	H	B
23963	A08	959488	H	H	A	B	B	A	B	H	H	H	H	H	H	H	H	B	H	H	H	A	H	A	B	A	A	A	B	A	H	H	B	H	H	H	H	B	B	B	H	H	B	H	B	H	H	H	B
24005	A08	9728754	H	H	H	B	H	-	B	H	-	H	-	H	H	H	H	B	H	B	H	A	H	-	B	A	-	A	-	A	H	H	-	H	-	A	-	H	H	H	A	H	H	H	-	H	-	B	B
24028	A08	9988943	H	H	H	-	H	A	-	H	A	H	B	H	-	H	H	H	H	-	-	A	H	A	B	A	-	-	B	A	H	H	-	H	A	-	H	H	H	-	A	H	H	H	-	H	H	B	B
24074	A09	10378228	H	A	H	B	B	H	-	H	A	B	B	B	H	A	-	H	H	H	B	A	-	-	A	H	H	H	-	A	H	B	H	H	B	A	A	B	A	A	H	B	A	H	A	H	B	H	-
24081	A09	10420511	H	A	H	B	B	H	B	H	A	B	B	B	H	A	B	H	H	H	B	A	H	-	A	H	H	H	H	A	H	B	H	H	B	A	-	-	A	A	H	-	A	H	A	H	B	H	B
24082	A09	10464375	H	A	H	B	B	H	B	H	-	B	B	B	H	A	B	H	H	H	B	A	H	-	A	-	H	H	H	A	H	B	H	H	-	A	-	B	A	A	H	-	A	H	A	H	B	H	B
24085	A09	10470082	H	A	H	H	H	H	H	H	A	H	H	H	H	A	H	H	H	H	H	-	H	B	A	H	-	H	H	A	H	H	H	H	B	A	-	H	-	A	H	H	A	H	A	H	H	H	H
24087	A09	10489629	H	A	H	B	B	H	B	H	A	B	B	B	H	A	B	H	H	H	B	A	H	B	A	H	-	H	H	A	H	B	H	H	B	A	A	B	A	A	H	B	A	H	A	-	B	H	B
24110	A09	10682772	H	A	H	B	B	H	B	H	-	-	B	B	H	A	-	H	H	H	B	A	H	B	A	H	H	H	H	A	H	B	H	H	-	A	A	B	A	A	H	B	A	H	A	H	B	-	B
24116	A09	10709926	H	A	H	B	B	H	B	H	A	B	B	B	H	A	B	H	H	H	B	A	H	B	A	H	H	H	H	A	H	B	H	H	-	-	A	B	A	A	H	B	A	H	A	H	B	H	B
24117	A09	10714717	H	A	H	B	B	H	B	H	A	B	B	B	H	A	B	H	H	H	-	A	H	B	A	H	H	H	H	A	H	-	H	H	B	A	A	B	A	A	H	B	-	H	-	H	B	H	B
24120	A09	10722644	H	A	H	B	B	H	B	H	A	B	B	B	-	A	B	H	H	H	B	A	H	B	A	H	H	H	H	A	H	B	H	-	B	A	A	B	-	A	H	B	A	H	A	H	B	H	B
24125	A09	10744378	H	A	H	B	B	H	B	H	A	B	B	B	H	-	B	H	H	B	B	-	H	B	A	H	H	H	H	A	H	B	H	H	B	A	-	B	A	A	H	B	A	H	A	H	B	H	B
24180	A09	1117342	B	A	H	B	H	H	A	H	B	B	B	-	B	-	A	B	-	-	B	-	-	A	A	H	H	B	-	-	H	B	A	B	B	H	H	H	H	H	H	B	H	H	A	H	H	H	B
24186	A09	11217494	H	H	H	H	H	H	H	H	H	H	H	H	H	H	H	H	H	H	H	H	H	H	H	H	H	H	H	H	H	H	H	H	H	H	H	H	H	H	H	H	H	H	H	H	H	H	H
24229	A09	11647386	H	A	H	-	B	H	B	H	A	B	-	B	H	A	B	H	H	B	B	-	H	-	-	H	H	H	H	-	H	B	H	H	B	A	A	-	-	A	H	B	-	H	-	H	-	H	B
24233	A09	11661183	-	A	H	B	B	H	B	H	A	B	B	B	H	A	B	H	H	B	B	A	H	B	A	H	H	H	-	A	H	B	H	H	B	A	A	B	A	A	H	B	A	H	-	H	B	H	B
24236	A09	11682497	H	A	H	-	B	H	B	H	-	B	B	-	H	A	B	-	H	B	B	A	H	B	A	H	H	H	H	A	H	-	H	H	B	A	A	B	A	A	H	B	A	H	A	-	B	H	B
24255	A09	11753032	H	A	H	B	B	H	B	H	-	B	B	B	H	A	B	H	H	B	B	-	H	B	A	H	H	H	H	A	H	B	H	H	B	A	A	B	A	A	H	B	A	H	A	H	B	H	B
24262	A09	11827484	H	A	H	B	B	H	B	H	A	B	B	B	H	A	B	H	H	B	B	A	H	B	A	H	H	H	H	A	H	B	H	H	B	A	A	B	A	A	H	B	A	H	A	H	B	H	B
24267	A09	11852764	-	A	-	B	B	H	B	H	A	B	B	B	H	A	B	H	H	B	B	A	H	B	A	H	H	H	H	A	H	B	H	H	B	A	-	B	A	A	H	-	A	H	A	H	B	H	B
24287	A09	12054345	H	A	H	B	B	H	B	H	A	B	B	B	H	A	B	H	H	B	B	A	H	B	A	H	H	H	H	A	H	B	H	H	B	A	A	B	A	A	H	H	A	H	A	H	-	H	B
24288	A09	12055381	H	A	H	B	B	H	B	H	A	B	B	B	H	A	B	H	H	B	B	A	H	B	A	H	H	H	H	A	H	B	H	H	B	A	A	-	A	A	H	B	A	H	A	H	B	-	B
24305	A09	1217010	B	A	-	-	H	H	A	H	H	B	B	A	B	B	A	B	B	A	B	H	B	A	A	H	H	B	B	H	H	B	A	B	B	H	H	H	H	H	H	B	H	H	A	A	H	H	B
24313	A09	1225431	-	A	H	B	H	H	A	H	H	B	B	A	B	B	-	B	-	A	B	H	B	A	A	-	H	B	B	H	H	-	A	B	B	H	H	H	H	H	H	-	H	H	A	A	H	H	B
24325	A09	12291818	H	A	H	B	B	H	B	H	A	B	B	B	H	A	B	H	H	B	B	A	-	B	A	H	-	H	H	A	H	B	H	H	B	A	A	B	A	A	H	B	A	H	A	H	B	H	B
24330	A09	1231776	B	A	H	B	H	H	A	H	H	B	B	A	B	-	A	B	B	A	B	H	B	A	A	H	H	B	B	H	H	B	A	B	B	H	H	H	H	H	H	B	H	-	A	-	H	H	B
24349	A09	12555248	H	A	H	B	B	B	B	H	A	B	B	B	H	A	B	H	H	B	B	-	H	B	A	H	H	H	H	A	H	B	H	H	B	A	A	B	A	A	H	B	A	B	A	H	B	H	B
24353	A09	12616271	-	A	H	B	B	B	B	H	A	B	B	B	H	A	B	H	H	B	B	A	H	B	A	H	H	H	H	A	H	B	H	H	B	A	A	-	A	A	H	B	A	B	A	H	B	H	B
24396	A09	1274551	B	A	H	-	H	H	A	H	H	B	B	A	B	B	A	B	B	A	B	H	B	A	A	H	H	B	B	H	H	B	A	B	B	H	H	H	H	H	H	-	H	H	A	A	H	H	B
24439	A09	13039893	H	-	H	-	-	B	-	H	A	B	B	B	H	A	B	A	H	-	B	A	H	-	A	H	H	-	-	A	H	-	H	H	B	A	-	B	A	A	H	B	-	B	A	H	B	H	B
24446	A09	1307685	B	A	H	-	H	H	A	H	H	B	B	A	B	B	A	B	B	-	B	H	B	A	A	H	H	B	B	H	H	B	A	B	B	H	H	H	H	H	H	B	H	H	A	A	H	H	B
24458	A09	13190136	H	A	H	B	B	B	B	H	-	B	B	-	H	A	B	A	H	B	B	-	H	-	A	H	H	H	H	A	H	B	H	H	B	A	-	B	A	A	H	-	A	B	A	H	B	H	B
24479	A09	13413332	H	A	H	B	B	-	B	H	A	B	B	B	H	A	B	A	H	B	B	A	H	B	A	H	H	H	H	A	H	-	H	H	B	A	A	B	A	A	H	B	H	B	A	H	-	H	B
24526	A09	13901714	H	H	H	B	B	-	B	H	A	B	B	-	H	A	B	A	H	B	-	-	H	B	A	H	H	H	H	-	H	B	H	H	B	A	A	-	A	-	H	B	H	B	A	H	B	H	B
24543	A09	14068587	H	H	H	B	B	B	B	H	A	B	B	B	H	A	B	A	H	B	B	A	H	B	A	H	H	H	B	A	H	B	H	H	B	A	A	B	A	A	H	B	H	B	A	H	B	H	B
24549	A09	14133530	H	H	H	B	B	B	B	H	A	B	B	B	H	A	B	A	H	B	B	A	H	B	A	H	H	H	B	A	H	-	H	H	B	A	A	B	A	A	H	B	H	B	A	H	-	H	B
24564	A09	14300483	H	H	H	B	B	-	-	H	-	-	B	-	H	A	B	-	H	B	B	A	H	B	A	H	H	H	B	-	H	B	H	H	B	-	-	B	A	A	H	B	H	B	A	H	B	H	B
24573	A09	14324191	A	A	H	H	A	H	H	H	H	H	A	H	H	H	H	H	-	H	A	H	H	H	H	H	A	H	H	H	H	H	H	H	H	A	H	H	A	H	H	H	-	H	H	H	A	H	H
24605	A09	14709827	H	H	H	B	B	B	-	H	A	B	B	B	H	A	B	A	H	B	B	A	H	B	A	H	H	H	B	A	H	B	H	H	B	A	A	B	A	A	H	B	H	B	A	H	B	H	B
24626	A09	14827165	H	H	H	H	H	H	H	-	-	H	H	H	H	A	H	A	H	H	H	-	H	H	H	H	H	-	H	-	H	H	H	H	H	A	A	H	A	-	H	H	H	H	A	H	H	H	H
24704	A09	15068095	H	H	H	H	H	H	H	A	H	H	A	H	A	-	A	H	H	H	H	A	H	A	-	H	A	H	-	-	H	A	A	A	A	A	H	-	H	H	H	H	H	H	H	A	A	H	H
24717	A09	15158721	H	H	H	H	H	H	H	H	H	H	H	H	H	H	H	H	H	H	H	H	H	H	H	H	H	H	H	H	H	H	H	H	H	H	H	-	H	H	-	H	H	H	-	H	H	H	H
24730	A09	1520792	B	A	H	B	H	H	A	H	H	B	B	A	B	B	A	B	B	A	B	H	B	A	A	H	H	B	B	H	H	B	A	B	B	H	H	H	H	H	H	B	H	H	A	A	H	H	B
24731	A09	1520968	-	A	H	B	H	H	-	H	H	-	B	A	B	B	A	B	B	A	B	H	B	A	-	H	H	B	B	H	H	B	A	B	B	H	H	H	H	H	H	B	H	H	A	A	H	H	-
24797	A09	1567695	-	A	H	B	-	H	A	H	H	B	B	A	B	B	A	B	B	-	B	H	-	A	A	H	H	B	B	H	H	B	A	B	B	H	H	H	H	H	H	-	H	H	A	A	H	H	B
24850	A09	15817221	H	H	H	H	A	H	H	H	A	A	H	-	A	H	H	H	H	H	H	-	H	H	H	H	H	H	-	-	A	H	H	A	A	H	H	H	H	H	H	-	-	-	H	H	H	A	H
24854	A09	1583989	B	A	H	B	H	H	A	H	H	B	B	A	B	B	A	B	B	A	B	H	B	A	A	H	H	B	H	H	H	B	A	B	B	H	H	H	H	H	H	B	H	H	A	A	H	H	B
24884	A09	1600300	B	A	H	B	H	H	A	H	H	B	B	A	B	B	A	B	B	A	B	H	B	A	A	H	H	B	H	H	H	B	A	B	B	H	H	H	H	H	H	B	H	H	A	A	H	H	B
24903	A09	161001	B	A	B	-	H	H	A	H	B	B	B	A	B	B	A	-	H	A	B	H	B	A	A	H	H	B	B	H	A	-	H	B	B	H	H	H	H	H	H	-	H	H	-	H	H	-	H
24929	A09	16254414	H	B	B	H	H	A	H	H	H	H	H	H	H	B	-	H	B	H	H	H	H	H	A	A	A	A	A	H	H	B	H	H	B	H	B	H	H	H	H	-	B	H	A	A	B	H	H
24961	A09	164945	B	A	B	B	H	H	A	H	B	B	B	A	B	B	A	-	H	A	B	H	B	A	-	H	H	B	B	H	A	B	-	B	B	H	H	H	H	H	H	B	H	H	A	H	-	H	H
24963	A09	16525012	H	H	H	B	B	B	B	H	A	B	B	B	H	A	B	A	H	B	B	A	H	B	H	H	H	H	B	A	H	B	H	H	-	A	A	B	A	A	H	B	H	B	A	H	B	H	B
24964	A09	16532712	H	H	H	B	B	B	B	H	A	B	B	B	H	A	B	A	H	B	-	-	H	B	H	H	H	-	B	A	H	B	H	H	B	A	A	B	A	A	H	B	H	B	A	H	B	H	B
24965	A09	16560761	H	H	H	B	B	B	B	H	A	B	B	B	H	A	B	A	H	B	B	A	H	B	H	H	H	H	B	A	H	B	H	H	B	A	A	B	A	A	H	B	H	B	A	H	B	H	B
24975	A09	16600835	H	H	H	B	B	B	B	H	A	B	B	B	H	A	B	A	H	B	-	A	H	B	H	H	H	H	-	A	H	-	H	H	B	A	A	B	A	A	H	B	-	B	A	H	B	H	B
24978	A09	16611229	H	H	H	B	-	B	B	H	A	-	B	B	H	A	B	A	H	B	B	A	-	B	-	H	H	H	B	A	H	B	H	H	B	A	A	B	A	A	H	-	H	B	A	H	B	H	B
24983	A09	16633158	H	H	B	H	B	B	-	H	-	H	H	B	H	A	H	A	B	H	-	-	H	H	A	H	H	H	H	-	H	H	H	H	H	A	A	H	-	A	B	H	H	H	A	H	-	B	B
24994	A09	166960	B	A	B	B	H	H	A	H	B	B	B	A	B	B	A	B	H	A	B	H	B	A	A	H	H	B	B	H	-	B	H	B	B	H	H	H	H	H	H	B	H	H	A	H	H	H	H
25008	A09	16830603	H	H	H	B	B	B	-	H	A	B	B	-	H	A	B	A	H	B	B	-	H	-	A	H	H	H	B	-	H	B	H	H	B	A	A	B	A	-	H	B	H	B	A	H	B	H	B
25010	A09	16833285	H	H	H	B	B	B	B	H	A	B	B	B	H	A	B	A	H	B	B	A	H	B	A	H	H	H	B	A	H	B	H	H	B	A	A	B	A	A	H	B	H	B	-	H	-	H	B
25046	A09	1712409	H	H	-	-	H	H	H	H	-	H	H	-	-	H	A	H	-	-	-	H	-	H	-	A	-	H	-	H	-	-	H	-	H	-	-	H	H	H	-	H	-	H	-	H	-	H	H
25047	A09	1712457	H	-	H	H	H	H	A	H	H	A	H	H	H	H	-	A	H	H	H	H	A	H	H	H	A	A	A	H	H	H	H	H	-	A	H	A	H	H	A	-	H	H	H	A	H	H	A
25066	A09	17520850	H	H	H	B	B	B	B	H	A	B	B	B	H	A	B	A	H	B	B	A	H	-	A	H	H	H	B	A	H	B	H	H	B	A	A	B	A	A	H	B	H	B	A	H	B	H	B
25068	A09	17537346	H	H	H	B	B	B	B	H	A	B	B	B	H	A	B	A	H	B	B	A	H	B	A	H	H	H	B	A	H	B	H	H	-	A	A	B	A	A	H	B	H	B	A	H	B	H	B
25079	A09	17629516	H	-	H	B	-	B	B	H	A	-	B	B	H	A	-	A	H	B	-	A	H	B	A	H	-	H	B	A	H	-	H	H	B	-	-	B	A	A	H	B	-	-	A	H	B	H	B
25090	A09	17726241	H	H	H	B	B	B	B	H	A	B	B	B	H	A	B	A	H	B	B	A	H	B	A	H	H	H	B	A	H	B	H	H	B	A	A	B	A	A	H	B	H	B	A	H	B	H	B
25091	A09	17739561	H	H	H	-	B	-	B	H	A	B	B	-	H	A	B	A	H	B	B	A	H	B	A	H	H	H	B	A	H	B	H	H	-	-	-	B	A	A	H	B	H	-	A	H	B	H	B
25094	A09	17795580	H	H	H	B	B	B	B	H	A	-	B	B	H	A	B	A	H	B	B	A	H	B	A	H	H	H	-	A	H	B	H	H	B	A	A	B	A	A	H	B	H	B	A	-	B	H	B
25096	A09	17796072	H	H	H	B	B	B	B	H	A	B	B	B	H	A	-	A	H	B	B	A	H	-	A	H	H	H	-	A	H	B	H	H	B	A	A	B	A	A	H	B	H	B	-	H	B	H	B
25104	A09	17852773	H	H	H	B	B	B	-	H	A	B	B	B	H	A	B	A	H	B	B	A	H	B	A	H	H	H	B	A	H	B	H	H	B	A	A	B	A	A	H	B	H	B	A	H	B	H	B
25123	A09	180183	B	H	B	B	H	H	A	H	B	B	B	A	B	-	A	B	H	A	B	H	B	A	A	H	H	B	B	H	-	B	H	B	B	H	H	H	H	H	H	-	H	H	A	H	H	H	H
25138	A09	18178656	H	H	H	H	H	H	H	H	-	-	H	H	H	H	H	H	H	H	H	H	H	H	H	H	H	H	-	H	H	H	-	-	H	H	H	H	-	H	H	H	H	H	H	H	H	H	H
25146	A09	18418040	H	H	H	B	B	-	B	H	A	B	B	B	H	A	B	A	H	-	B	A	H	-	A	H	H	H	B	-	H	B	H	H	B	A	A	B	A	A	H	B	H	B	A	H	-	H	B
25192	A09	18608423	H	A	-	A	H	H	H	-	H	-	-	-	-	H	H	-	-	-	-	H	-	-	-	H	-	H	H	H	H	H	H	H	H	H	-	H	H	H	H	H	H	H	H	H	H	H	-
25369	A09	19839354	H	H	H	H	H	H	H	H	H	H	H	H	H	H	H	H	H	H	H	H	H	H	H	H	H	H	H	H	H	H	H	H	H	H	H	H	H	H	H	H	H	H	H	H	H	H	H
25403	A09	20101070	H	H	H	B	B	B	B	H	A	B	B	B	H	A	B	A	H	B	B	A	H	B	H	H	H	H	B	A	H	B	H	H	B	A	A	B	A	A	H	B	H	B	A	H	B	H	B
25411	A09	20205096	H	H	H	B	B	B	-	H	A	B	B	B	-	A	-	A	H	-	B	A	H	B	H	H	H	H	B	A	H	B	H	H	B	A	-	B	A	-	H	-	H	-	A	H	B	H	-
25424	A09	20298368	H	H	H	-	B	B	B	H	A	B	B	B	H	A	B	A	H	B	B	A	H	B	H	H	H	H	-	A	H	B	H	H	B	A	A	-	A	A	H	B	H	B	A	H	B	H	B
25427	A09	20307379	H	H	H	B	B	B	B	H	-	B	B	B	H	A	B	-	H	B	B	A	H	B	H	H	H	H	B	A	H	-	H	H	B	A	A	B	A	A	H	B	H	H	A	H	B	H	B
25429	A09	20326754	H	H	H	B	B	B	-	H	A	B	B	B	H	A	B	A	H	B	-	A	H	B	H	H	H	H	B	A	H	B	H	H	B	A	A	B	A	A	H	B	H	B	A	H	B	H	B
25445	A09	20516086	H	H	H	B	B	B	B	H	A	B	B	B	H	A	B	A	H	B	B	A	H	B	H	H	H	H	B	A	H	B	H	H	B	A	A	B	A	A	H	B	H	B	A	H	B	H	B
25455	A09	20675550	A	H	B	H	H	H	B	-	H	B	B	H	B	-	A	H	H	A	A	H	H	H	A	B	A	H	H	H	H	H	A	B	H	-	H	H	A	A	H	A	B	B	H	H	H	B	B
25471	A09	20788955	H	H	H	B	B	B	B	H	A	B	B	B	H	A	-	A	H	-	-	A	H	B	H	H	H	H	B	A	H	B	H	H	-	A	-	B	A	A	H	B	H	B	A	H	B	H	B
25480	A09	20891633	H	H	H	B	B	B	B	H	A	B	B	B	H	A	B	A	H	B	B	A	H	B	H	H	H	H	B	A	H	B	-	H	B	A	A	B	A	A	H	B	H	B	A	H	B	H	B
25546	A09	21576916	H	H	H	-	B	B	-	H	A	B	B	B	H	A	B	A	H	B	B	A	H	B	H	H	H	H	B	A	H	-	H	H	B	A	A	B	A	A	H	-	H	-	A	H	B	H	-
25571	A09	21800853	H	H	H	-	B	-	B	H	A	B	-	B	H	A	-	-	H	-	-	-	-	-	H	H	H	H	B	-	H	-	H	-	-	-	-	B	A	A	H	-	H	B	A	H	B	H	-
25572	A09	21804981	H	H	H	B	B	B	B	H	A	B	B	B	H	-	B	A	H	B	B	A	H	B	H	H	H	-	B	A	H	B	H	H	-	A	-	B	A	-	H	B	-	B	A	H	B	H	-
25582	A09	2187310	H	A	H	B	H	H	H	H	H	B	B	A	B	B	-	-	H	H	B	H	B	A	A	H	H	B	H	A	H	B	A	B	B	H	H	H	-	A	H	B	H	H	A	A	H	H	B
25599	A09	2201430	B	A	H	B	H	H	H	H	H	B	B	-	B	B	A	B	H	H	-	H	B	A	A	H	H	B	H	A	H	B	A	B	B	H	H	H	H	A	H	B	H	H	A	A	H	H	B
[truncated: 371 more rows]
[truncated: 35 more columns]
